# Supplementary material for: Regerite, KFe6(PO4)4(OH)7(H2O)6 ⋅ 4H2O, the first new mineral species from the Kreuzberg pegmatite, Pleystein, Oberpfalz, Bavaria, Germany
Source: Copernicus journal article supplement (doi:10.5194/ejm-35-805-2023), 2023-09-25
Supplement: Supplementary file 1 [file ejm-35-805-2023-supplement.pdf]

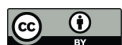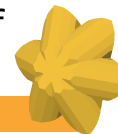

*Supplement of*

**Regerite,  $\text{KFe}_6(\text{PO}_4)_4(\text{OH})_7(\text{H}_2\text{O})_6 \cdot 4\text{H}_2\text{O}$ , the first new mineral species from the Kreuzberg pegmatite, Pleystein, Oberpfalz, Bavaria, Germany**

**Christian Rewitzer et al.**

*Correspondence to:* Ian E. Grey ([ian.grey@csiro.au](mailto:ian.grey@csiro.au))

The copyright of individual parts of the supplement might differ from the article licence.

regerite.cif

```
#=====
data_global
#=====
```

```
_audit_creation_method          'Jana2006 Version : 25/03/2021'
```

```
# 1. PROCESSING SUMMARY (IUCr Office Use Only)
```

```
_journal_date_recd_electronic   ?
_journal_date_to_coeditor       ?
_journal_date_from_coeditor     ?
_journal_date_accepted          ?
_journal_date_printers_first    ?
_journal_date_printers_final    ?
_journal_date_proofs_out        ?
_journal_date_proofs_in         ?
_journal_coeditor_name          ?
_journal_coeditor_code          ?
_journal_coeditor_notes        ; ?
;
_journal_techeditor_code        ?
_journal_paper_category         ?
_journal_techeditor_notes      ; ?
;
_journal_coden_ASTM             ?
_journal_name_full              'Acta Crystallographica Section C'
_journal_year                   ?
_journal_volume                 ?
_journal_issue                  ?
_journal_page_first             ?
_journal_page_last              ?
_journal_suppl_publ_number      ?
_journal_suppl_publ_pages       ?
```

```
#=====
```

```
# 2. SUBMISSION DETAILS
```

```
_publ_contact_author_name       ?
_publ_contact_author_address    ; ?
;
_publ_contact_author_email       ?
_publ_contact_author_fax        ?
_publ_contact_author_phone       ?

_publ_requested_journal          'Acta Crystallographica Section C'
_publ_requested_category         ?

_publ_contact_letter
```

```
; ?  
;  
  
#=====
```

# 3. TITLE AND AUTHOR LIST

```
_publ_section_title  
; ?  
;  
_publ_section_title_footnote  
; ?  
;  
loop_  
  _publ_author_name  
  _publ_author_footnote  
  _publ_author_address  
; ?      # name  
;  
; ?      # footnote  
;  
; ?      # address  
;  
  
#=====
```

# 4. TEXT

```
_publ_section_synopsis  
; ?  
;  
_publ_section_abstract  
; ?  
;  
_publ_section_comment  
; ?  
;  
_publ_section_introduction  
; ?  
;  
_publ_section_experimental  
; ?  
;  
_publ_section_exptl_prep  
; ?  
;  
_publ_section_exptl_refinement  
; ?  
;  
_publ_section_exptl_solution  
; ?  
;  
_publ_section_discussion  
; ?
```

```
;
_publ_section_acknowledgements
; ?
;
_publ_section_references
;
Petricek, V., Dusek, M. & Palatinus L. (2014). Z. Kristallogr. 229(5), 345-352.

Palatinus L. & Chapuis G. (2007). J. Appl. Cryst. 40, 786-790.

# enable this reference if Diamond ver. 2 was used for visualization
#Brandenburg, K. (1999). DIAMOND. Version. 2.1c.
#Crystal Impact GbR, Bonn, Germany.

# enable this reference if Diamond ver. 3 was used for visualization
#Brandenburg, K. & Putz, H. (2005). DIAMOND Version 3.
#Crystal Impact GbR, Postfach 1251, D-53002 Bonn, Germany.

# enable this reference if SIR97 was used for solving of the structure
#Altomare, A., Burla, M. C., Camalli, M., Cascarano, G., Giacovazzo, C.,
#Guagliardi, A., Moliterni, A. G. G., Polidori, G., Spagna, R. (1997).
#SIR97. A Package for Crystal Structure Solution by Direct Methods
#and Refinement, Bari, Rome, Italy.

# use this reference if SIR2002 was used for solving of the structure
#Burla, M.C., Camalli, M., Carrozzini, B., Cascarano, G., Giacovazzo, C.,
#Polidori, G., Spagna, R.
#SIR2002: the program, J. Appl. Cryst, (2003). 36, 1103

# use this reference if SIR2011 was used for solving of the structure
#Burla, M.C., Caliandro, R., Camalli, M., Carrozzini, B., Cascarano,
#G.L., Giacovazzo, C., Mallamo, M., Mazzone, A., Polidori, G., Spagna, R.
#SIR2011: a new package for crystal structure determination and refinement,
#J.Appl.Cryst. (2012) 45, 357-361

# enable this reference if bond valences were calculated
#Brown, I. D. (1996). J. Appl. Cryst. 29, 479-480.

# enable this reference if Xshape was used for crystal shape refinement
#Stoe & Cie (1998). X-SHAPE. Stoe & Cie, Darmstadt, Germany.

# enable this reference if Flack coefficient was refined
#Flack, H. D. (1983). Acta Cryst. A39, 876-881.
;
_publ_section_figure_captions
; ?
;
_publ_section_table_legends
; ?
;

#=====
```

data\_I

#=====

## # 5. CHEMICAL DATA

```
_chemical_name_systematic
; ?
;
_chemical_name_common          ?
_chemical_formula_moiety       ?
_chemical_formula_structural   ?
_chemical_formula_analytical   ?
_chemical_formula_iupac        ?
_chemical_formula_sum           'Fe6 H27 K1 O33 P4'
_chemical_formula_weight       1053.3
_chemical_melting_point        ?
_chemical_compound_source       ?
_chemical_absolute_configuration .
```

#=====

## # 6. CRYSTAL DATA

```
_symmetry_cell_setting         monoclinic
_symmetry_space_group_name_H-M 'P 1 21/c 1'
_symmetry_space_group_name_Hall '-P 2ycb'
_symmetry_Int_Tables_number    14
```

loop\_

```
_space_group_symop_id
_space_group_symop_operation_xyz
1  x,y,z
2  -x,y+1/2,-z+1/2
3  -x,-y,-z
4  x,-y+1/2,z+1/2
```

```
_cell_length_a                15.353(3)
_cell_length_b                 17.351(4)
_cell_length_c                 9.887(2)
_cell_angle_alpha              90
_cell_angle_beta               95.26(3)
_cell_angle_gamma              90
_cell_volume                    2622.7(10)
```

loop\_

```
_twin_individual_id
_twin_individual_mass_fraction_refined
_twin_individual_twin_matrix_11
_twin_individual_twin_matrix_12
_twin_individual_twin_matrix_13
_twin_individual_twin_matrix_21
_twin_individual_twin_matrix_22
_twin_individual_twin_matrix_23
_twin_individual_twin_matrix_31
```

```
_twin_individual_twin_matrix_32
_twin_individual_twin_matrix_33
? ? ? ? ? ? ? ? ? ? ?
```

```
_cell_formula_units_Z 4
```

```
_cell_measurement_reflns_used 47223
_cell_measurement_theta_min 1.33
_cell_measurement_theta_max 32.08
_cell_measurement_temperature 100
_cell_special_details
; ?
;
```

```
_exptl_crystal_density_diffn 2.6674
_exptl_crystal_density_meas ?
_exptl_crystal_density_method ?
_exptl_crystal_F_000 2096
```

```
_exptl_absorpt_coefficient_mu 3.663
_exptl_crystal_description "blade"
_exptl_crystal_size_max 0.035
_exptl_crystal_size_mid 0.015
_exptl_crystal_size_min 0.005
_exptl_crystal_size_rad ?
_exptl_crystal_colour "colourless"
_exptl_absorpt_correction_type "multi-scan"
_exptl_absorpt_process_details ?
_exptl_absorpt_correction_T_min 0.33
_exptl_absorpt_correction_T_max 0.43
loop_
_exptl_crystal_face_index_h
_exptl_crystal_face_index_k
_exptl_crystal_face_index_l
_exptl_crystal_face_perp_dist
? ? ? ?
```

```
#=====
```

## # 7. EXPERIMENTAL DATA

```
_exptl_special_details ?
_diffn_ambient_temperature 100
_diffn_source ?
_diffn_source_power ?
_diffn_source_voltage ?
_diffn_source_current ?
_diffn_radiation_type 'synchrotron'
_diffn_radiation_source 'synchrotron'
_diffn_radiation_wavelength 0.7109
_diffn_radiation_monochromator ?
_diffn_measurement_device 'synchrotron'
_diffn_measurement_device_type 'synchrotron'
```

regerite.cif

\_diffraction\_detector ?  
\_diffraction\_detector\_area\_resolution\_mean ?  
\_diffraction\_measurement\_method ?  
\_diffraction\_measurement\_specimen\_support ?  
  
\_diffraction\_reflections\_number 47223  
\_diffraction\_reflections\_theta\_min 1.33  
\_diffraction\_reflections\_theta\_max 32.08  
\_diffraction\_reflections\_theta\_full 28.01  
\_diffraction\_measured\_fraction\_theta\_max 0.83  
\_diffraction\_measured\_fraction\_theta\_full 0.98  
\_diffraction\_reflections\_av\_R\_equivalents 0.0648  
\_diffraction\_reflections\_av\_unetI/netI 0.0424  
\_diffraction\_reflections\_limit\_h\_min -20  
\_diffraction\_reflections\_limit\_h\_max 20  
\_diffraction\_reflections\_limit\_k\_min -24  
\_diffraction\_reflections\_limit\_k\_max 24  
\_diffraction\_reflections\_limit\_l\_min -12  
\_diffraction\_reflections\_limit\_l\_max 12  
\_diffraction\_reflections\_reduction\_process ?  
  
\_diffraction\_standards\_number ?  
\_diffraction\_standards\_interval\_count ?  
\_diffraction\_standards\_interval\_time ?  
\_diffraction\_standards\_decay\_percent ?  
loop\_  
\_diffraction\_standard\_reflection\_index\_h  
\_diffraction\_standard\_reflection\_index\_k  
\_diffraction\_standard\_reflection\_index\_l  
? ? ?

\_diffraction\_radiation\_probe X-ray

#=====

## # 8. REFINEMENT DATA

\_refinement\_special\_details  
; ?  
;  
  
\_reflections\_number\_total 7303  
\_reflections\_number\_gt 6088  
\_reflections\_threshold\_expression 'I>3\sigma(I)'  
  
\_refinement\_ls\_structure\_factor\_coef F  
\_refinement\_ls\_R\_factor\_gt 0.0473  
\_refinement\_ls\_wR\_factor\_gt 0.0652  
\_refinement\_ls\_R\_factor\_all 0.0539  
\_refinement\_ls\_wR\_factor\_ref 0.0668  
\_refinement\_ls\_goodness\_of\_fit\_ref 2.26  
\_refinement\_ls\_goodness\_of\_fit\_gt 2.43  
\_refinement\_ls\_restrained\_S\_gt ?  
\_refinement\_ls\_restrained\_S\_all ?

## regerite.cif

```

_refine_ls_number_reflns          7303
_refine_ls_number_parameters      473
_refine_ls_number_restraints      34
_refine_ls_number_constraints     24
_refine_ls_weighting_scheme       sigma
_refine_ls_weighting_details      'w=1/(\s^2^(F)+0.0001F^2^)'
_refine_ls_hydrogen_treatment     'refall'
_refine_ls_shift/su_max           0.0471
_refine_ls_shift/su_mean         0.0010
_refine_diff_density_max          1.06
_refine_diff_density_min         -1.73
_refine_ls_extinction_method      'none'
_refine_ls_extinction_coef        ?
_refine_ls_extinction_expression  ?
_refine_ls_abs_structure_details  ?
_refine_ls_abs_structure_Flack    ?
_refine_ls_abs_structure_Rogers   ?

```

## loop\_

```

_atom_type_symbol
_atom_type_scatter_dispersion_real
_atom_type_scatter_dispersion_imag
_atom_type_scatter_source
Fe  0.3486  0.8535
'International Tables Vol C tables 4.2.6.8 and 6.1.1.1'
H   0.0000  0.0000
'International Tables Vol C tables 4.2.6.8 and 6.1.1.1'
K   0.2025  0.2536
'International Tables Vol C tables 4.2.6.8 and 6.1.1.1'
O   0.0114  0.0062
'International Tables Vol C tables 4.2.6.8 and 6.1.1.1'
P   0.1041  0.0961
'International Tables Vol C tables 4.2.6.8 and 6.1.1.1'

```

```

_computing_data_collection        ?
_computing_cell_refinement        ?
_computing_data_reduction         ?
_computing_structure_solution     ?
_computing_structure_refinement   ?
_computing_molecular_graphics     ?
_computing_publication_material   ?

```

## loop\_

```

_restr_distance_atom_site_label_1
_restr_distance_site_symmetry_1
_restr_distance_atom_site_label_2
_restr_distance_site_symmetry_2
_restr_distance_target
_restr_distance_target_weight_param
019 . H19 . 0.85 0.01
020 . H20 . 0.85 0.01
021 . H21 . 0.85 0.01
024 . H24a . 0.85 0.01
024 . H24b . 0.85 0.01

```



025 . H25a . 0.85 0.01  
025 . H25b . 0.85 0.01  
026 . H26a . 0.85 0.01  
026 . H26b . 0.85 0.01  
027 . H27a . 0.85 0.01  
027 . H27b . 0.85 0.01  
028 . H28a . 0.85 0.01  
028 . H28b . 0.85 0.01  
029 . H29a . 0.85 0.01  
029 . H29b . 0.85 0.01  
030 . H30a . 0.85 0.01  
031 . H31a . 0.85 0.01  
031 . H31b . 0.85 0.01  
032 . H32a . 0.85 0.01  
033 . H33a . 0.85 0.01  
033 . H33b . 0.85 0.01  
032 . H32b . 0.85 0.01  
017 . H17 . 0.85 0.01  
018 . H18 . 0.85 0.01  
023 . H23 . 0.85 0.01

loop\_  
\_restr\_angle\_atom\_site\_label\_1  
\_restr\_angle\_site\_symmetry\_1  
\_restr\_angle\_atom\_site\_label\_2  
\_restr\_angle\_site\_symmetry\_2  
\_restr\_angle\_atom\_site\_label\_3  
\_restr\_angle\_site\_symmetry\_3  
\_restr\_angle\_target  
\_restr\_angle\_target\_weight\_param  
H24a . 024 . H24b . 109.47 0.01  
H25a . 025 . H25b . 109.47 0.01  
H26a . 026 . H26b . 109.47 0.01  
H27a . 027 . H27b . 109.47 0.01  
H28a . 028 . H28b . 109.47 0.01  
H29a . 029 . H29b . 109.47 0.01  
H31a . 031 . H31b . 109.47 0.01  
H33a . 033 . H33b . 109.47 0.01  
H32a . 032 . H32b . 109.47 0.01

loop\_  
\_restr\_torsion\_atom\_site\_label\_1  
\_restr\_torsion\_site\_symmetry\_1  
\_restr\_torsion\_atom\_site\_label\_2  
\_restr\_torsion\_site\_symmetry\_2  
\_restr\_torsion\_atom\_site\_label\_3  
\_restr\_torsion\_site\_symmetry\_3  
\_restr\_torsion\_atom\_site\_label\_4  
\_restr\_torsion\_site\_symmetry\_4  
\_restr\_torsion\_angle\_target  
\_restr\_torsion\_weight\_param  
? ? ? ? ? ? ? ? ? ?

loop\_

regerite.cif

\_restr\_equal\_distance\_atom\_site\_label\_1  
\_restr\_equal\_distance\_site\_symmetry\_1  
\_restr\_equal\_distance\_atom\_site\_label\_2  
\_restr\_equal\_distance\_site\_symmetry\_2  
\_restr\_equal\_distance\_class\_class\_id  
\_restr\_equal\_distance\_class\_target\_weight\_param  
? ? ? ? ? ?

loop\_  
\_restr\_equal\_angle\_atom\_site\_label\_1  
\_restr\_equal\_angle\_site\_symmetry\_1  
\_restr\_equal\_angle\_atom\_site\_label\_2  
\_restr\_equal\_angle\_site\_symmetry\_2  
\_restr\_equal\_angle\_atom\_site\_label\_3  
\_restr\_equal\_angle\_site\_symmetry\_3  
\_restr\_equal\_angle\_class\_class\_id  
\_restr\_equal\_angle\_class\_target\_weight\_param  
? ? ? ? ? ? ? ?

loop\_  
\_restr\_equal\_torsion\_atom\_site\_label\_1  
\_restr\_equal\_torsion\_site\_symmetry\_1  
\_restr\_equal\_torsion\_atom\_site\_label\_2  
\_restr\_equal\_torsion\_site\_symmetry\_2  
\_restr\_equal\_torsion\_atom\_site\_label\_3  
\_restr\_equal\_torsion\_site\_symmetry\_3  
\_restr\_equal\_torsion\_atom\_site\_label\_4  
\_restr\_equal\_torsion\_site\_symmetry\_4  
\_restr\_equal\_torsion\_class\_class\_id  
\_restr\_equal\_torsion\_class\_target\_weight\_param  
? ? ? ? ? ? ? ? ? ?

#=====

## # 9. ATOMIC COORDINATES AND DISPLACEMENT PARAMETERS

loop\_  
\_atom\_site\_label  
\_atom\_site\_type\_symbol  
\_atom\_site\_fract\_x  
\_atom\_site\_fract\_y  
\_atom\_site\_fract\_z  
\_atom\_site\_adp\_type  
\_atom\_site\_U\_iso\_or\_equiv  
\_atom\_site\_site\_symmetry\_multiplicity  
\_atom\_site\_occupancy  
\_atom\_site\_calc\_flag  
\_atom\_site\_refinement\_flags  
\_atom\_site\_disorder\_assembly  
\_atom\_site\_disorder\_group  
Fe1 Fe 0.55318(3) 0.46994(3) 1.24646(5) Uani 0.01035(13) 4 1 d . . .  
Fe2 Fe -0.05199(3) 0.47511(3) -0.25103(5) Uani 0.01067(13) 4 1 d . . .  
Fe3 Fe 0.31905(3) 0.23659(3) 0.36126(5) Uani 0.01260(13) 4 1 d . . .

## regerite.cif

Fe4 Fe 0.16675(3) 0.25914(3) 0.13879(5) Uani 0.01310(13) 4 1 d . . .  
Fe5 Fe 0.52332(3) 0.33397(3) 0.75940(5) Uani 0.01276(13) 4 1 d . . .  
Fe6 Fe -0.03968(3) 0.33441(3) 0.23663(5) Uani 0.01262(13) 4 1 d . . .  
P1 P 0.06371(5) 0.40462(4) 0.00559(8) Uani 0.0100(2) 4 1 d . . .  
P2 P 0.42535(5) 0.40758(5) 0.99210(8) Uani 0.0102(2) 4 1 d . . .  
P3 P -0.02592(5) 0.32250(4) 0.56106(9) Uani 0.0107(2) 4 1 d . . .  
P4 P 0.51069(5) 0.32054(4) 0.43817(8) Uani 0.0103(2) 4 1 d . . .  
K1 K 0.33912(5) 0.45164(5) 1.34081(9) Uani 0.0253(2) 4 1 d . . .  
O1 O 0.13173(14) 0.34020(13) 0.0048(2) Uani 0.0129(6) 4 1 d . . .  
O2 O 0.04733(14) 0.43321(13) -0.1413(2) Uani 0.0124(6) 4 1 d . . .  
O3 O 0.10057(14) 0.46964(13) 0.1001(2) Uani 0.0136(6) 4 1 d . . .  
O4 O -0.02250(14) 0.37438(13) 0.0545(2) Uani 0.0118(6) 4 1 d . . .  
O5 O 0.35313(14) 0.34670(13) 0.9948(2) Uani 0.0128(6) 4 1 d . . .  
O6 O 0.44578(14) 0.43776(13) 1.1373(2) Uani 0.0118(6) 4 1 d . . .  
O7 O 0.50936(14) 0.37314(13) 0.9430(2) Uani 0.0119(6) 4 1 d . . .  
O8 O 0.39228(14) 0.47395(13) 0.8968(2) Uani 0.0129(6) 4 1 d . . .  
O9 O 0.07267(14) 0.31203(13) 0.5648(2) Uani 0.0140(6) 4 1 d . . .  
O10 O -0.06730(14) 0.27318(13) 0.6676(2) Uani 0.0117(6) 4 1 d . . .  
O11 O -0.06862(13) 0.30110(13) 0.4182(2) Uani 0.0118(6) 4 1 d . . .  
O12 O -0.04746(15) 0.40851(13) 0.5867(2) Uani 0.0143(6) 4 1 d . . .  
O13 O 0.55429(14) 0.30197(13) 0.5802(2) Uani 0.0116(6) 4 1 d . . .  
O14 O 0.41163(14) 0.30867(13) 0.4355(2) Uani 0.0138(6) 4 1 d . . .  
O15 O 0.55246(14) 0.27140(13) 0.3323(2) Uani 0.0117(6) 4 1 d . . .  
O16 O 0.52615(15) 0.40664(13) 0.4070(2) Uani 0.0134(6) 4 1 d . . .  
O17 O 0.48969(15) 0.55760(13) 1.3131(2) Uani 0.0136(6) 4 1 d . . .  
O18 O 0.02251(15) 0.55689(13) -0.3112(2) Uani 0.0140(6) 4 1 d . . .  
O19 O 0.39848(14) 0.30908(14) 0.7330(2) Uani 0.0132(6) 4 1 d . . .  
O20 O 0.21251(14) 0.18049(13) 0.2764(2) Uani 0.0121(6) 4 1 d . . .  
O21 O 0.27143(14) 0.31712(13) 0.2248(2) Uani 0.0123(6) 4 1 d . . .  
O22 O 0.24355(13) 0.21844(14) 0.0009(2) Uani 0.0117(6) 4 1 d . . .  
O23 O 0.08699(14) 0.31052(13) 0.2682(2) Uani 0.0131(6) 4 1 d . . .  
O24 O 0.66477(16) 0.49134(16) 1.3770(3) Uani 0.0216(7) 4 1 d . . .  
O25 O 0.61928(14) 0.37360(13) 1.1725(2) Uani 0.0130(6) 4 1 d . . .  
O26 O -0.12991(15) 0.38379(13) -0.1827(2) Uani 0.0145(6) 4 1 d . . .  
O27 O -0.15651(17) 0.53842(17) -0.3689(3) Uani 0.0241(8) 4 1 d . . .  
O28 O 0.66122(15) 0.35621(14) 0.8084(3) Uani 0.0155(7) 4 1 d . . .  
O29 O -0.17308(15) 0.36002(15) 0.1892(3) Uani 0.0185(7) 4 1 d . . .  
O30 O 0.72783(18) 0.38733(17) 1.5645(3) Uani 0.0275(9) 4 1 d . . .  
O31 O 0.25209(14) 0.54222(16) 1.0075(2) Uani 0.0180(8) 4 1 d . . .  
O32 O 0.82586(16) 0.54008(14) 1.3487(3) Uani 0.0158(7) 4 1 d . . .  
O33 O 0.75380(17) 0.23123(16) 0.8817(3) Uani 0.0249(8) 4 1 d . . .  
H28a H 0.676(3) 0.3914(19) 0.862(4) Uiso 0.045(3) 4 1 d . . .  
H29a H -0.190(3) 0.391(3) 0.126(4) Uiso 0.045(3) 4 1 d . . .  
H28b H 0.690(3) 0.3164(18) 0.831(4) Uiso 0.045(3) 4 1 d . . .  
H26a H -0.119(3) 0.345(2) -0.229(4) Uiso 0.045(3) 4 1 d . . .  
H27a H -0.168(4) 0.4922(14) -0.362(4) Uiso 0.045(3) 4 1 d . . .  
H24a H 0.7195(15) 0.487(2) 1.369(5) Uiso 0.045(3) 4 1 d . . .  
H20 H 0.182(3) 0.168(3) 0.339(4) Uiso 0.045(3) 4 1 d . . .  
H31a H 0.218(3) 0.5139(17) 1.047(5) Uiso 0.045(3) 4 1 d . . .  
H29b H -0.2165(19) 0.338(3) 0.217(4) Uiso 0.045(3) 4 1 d . . .  
H21 H 0.301(3) 0.329(3) 0.162(4) Uiso 0.045(3) 4 1 d . . .  
H32a H 0.816(3) 0.5811(16) 1.324(5) Uiso 0.045(3) 4 1 d . . .  
H24b H 0.650(3) 0.5376(14) 1.368(5) Uiso 0.045(3) 4 1 d . . .  
H33a H 0.740(3) 0.1864(17) 0.915(4) Uiso 0.045(3) 4 1 d . . .

## regerite.cif

H31b H 0.284(3) 0.5146(18) 0.961(5) Uiso 0.045(3) 4 1 d . . .  
H33b H 0.773(3) 0.261(2) 0.946(3) Uiso 0.045(3) 4 1 d . . .  
H30a H 0.769(3) 0.370(3) 1.617(4) Uiso 0.045(3) 4 1 d . . .  
H27b H -0.157(3) 0.551(2) -0.451(2) Uiso 0.045(3) 4 1 d . . .  
H19 H 0.394(4) 0.301(3) 0.651(2) Uiso 0.045(3) 4 1 d . . .  
H25a H 0.602(3) 0.336(2) 1.217(4) Uiso 0.045(3) 4 1 d . . .  
H25b H 0.595(3) 0.372(3) 1.093(3) Uiso 0.045(3) 4 1 d . . .  
H26b H -0.109(3) 0.377(3) -0.101(3) Uiso 0.045(3) 4 1 d . . .  
H32b H 0.866(2) 0.525(2) 1.317(5) Uiso 0.045(3) 4 1 d . . .  
H18 H 0.018(4) 0.559(3) -0.397(2) Uiso 0.045(3) 4 1 d . . .  
H23 H 0.097(4) 0.293(3) 0.344(3) Uiso 0.045(3) 4 1 d . . .  
H17 H 0.500(3) 0.569(3) 1.395(3) Uiso 0.045(3) 4 1 d . . .

## loop\_

\_atom\_site\_aniso\_label

\_atom\_site\_aniso\_type\_symbol

\_atom\_site\_aniso\_U\_11

\_atom\_site\_aniso\_U\_22

\_atom\_site\_aniso\_U\_33

\_atom\_site\_aniso\_U\_12

\_atom\_site\_aniso\_U\_13

\_atom\_site\_aniso\_U\_23

Fe1 Fe 0.0111(2) 0.0100(2) 0.0101(3) -0.00048(14) 0.00168(15) 0.00047(15)  
Fe2 Fe 0.0119(2) 0.0099(2) 0.0104(3) 0.00054(14) 0.00157(15) -0.00058(15)  
Fe3 Fe 0.0133(2) 0.0120(2) 0.0124(3) -0.00014(15) 0.00053(16) 0.00112(16)  
Fe4 Fe 0.0141(2) 0.0120(2) 0.0129(3) 0.00047(15) -0.00034(16) 0.00152(16)  
Fe5 Fe 0.0179(2) 0.0101(2) 0.0107(3) 0.00151(16) 0.00319(16) 0.00042(16)  
Fe6 Fe 0.0178(2) 0.0099(2) 0.0105(3) -0.00084(16) 0.00317(16) -0.00022(16)  
P1 P 0.0113(3) 0.0090(3) 0.0100(4) 0.0011(3) 0.0019(3) 0.0004(3)  
P2 P 0.0121(3) 0.0091(3) 0.0096(4) -0.0010(3) 0.0021(3) -0.0002(3)  
P3 P 0.0138(3) 0.0090(3) 0.0092(4) -0.0001(3) 0.0012(3) 0.0000(3)  
P4 P 0.0121(3) 0.0094(3) 0.0095(4) 0.0002(3) 0.0015(3) 0.0002(3)  
K1 K 0.0230(4) 0.0238(4) 0.0297(5) 0.0005(3) 0.0063(3) -0.0033(3)  
O1 O 0.0154(10) 0.0125(10) 0.0108(12) 0.0035(8) 0.0019(8) 0.0018(8)  
O2 O 0.0125(9) 0.0132(10) 0.0114(12) 0.0023(8) 0.0008(8) 0.0032(8)  
O3 O 0.0130(10) 0.0129(10) 0.0151(13) 0.0002(8) 0.0030(8) -0.0011(8)  
O4 O 0.0134(9) 0.0125(10) 0.0100(11) -0.0003(8) 0.0028(7) 0.0002(8)  
O5 O 0.0161(10) 0.0125(10) 0.0100(12) -0.0056(8) 0.0021(8) -0.0019(8)  
O6 O 0.0127(9) 0.0133(10) 0.0096(11) -0.0027(8) 0.0015(7) -0.0032(8)  
O7 O 0.0135(9) 0.0121(10) 0.0102(12) 0.0018(8) 0.0019(8) 0.0001(8)  
O8 O 0.0135(10) 0.0118(10) 0.0139(13) 0.0003(8) 0.0034(8) 0.0015(8)  
O9 O 0.0129(10) 0.0149(11) 0.0141(13) 0.0004(8) 0.0013(8) 0.0040(8)  
O10 O 0.0153(10) 0.0094(10) 0.0108(12) 0.0010(8) 0.0031(8) 0.0021(8)  
O11 O 0.0132(9) 0.0110(10) 0.0112(12) -0.0010(8) 0.0010(8) 0.0001(8)  
O12 O 0.0241(11) 0.0101(10) 0.0090(12) 0.0001(8) 0.0030(8) -0.0008(8)  
O13 O 0.0143(9) 0.0112(10) 0.0089(11) 0.0006(8) -0.0002(7) 0.0007(8)  
O14 O 0.0134(10) 0.0143(10) 0.0137(12) -0.0004(8) 0.0016(8) -0.0038(9)  
O15 O 0.0149(10) 0.0093(10) 0.0112(12) -0.0003(8) 0.0028(8) -0.0019(8)  
O16 O 0.0201(10) 0.0102(10) 0.0102(12) 0.0007(8) 0.0024(8) 0.0008(8)  
O17 O 0.0212(11) 0.0084(10) 0.0114(12) 0.0023(8) 0.0029(8) -0.0001(8)  
O18 O 0.0214(11) 0.0095(10) 0.0115(12) -0.0022(8) 0.0031(8) -0.0005(8)  
O19 O 0.0132(9) 0.0174(11) 0.0093(12) -0.0009(8) 0.0018(8) -0.0007(9)  
O20 O 0.0144(10) 0.0115(10) 0.0103(12) -0.0002(8) 0.0005(8) 0.0006(8)  
O21 O 0.0140(10) 0.0126(10) 0.0101(12) -0.0008(8) 0.0006(8) 0.0012(8)

regerite.cif

022 0 0.0139(10) 0.0097(10) 0.0119(13) 0.0002(7) 0.0033(8) -0.0005(7)  
023 0 0.0144(10) 0.0137(10) 0.0112(12) 0.0011(8) 0.0019(8) 0.0010(8)  
024 0 0.0164(11) 0.0265(13) 0.0219(14) -0.0033(10) 0.0012(9) 0.0006(11)  
025 0 0.0148(10) 0.0125(11) 0.0121(12) 0.0019(8) 0.0029(8) 0.0030(8)  
026 0 0.0168(10) 0.0126(10) 0.0145(12) -0.0020(8) 0.0041(8) -0.0028(9)  
027 0 0.0205(12) 0.0336(15) 0.0176(14) 0.0043(11) -0.0006(9) 0.0015(11)  
028 0 0.0150(10) 0.0143(11) 0.0168(13) 0.0003(8) -0.0002(8) -0.0031(9)  
029 0 0.0143(10) 0.0206(12) 0.0211(14) 0.0015(9) 0.0037(9) 0.0085(10)  
030 0 0.0266(13) 0.0272(14) 0.0284(17) 0.0033(11) 0.0003(11) 0.0064(12)  
031 0 0.0162(11) 0.0183(12) 0.0205(15) 0.0005(8) 0.0061(9) -0.0019(9)  
032 0 0.0195(11) 0.0129(11) 0.0154(13) 0.0011(9) 0.0042(9) -0.0008(9)  
033 0 0.0219(12) 0.0231(13) 0.0299(16) 0.0013(10) 0.0025(11) -0.0016(11)

loop\_

\_jana\_atom\_site\_ADP\_C\_label  
\_jana\_atom\_site\_ADP\_C\_type\_symbol  
\_jana\_atom\_site\_ADP\_C\_111  
\_jana\_atom\_site\_ADP\_C\_112  
\_jana\_atom\_site\_ADP\_C\_113  
\_jana\_atom\_site\_ADP\_C\_122  
\_jana\_atom\_site\_ADP\_C\_123  
\_jana\_atom\_site\_ADP\_C\_133  
\_jana\_atom\_site\_ADP\_C\_222  
\_jana\_atom\_site\_ADP\_C\_223  
\_jana\_atom\_site\_ADP\_C\_233  
\_jana\_atom\_site\_ADP\_C\_333  
? ? ? ? ? ? ? ? ? ? ? ?

loop\_

\_jana\_atom\_site\_ADP\_D\_label  
\_jana\_atom\_site\_ADP\_D\_type\_symbol  
\_jana\_atom\_site\_ADP\_D\_1111  
\_jana\_atom\_site\_ADP\_D\_1112  
\_jana\_atom\_site\_ADP\_D\_1113  
\_jana\_atom\_site\_ADP\_D\_1122  
\_jana\_atom\_site\_ADP\_D\_1123  
\_jana\_atom\_site\_ADP\_D\_1133  
\_jana\_atom\_site\_ADP\_D\_1222  
\_jana\_atom\_site\_ADP\_D\_1223  
\_jana\_atom\_site\_ADP\_D\_1233  
\_jana\_atom\_site\_ADP\_D\_1333  
\_jana\_atom\_site\_ADP\_D\_2222  
\_jana\_atom\_site\_ADP\_D\_2223  
\_jana\_atom\_site\_ADP\_D\_2233  
\_jana\_atom\_site\_ADP\_D\_2333  
\_jana\_atom\_site\_ADP\_D\_3333  
? ? ? ? ? ? ? ? ? ? ? ? ? ? ? ?

loop\_

\_jana\_atom\_site\_ADP\_E\_label  
\_jana\_atom\_site\_ADP\_E\_type\_symbol  
\_jana\_atom\_site\_ADP\_E\_11111  
\_jana\_atom\_site\_ADP\_E\_11112  
\_jana\_atom\_site\_ADP\_E\_11113

\_jana\_atom\_site\_ADP\_E\_11122  
\_jana\_atom\_site\_ADP\_E\_11123  
\_jana\_atom\_site\_ADP\_E\_11133  
\_jana\_atom\_site\_ADP\_E\_11222  
\_jana\_atom\_site\_ADP\_E\_11223  
\_jana\_atom\_site\_ADP\_E\_11233  
\_jana\_atom\_site\_ADP\_E\_11333  
\_jana\_atom\_site\_ADP\_E\_12222  
\_jana\_atom\_site\_ADP\_E\_12223  
\_jana\_atom\_site\_ADP\_E\_12233  
\_jana\_atom\_site\_ADP\_E\_12333  
\_jana\_atom\_site\_ADP\_E\_13333  
\_jana\_atom\_site\_ADP\_E\_22222  
\_jana\_atom\_site\_ADP\_E\_22223  
\_jana\_atom\_site\_ADP\_E\_22233  
\_jana\_atom\_site\_ADP\_E\_22333  
\_jana\_atom\_site\_ADP\_E\_23333  
\_jana\_atom\_site\_ADP\_E\_33333  
? ? ? ? ? ? ? ? ? ? ? ? ? ? ? ? ? ? ? ? ? ?

loop\_

\_jana\_atom\_site\_ADP\_F\_label  
\_jana\_atom\_site\_ADP\_F\_type\_symbol  
\_jana\_atom\_site\_ADP\_F\_111111  
\_jana\_atom\_site\_ADP\_F\_111112  
\_jana\_atom\_site\_ADP\_F\_111113  
\_jana\_atom\_site\_ADP\_F\_111122  
\_jana\_atom\_site\_ADP\_F\_111123  
\_jana\_atom\_site\_ADP\_F\_111133  
\_jana\_atom\_site\_ADP\_F\_111222  
\_jana\_atom\_site\_ADP\_F\_111223  
\_jana\_atom\_site\_ADP\_F\_111233  
\_jana\_atom\_site\_ADP\_F\_111333  
\_jana\_atom\_site\_ADP\_F\_112222  
\_jana\_atom\_site\_ADP\_F\_112223  
\_jana\_atom\_site\_ADP\_F\_112233  
\_jana\_atom\_site\_ADP\_F\_112333  
\_jana\_atom\_site\_ADP\_F\_113333  
\_jana\_atom\_site\_ADP\_F\_122222  
\_jana\_atom\_site\_ADP\_F\_122223  
\_jana\_atom\_site\_ADP\_F\_122233  
\_jana\_atom\_site\_ADP\_F\_122333  
\_jana\_atom\_site\_ADP\_F\_123333  
\_jana\_atom\_site\_ADP\_F\_133333  
\_jana\_atom\_site\_ADP\_F\_222222  
\_jana\_atom\_site\_ADP\_F\_222223  
\_jana\_atom\_site\_ADP\_F\_222233  
\_jana\_atom\_site\_ADP\_F\_222333  
\_jana\_atom\_site\_ADP\_F\_223333  
\_jana\_atom\_site\_ADP\_F\_233333  
\_jana\_atom\_site\_ADP\_F\_333333  
? ? ? ? ? ? ? ? ? ? ? ? ? ? ? ? ? ? ? ? ? ? ? ? ? ? ? ?

#=====

## # 10. MOLECULAR GEOMETRY

loop\_

\_geom\_bond\_atom\_site\_label\_1  
\_geom\_bond\_atom\_site\_label\_2  
\_geom\_bond\_site\_symmetry\_1  
\_geom\_bond\_site\_symmetry\_2  
\_geom\_bond\_distance  
\_geom\_bond\_publ\_flag  
Fe1 Fe5 . 3\_667 3.5981(16) ?  
Fe1 P2 . . 3.2314(17) ?  
Fe1 P2 . 3\_667 3.2141(13) ?  
Fe1 P4 . 1\_556 3.3113(14) ?  
Fe1 K1 . . 3.5120(17) ?  
Fe1 K1 . 3\_668 4.472(2) ?  
Fe1 O6 . . 1.967(2) ?  
Fe1 O8 . 3\_667 1.968(2) ?  
Fe1 O16 . 1\_556 2.004(2) ?  
Fe1 O17 . . 1.953(2) ?  
Fe1 O24 . . 2.082(3) ?  
Fe1 O25 . . 2.120(2) ?  
Fe1 H24b . . 2.17(4) ?  
Fe1 H25a . . 2.46(4) ?  
Fe1 H25b . . 2.40(4) ?  
Fe1 H17 . . 2.45(5) ?  
Fe2 Fe6 . 3\_565 3.5900(16) ?  
Fe2 P1 . . 3.2035(16) ?  
Fe2 P1 . 3\_565 3.2180(13) ?  
Fe2 P3 . 1\_554 3.2802(14) ?  
Fe2 K1 . 3\_566 4.595(2) ?  
Fe2 O2 . . 1.931(2) ?  
Fe2 O3 . 3\_565 1.976(3) ?  
Fe2 O12 . 1\_554 1.984(2) ?  
Fe2 O18 . . 1.950(2) ?  
Fe2 O26 . . 2.132(2) ?  
Fe2 O27 . . 2.190(3) ?  
Fe2 H26a . . 2.50(4) ?  
Fe2 H27a . . 2.03(5) ?  
Fe2 H26b . . 2.47(4) ?  
Fe2 H18 . . 2.38(5) ?  
Fe3 Fe4 . . 3.0848(17) ?  
Fe3 Fe4 . 4\_555 3.7655(17) ?  
Fe3 Fe5 . 4\_554 3.5955(14) ?  
Fe3 P2 . 4\_554 3.1949(14) ?  
Fe3 P4 . . 3.3085(15) ?  
Fe3 K1 . 1\_554 3.751(2) ?  
Fe3 O5 . 4\_554 1.995(2) ?  
Fe3 O14 . . 1.983(2) ?  
Fe3 O19 . 4\_554 2.002(3) ?  
Fe3 O20 . . 2.019(2) ?  
Fe3 O21 . . 2.031(2) ?

Fe3 O22 . 4\_555 2.037(2) ?  
Fe3 H20 . . 2.41(5) ?  
Fe3 H21 . . 2.53(5) ?  
Fe3 H19 . 4\_554 2.56(4) ?  
Fe4 Fe6 . . 3.6397(14) ?  
Fe4 P1 . . 3.1979(14) ?  
Fe4 P3 . 4\_554 3.3061(15) ?  
Fe4 K1 . 1\_554 4.6021(18) ?  
Fe4 O1 . . 1.973(2) ?  
Fe4 O9 . 4\_554 1.988(2) ?  
Fe4 O20 . . 2.008(2) ?  
Fe4 O21 . . 2.017(2) ?  
Fe4 O22 . . 2.011(2) ?  
Fe4 O23 . . 2.054(3) ?  
Fe4 H20 . . 2.53(5) ?  
Fe4 H21 . . 2.38(5) ?  
Fe4 H23 . . 2.46(4) ?  
Fe5 P2 . . 3.1340(15) ?  
Fe5 P4 . . 3.1727(16) ?  
Fe5 P4 . 4\_555 3.2267(14) ?  
Fe5 K1 . 1\_554 5.210(2) ?  
Fe5 K1 . 3\_667 4.4343(18) ?  
Fe5 O7 . . 1.968(2) ?  
Fe5 O13 . . 1.956(2) ?  
Fe5 O15 . 4\_555 2.001(2) ?  
Fe5 O17 . 3\_667 2.017(2) ?  
Fe5 O19 . . 1.959(2) ?  
Fe5 O28 . . 2.163(2) ?  
Fe5 H19 . . 2.24(5) ?  
Fe5 H17 . 3\_667 2.28(4) ?  
Fe6 P1 . . 3.1444(15) ?  
Fe6 P3 . . 3.2018(16) ?  
Fe6 P3 . 4\_554 3.2461(15) ?  
Fe6 O4 . . 1.970(2) ?  
Fe6 O10 . 4\_554 2.019(2) ?  
Fe6 O11 . . 1.975(2) ?  
Fe6 O18 . 3\_565 2.033(2) ?  
Fe6 O23 . . 1.985(2) ?  
Fe6 O29 . . 2.106(2) ?  
Fe6 H18 . 3\_565 2.43(5) ?  
Fe6 H23 . . 2.37(5) ?  
P1 O1 . . 1.530(2) ?  
P1 O2 . . 1.533(2) ?  
P1 O3 . . 1.539(2) ?  
P1 O4 . . 1.542(2) ?  
P2 K1 . . 3.881(2) ?  
P2 O5 . . 1.533(2) ?  
P2 O6 . . 1.533(2) ?  
P2 O7 . . 1.540(2) ?  
P2 O8 . . 1.544(2) ?  
P3 O9 . . 1.522(2) ?  
P3 O10 . . 1.539(2) ?  
P3 O11 . . 1.547(2) ?  
P3 O12 . . 1.554(2) ?



P4 K1 . 1\_554 3.5461(16) ?  
P4 K1 . 3\_667 4.979(2) ?  
P4 O13 . . 1.534(2) ?  
P4 O14 . . 1.532(2) ?  
P4 O15 . . 1.535(2) ?  
P4 O16 . . 1.548(2) ?  
K1 K1 . 3\_668 5.855(3) ?  
K1 O5 . . 3.899(3) ?  
K1 O6 . . 2.719(3) ?  
K1 O14 . 1\_556 2.842(3) ?  
K1 O16 . 1\_556 2.990(3) ?  
K1 O16 . 3\_667 3.949(3) ?  
K1 O17 . . 2.986(3) ?  
K1 O17 . 3\_668 4.122(3) ?  
K1 O21 . 1\_556 2.761(3) ?  
K1 O22 . 4\_556 3.714(3) ?  
K1 O24 . 3\_668 2.966(3) ?  
K1 O27 . 3\_566 2.848(3) ?  
K1 O28 . 3\_667 3.646(3) ?  
K1 O30 . 3\_668 3.149(3) ?  
K1 O31 . . 3.783(3) ?  
K1 H28a . 3\_667 3.38(4) ?  
K1 H27a . 3\_566 2.82(5) ?  
K1 H24a . 3\_668 3.27(5) ?  
K1 H31a . . 3.48(4) ?  
K1 H21 . 1\_556 2.80(5) ?  
K1 H24b . 3\_668 2.87(5) ?  
K1 H31b . . 3.93(4) ?  
K1 H30a . 3\_668 3.56(5) ?  
K1 H27b . 3\_566 3.09(5) ?  
K1 H19 . 1\_556 4.05(4) ?  
K1 H17 . . 3.21(5) ?  
K1 H17 . 3\_668 3.44(4) ?  
O17 H17 . . 0.84(3) ?  
O18 H18 . . 0.85(2) ?  
O19 H19 . . 0.82(2) ?  
O20 H20 . . 0.84(5) ?  
O21 H21 . . 0.83(5) ?  
O23 H23 . . 0.81(3) ?  
O24 H24a . . 0.85(3) ?  
O24 H24b . . 0.84(3) ?  
O25 H25a . . 0.84(4) ?  
O25 H25b . . 0.84(3) ?  
O26 H26a . . 0.84(4) ?  
O26 H26b . . 0.85(3) ?  
O27 H27a . . 0.83(3) ?  
O27 H27b . . 0.84(2) ?  
O28 H28a . . 0.83(4) ?  
O28 H28b . . 0.84(4) ?  
O29 H29a . . 0.85(4) ?  
O29 H29b . . 0.84(4) ?  
O30 H30a . . 0.84(4) ?  
O31 H31a . . 0.84(4) ?  
O31 H31b . . 0.84(4) ?

O32 H32a . . 0.76(3) ?  
O32 H32b . . 0.77(4) ?  
O33 H33a . . 0.88(3) ?  
O33 H33b . . 0.85(3) ?  
H32a H32b . . 1.25(5) ?

loop\_

\_geom\_angle\_atom\_site\_label\_1  
\_geom\_angle\_atom\_site\_label\_2  
\_geom\_angle\_atom\_site\_label\_3  
\_geom\_angle\_site\_symmetry\_1  
\_geom\_angle\_site\_symmetry\_2  
\_geom\_angle\_site\_symmetry\_3  
\_geom\_angle  
\_geom\_angle\_publ\_flag  
Fe5 Fe1 P2 3\_667 . . 97.47(2) ?  
Fe5 Fe1 P2 3\_667 . 3\_667 54.43(2) ?  
Fe5 Fe1 P4 3\_667 . 1\_556 131.94(2) ?  
Fe5 Fe1 K1 3\_667 . . 77.16(2) ?  
Fe5 Fe1 K1 3\_667 . 3\_668 79.62(2) ?  
Fe5 Fe1 O6 3\_667 . . 90.21(7) ?  
Fe5 Fe1 O8 3\_667 . 3\_667 71.37(7) ?  
Fe5 Fe1 O16 3\_667 . 1\_556 116.10(7) ?  
Fe5 Fe1 O17 3\_667 . . 25.43(7) ?  
Fe5 Fe1 O24 3\_667 . . 95.17(8) ?  
Fe5 Fe1 O25 3\_667 . . 154.94(7) ?  
Fe5 Fe1 H24b 3\_667 . . 72.8(8) ?  
Fe5 Fe1 H25a 3\_667 . . 172.4(9) ?  
Fe5 Fe1 H25b 3\_667 . . 139.7(9) ?  
Fe5 Fe1 H17 3\_667 . . 38.7(9) ?  
P2 Fe1 P2 . . 3\_667 75.29(3) ?  
P2 Fe1 P4 . . 1\_556 92.63(3) ?  
P2 Fe1 K1 . . . 70.13(3) ?  
P2 Fe1 K1 . . 3\_668 163.61(3) ?  
P2 Fe1 O6 . . . 19.81(7) ?  
P2 Fe1 O8 . . 3\_667 82.73(7) ?  
P2 Fe1 O16 . . 1\_556 106.12(7) ?  
P2 Fe1 O17 . . . 103.71(7) ?  
P2 Fe1 O24 . . . 161.59(8) ?  
P2 Fe1 O25 . . . 75.14(6) ?  
P2 Fe1 H24b . . . 161.6(12) ?  
P2 Fe1 H25a . . . 76.2(10) ?  
P2 Fe1 H25b . . . 56.7(10) ?  
P2 Fe1 H17 . . . 119.3(11) ?  
P2 Fe1 P4 3\_667 . 1\_556 167.56(3) ?  
P2 Fe1 K1 3\_667 . . 114.59(3) ?  
P2 Fe1 K1 3\_667 . 3\_668 114.47(3) ?  
P2 Fe1 O6 3\_667 . . 85.54(7) ?  
P2 Fe1 O8 3\_667 . 3\_667 20.88(7) ?  
P2 Fe1 O16 3\_667 . 1\_556 170.37(7) ?  
P2 Fe1 O17 3\_667 . . 79.67(7) ?  
P2 Fe1 O24 3\_667 . . 101.71(8) ?  
P2 Fe1 O25 3\_667 . . 100.59(7) ?  
P2 Fe1 H24b 3\_667 . . 86.4(12) ?

P2 Fe1 H25a 3\_667 . . 119.0(9) ?  
P2 Fe1 H25b 3\_667 . . 87.2(9) ?  
P2 Fe1 H17 3\_667 . . 92.2(10) ?  
P4 Fe1 K1 1\_556 . . 62.54(3) ?  
P4 Fe1 K1 1\_556 . 3\_668 77.98(2) ?  
P4 Fe1 O6 1\_556 . . 83.84(7) ?  
P4 Fe1 O8 1\_556 . 3\_667 156.70(7) ?  
P4 Fe1 O16 1\_556 . 1\_556 18.54(7) ?  
P4 Fe1 O17 1\_556 . . 106.61(8) ?  
P4 Fe1 O24 1\_556 . . 88.79(8) ?  
P4 Fe1 O25 1\_556 . . 72.89(7) ?  
P4 Fe1 H24b 1\_556 . . 105.5(12) ?  
P4 Fe1 H25a 1\_556 . . 53.6(10) ?  
P4 Fe1 H25b 1\_556 . . 83.5(10) ?  
P4 Fe1 H17 1\_556 . . 96.4(11) ?  
K1 Fe1 K1 . . 3\_668 93.55(3) ?  
K1 Fe1 O6 . . . 50.38(7) ?  
K1 Fe1 O8 . . 3\_667 134.92(7) ?  
K1 Fe1 O16 . . 1\_556 58.23(7) ?  
K1 Fe1 O17 . . . 58.18(7) ?  
K1 Fe1 O24 . . . 126.05(8) ?  
K1 Fe1 O25 . . . 120.63(6) ?  
K1 Fe1 H24b . . . 120.8(13) ?  
K1 Fe1 H25a . . . 104.3(11) ?  
K1 Fe1 H25b . . . 114.5(11) ?  
K1 Fe1 H17 . . . 62.1(12) ?  
K1 Fe1 O6 3\_668 . . 143.93(7) ?  
K1 Fe1 O8 3\_668 . 3\_667 111.11(7) ?  
K1 Fe1 O16 3\_668 . 1\_556 61.99(7) ?  
K1 Fe1 O17 3\_668 . . 67.01(7) ?  
K1 Fe1 O24 3\_668 . . 33.45(8) ?  
K1 Fe1 O25 3\_668 . . 113.95(6) ?  
K1 Fe1 H24b 3\_668 . . 32.0(14) ?  
K1 Fe1 H25a 3\_668 . . 107.7(9) ?  
K1 Fe1 H25b 3\_668 . . 133.9(9) ?  
K1 Fe1 H17 3\_668 . . 49.8(10) ?  
O6 Fe1 O8 . . 3\_667 97.81(10) ?  
O6 Fe1 O16 . . 1\_556 93.15(10) ?  
O6 Fe1 O17 . . . 89.26(10) ?  
O6 Fe1 O24 . . . 172.61(10) ?  
O6 Fe1 O25 . . . 89.47(9) ?  
O6 Fe1 H24b . . . 162.8(8) ?  
O6 Fe1 H25a . . . 85.2(10) ?  
O6 Fe1 H25b . . . 73.3(11) ?  
O6 Fe1 H17 . . . 102.7(11) ?  
O8 Fe1 O16 3\_667 . 1\_556 166.80(9) ?  
O8 Fe1 O17 3\_667 . . 96.67(10) ?  
O8 Fe1 O24 3\_667 . . 88.72(10) ?  
O8 Fe1 O25 3\_667 . . 83.86(9) ?  
O8 Fe1 H24b 3\_667 . . 79.4(13) ?  
O8 Fe1 H25a 3\_667 . . 103.2(10) ?  
O8 Fe1 H25b 3\_667 . . 74.8(10) ?  
O8 Fe1 H17 3\_667 . . 105.8(11) ?  
O16 Fe1 O17 1\_556 . . 90.77(10) ?

016 Fe1 O24 1\_556 . . 79.94(10) ?  
016 Fe1 O25 1\_556 . . 88.93(9) ?  
016 Fe1 H24b 1\_556 . . 92.2(13) ?  
016 Fe1 H25a 1\_556 . . 70.3(10) ?  
016 Fe1 H25b 1\_556 . . 101.6(9) ?  
016 Fe1 H17 1\_556 . . 78.7(10) ?  
017 Fe1 O24 . . . 93.42(10) ?  
017 Fe1 O25 . . . 178.68(9) ?  
017 Fe1 H24b . . . 74.3(10) ?  
017 Fe1 H25a . . . 159.9(11) ?  
017 Fe1 H25b . . . 159.0(9) ?  
017 Fe1 H17 . . . 17.7(9) ?  
024 Fe1 O25 . . . 87.80(10) ?  
024 Fe1 H24b . . . 22.5(8) ?  
024 Fe1 H25a . . . 90.0(10) ?  
024 Fe1 H25b . . . 105.4(10) ?  
024 Fe1 H17 . . . 78.7(11) ?  
025 Fe1 H24b . . . 107.0(10) ?  
025 Fe1 H25a . . . 19.4(10) ?  
025 Fe1 H25b . . . 20.2(9) ?  
025 Fe1 H17 . . . 163.1(9) ?  
H24b Fe1 H25a . . . 112.0(13) ?  
H24b Fe1 H25b . . . 121.5(16) ?  
H24b Fe1 H17 . . . 62.5(16) ?  
H25a Fe1 H25b . . . 32.8(12) ?  
H25a Fe1 H17 . . . 148.5(13) ?  
H25b Fe1 H17 . . . 175.9(15) ?  
Fe6 Fe2 P1 3\_565 . . 97.65(2) ?  
Fe6 Fe2 P1 3\_565 . 3\_565 54.68(2) ?  
Fe6 Fe2 P3 3\_565 . 1\_554 134.26(3) ?  
Fe6 Fe2 K1 3\_565 . 3\_566 96.815(19) ?  
Fe6 Fe2 O2 3\_565 . . 92.17(7) ?  
Fe6 Fe2 O3 3\_565 . 3\_565 72.37(7) ?  
Fe6 Fe2 O12 3\_565 . 1\_554 121.72(7) ?  
Fe6 Fe2 O18 3\_565 . . 26.25(7) ?  
Fe6 Fe2 O26 3\_565 . . 154.29(7) ?  
Fe6 Fe2 O27 3\_565 . . 79.91(8) ?  
Fe6 Fe2 H26a 3\_565 . . 172.6(9) ?  
Fe6 Fe2 H27a 3\_565 . . 102.1(8) ?  
Fe6 Fe2 H26b 3\_565 . . 140.3(8) ?  
Fe6 Fe2 H18 3\_565 . . 42.4(10) ?  
P1 Fe2 P1 . . 3\_565 73.48(3) ?  
P1 Fe2 P3 . . 1\_554 93.03(3) ?  
P1 Fe2 K1 . . 3\_566 135.32(3) ?  
P1 Fe2 O2 . . . 19.80(7) ?  
P1 Fe2 O3 . . 3\_565 78.91(7) ?  
P1 Fe2 O12 . . 1\_554 111.11(7) ?  
P1 Fe2 O18 . . . 102.79(7) ?  
P1 Fe2 O26 . . . 75.64(7) ?  
P1 Fe2 O27 . . . 159.87(8) ?  
P1 Fe2 H26a . . . 77.8(10) ?  
P1 Fe2 H27a . . . 151.8(12) ?  
P1 Fe2 H26b . . . 57.5(10) ?  
P1 Fe2 H18 . . . 117.9(11) ?

P1 Fe2 P3 3\_565 . 1\_554 165.64(3) ?  
P1 Fe2 K1 3\_565 . 3\_566 81.22(3) ?  
P1 Fe2 O2 3\_565 . . 85.20(7) ?  
P1 Fe2 O3 3\_565 . 3\_565 20.78(7) ?  
P1 Fe2 O12 3\_565 . 1\_554 175.01(7) ?  
P1 Fe2 O18 3\_565 . . 80.39(8) ?  
P1 Fe2 O26 3\_565 . . 99.87(7) ?  
P1 Fe2 O27 3\_565 . . 89.26(8) ?  
P1 Fe2 H26a 3\_565 . . 118.0(9) ?  
P1 Fe2 H27a 3\_565 . . 101.9(10) ?  
P1 Fe2 H26b 3\_565 . . 86.9(8) ?  
P1 Fe2 H18 3\_565 . . 96.8(11) ?  
P3 Fe2 K1 1\_554 . 3\_566 106.18(3) ?  
P3 Fe2 O2 1\_554 . . 83.30(7) ?  
P3 Fe2 O3 1\_554 . 3\_565 153.30(7) ?  
P3 Fe2 O12 1\_554 . 1\_554 19.35(7) ?  
P3 Fe2 O18 1\_554 . . 108.01(8) ?  
P3 Fe2 O26 1\_554 . . 71.37(7) ?  
P3 Fe2 O27 1\_554 . . 103.01(8) ?  
P3 Fe2 H26a 1\_554 . . 52.5(10) ?  
P3 Fe2 H27a 1\_554 . . 87.6(9) ?  
P3 Fe2 H26b 1\_554 . . 81.5(9) ?  
P3 Fe2 H18 1\_554 . . 93.9(11) ?  
K1 Fe2 O2 3\_566 . . 155.08(8) ?  
K1 Fe2 O3 3\_566 . 3\_565 65.79(7) ?  
K1 Fe2 O12 3\_566 . 1\_554 96.26(7) ?  
K1 Fe2 O18 3\_566 . . 108.60(7) ?  
K1 Fe2 O26 3\_566 . . 73.18(6) ?  
K1 Fe2 O27 3\_566 . . 27.80(8) ?  
K1 Fe2 H26a 3\_566 . . 82.6(11) ?  
K1 Fe2 H27a 3\_566 . . 22.4(12) ?  
K1 Fe2 H26b 3\_566 . . 85.4(11) ?  
K1 Fe2 H18 3\_566 . . 100.9(13) ?  
O2 Fe2 O3 . . 3\_565 95.26(10) ?  
O2 Fe2 O12 . . 1\_554 98.67(10) ?  
O2 Fe2 O18 . . . 89.45(10) ?  
O2 Fe2 O26 . . . 88.82(9) ?  
O2 Fe2 O27 . . . 171.99(10) ?  
O2 Fe2 H26a . . . 85.5(11) ?  
O2 Fe2 H27a . . . 165.7(8) ?  
O2 Fe2 H26b . . . 73.0(11) ?  
O2 Fe2 H18 . . . 101.4(12) ?  
O3 Fe2 O12 3\_565 . 1\_554 159.54(10) ?  
O3 Fe2 O18 3\_565 . . 98.62(10) ?  
O3 Fe2 O26 3\_565 . . 81.95(10) ?  
O3 Fe2 O27 3\_565 . . 81.34(10) ?  
O3 Fe2 H26a 3\_565 . . 100.8(10) ?  
O3 Fe2 H27a 3\_565 . . 88.0(12) ?  
O3 Fe2 H26b 3\_565 . . 72.6(9) ?  
O3 Fe2 H18 3\_565 . . 112.5(12) ?  
O12 Fe2 O18 1\_554 . . 96.44(10) ?  
O12 Fe2 O26 1\_554 . . 83.42(10) ?  
O12 Fe2 O27 1\_554 . . 86.57(10) ?  
O12 Fe2 H26a 1\_554 . . 65.7(9) ?

012 Fe2 H27a 1\_554 . . 75.0(11) ?  
012 Fe2 H26b 1\_554 . . 97.2(8) ?  
012 Fe2 H18 1\_554 . . 79.4(10) ?  
018 Fe2 O26 . . . 178.22(9) ?  
018 Fe2 O27 . . . 83.93(10) ?  
018 Fe2 H26a . . . 160.3(11) ?  
018 Fe2 H27a . . . 103.8(10) ?  
018 Fe2 H26b . . . 159.2(9) ?  
018 Fe2 H18 . . . 19.5(9) ?  
026 Fe2 O27 . . . 97.83(10) ?  
026 Fe2 H26a . . . 18.9(10) ?  
026 Fe2 H27a . . . 77.9(10) ?  
026 Fe2 H26b . . . 19.6(9) ?  
026 Fe2 H18 . . . 161.1(9) ?  
027 Fe2 H26a . . . 102.2(11) ?  
027 Fe2 H27a . . . 22.1(8) ?  
027 Fe2 H26b . . . 112.5(11) ?  
027 Fe2 H18 . . . 73.5(12) ?  
H26a Fe2 H27a . . . 80.3(13) ?  
H26a Fe2 H26b . . . 32.3(12) ?  
H26a Fe2 H18 . . . 145.1(14) ?  
H27a Fe2 H26b . . . 94.8(15) ?  
H27a Fe2 H18 . . . 90.1(16) ?  
H26b Fe2 H18 . . . 173.0(18) ?  
Fe4 Fe3 Fe4 . . 4\_555 92.08(3) ?  
Fe4 Fe3 Fe5 . . 4\_554 117.85(3) ?  
Fe4 Fe3 P2 . . 4\_554 135.54(2) ?  
Fe4 Fe3 P4 . . . 135.07(3) ?  
Fe4 Fe3 K1 . . 1\_554 84.030(19) ?  
Fe4 Fe3 O5 . . 4\_554 134.39(7) ?  
Fe4 Fe3 O14 . . . 130.90(7) ?  
Fe4 Fe3 O19 . . 4\_554 93.69(7) ?  
Fe4 Fe3 O20 . . . 39.87(7) ?  
Fe4 Fe3 O21 . . . 40.18(6) ?  
Fe4 Fe3 O22 . . 4\_555 89.62(6) ?  
Fe4 Fe3 H20 . . . 53.2(11) ?  
Fe4 Fe3 H21 . . . 48.8(11) ?  
Fe4 Fe3 H19 . . 4\_554 79.7(11) ?  
Fe4 Fe3 Fe5 4\_555 . 4\_554 145.76(3) ?  
Fe4 Fe3 P2 4\_555 . 4\_554 92.79(3) ?  
Fe4 Fe3 P4 4\_555 . . 114.99(3) ?  
Fe4 Fe3 K1 4\_555 . 1\_554 94.547(19) ?  
Fe4 Fe3 O5 4\_555 . 4\_554 71.01(7) ?  
Fe4 Fe3 O14 4\_555 . . 100.93(8) ?  
Fe4 Fe3 O19 4\_555 . 4\_554 157.60(7) ?  
Fe4 Fe3 O20 4\_555 . . 77.21(7) ?  
Fe4 Fe3 O21 4\_555 . . 105.12(7) ?  
Fe4 Fe3 O22 4\_555 . 4\_555 21.39(7) ?  
Fe4 Fe3 H20 4\_555 . . 58.7(11) ?  
Fe4 Fe3 H21 4\_555 . . 121.5(12) ?  
Fe4 Fe3 H19 4\_555 . 4\_554 162.8(12) ?  
Fe5 Fe3 P2 4\_554 . 4\_554 54.59(2) ?  
Fe5 Fe3 P4 4\_554 . . 55.54(2) ?  
Fe5 Fe3 K1 4\_554 . 1\_554 104.22(2) ?

Fe5 Fe3 O5 4\_554 . 4\_554 75.88(7) ?  
Fe5 Fe3 O14 4\_554 . . 72.81(7) ?  
Fe5 Fe3 O19 4\_554 . 4\_554 24.51(7) ?  
Fe5 Fe3 O20 4\_554 . . 114.45(7) ?  
Fe5 Fe3 O21 4\_554 . . 108.55(7) ?  
Fe5 Fe3 O22 4\_554 . 4\_555 152.27(6) ?  
Fe5 Fe3 H20 4\_554 . . 125.6(12) ?  
Fe5 Fe3 H21 4\_554 . . 91.9(12) ?  
Fe5 Fe3 H19 4\_554 . 4\_554 38.2(11) ?  
P2 Fe3 P4 4\_554 . . 80.86(3) ?  
P2 Fe3 K1 4\_554 . 1\_554 139.40(2) ?  
P2 Fe3 O5 4\_554 . 4\_554 21.79(7) ?  
P2 Fe3 O14 4\_554 . . 91.24(7) ?  
P2 Fe3 O19 4\_554 . 4\_554 68.19(7) ?  
P2 Fe3 O20 4\_554 . . 98.92(7) ?  
P2 Fe3 O21 4\_554 . . 161.24(7) ?  
P2 Fe3 O22 4\_554 . 4\_555 109.07(7) ?  
P2 Fe3 H20 4\_554 . . 93.3(12) ?  
P2 Fe3 H21 4\_554 . . 145.6(12) ?  
P2 Fe3 H19 4\_554 . 4\_554 82.9(11) ?  
P4 Fe3 K1 . . 1\_554 59.92(2) ?  
P4 Fe3 O5 . . 4\_554 89.60(7) ?  
P4 Fe3 O14 . . . 17.27(7) ?  
P4 Fe3 O19 . . 4\_554 74.89(7) ?  
P4 Fe3 O20 . . . 167.80(8) ?  
P4 Fe3 O21 . . . 96.21(7) ?  
P4 Fe3 O22 . . 4\_555 102.99(7) ?  
P4 Fe3 H20 . . . 171.4(10) ?  
P4 Fe3 H21 . . . 86.2(11) ?  
P4 Fe3 H19 . . 4\_554 80.9(12) ?  
K1 Fe3 O5 1\_554 . 4\_554 137.60(7) ?  
K1 Fe3 O14 1\_554 . . 48.16(7) ?  
K1 Fe3 O19 1\_554 . 4\_554 107.56(7) ?  
K1 Fe3 O20 1\_554 . . 121.65(7) ?  
K1 Fe3 O21 1\_554 . . 46.08(7) ?  
K1 Fe3 O22 1\_554 . 4\_555 73.15(7) ?  
K1 Fe3 H20 1\_554 . . 124.3(13) ?  
K1 Fe3 H21 1\_554 . . 48.3(11) ?  
K1 Fe3 H19 1\_554 . 4\_554 99.6(12) ?  
O5 Fe3 O14 4\_554 . . 94.37(9) ?  
O5 Fe3 O19 4\_554 . 4\_554 89.69(10) ?  
O5 Fe3 O20 4\_554 . . 94.54(9) ?  
O5 Fe3 O21 4\_554 . . 174.03(9) ?  
O5 Fe3 O22 4\_554 . 4\_555 87.71(9) ?  
O5 Fe3 H20 4\_554 . . 82.8(11) ?  
O5 Fe3 H21 4\_554 . . 167.3(12) ?  
O5 Fe3 H19 4\_554 . 4\_554 104.0(11) ?  
O14 Fe3 O19 . . 4\_554 91.53(10) ?  
O14 Fe3 O20 . . . 169.72(9) ?  
O14 Fe3 O21 . . . 90.82(9) ?  
O14 Fe3 O22 . . 4\_555 86.59(9) ?  
O14 Fe3 H20 . . . 159.3(11) ?  
O14 Fe3 H21 . . . 85.2(11) ?  
O14 Fe3 H19 . . 4\_554 95.8(12) ?

019 Fe3 O20 4\_554 . . 93.63(10) ?  
019 Fe3 O21 4\_554 . . 93.12(10) ?  
019 Fe3 O22 4\_554 . 4\_555 176.67(9) ?  
019 Fe3 H20 4\_554 . . 108.9(12) ?  
019 Fe3 H21 4\_554 . . 77.7(12) ?  
019 Fe3 H19 4\_554 . 4\_554 15.3(11) ?  
020 Fe3 O21 . . . 80.04(9) ?  
020 Fe3 O22 . . 4\_555 88.65(9) ?  
020 Fe3 H20 . . . 19.4(10) ?  
020 Fe3 H21 . . . 87.3(11) ?  
020 Fe3 H19 . . 4\_554 87.0(12) ?  
021 Fe3 O22 . . 4\_555 89.67(9) ?  
021 Fe3 H20 . . . 91.3(11) ?  
021 Fe3 H21 . . . 16.6(12) ?  
021 Fe3 H19 . . 4\_554 78.4(11) ?  
022 Fe3 H20 4\_555 . . 72.9(11) ?  
022 Fe3 H21 4\_555 . . 104.9(12) ?  
022 Fe3 H19 4\_555 . 4\_554 167.8(11) ?  
H20 Fe3 H21 . . . 102.0(16) ?  
H20 Fe3 H19 . . 4\_554 104.7(16) ?  
H21 Fe3 H19 . . 4\_554 63.6(16) ?  
Fe3 Fe4 Fe3 . . 4\_554 92.37(3) ?  
Fe3 Fe4 Fe6 . . . 118.53(3) ?  
Fe3 Fe4 P1 . . . 135.06(2) ?  
Fe3 Fe4 P3 . . 4\_554 135.64(3) ?  
Fe3 Fe4 K1 . . 1\_554 54.16(2) ?  
Fe3 Fe4 O1 . . . 135.35(7) ?  
Fe3 Fe4 O9 . . 4\_554 131.40(7) ?  
Fe3 Fe4 O20 . . . 40.12(6) ?  
Fe3 Fe4 O21 . . . 40.54(7) ?  
Fe3 Fe4 O22 . . . 89.18(6) ?  
Fe3 Fe4 O23 . . . 93.86(7) ?  
Fe3 Fe4 H20 . . . 49.6(11) ?  
Fe3 Fe4 H21 . . . 53.4(11) ?  
Fe3 Fe4 H23 . . . 78.6(11) ?  
Fe3 Fe4 Fe6 4\_554 . . 143.19(3) ?  
Fe3 Fe4 P1 4\_554 . . 90.07(3) ?  
Fe3 Fe4 P3 4\_554 . 4\_554 116.18(3) ?  
Fe3 Fe4 K1 4\_554 . 1\_554 86.05(2) ?  
Fe3 Fe4 O1 4\_554 . . 69.25(7) ?  
Fe3 Fe4 O9 4\_554 . 4\_554 102.86(8) ?  
Fe3 Fe4 O20 4\_554 . . 107.77(7) ?  
Fe3 Fe4 O21 4\_554 . . 76.89(7) ?  
Fe3 Fe4 O22 4\_554 . . 21.69(7) ?  
Fe3 Fe4 O23 4\_554 . . 152.99(7) ?  
Fe3 Fe4 H20 4\_554 . . 124.3(11) ?  
Fe3 Fe4 H21 4\_554 . . 58.0(11) ?  
Fe3 Fe4 H23 4\_554 . . 161.3(13) ?  
Fe6 Fe4 P1 . . . 54.29(2) ?  
Fe6 Fe4 P3 . . 4\_554 55.47(2) ?  
Fe6 Fe4 K1 . . 1\_554 95.99(2) ?  
Fe6 Fe4 O1 . . . 74.48(7) ?  
Fe6 Fe4 O9 . . 4\_554 72.53(7) ?  
Fe6 Fe4 O20 . . . 108.83(7) ?



Fe6 Fe4 O21 . . . 112.88(7) ?  
Fe6 Fe4 O22 . . . 152.29(6) ?  
Fe6 Fe4 O23 . . . 25.21(6) ?  
Fe6 Fe4 H20 . . . 92.1(11) ?  
Fe6 Fe4 H21 . . . 124.1(13) ?  
Fe6 Fe4 H23 . . . 40.2(11) ?  
P1 Fe4 P3 . . 4\_554 81.04(3) ?  
P1 Fe4 K1 . . 1\_554 81.31(3) ?  
P1 Fe4 O1 . . . 21.04(7) ?  
P1 Fe4 O9 . . 4\_554 91.34(7) ?  
P1 Fe4 O20 . . . 160.84(7) ?  
P1 Fe4 O21 . . . 97.17(7) ?  
P1 Fe4 O22 . . . 107.26(7) ?  
P1 Fe4 O23 . . . 67.24(7) ?  
P1 Fe4 H20 . . . 145.4(11) ?  
P1 Fe4 H21 . . . 91.7(13) ?  
P1 Fe4 H23 . . . 85.1(12) ?  
P3 Fe4 K1 4\_554 . 1\_554 151.46(3) ?  
P3 Fe4 O1 4\_554 . . 88.07(7) ?  
P3 Fe4 O9 4\_554 . 4\_554 17.06(7) ?  
P3 Fe4 O20 4\_554 . . 96.68(7) ?  
P3 Fe4 O21 4\_554 . . 166.70(8) ?  
P3 Fe4 O22 4\_554 . . 105.05(7) ?  
P3 Fe4 O23 4\_554 . . 76.05(7) ?  
P3 Fe4 H20 4\_554 . . 86.0(11) ?  
P3 Fe4 H21 4\_554 . . 170.9(11) ?  
P3 Fe4 H23 4\_554 . . 81.0(12) ?  
K1 Fe4 O1 1\_554 . . 83.38(7) ?  
K1 Fe4 O9 1\_554 . 4\_554 168.52(7) ?  
K1 Fe4 O20 1\_554 . . 92.73(7) ?  
K1 Fe4 O21 1\_554 . . 18.33(7) ?  
K1 Fe4 O22 1\_554 . . 101.51(7) ?  
K1 Fe4 O23 1\_554 . . 76.51(7) ?  
K1 Fe4 H20 1\_554 . . 96.1(11) ?  
K1 Fe4 H21 1\_554 . . 29.8(12) ?  
K1 Fe4 H23 1\_554 . . 75.3(13) ?  
O1 Fe4 O9 . . 4\_554 92.95(10) ?  
O1 Fe4 O20 . . . 175.19(9) ?  
O1 Fe4 O21 . . . 94.89(9) ?  
O1 Fe4 O22 . . . 86.30(10) ?  
O1 Fe4 O23 . . . 88.15(10) ?  
O1 Fe4 H20 . . . 166.4(11) ?  
O1 Fe4 H21 . . . 83.3(12) ?  
O1 Fe4 H23 . . . 105.8(12) ?  
O9 Fe4 O20 4\_554 . . 91.41(9) ?  
O9 Fe4 O21 4\_554 . . 171.48(9) ?  
O9 Fe4 O22 4\_554 . . 89.06(10) ?  
O9 Fe4 O23 4\_554 . . 92.54(10) ?  
O9 Fe4 H20 4\_554 . . 84.9(11) ?  
O9 Fe4 H21 4\_554 . . 160.6(11) ?  
O9 Fe4 H23 4\_554 . . 95.4(13) ?  
O20 Fe4 O21 . . . 80.65(9) ?  
O20 Fe4 O22 . . . 91.74(10) ?  
O20 Fe4 O23 . . . 93.69(10) ?

020 Fe4 H20 . . . 16.7(11) ?  
 020 Fe4 H21 . . . 92.0(12) ?  
 020 Fe4 H23 . . . 75.7(12) ?  
 021 Fe4 O22 . . . 88.10(9) ?  
 021 Fe4 O23 . . . 91.07(9) ?  
 021 Fe4 H20 . . . 88.2(11) ?  
 021 Fe4 H21 . . . 19.6(10) ?  
 021 Fe4 H23 . . . 85.7(12) ?  
 022 Fe4 O23 . . . 174.29(10) ?  
 022 Fe4 H20 . . . 107.0(11) ?  
 022 Fe4 H21 . . . 71.7(12) ?  
 022 Fe4 H23 . . . 166.8(11) ?  
 023 Fe4 H20 . . . 78.6(11) ?  
 023 Fe4 H21 . . . 106.3(12) ?  
 023 Fe4 H23 . . . 18.1(11) ?  
 H20 Fe4 H21 . . . 103.0(16) ?  
 H20 Fe4 H23 . . . 61.2(16) ?  
 H21 Fe4 H23 . . . 104.0(17) ?  
 Fe1 Fe5 Fe3 3\_667 . 4\_555 91.988(18) ?  
 Fe1 Fe5 P2 3\_667 . . 56.53(2) ?  
 Fe1 Fe5 P4 3\_667 . . 93.64(2) ?  
 Fe1 Fe5 P4 3\_667 . 4\_555 139.33(3) ?  
 Fe1 Fe5 K1 3\_667 . 1\_554 57.595(16) ?  
 Fe1 Fe5 K1 3\_667 . 3\_667 50.551(19) ?  
 Fe1 Fe5 O7 3\_667 . . 68.00(7) ?  
 Fe1 Fe5 O13 3\_667 . . 111.09(7) ?  
 Fe1 Fe5 O15 3\_667 . 4\_555 158.70(7) ?  
 Fe1 Fe5 O17 3\_667 . 3\_667 24.58(7) ?  
 Fe1 Fe5 O19 3\_667 . . 83.82(7) ?  
 Fe1 Fe5 O28 3\_667 . . 98.41(7) ?  
 Fe1 Fe5 H19 3\_667 . . 87.6(14) ?  
 Fe1 Fe5 H17 3\_667 . 3\_667 42.3(11) ?  
 Fe3 Fe5 P2 4\_555 . . 56.18(3) ?  
 Fe3 Fe5 P4 4\_555 . . 106.29(3) ?  
 Fe3 Fe5 P4 4\_555 . 4\_555 57.72(2) ?  
 Fe3 Fe5 K1 4\_555 . 1\_554 86.10(3) ?  
 Fe3 Fe5 K1 4\_555 . 3\_667 142.538(18) ?  
 Fe3 Fe5 O7 4\_555 . . 71.80(7) ?  
 Fe3 Fe5 O13 4\_555 . . 116.59(7) ?  
 Fe3 Fe5 O15 4\_555 . 4\_555 76.10(7) ?  
 Fe3 Fe5 O17 4\_555 . 3\_667 110.90(7) ?  
 Fe3 Fe5 O19 4\_555 . . 25.08(7) ?  
 Fe3 Fe5 O28 4\_555 . . 149.20(7) ?  
 Fe3 Fe5 H19 4\_555 . . 45.0(9) ?  
 Fe3 Fe5 H17 4\_555 . 3\_667 110.6(13) ?  
 P2 Fe5 P4 . . . 140.84(3) ?  
 P2 Fe5 P4 . . 4\_555 83.08(3) ?  
 P2 Fe5 K1 . . 1\_554 99.28(3) ?  
 P2 Fe5 K1 . . 3\_667 95.31(3) ?  
 P2 Fe5 O7 . . . 23.38(7) ?  
 P2 Fe5 O13 . . . 162.42(7) ?  
 P2 Fe5 O15 . . 4\_555 102.37(7) ?  
 P2 Fe5 O17 . . 3\_667 80.93(7) ?  
 P2 Fe5 O19 . . . 70.01(8) ?

P2 Fe5 O28 . . . 106.77(7) ?  
P2 Fe5 H19 . . . 89.6(11) ?  
P2 Fe5 H17 . . 3\_667 97.8(11) ?  
P4 Fe5 P4 . . 4\_555 119.08(3) ?  
P4 Fe5 K1 . . 1\_554 41.82(3) ?  
P4 Fe5 K1 . . 3\_667 79.90(3) ?  
P4 Fe5 O7 . . . 161.22(7) ?  
P4 Fe5 O13 . . . 21.61(7) ?  
P4 Fe5 O15 . . 4\_555 106.55(7) ?  
P4 Fe5 O17 . . 3\_667 73.60(7) ?  
P4 Fe5 O19 . . . 83.16(8) ?  
P4 Fe5 O28 . . . 101.91(8) ?  
P4 Fe5 H19 . . . 62.0(9) ?  
P4 Fe5 H17 . . 3\_667 52.5(10) ?  
P4 Fe5 K1 4\_555 . 1\_554 134.84(2) ?  
P4 Fe5 K1 4\_555 . 3\_667 150.83(3) ?  
P4 Fe5 O7 4\_555 . . 76.38(7) ?  
P4 Fe5 O13 4\_555 . . 106.98(7) ?  
P4 Fe5 O15 4\_555 . 4\_555 20.95(7) ?  
P4 Fe5 O17 4\_555 . 3\_667 163.92(7) ?  
P4 Fe5 O19 4\_555 . . 77.45(7) ?  
P4 Fe5 O28 4\_555 . . 97.59(7) ?  
P4 Fe5 H19 4\_555 . . 87.6(12) ?  
P4 Fe5 H17 4\_555 . 3\_667 165.3(12) ?  
K1 Fe5 K1 1\_554 . 3\_667 74.26(2) ?  
K1 Fe5 O7 1\_554 . . 120.01(7) ?  
K1 Fe5 O13 1\_554 . . 63.34(7) ?  
K1 Fe5 O15 1\_554 . 4\_555 137.01(7) ?  
K1 Fe5 O17 1\_554 . 3\_667 47.40(7) ?  
K1 Fe5 O19 1\_554 . . 61.79(7) ?  
K1 Fe5 O28 1\_554 . . 123.85(7) ?  
K1 Fe5 H19 1\_554 . . 47.6(12) ?  
K1 Fe5 H17 1\_554 . 3\_667 30.4(12) ?  
K1 Fe5 O7 3\_667 . . 90.62(7) ?  
K1 Fe5 O13 3\_667 . . 82.85(7) ?  
K1 Fe5 O15 3\_667 . 4\_555 138.74(7) ?  
K1 Fe5 O17 3\_667 . 3\_667 34.07(7) ?  
K1 Fe5 O19 3\_667 . . 129.45(7) ?  
K1 Fe5 O28 3\_667 . . 54.83(7) ?  
K1 Fe5 H19 3\_667 . . 121.6(12) ?  
K1 Fe5 H17 3\_667 . 3\_667 43.9(13) ?  
O7 Fe5 O13 . . . 171.56(9) ?  
O7 Fe5 O15 . . 4\_555 91.30(9) ?  
O7 Fe5 O17 . . 3\_667 89.44(10) ?  
O7 Fe5 O19 . . . 90.64(10) ?  
O7 Fe5 O28 . . . 85.34(10) ?  
O7 Fe5 H19 . . . 111.3(10) ?  
O7 Fe5 H17 . . 3\_667 109.9(11) ?  
O13 Fe5 O15 . . 4\_555 90.12(10) ?  
O13 Fe5 O17 . . 3\_667 88.12(10) ?  
O13 Fe5 O19 . . . 97.63(10) ?  
O13 Fe5 O28 . . . 86.53(10) ?  
O13 Fe5 H19 . . . 76.8(10) ?  
O13 Fe5 H17 . . 3\_667 68.8(11) ?

015 Fe5 017 4\_555 . 3\_667 172.80(9) ?  
015 Fe5 019 4\_555 . . 91.73(10) ?  
015 Fe5 028 4\_555 . . 84.28(9) ?  
015 Fe5 H19 4\_555 . . 95.8(14) ?  
015 Fe5 H17 4\_555 . 3\_667 158.8(11) ?  
017 Fe5 019 3\_667 . . 95.42(10) ?  
017 Fe5 028 3\_667 . . 88.64(9) ?  
017 Fe5 H19 3\_667 . . 90.6(14) ?  
017 Fe5 H17 3\_667 . 3\_667 21.3(10) ?  
019 Fe5 028 . . . 174.26(10) ?  
019 Fe5 H19 . . . 21.3(9) ?  
019 Fe5 H17 . . 3\_667 89.0(13) ?  
028 Fe5 H19 . . . 163.3(10) ?  
028 Fe5 H17 . . 3\_667 96.2(13) ?  
H19 Fe5 H17 . . 3\_667 77.7(18) ?  
Fe2 Fe6 Fe4 3\_565 . . 89.604(19) ?  
Fe2 Fe6 P1 3\_565 . . 56.62(2) ?  
Fe2 Fe6 P3 3\_565 . . 91.72(2) ?  
Fe2 Fe6 P3 3\_565 . 4\_554 138.49(3) ?  
Fe2 Fe6 04 3\_565 . . 68.12(7) ?  
Fe2 Fe6 010 3\_565 . 4\_554 159.05(7) ?  
Fe2 Fe6 011 3\_565 . . 110.70(7) ?  
Fe2 Fe6 018 3\_565 . 3\_565 25.09(7) ?  
Fe2 Fe6 023 3\_565 . . 79.11(7) ?  
Fe2 Fe6 029 3\_565 . . 100.62(7) ?  
Fe2 Fe6 H18 3\_565 . 3\_565 41.2(10) ?  
Fe2 Fe6 H23 3\_565 . . 86.3(13) ?  
Fe4 Fe6 P1 . . . 55.67(3) ?  
Fe4 Fe6 P3 . . . 105.31(3) ?  
Fe4 Fe6 P3 . . 4\_554 57.04(2) ?  
Fe4 Fe6 04 . . . 71.97(7) ?  
Fe4 Fe6 010 . . 4\_554 74.90(7) ?  
Fe4 Fe6 011 . . . 114.24(7) ?  
Fe4 Fe6 018 . . 3\_565 110.00(7) ?  
Fe4 Fe6 023 . . . 26.15(7) ?  
Fe4 Fe6 029 . . . 150.37(8) ?  
Fe4 Fe6 H18 . . 3\_565 111.9(13) ?  
Fe4 Fe6 H23 . . . 41.9(9) ?  
P1 Fe6 P3 . . . 139.59(3) ?  
P1 Fe6 P3 . . 4\_554 82.79(3) ?  
P1 Fe6 04 . . . 23.17(7) ?  
P1 Fe6 010 . . 4\_554 102.52(7) ?  
P1 Fe6 011 . . . 160.81(7) ?  
P1 Fe6 018 . . 3\_565 81.18(7) ?  
P1 Fe6 023 . . . 69.05(8) ?  
P1 Fe6 029 . . . 107.57(8) ?  
P1 Fe6 H18 . . 3\_565 97.6(11) ?  
P1 Fe6 H23 . . . 87.7(11) ?  
P3 Fe6 P3 . . 4\_554 118.69(3) ?  
P3 Fe6 04 . . . 159.47(7) ?  
P3 Fe6 010 . . 4\_554 105.76(7) ?  
P3 Fe6 011 . . . 21.60(6) ?  
P3 Fe6 018 . . 3\_565 72.67(7) ?  
P3 Fe6 023 . . . 81.69(8) ?

P3 Fe6 O29 . . . 102.13(8) ?  
P3 Fe6 H18 . . 3\_565 53.3(9) ?  
P3 Fe6 H23 . . . 63.7(9) ?  
P3 Fe6 O4 4\_554 . . 77.62(7) ?  
P3 Fe6 O10 4\_554 . 4\_554 20.90(7) ?  
P3 Fe6 O11 4\_554 . . 105.76(7) ?  
P3 Fe6 O18 4\_554 . 3\_565 163.58(7) ?  
P3 Fe6 O23 4\_554 . . 78.35(7) ?  
P3 Fe6 O29 4\_554 . . 99.65(8) ?  
P3 Fe6 H18 4\_554 . 3\_565 166.2(12) ?  
P3 Fe6 H23 4\_554 . . 83.5(11) ?  
O4 Fe6 O10 . . 4\_554 93.31(9) ?  
O4 Fe6 O11 . . . 173.78(9) ?  
O4 Fe6 O18 . . 3\_565 88.92(10) ?  
O4 Fe6 O23 . . . 90.33(10) ?  
O4 Fe6 O29 . . . 86.05(10) ?  
O4 Fe6 H18 . . 3\_565 107.9(10) ?  
O4 Fe6 H23 . . . 109.3(10) ?  
O10 Fe6 O11 4\_554 . . 88.80(9) ?  
O10 Fe6 O18 4\_554 . 3\_565 175.06(10) ?  
O10 Fe6 O23 4\_554 . . 91.86(9) ?  
O10 Fe6 O29 4\_554 . . 87.13(10) ?  
O10 Fe6 H18 4\_554 . 3\_565 158.7(10) ?  
O10 Fe6 H23 4\_554 . . 91.1(13) ?  
O11 Fe6 O18 . . 3\_565 88.54(10) ?  
O11 Fe6 O23 . . . 95.45(10) ?  
O11 Fe6 O29 . . . 88.21(10) ?  
O11 Fe6 H18 . . 3\_565 70.0(10) ?  
O11 Fe6 H23 . . . 76.5(10) ?  
O18 Fe6 O23 3\_565 . . 92.53(10) ?  
O18 Fe6 O29 3\_565 . . 88.63(10) ?  
O18 Fe6 H18 3\_565 . 3\_565 19.3(10) ?  
O18 Fe6 H23 3\_565 . . 92.3(12) ?  
O23 Fe6 O29 . . . 176.19(11) ?  
O23 Fe6 H18 . . 3\_565 88.9(13) ?  
O23 Fe6 H23 . . . 19.0(10) ?  
O29 Fe6 H18 . . 3\_565 93.4(13) ?  
O29 Fe6 H23 . . . 164.6(10) ?  
H18 Fe6 H23 3\_565 . . 82.7(16) ?  
Fe2 P1 Fe2 . . 3\_565 106.52(3) ?  
Fe2 P1 Fe4 . . . 147.67(3) ?  
Fe2 P1 Fe6 . . . 116.30(3) ?  
Fe2 P1 O1 . . . 127.14(10) ?  
Fe2 P1 O2 . . . 25.25(8) ?  
Fe2 P1 O3 . . . 110.34(9) ?  
Fe2 P1 O4 . . . 87.05(9) ?  
Fe2 P1 Fe4 3\_565 . . 105.13(3) ?  
Fe2 P1 Fe6 3\_565 . . 68.69(3) ?  
Fe2 P1 O1 3\_565 . . 124.28(9) ?  
Fe2 P1 O2 3\_565 . . 119.26(9) ?  
Fe2 P1 O3 3\_565 . . 27.09(9) ?  
Fe2 P1 O4 3\_565 . . 82.85(9) ?  
Fe4 P1 Fe6 . . . 70.04(3) ?  
Fe4 P1 O1 . . . 27.57(9) ?

Fe4 P1 O2 . . . 132.64(9) ?  
Fe4 P1 O3 . . . 100.83(9) ?  
Fe4 P1 O4 . . . 90.50(9) ?  
Fe6 P1 O1 . . . 96.38(10) ?  
Fe6 P1 O2 . . . 139.77(9) ?  
Fe6 P1 O3 . . . 91.42(10) ?  
Fe6 P1 O4 . . . 30.18(9) ?  
O1 P1 O2 . . . 106.49(13) ?  
O1 P1 O3 . . . 109.00(12) ?  
O1 P1 O4 . . . 111.03(13) ?  
O2 P1 O3 . . . 110.94(13) ?  
O2 P1 O4 . . . 109.62(12) ?  
O3 P1 O4 . . . 109.72(13) ?  
Fe1 P2 Fe1 . . 3\_667 104.71(3) ?  
Fe1 P2 Fe3 . . 4\_555 145.95(3) ?  
Fe1 P2 Fe5 . . . 114.18(3) ?  
Fe1 P2 K1 . . . 58.33(3) ?  
Fe1 P2 O5 . . . 127.27(10) ?  
Fe1 P2 O6 . . . 25.77(8) ?  
Fe1 P2 O7 . . . 84.76(9) ?  
Fe1 P2 O8 . . . 111.55(9) ?  
Fe1 P2 Fe3 3\_667 . 4\_555 107.67(3) ?  
Fe1 P2 Fe5 3\_667 . . 69.04(3) ?  
Fe1 P2 K1 3\_667 . . 126.02(3) ?  
Fe1 P2 O5 3\_667 . . 126.25(9) ?  
Fe1 P2 O6 3\_667 . . 115.81(9) ?  
Fe1 P2 O7 3\_667 . . 83.11(9) ?  
Fe1 P2 O8 3\_667 . . 27.03(9) ?  
Fe3 P2 Fe5 4\_555 . . 69.23(3) ?  
Fe3 P2 K1 4\_555 . . 108.10(3) ?  
Fe3 P2 O5 4\_555 . . 28.88(9) ?  
Fe3 P2 O6 4\_555 . . 134.39(9) ?  
Fe3 P2 O7 4\_555 . . 88.86(9) ?  
Fe3 P2 O8 4\_555 . . 102.11(9) ?  
Fe5 P2 K1 . . . 163.39(3) ?  
Fe5 P2 O5 . . . 97.38(10) ?  
Fe5 P2 O6 . . . 139.09(9) ?  
Fe5 P2 O7 . . . 30.48(9) ?  
Fe5 P2 O8 . . . 90.53(10) ?  
K1 P2 O5 . . . 79.29(10) ?  
K1 P2 O6 . . . 32.66(9) ?  
K1 P2 O7 . . . 136.08(9) ?  
K1 P2 O8 . . . 105.97(10) ?  
O5 P2 O6 . . . 107.77(13) ?  
O5 P2 O7 . . . 111.47(13) ?  
O5 P2 O8 . . . 109.07(12) ?  
O6 P2 O7 . . . 108.80(12) ?  
O6 P2 O8 . . . 110.13(13) ?  
O7 P2 O8 . . . 109.59(13) ?  
Fe2 P3 Fe4 1\_556 . 4\_555 111.55(3) ?  
Fe2 P3 Fe6 1\_556 . . 121.00(3) ?  
Fe2 P3 Fe6 1\_556 . 4\_555 110.91(3) ?  
Fe2 P3 O9 1\_556 . . 104.81(10) ?  
Fe2 P3 O10 1\_556 . . 88.96(9) ?

Fe2 P3 011 1\_556 . . 130.35(9) ?  
 Fe2 P3 012 1\_556 . . 25.01(9) ?  
 Fe4 P3 Fe6 4\_555 . . 103.65(4) ?  
 Fe4 P3 Fe6 4\_555 . 4\_555 67.48(2) ?  
 Fe4 P3 09 4\_555 . . 22.55(9) ?  
 Fe4 P3 010 4\_555 . . 91.11(9) ?  
 Fe4 P3 011 4\_555 . . 113.87(9) ?  
 Fe4 P3 012 4\_555 . . 124.94(9) ?  
 Fe6 P3 Fe6 . . 4\_555 126.04(3) ?  
 Fe6 P3 09 . . . 90.34(10) ?  
 Fe6 P3 010 . . . 136.72(9) ?  
 Fe6 P3 011 . . . 28.02(9) ?  
 Fe6 P3 012 . . . 96.08(9) ?  
 Fe6 P3 09 4\_555 . . 90.02(10) ?  
 Fe6 P3 010 4\_555 . . 27.91(8) ?  
 Fe6 P3 011 4\_555 . . 104.13(9) ?  
 Fe6 P3 012 4\_555 . . 133.85(10) ?  
 09 P3 010 . . . 112.92(13) ?  
 09 P3 011 . . . 109.30(13) ?  
 09 P3 012 . . . 109.68(13) ?  
 010 P3 011 . . . 108.93(13) ?  
 010 P3 012 . . . 108.36(13) ?  
 011 P3 012 . . . 107.50(12) ?  
 Fe1 P4 Fe3 1\_554 . . 115.52(3) ?  
 Fe1 P4 Fe5 1\_554 . . 121.22(3) ?  
 Fe1 P4 Fe5 1\_554 . 4\_554 108.18(3) ?  
 Fe1 P4 K1 1\_554 . 1\_554 61.50(3) ?  
 Fe1 P4 K1 1\_554 . 3\_667 61.45(2) ?  
 Fe1 P4 013 1\_554 . . 126.60(9) ?  
 Fe1 P4 014 1\_554 . . 110.04(10) ?  
 Fe1 P4 015 1\_554 . . 85.87(9) ?  
 Fe1 P4 016 1\_554 . . 24.31(9) ?  
 Fe3 P4 Fe5 . . . 103.53(4) ?  
 Fe3 P4 Fe5 . . 4\_554 66.74(3) ?  
 Fe3 P4 K1 . . 1\_554 66.25(3) ?  
 Fe3 P4 K1 . . 3\_667 144.75(3) ?  
 Fe3 P4 013 . . . 114.98(9) ?  
 Fe3 P4 014 . . . 22.60(9) ?  
 Fe3 P4 015 . . . 90.98(9) ?  
 Fe3 P4 016 . . . 121.90(9) ?  
 Fe5 P4 Fe5 . . 4\_554 127.46(3) ?  
 Fe5 P4 K1 . . 1\_554 101.55(4) ?  
 Fe5 P4 K1 . . 3\_667 61.25(2) ?  
 Fe5 P4 013 . . . 28.02(9) ?  
 Fe5 P4 014 . . . 89.79(10) ?  
 Fe5 P4 015 . . . 137.07(9) ?  
 Fe5 P4 016 . . . 97.59(9) ?  
 Fe5 P4 K1 4\_554 . 1\_554 117.69(3) ?  
 Fe5 P4 K1 4\_554 . 3\_667 148.35(3) ?  
 Fe5 P4 013 4\_554 . . 106.50(9) ?  
 Fe5 P4 014 4\_554 . . 89.34(9) ?  
 Fe5 P4 015 4\_554 . . 27.78(8) ?  
 Fe5 P4 016 4\_554 . . 132.42(10) ?  
 K1 P4 K1 1\_554 . 3\_667 84.98(3) ?

K1 P4 013 1\_554 . . 129.37(10) ?  
K1 P4 014 1\_554 . . 50.97(9) ?  
K1 P4 015 1\_554 . . 121.17(9) ?  
K1 P4 016 1\_554 . . 56.67(9) ?  
K1 P4 013 3\_667 . . 67.62(9) ?  
K1 P4 014 3\_667 . . 122.21(10) ?  
K1 P4 015 3\_667 . . 122.31(9) ?  
K1 P4 016 3\_667 . . 41.24(9) ?  
O13 P4 014 . . . 109.67(13) ?  
O13 P4 015 . . . 109.45(13) ?  
O13 P4 016 . . . 108.85(12) ?  
O14 P4 015 . . . 112.94(13) ?  
O14 P4 016 . . . 107.23(13) ?  
O15 P4 016 . . . 108.59(13) ?  
Fe1 K1 Fe1 . . 3\_668 86.45(3) ?  
Fe1 K1 Fe2 . . 3\_566 145.91(3) ?  
Fe1 K1 Fe3 . . 1\_556 100.82(2) ?  
Fe1 K1 Fe4 . . 1\_556 117.72(3) ?  
Fe1 K1 Fe5 . . 1\_556 78.08(3) ?  
Fe1 K1 Fe5 . . 3\_667 52.291(16) ?  
Fe1 K1 P2 . . . 51.54(3) ?  
Fe1 K1 P4 . . 1\_556 55.96(2) ?  
Fe1 K1 P4 . . 3\_667 68.77(2) ?  
Fe1 K1 K1 . . 3\_668 49.68(3) ?  
Fe1 K1 O5 . . . 71.39(4) ?  
Fe1 K1 O6 . . . 33.87(5) ?  
Fe1 K1 O14 . . 1\_556 79.55(5) ?  
Fe1 K1 O16 . . 1\_556 34.75(5) ?  
Fe1 K1 O16 . . 3\_667 70.29(4) ?  
Fe1 K1 O17 . . . 33.77(5) ?  
Fe1 K1 O17 . . 3\_668 71.52(5) ?  
Fe1 K1 O21 . . 1\_556 106.96(6) ?  
Fe1 K1 O22 . . 4\_556 126.94(4) ?  
Fe1 K1 O24 . . 3\_668 108.65(6) ?  
Fe1 K1 O27 . . 3\_566 166.91(7) ?  
Fe1 K1 O28 . . 3\_667 77.08(4) ?  
Fe1 K1 O30 . . 3\_668 109.73(6) ?  
Fe1 K1 O31 . . . 89.74(5) ?  
Fe1 K1 H28a . . 3\_667 77.5(8) ?  
Fe1 K1 H27a . . 3\_566 152.5(6) ?  
Fe1 K1 H24a . . 3\_668 122.9(5) ?  
Fe1 K1 H31a . . . 101.1(7) ?  
Fe1 K1 H21 . . 1\_556 92.8(10) ?  
Fe1 K1 H24b . . 3\_668 106.9(8) ?  
Fe1 K1 H31b . . . 81.2(7) ?  
Fe1 K1 H30a . . 3\_668 114.4(7) ?  
Fe1 K1 H27b . . 3\_566 173.1(6) ?  
Fe1 K1 H19 . . 1\_556 97.1(8) ?  
Fe1 K1 H17 . . . 42.5(8) ?  
Fe1 K1 H17 . . 3\_668 65.6(7) ?  
Fe1 K1 Fe2 3\_668 . 3\_566 111.10(3) ?  
Fe1 K1 Fe3 3\_668 . 1\_556 106.19(2) ?  
Fe1 K1 Fe4 3\_668 . 1\_556 140.05(3) ?  
Fe1 K1 Fe5 3\_668 . 1\_556 42.786(18) ?



Fe1 K1 Fe5 3\_668 . 3\_667 78.74(2) ?  
Fe1 K1 P2 3\_668 . . 137.97(3) ?  
Fe1 K1 P4 3\_668 . 1\_556 75.18(3) ?  
Fe1 K1 P4 3\_668 . 3\_667 40.572(17) ?  
Fe1 K1 K1 3\_668 . 3\_668 36.78(3) ?  
Fe1 K1 O5 3\_668 . . 153.79(4) ?  
Fe1 K1 O6 3\_668 . . 120.32(6) ?  
Fe1 K1 O14 3\_668 . 1\_556 82.18(5) ?  
Fe1 K1 O16 3\_668 . 1\_556 67.20(5) ?  
Fe1 K1 O16 3\_668 . 3\_667 26.62(4) ?  
Fe1 K1 O17 3\_668 . . 70.83(5) ?  
Fe1 K1 O17 3\_668 . 3\_668 25.87(4) ?  
Fe1 K1 O21 3\_668 . 1\_556 136.87(6) ?  
Fe1 K1 O22 3\_668 . 4\_556 88.88(4) ?  
Fe1 K1 O24 3\_668 . 3\_668 22.76(5) ?  
Fe1 K1 O27 3\_668 . 3\_566 100.23(7) ?  
Fe1 K1 O28 3\_668 . 3\_667 94.46(4) ?  
Fe1 K1 O30 3\_668 . 3\_668 64.04(6) ?  
Fe1 K1 O31 3\_668 . . 137.74(5) ?  
Fe1 K1 H28a 3\_668 . 3\_667 107.2(6) ?  
Fe1 K1 H27a 3\_668 . 3\_566 95.4(8) ?  
Fe1 K1 H24a 3\_668 . 3\_668 37.5(4) ?  
Fe1 K1 H31a 3\_668 . . 142.5(6) ?  
Fe1 K1 H21 3\_668 . 1\_556 147.9(10) ?  
Fe1 K1 H24b 3\_668 . 3\_668 23.6(7) ?  
Fe1 K1 H31b 3\_668 . . 144.8(5) ?  
Fe1 K1 H30a 3\_668 . 3\_668 76.4(7) ?  
Fe1 K1 H27b 3\_668 . 3\_566 87.2(5) ?  
Fe1 K1 H19 3\_668 . 1\_556 58.1(7) ?  
Fe1 K1 H17 3\_668 . . 55.9(5) ?  
Fe1 K1 H17 3\_668 . 3\_668 32.9(8) ?  
Fe2 K1 Fe3 3\_566 . 1\_556 101.74(2) ?  
Fe2 K1 Fe4 3\_566 . 1\_556 67.27(2) ?  
Fe2 K1 Fe5 3\_566 . 1\_556 134.67(3) ?  
Fe2 K1 Fe5 3\_566 . 3\_667 101.12(2) ?  
Fe2 K1 P2 3\_566 . . 106.39(4) ?  
Fe2 K1 P4 3\_566 . 1\_556 154.87(3) ?  
Fe2 K1 P4 3\_566 . 3\_667 105.23(3) ?  
Fe2 K1 K1 3\_566 . 3\_668 140.51(3) ?  
Fe2 K1 O5 3\_566 . . 95.09(4) ?  
Fe2 K1 O6 3\_566 . . 120.91(6) ?  
Fe2 K1 O14 3\_566 . 1\_556 130.15(5) ?  
Fe2 K1 O16 3\_566 . 1\_556 178.29(6) ?  
Fe2 K1 O16 3\_566 . 3\_667 112.79(4) ?  
Fe2 K1 O17 3\_566 . . 123.30(5) ?  
Fe2 K1 O17 3\_566 . 3\_668 134.30(5) ?  
Fe2 K1 O21 3\_566 . 1\_556 80.55(5) ?  
Fe2 K1 O22 3\_566 . 4\_556 83.84(4) ?  
Fe2 K1 O24 3\_566 . 3\_668 89.30(6) ?  
Fe2 K1 O27 3\_566 . 3\_566 21.02(6) ?  
Fe2 K1 O28 3\_566 . 3\_667 72.73(4) ?  
Fe2 K1 O30 3\_566 . 3\_668 58.57(5) ?  
Fe2 K1 O31 3\_566 . . 57.38(4) ?  
Fe2 K1 H28a 3\_566 . 3\_667 69.5(8) ?

Fe2 K1 H27a 3\_566 . 3\_566 15.9(8) ?  
Fe2 K1 H24a 3\_566 . 3\_668 75.1(5) ?  
Fe2 K1 H31a 3\_566 . . 47.3(8) ?  
Fe2 K1 H21 3\_566 . 1\_556 86.9(10) ?  
Fe2 K1 H24b 3\_566 . 3\_668 98.1(8) ?  
Fe2 K1 H31b 3\_566 . . 67.5(7) ?  
Fe2 K1 H30a 3\_566 . 3\_668 48.0(7) ?  
Fe2 K1 H27b 3\_566 . 3\_566 35.9(6) ?  
Fe2 K1 H19 3\_566 . 1\_556 117.0(8) ?  
Fe2 K1 H17 3\_566 . . 124.5(10) ?  
Fe2 K1 H17 3\_566 . 3\_668 141.6(7) ?  
Fe3 K1 Fe4 1\_556 . 1\_556 41.810(16) ?  
Fe3 K1 Fe5 1\_556 . 1\_556 66.964(17) ?  
Fe3 K1 Fe5 1\_556 . 3\_667 152.83(3) ?  
Fe3 K1 P2 1\_556 . . 83.59(2) ?  
Fe3 K1 P4 1\_556 . 1\_556 53.83(2) ?  
Fe3 K1 P4 1\_556 . 3\_667 143.42(3) ?  
Fe3 K1 K1 1\_556 . 3\_668 109.00(2) ?  
Fe3 K1 O5 1\_556 . . 66.05(4) ?  
Fe3 K1 O6 1\_556 . . 90.56(5) ?  
Fe3 K1 O14 1\_556 . 1\_556 31.32(5) ?  
Fe3 K1 O16 1\_556 . 1\_556 79.07(5) ?  
Fe3 K1 O16 1\_556 . 3\_667 128.77(4) ?  
Fe3 K1 O17 1\_556 . . 133.28(5) ?  
Fe3 K1 O17 1\_556 . 3\_668 88.04(4) ?  
Fe3 K1 O21 1\_556 . 1\_556 32.00(5) ?  
Fe3 K1 O22 1\_556 . 4\_556 31.67(4) ?  
Fe3 K1 O24 1\_556 . 3\_668 105.80(6) ?  
Fe3 K1 O27 1\_556 . 3\_566 88.20(6) ?  
Fe3 K1 O28 1\_556 . 3\_667 159.14(5) ?  
Fe3 K1 O30 1\_556 . 3\_668 146.72(6) ?  
Fe3 K1 O31 1\_556 . . 115.85(5) ?  
Fe3 K1 H28a 1\_556 . 3\_667 146.4(6) ?  
Fe3 K1 H27a 1\_556 . 3\_566 104.9(6) ?  
Fe3 K1 H24a 1\_556 . 3\_668 104.3(7) ?  
Fe3 K1 H31a 1\_556 . . 108.3(5) ?  
Fe3 K1 H21 1\_556 . 1\_556 42.5(10) ?  
Fe3 K1 H24b 1\_556 . 3\_668 90.5(5) ?  
Fe3 K1 H31b 1\_556 . . 108.5(5) ?  
Fe3 K1 H30a 1\_556 . 3\_668 144.8(7) ?  
Fe3 K1 H27b 1\_556 . 3\_566 83.5(8) ?  
Fe3 K1 H19 1\_556 . 1\_556 48.1(7) ?  
Fe3 K1 H17 1\_556 . . 133.5(9) ?  
Fe3 K1 H17 1\_556 . 3\_668 85.0(9) ?  
Fe4 K1 Fe5 1\_556 . 1\_556 108.00(3) ?  
Fe4 K1 Fe5 1\_556 . 3\_667 141.13(3) ?  
Fe4 K1 P2 1\_556 . . 72.60(3) ?  
Fe4 K1 P4 1\_556 . 1\_556 92.04(3) ?  
Fe4 K1 P4 1\_556 . 3\_667 172.46(2) ?  
Fe4 K1 K1 1\_556 . 3\_668 149.84(2) ?  
Fe4 K1 O5 1\_556 . . 49.91(4) ?  
Fe4 K1 O6 1\_556 . . 88.62(5) ?  
Fe4 K1 O14 1\_556 . 1\_556 72.66(5) ?  
Fe4 K1 O16 1\_556 . 1\_556 114.08(5) ?

Fe4 K1 016 1\_556 . 3\_667 166.64(4) ?  
Fe4 K1 017 1\_556 . . 145.73(6) ?  
Fe4 K1 017 1\_556 . 3\_668 129.02(4) ?  
Fe4 K1 021 1\_556 . 1\_556 13.27(5) ?  
Fe4 K1 022 1\_556 . 4\_556 51.27(4) ?  
Fe4 K1 024 1\_556 . 3\_668 126.16(6) ?  
Fe4 K1 027 1\_556 . 3\_566 63.52(6) ?  
Fe4 K1 028 1\_556 . 3\_667 120.57(5) ?  
Fe4 K1 030 1\_556 . 3\_668 125.63(6) ?  
Fe4 K1 031 1\_556 . . 77.31(5) ?  
Fe4 K1 H28a 1\_556 . 3\_667 108.8(7) ?  
Fe4 K1 H27a 1\_556 . 3\_566 77.4(7) ?  
Fe4 K1 H24a 1\_556 . 3\_668 115.1(6) ?  
Fe4 K1 H31a 1\_556 . . 67.7(5) ?  
Fe4 K1 H21 1\_556 . 1\_556 25.0(10) ?  
Fe4 K1 H24b 1\_556 . 3\_668 117.4(6) ?  
Fe4 K1 H31b 1\_556 . . 73.8(5) ?  
Fe4 K1 H30a 1\_556 . 3\_668 115.2(7) ?  
Fe4 K1 H27b 1\_556 . 3\_566 69.0(7) ?  
Fe4 K1 H19 1\_556 . 1\_556 86.2(7) ?  
Fe4 K1 H17 1\_556 . . 159.5(7) ?  
Fe4 K1 H17 1\_556 . 3\_668 126.7(9) ?  
Fe5 K1 Fe5 1\_556 . 3\_667 105.74(2) ?  
Fe5 K1 P2 1\_556 . . 115.08(3) ?  
Fe5 K1 P4 1\_556 . 1\_556 36.62(2) ?  
Fe5 K1 P4 1\_556 . 3\_667 76.51(2) ?  
Fe5 K1 K1 1\_556 . 3\_668 46.80(2) ?  
Fe5 K1 05 1\_556 . . 116.38(4) ?  
Fe5 K1 06 1\_556 . . 103.49(5) ?  
Fe5 K1 014 1\_556 . 1\_556 39.52(5) ?  
Fe5 K1 016 1\_556 . 1\_556 44.23(5) ?  
Fe5 K1 016 1\_556 . 3\_667 61.82(4) ?  
Fe5 K1 017 1\_556 . . 86.88(5) ?  
Fe5 K1 017 1\_556 . 3\_668 21.11(3) ?  
Fe5 K1 021 1\_556 . 1\_556 98.92(5) ?  
Fe5 K1 022 1\_556 . 4\_556 63.71(4) ?  
Fe5 K1 024 1\_556 . 3\_668 55.93(6) ?  
Fe5 K1 027 1\_556 . 3\_566 114.45(7) ?  
Fe5 K1 028 1\_556 . 3\_667 131.33(4) ?  
Fe5 K1 030 1\_556 . 3\_668 106.25(6) ?  
Fe5 K1 031 1\_556 . . 167.81(5) ?  
Fe5 K1 H28a 1\_556 . 3\_667 142.2(7) ?  
Fe5 K1 H27a 1\_556 . 3\_566 121.0(8) ?  
Fe5 K1 H24a 1\_556 . 3\_668 66.6(6) ?  
Fe5 K1 H31a 1\_556 . . 174.7(6) ?  
Fe5 K1 H21 1\_556 . 1\_556 105.7(10) ?  
Fe5 K1 H24b 1\_556 . 3\_668 41.7(7) ?  
Fe5 K1 H31b 1\_556 . . 157.3(6) ?  
Fe5 K1 H30a 1\_556 . 3\_668 118.2(7) ?  
Fe5 K1 H27b 1\_556 . 3\_566 99.0(6) ?  
Fe5 K1 H19 1\_556 . 1\_556 24.0(8) ?  
Fe5 K1 H17 1\_556 . . 76.3(7) ?  
Fe5 K1 H17 1\_556 . 3\_668 19.6(9) ?  
Fe5 K1 P2 3\_667 . . 76.02(2) ?

Fe5 K1 P4 3\_667 . 1\_556 103.98(3) ?  
Fe5 K1 P4 3\_667 . 3\_667 38.85(2) ?  
Fe5 K1 K1 3\_667 . 3\_668 58.935(19) ?  
Fe5 K1 O5 3\_667 . . 97.47(4) ?  
Fe5 K1 O6 3\_667 . . 65.00(5) ?  
Fe5 K1 O14 3\_667 . 1\_556 128.72(5) ?  
Fe5 K1 O16 3\_667 . 1\_556 78.48(5) ?  
Fe5 K1 O16 3\_667 . 3\_667 52.13(4) ?  
Fe5 K1 O17 3\_667 . . 22.24(4) ?  
Fe5 K1 O17 3\_667 . 3\_668 86.42(4) ?  
Fe5 K1 O21 3\_667 . 1\_556 141.72(6) ?  
Fe5 K1 O22 3\_667 . 4\_556 167.60(4) ?  
Fe5 K1 O24 3\_667 . 3\_668 88.94(6) ?  
Fe5 K1 O27 3\_667 . 3\_566 117.66(6) ?  
Fe5 K1 O28 3\_667 . 3\_667 29.01(4) ?  
Fe5 K1 O30 3\_667 . 3\_668 59.81(6) ?  
Fe5 K1 O31 3\_667 . . 66.06(4) ?  
Fe5 K1 H28a 3\_667 . 3\_667 36.8(8) ?  
Fe5 K1 H27a 3\_667 . 3\_566 101.1(6) ?  
Fe5 K1 H24a 3\_667 . 3\_668 95.6(7) ?  
Fe5 K1 H31a 3\_667 . . 77.4(6) ?  
Fe5 K1 H21 3\_667 . 1\_556 125.1(10) ?  
Fe5 K1 H24b 3\_667 . 3\_668 100.6(6) ?  
Fe5 K1 H31b 3\_667 . . 67.6(5) ?  
Fe5 K1 H30a 3\_667 . 3\_668 62.3(7) ?  
Fe5 K1 H27b 3\_667 . 3\_566 123.6(8) ?  
Fe5 K1 H19 3\_667 . 1\_556 129.6(8) ?  
Fe5 K1 H17 3\_667 . . 29.5(7) ?  
Fe5 K1 H17 3\_667 . 3\_668 86.2(9) ?  
P2 K1 P4 . . 1\_556 79.01(3) ?  
P2 K1 P4 . . 3\_667 111.36(3) ?  
P2 K1 K1 . . 3\_668 101.21(3) ?  
P2 K1 O5 . . . 22.73(4) ?  
P2 K1 O6 . . . 17.72(5) ?  
P2 K1 O14 . . 1\_556 88.03(6) ?  
P2 K1 O16 . . 1\_556 75.16(6) ?  
P2 K1 O16 . . 3\_667 118.82(5) ?  
P2 K1 O17 . . . 73.13(5) ?  
P2 K1 O17 . . 3\_668 119.10(5) ?  
P2 K1 O21 . . 1\_556 67.07(6) ?  
P2 K1 O22 . . 4\_556 113.72(4) ?  
P2 K1 O24 . . 3\_668 159.94(6) ?  
P2 K1 O27 . . 3\_566 121.17(7) ?  
P2 K1 O28 . . 3\_667 78.96(5) ?  
P2 K1 O30 . . 3\_668 125.88(6) ?  
P2 K1 O31 . . . 55.24(5) ?  
P2 K1 H28a . . 3\_667 69.0(7) ?  
P2 K1 H27a . . 3\_566 122.0(8) ?  
P2 K1 H24a . . 3\_668 171.6(7) ?  
P2 K1 H31a . . . 61.2(7) ?  
P2 K1 H21 . . 1\_556 50.0(10) ?  
P2 K1 H24b . . 3\_668 155.4(8) ?  
P2 K1 H31b . . . 42.9(6) ?  
P2 K1 H30a . . 3\_668 118.6(7) ?

P2 K1 H27b . . 3\_566 134.8(5) ?  
P2 K1 H19 . . 1\_556 118.7(7) ?  
P2 K1 H17 . . . 87.4(6) ?  
P2 K1 H17 . . 3\_668 111.9(7) ?  
P4 K1 P4 1\_556 . 3\_667 95.02(3) ?  
P4 K1 K1 1\_556 . 3\_668 57.91(2) ?  
P4 K1 05 1\_556 . . 80.75(4) ?  
P4 K1 06 1\_556 . . 70.20(5) ?  
P4 K1 014 1\_556 . 1\_556 24.76(5) ?  
P4 K1 016 1\_556 . 1\_556 25.64(5) ?  
P4 K1 016 1\_556 . 3\_667 83.97(4) ?  
P4 K1 017 1\_556 . . 81.82(5) ?  
P4 K1 017 1\_556 . 3\_668 49.34(4) ?  
P4 K1 021 1\_556 . 1\_556 79.19(5) ?  
P4 K1 022 1\_556 . 4\_556 71.77(4) ?  
P4 K1 024 1\_556 . 3\_668 92.13(6) ?  
P4 K1 027 1\_556 . 3\_566 136.54(7) ?  
P4 K1 028 1\_556 . 3\_667 132.06(5) ?  
P4 K1 030 1\_556 . 3\_668 138.00(6) ?  
P4 K1 031 1\_556 . . 134.21(5) ?  
P4 K1 H28a 1\_556 . 3\_667 133.4(8) ?  
P4 K1 H27a 1\_556 . 3\_566 150.8(7) ?  
P4 K1 H24a 1\_556 . 3\_668 103.2(6) ?  
P4 K1 H31a 1\_556 . . 138.9(7) ?  
P4 K1 H21 1\_556 . 1\_556 77.9(10) ?  
P4 K1 H24b 1\_556 . 3\_668 78.3(7) ?  
P4 K1 H31b 1\_556 . . 121.9(6) ?  
P4 K1 H30a 1\_556 . 3\_668 150.5(7) ?  
P4 K1 H27b 1\_556 . 3\_566 124.7(7) ?  
P4 K1 H19 1\_556 . 1\_556 44.2(8) ?  
P4 K1 H17 1\_556 . . 79.7(9) ?  
P4 K1 H17 1\_556 . 3\_668 42.6(9) ?  
P4 K1 K1 3\_667 . 3\_668 37.111(15) ?  
P4 K1 05 3\_667 . . 134.05(4) ?  
P4 K1 06 3\_667 . . 96.26(5) ?  
P4 K1 014 3\_667 . 1\_556 113.37(5) ?  
P4 K1 016 3\_667 . 1\_556 73.41(5) ?  
P4 K1 016 3\_667 . 3\_667 14.98(3) ?  
P4 K1 017 3\_667 . . 38.75(5) ?  
P4 K1 017 3\_667 . 3\_668 55.40(4) ?  
P4 K1 021 3\_667 . 1\_556 174.17(5) ?  
P4 K1 022 3\_667 . 4\_556 128.98(4) ?  
P4 K1 024 3\_667 . 3\_668 51.01(6) ?  
P4 K1 027 3\_667 . 3\_566 109.24(7) ?  
P4 K1 028 3\_667 . 3\_667 55.60(4) ?  
P4 K1 030 3\_667 . 3\_668 46.83(5) ?  
P4 K1 031 3\_667 . . 99.49(5) ?  
P4 K1 H28a 3\_667 . 3\_667 67.9(7) ?  
P4 K1 H27a 3\_667 . 3\_566 95.1(7) ?  
P4 K1 H24a 3\_667 . 3\_668 60.6(6) ?  
P4 K1 H31a 3\_667 . . 108.1(5) ?  
P4 K1 H21 3\_667 . 1\_556 160.8(10) ?  
P4 K1 H24b 3\_667 . 3\_668 61.8(6) ?  
P4 K1 H31b 3\_667 . . 104.5(5) ?

P4 K1 H30a 3\_667 . 3\_668 57.4(7) ?  
P4 K1 H27b 3\_667 . 3\_566 104.6(7) ?  
P4 K1 H19 3\_667 . 1\_556 97.0(7) ?  
P4 K1 H17 3\_667 . . 26.4(8) ?  
P4 K1 H17 3\_667 . 3\_668 58.6(9) ?  
K1 K1 05 3\_668 . . 119.60(4) ?  
K1 K1 06 3\_668 . . 83.54(5) ?  
K1 K1 014 3\_668 . 1\_556 77.72(5) ?  
K1 K1 016 3\_668 . 1\_556 37.92(5) ?  
K1 K1 016 3\_668 . 3\_667 27.72(4) ?  
K1 K1 017 3\_668 . . 41.46(5) ?  
K1 K1 017 3\_668 . 3\_668 28.66(4) ?  
K1 K1 021 3\_668 . 1\_556 137.10(5) ?  
K1 K1 022 3\_668 . 4\_556 110.21(4) ?  
K1 K1 024 3\_668 . 3\_668 59.16(6) ?  
K1 K1 027 3\_668 . 3\_566 136.05(7) ?  
K1 K1 028 3\_668 . 3\_667 85.72(4) ?  
K1 K1 030 3\_668 . 3\_668 82.42(5) ?  
K1 K1 031 3\_668 . . 124.23(5) ?  
K1 K1 H28a 3\_668 . 3\_667 95.5(7) ?  
K1 K1 H27a 3\_668 . 3\_566 127.2(7) ?  
K1 K1 H24a 3\_668 . 3\_668 73.8(4) ?  
K1 K1 H31a 3\_668 . . 136.2(6) ?  
K1 K1 H21 3\_668 . 1\_556 132.6(10) ?  
K1 K1 H24b 3\_668 . 3\_668 58.3(8) ?  
K1 K1 H31b 3\_668 . . 122.2(6) ?  
K1 K1 H30a 3\_668 . 3\_668 93.9(7) ?  
K1 K1 H27b 3\_668 . 3\_566 124.0(5) ?  
K1 K1 H19 3\_668 . 1\_556 70.7(8) ?  
K1 K1 H17 3\_668 . . 29.5(7) ?  
K1 K1 H17 3\_668 . 3\_668 27.3(9) ?  
05 K1 06 . . . 39.09(6) ?  
05 K1 014 . . 1\_556 80.22(6) ?  
05 K1 016 . . 1\_556 86.61(6) ?  
05 K1 016 . . 3\_667 140.98(6) ?  
05 K1 017 . . . 95.84(6) ?  
05 K1 017 . . 3\_668 128.89(5) ?  
05 K1 021 . . 1\_556 44.74(6) ?  
05 K1 022 . . 4\_556 93.36(5) ?  
05 K1 024 . . 3\_668 171.37(7) ?  
05 K1 027 . . 3\_566 104.35(7) ?  
05 K1 028 . . 3\_667 94.02(6) ?  
05 K1 030 . . 3\_668 136.14(7) ?  
05 K1 031 . . . 58.20(6) ?  
05 K1 H28a . . 3\_667 82.1(7) ?  
05 K1 H27a . . 3\_566 110.7(8) ?  
05 K1 H24a . . 3\_668 165.0(5) ?  
05 K1 H31a . . . 58.7(6) ?  
05 K1 H21 . . 1\_556 27.7(10) ?  
05 K1 H24b . . 3\_668 155.0(5) ?  
05 K1 H31b . . . 46.8(5) ?  
05 K1 H30a . . 3\_668 125.1(7) ?  
05 K1 H27b . . 3\_566 115.4(6) ?  
05 K1 H19 . . 1\_556 109.8(6) ?

05 K1 H17 . . . 109.9(6) ?  
05 K1 H17 . . 3\_668 121.5(8) ?  
06 K1 014 . . 1\_556 85.54(7) ?  
06 K1 016 . . 1\_556 60.48(7) ?  
06 K1 016 . . 3\_667 101.91(6) ?  
06 K1 017 . . . 57.51(7) ?  
06 K1 017 . . 3\_668 103.26(6) ?  
06 K1 021 . . 1\_556 81.20(7) ?  
06 K1 022 . . 4\_556 122.23(6) ?  
06 K1 024 . . 3\_668 142.29(8) ?  
06 K1 027 . . 3\_566 137.95(8) ?  
06 K1 028 . . 3\_667 76.12(7) ?  
06 K1 030 . . 3\_668 122.26(8) ?  
06 K1 031 . . . 65.20(6) ?  
06 K1 H28a . . 3\_667 69.2(8) ?  
06 K1 H27a . . 3\_566 135.5(8) ?  
06 K1 H24a . . 3\_668 155.9(5) ?  
06 K1 H31a . . . 73.9(8) ?  
06 K1 H21 . . 1\_556 64.6(10) ?  
06 K1 H24b . . 3\_668 139.8(8) ?  
06 K1 H31b . . . 53.9(6) ?  
06 K1 H30a . . 3\_668 119.0(7) ?  
06 K1 H27b . . 3\_566 152.3(5) ?  
06 K1 H19 . . 1\_556 113.8(7) ?  
06 K1 H17 . . . 71.0(7) ?  
06 K1 H17 . . 3\_668 96.5(7) ?  
014 K1 016 1\_556 . 1\_556 50.26(6) ?  
014 K1 016 1\_556 . 3\_667 99.71(6) ?  
014 K1 017 1\_556 . . 106.52(7) ?  
014 K1 017 1\_556 . 3\_668 59.46(6) ?  
014 K1 021 1\_556 . 1\_556 61.34(7) ?  
014 K1 022 1\_556 . 4\_556 47.48(6) ?  
014 K1 024 1\_556 . 3\_668 91.27(8) ?  
014 K1 027 1\_556 . 3\_566 112.34(8) ?  
014 K1 028 1\_556 . 3\_667 156.55(7) ?  
014 K1 030 1\_556 . 3\_668 143.62(8) ?  
014 K1 031 1\_556 . . 138.25(7) ?  
014 K1 H28a 1\_556 . 3\_667 154.5(8) ?  
014 K1 H27a 1\_556 . 3\_566 127.9(7) ?  
014 K1 H24a 1\_556 . 3\_668 97.2(7) ?  
014 K1 H31a 1\_556 . . 135.2(6) ?  
014 K1 H21 1\_556 . 1\_556 66.2(10) ?  
014 K1 H24b 1\_556 . 3\_668 75.0(5) ?  
014 K1 H31b 1\_556 . . 127.0(5) ?  
014 K1 H30a 1\_556 . 3\_668 153.3(7) ?  
014 K1 H27b 1\_556 . 3\_566 102.2(7) ?  
014 K1 H19 1\_556 . 1\_556 30.8(7) ?  
014 K1 H17 1\_556 . . 103.1(9) ?  
014 K1 H17 1\_556 . 3\_668 55.1(9) ?  
016 K1 016 1\_556 . 3\_667 65.64(6) ?  
016 K1 017 1\_556 . . 56.27(6) ?  
016 K1 017 1\_556 . 3\_668 44.09(6) ?  
016 K1 021 1\_556 . 1\_556 100.81(7) ?  
016 K1 022 1\_556 . 4\_556 96.22(6) ?

016 K1 024 1\_556 . 3\_668 89.03(7) ?  
016 K1 027 1\_556 . 3\_566 158.26(8) ?  
016 K1 028 1\_556 . 3\_667 107.04(6) ?  
016 K1 030 1\_556 . 3\_668 119.99(7) ?  
016 K1 031 1\_556 . . 123.68(7) ?  
016 K1 H28a 1\_556 . 3\_667 110.6(8) ?  
016 K1 H27a 1\_556 . 3\_566 162.4(8) ?  
016 K1 H24a 1\_556 . 3\_668 103.2(5) ?  
016 K1 H31a 1\_556 . . 134.0(8) ?  
016 K1 H21 1\_556 . 1\_556 94.7(10) ?  
016 K1 H24b 1\_556 . 3\_668 80.3(8) ?  
016 K1 H31b 1\_556 . . 113.7(7) ?  
016 K1 H30a 1\_556 . 3\_668 130.7(7) ?  
016 K1 H27b 1\_556 . 3\_566 143.1(6) ?  
016 K1 H19 1\_556 . 1\_556 62.4(8) ?  
016 K1 H17 1\_556 . . 54.6(10) ?  
016 K1 H17 1\_556 . 3\_668 36.8(7) ?  
016 K1 017 3\_667 . . 46.32(6) ?  
016 K1 017 3\_667 . 3\_668 40.79(5) ?  
016 K1 021 3\_667 . 1\_556 160.73(6) ?  
016 K1 022 3\_667 . 4\_556 115.48(5) ?  
016 K1 024 3\_667 . 3\_668 41.66(6) ?  
016 K1 027 3\_667 . 3\_566 111.35(7) ?  
016 K1 028 3\_667 . 3\_667 70.58(5) ?  
016 K1 030 3\_667 . 3\_668 54.98(6) ?  
016 K1 031 3\_667 . . 114.47(6) ?  
016 K1 H28a 3\_667 . 3\_667 82.9(7) ?  
016 K1 H27a 3\_667 . 3\_566 100.0(7) ?  
016 K1 H24a 3\_667 . 3\_668 54.0(5) ?  
016 K1 H31a 3\_667 . . 123.0(5) ?  
016 K1 H21 3\_667 . 1\_556 160.2(10) ?  
016 K1 H24b 3\_667 . 3\_668 49.3(6) ?  
016 K1 H31b 3\_667 . . 119.0(5) ?  
016 K1 H30a 3\_667 . 3\_668 66.9(7) ?  
016 K1 H27b 3\_667 . 3\_566 102.8(6) ?  
016 K1 H19 3\_667 . 1\_556 82.1(7) ?  
016 K1 H17 3\_667 . . 31.6(6) ?  
016 K1 H17 3\_667 . 3\_668 44.7(9) ?  
017 K1 017 . . 3\_668 70.12(6) ?  
017 K1 021 . . 1\_556 138.37(8) ?  
017 K1 022 . . 4\_556 150.20(6) ?  
017 K1 024 . . 3\_668 87.90(8) ?  
017 K1 027 . . 3\_566 138.51(8) ?  
017 K1 028 . . 3\_667 51.11(6) ?  
017 K1 030 . . 3\_668 75.96(7) ?  
017 K1 031 . . . 83.05(6) ?  
017 K1 H28a . . 3\_667 57.4(8) ?  
017 K1 H27a . . 3\_566 121.8(6) ?  
017 K1 H24a . . 3\_668 99.1(6) ?  
017 K1 H31a . . . 95.3(6) ?  
017 K1 H21 . . 1\_556 122.1(10) ?  
017 K1 H24b . . 3\_668 94.5(7) ?  
017 K1 H31b . . . 81.0(6) ?  
017 K1 H30a . . 3\_668 81.4(7) ?



017 K1 H27b . . 3\_566 140.5(7) ?  
017 K1 H19 . . 1\_556 110.8(8) ?  
017 K1 H17 . . . 15.0(5) ?  
017 K1 H17 . . 3\_668 68.0(8) ?  
017 K1 021 3\_668 . 1\_556 119.93(6) ?  
017 K1 022 3\_668 . 4\_556 82.08(5) ?  
017 K1 024 3\_668 . 3\_668 45.45(6) ?  
017 K1 027 3\_668 . 3\_566 118.69(8) ?  
017 K1 028 3\_668 . 3\_667 110.41(5) ?  
017 K1 030 3\_668 . 3\_668 89.34(6) ?  
017 K1 031 3\_668 . . 152.46(6) ?  
017 K1 H28a 3\_668 . 3\_667 121.9(7) ?  
017 K1 H27a 3\_668 . 3\_566 118.4(8) ?  
017 K1 H24a 3\_668 . 3\_668 59.2(5) ?  
017 K1 H31a 3\_668 . . 163.3(5) ?  
017 K1 H21 3\_668 . 1\_556 125.2(10) ?  
017 K1 H24b 3\_668 . 3\_668 36.6(8) ?  
017 K1 H31b 3\_668 . . 150.5(6) ?  
017 K1 H30a 3\_668 . 3\_668 101.8(7) ?  
017 K1 H27b 3\_668 . 3\_566 103.5(5) ?  
017 K1 H19 3\_668 . 1\_556 43.5(7) ?  
017 K1 H17 3\_668 . . 57.5(6) ?  
017 K1 H17 3\_668 . 3\_668 7.5(8) ?  
021 K1 022 1\_556 . 4\_556 49.99(6) ?  
021 K1 024 1\_556 . 3\_668 129.31(8) ?  
021 K1 027 1\_556 . 3\_566 75.84(8) ?  
021 K1 028 1\_556 . 3\_667 128.19(7) ?  
021 K1 030 1\_556 . 3\_668 138.84(7) ?  
021 K1 031 1\_556 . . 84.25(7) ?  
021 K1 H28a 1\_556 . 3\_667 115.6(7) ?  
021 K1 H27a 1\_556 . 3\_566 90.4(7) ?  
021 K1 H24a 1\_556 . 3\_668 121.2(6) ?  
021 K1 H31a 1\_556 . . 76.3(5) ?  
021 K1 H21 1\_556 . 1\_556 17.1(10) ?  
021 K1 H24b 1\_556 . 3\_668 117.1(6) ?  
021 K1 H31b 1\_556 . . 78.3(5) ?  
021 K1 H30a 1\_556 . 3\_668 128.5(7) ?  
021 K1 H27b 1\_556 . 3\_566 79.6(7) ?  
021 K1 H19 1\_556 . 1\_556 79.3(7) ?  
021 K1 H17 1\_556 . . 149.4(9) ?  
021 K1 H17 1\_556 . 3\_668 116.3(9) ?  
022 K1 024 4\_556 . 3\_668 79.71(7) ?  
022 K1 027 4\_556 . 3\_566 64.89(7) ?  
022 K1 028 4\_556 . 3\_667 155.95(5) ?  
022 K1 030 4\_556 . 3\_668 115.21(7) ?  
022 K1 031 4\_556 . . 125.42(5) ?  
022 K1 H28a 4\_556 . 3\_667 152.3(8) ?  
022 K1 H27a 4\_556 . 3\_566 80.6(6) ?  
022 K1 H24a 4\_556 . 3\_668 74.5(7) ?  
022 K1 H31a 4\_556 . . 113.6(6) ?  
022 K1 H21 4\_556 . 1\_556 66.1(10) ?  
022 K1 H24b 4\_556 . 3\_668 67.3(6) ?  
022 K1 H31b 4\_556 . . 124.7(5) ?  
022 K1 H30a 4\_556 . 3\_668 115.7(7) ?

022 K1 H27b 4\_556 . 3\_566 55.6(7) ?  
022 K1 H19 4\_556 . 1\_556 39.7(8) ?  
022 K1 H17 4\_556 . . 139.6(6) ?  
022 K1 H17 4\_556 . 3\_668 83.0(9) ?  
024 K1 027 3\_668 . 3\_566 77.48(8) ?  
024 K1 028 3\_668 . 3\_667 94.38(7) ?  
024 K1 030 3\_668 . 3\_668 52.35(8) ?  
024 K1 031 3\_668 . . 130.17(7) ?  
024 K1 H28a 3\_668 . 3\_667 106.5(7) ?  
024 K1 H27a 3\_668 . 3\_566 73.4(8) ?  
024 K1 H24a 3\_668 . 3\_668 14.8(4) ?  
024 K1 H31a 3\_668 . . 128.8(7) ?  
024 K1 H21 3\_668 . 1\_556 145.9(10) ?  
024 K1 H24b 3\_668 . 3\_668 16.4(5) ?  
024 K1 H31b 3\_668 . . 141.7(5) ?  
024 K1 H30a 3\_668 . 3\_668 63.1(7) ?  
024 K1 H27b 3\_668 . 3\_566 64.8(6) ?  
024 K1 H19 3\_668 . 1\_556 61.6(6) ?  
024 K1 H17 3\_668 . . 73.3(6) ?  
024 K1 H17 3\_668 . 3\_668 52.9(8) ?  
027 K1 028 3\_566 . 3\_667 91.10(7) ?  
027 K1 030 3\_566 . 3\_668 64.29(8) ?  
027 K1 031 3\_566 . . 77.73(7) ?  
027 K1 H28a 3\_566 . 3\_667 89.7(8) ?  
027 K1 H27a 3\_566 . 3\_566 16.7(6) ?  
027 K1 H24a 3\_566 . 3\_668 62.7(4) ?  
027 K1 H31a 3\_566 . . 66.8(8) ?  
027 K1 H21 3\_566 . 1\_556 87.5(10) ?  
027 K1 H24b 3\_566 . 3\_668 82.3(8) ?  
027 K1 H31b 3\_566 . . 87.0(7) ?  
027 K1 H30a 3\_566 . 3\_668 57.3(7) ?  
027 K1 H27b 3\_566 . 3\_566 15.6(5) ?  
027 K1 H19 3\_566 . 1\_556 96.0(8) ?  
027 K1 H17 3\_566 . . 134.0(9) ?  
027 K1 H17 3\_566 . 3\_668 125.2(7) ?  
028 K1 030 3\_667 . 3\_668 47.20(7) ?  
028 K1 031 3\_667 . . 43.96(6) ?  
028 K1 H28a 3\_667 . 3\_667 12.8(6) ?  
028 K1 H27a 3\_667 . 3\_566 75.4(7) ?  
028 K1 H24a 3\_667 . 3\_668 93.9(7) ?  
028 K1 H31a 3\_667 . . 52.9(5) ?  
028 K1 H21 3\_667 . 1\_556 116.6(10) ?  
028 K1 H24b 3\_667 . 3\_668 110.1(5) ?  
028 K1 H31b 3\_667 . . 50.7(5) ?  
028 K1 H30a 3\_667 . 3\_668 43.1(7) ?  
028 K1 H27b 3\_667 . 3\_566 100.7(7) ?  
028 K1 H19 3\_667 . 1\_556 152.5(7) ?  
028 K1 H17 3\_667 . . 57.3(8) ?  
028 K1 H17 3\_667 . 3\_668 112.1(9) ?  
030 K1 031 3\_668 . . 77.97(7) ?  
030 K1 H28a 3\_668 . 3\_667 56.9(7) ?  
030 K1 H27a 3\_668 . 3\_566 48.8(6) ?  
030 K1 H24a 3\_668 . 3\_668 47.6(7) ?  
030 K1 H31a 3\_668 . . 79.0(6) ?

030 K1 H21 3\_668 . 1\_556 144.0(10) ?  
030 K1 H24b 3\_668 . 3\_668 68.6(5) ?  
030 K1 H31b 3\_668 . . 89.4(5) ?  
030 K1 H30a 3\_668 . 3\_668 12.5(7) ?  
030 K1 H27b 3\_668 . 3\_566 64.9(7) ?  
030 K1 H19 3\_668 . 1\_556 113.4(6) ?  
030 K1 H17 3\_668 . . 69.7(9) ?  
030 K1 H17 3\_668 . 3\_668 95.6(9) ?  
031 K1 H28a . . 3\_667 31.6(7) ?  
031 K1 H27a . . 3\_566 70.5(8) ?  
031 K1 H24a . . 3\_668 121.8(7) ?  
031 K1 H31a . . . 12.4(7) ?  
031 K1 H21 . . 1\_556 74.3(10) ?  
031 K1 H24b . . 3\_668 146.0(6) ?  
031 K1 H31b . . . 12.4(6) ?  
031 K1 H30a . . 3\_668 67.1(7) ?  
031 K1 H27b . . 3\_566 93.1(6) ?  
031 K1 H19 . . 1\_556 163.4(7) ?  
031 K1 H17 . . . 95.0(6) ?  
031 K1 H17 . . 3\_668 151.0(8) ?  
H28a K1 H27a 3\_667 . 3\_566 75.7(11) ?  
H28a K1 H24a 3\_667 . 3\_668 104.5(10) ?  
H28a K1 H31a 3\_667 . . 41.5(9) ?  
H28a K1 H21 3\_667 . 1\_556 103.9(12) ?  
H28a K1 H24b 3\_667 . 3\_668 122.5(8) ?  
H28a K1 H31b 3\_667 . . 37.9(8) ?  
H28a K1 H30a 3\_667 . 3\_668 50.3(10) ?  
H28a K1 H27b 3\_667 . 3\_566 101.8(11) ?  
H28a K1 H19 3\_667 . 1\_556 165.0(10) ?  
H28a K1 H17 3\_667 . . 66.2(11) ?  
H28a K1 H17 3\_667 . 3\_668 122.6(12) ?  
H27a K1 H24a 3\_566 . 3\_668 59.2(9) ?  
H27a K1 H31a 3\_566 . . 61.7(11) ?  
H27a K1 H21 3\_566 . 1\_556 99.7(12) ?  
H27a K1 H24b 3\_566 . 3\_668 82.5(11) ?  
H27a K1 H31b 3\_566 . . 81.6(10) ?  
H27a K1 H30a 3\_566 . 3\_668 40.8(9) ?  
H27a K1 H27b 3\_566 . 3\_566 26.1(10) ?  
H27a K1 H19 3\_566 . 1\_556 107.2(11) ?  
H27a K1 H17 3\_566 . . 118.3(11) ?  
H27a K1 H17 3\_566 . 3\_668 125.8(11) ?  
H24a K1 H31a 3\_668 . . 117.7(9) ?  
H24a K1 H21 3\_668 . 1\_556 138.2(12) ?  
H24a K1 H24b 3\_668 . 3\_668 24.9(9) ?  
H24a K1 H31b 3\_668 . . 134.2(9) ?  
H24a K1 H30a 3\_668 . 3\_668 56.1(10) ?  
H24a K1 H27b 3\_668 . 3\_566 50.4(7) ?  
H24a K1 H19 3\_668 . 1\_556 66.4(10) ?  
H24a K1 H17 3\_668 . . 85.1(8) ?  
H24a K1 H17 3\_668 . 3\_668 66.7(9) ?  
H31a K1 H21 . . 1\_556 69.1(11) ?  
H31a K1 H24b . . 3\_668 142.6(10) ?  
H31a K1 H31b . . . 20.3(10) ?  
H31a K1 H30a . . 3\_668 66.9(9) ?

H31a K1 H27b . . 3\_566 82.4(9) ?  
 H31a K1 H19 . . 1\_556 152.9(10) ?  
 H31a K1 H17 . . . 106.7(9) ?  
 H31a K1 H17 . . 3\_668 163.3(11) ?  
 H21 K1 H24b 1\_556 . 3\_668 132.2(11) ?  
 H21 K1 H31b 1\_556 . . 66.0(11) ?  
 H21 K1 H30a 1\_556 . 3\_668 131.6(12) ?  
 H21 K1 H27b 1\_556 . 3\_566 94.0(12) ?  
 H21 K1 H19 1\_556 . 1\_556 90.3(12) ?  
 H21 K1 H17 1\_556 . . 134.7(13) ?  
 H21 K1 H17 1\_556 . 3\_668 119.6(13) ?  
 H24b K1 H31b 3\_668 . . 157.9(8) ?  
 H24b K1 H30a 3\_668 . 3\_668 79.0(9) ?  
 H24b K1 H27b 3\_668 . 3\_566 67.5(10) ?  
 H24b K1 H19 3\_668 . 1\_556 45.3(8) ?  
 H24b K1 H17 3\_668 . . 79.5(8) ?  
 H24b K1 H17 3\_668 . 3\_668 43.7(11) ?  
 H31b K1 H30a . . 3\_668 78.9(9) ?  
 H31b K1 H27b . . 3\_566 102.6(8) ?  
 H31b K1 H19 . . 1\_556 156.0(8) ?  
 H31b K1 H17 . . . 94.6(8) ?  
 H31b K1 H17 . . 3\_668 146.2(10) ?  
 H30a K1 H27b 3\_668 . 3\_566 61.3(10) ?  
 H30a K1 H19 3\_668 . 1\_556 122.5(10) ?  
 H30a K1 H17 3\_668 . . 77.8(12) ?  
 H30a K1 H17 3\_668 . 3\_668 108.2(11) ?  
 H27b K1 H19 3\_566 . 1\_556 81.8(10) ?  
 H27b K1 H17 3\_566 . . 130.9(11) ?  
 H27b K1 H17 3\_566 . 3\_668 109.8(9) ?  
 H19 K1 H17 1\_556 . . 100.2(10) ?  
 H19 K1 H17 1\_556 . 3\_668 43.5(12) ?  
 H17 K1 H17 . . 3\_668 56.7(11) ?  
 Fe4 O1 P1 . . . 131.39(15) ?  
 Fe2 O2 P1 . . . 134.96(14) ?  
 Fe2 O3 P1 3\_565 . . 132.13(14) ?  
 Fe6 O4 P1 . . . 126.65(13) ?  
 Fe3 O5 P2 4\_555 . . 129.33(15) ?  
 Fe3 O5 K1 4\_555 . . 152.49(10) ?  
 P2 O5 K1 . . . 77.98(9) ?  
 Fe1 O6 P2 . . . 134.42(14) ?  
 Fe1 O6 K1 . . . 95.75(9) ?  
 P2 O6 K1 . . . 129.62(12) ?  
 Fe5 O7 P2 . . . 126.15(13) ?  
 Fe1 O8 P2 3\_667 . . 132.09(14) ?  
 Fe4 O9 P3 4\_555 . . 140.39(15) ?  
 Fe6 O10 P3 4\_555 . . 131.19(14) ?  
 Fe6 O11 P3 . . . 130.38(13) ?  
 Fe2 O12 P3 1\_556 . . 135.64(14) ?  
 Fe5 O13 P4 . . . 130.37(14) ?  
 Fe3 O14 P4 . . . 140.13(15) ?  
 Fe3 O14 K1 . . 1\_554 100.52(9) ?  
 P4 O14 K1 . . 1\_554 104.27(11) ?  
 Fe5 O15 P4 4\_554 . . 131.27(14) ?  
 Fe1 O16 P4 1\_554 . . 137.15(14) ?

Fe1 016 K1 1\_554 . 1\_554 87.03(8) ?  
Fe1 016 K1 1\_554 . 3\_667 91.39(8) ?  
P4 016 K1 . . 1\_554 97.69(10) ?  
P4 016 K1 . . 3\_667 123.78(11) ?  
K1 016 K1 1\_554 . 3\_667 114.36(7) ?  
Fe1 017 Fe5 . . 3\_667 129.98(13) ?  
Fe1 017 K1 . . . 88.05(8) ?  
Fe1 017 K1 . . 3\_668 87.13(7) ?  
Fe1 017 H17 . . . 117(4) ?  
Fe5 017 K1 3\_667 . . 123.69(10) ?  
Fe5 017 K1 3\_667 . 3\_668 111.48(8) ?  
Fe5 017 H17 3\_667 . . 97(4) ?  
K1 017 K1 . . 3\_668 109.88(7) ?  
K1 017 H17 . . . 98(4) ?  
K1 017 H17 3\_668 . . 32(4) ?  
Fe2 018 Fe6 . . 3\_565 128.66(13) ?  
Fe2 018 H18 . . . 110(4) ?  
Fe6 018 H18 3\_565 . . 108(4) ?  
Fe3 019 Fe5 4\_555 . . 130.41(12) ?  
Fe3 019 H19 4\_555 . . 125(4) ?  
Fe5 019 H19 . . . 99(4) ?  
Fe3 020 Fe4 . . . 100.00(10) ?  
Fe3 020 H20 . . . 108(3) ?  
Fe4 020 H20 . . . 120(3) ?  
Fe3 021 Fe4 . . . 99.28(10) ?  
Fe3 021 K1 . . 1\_554 101.92(9) ?  
Fe3 021 H21 . . . 119(4) ?  
Fe4 021 K1 . . 1\_554 148.40(11) ?  
Fe4 021 H21 . . . 106(3) ?  
K1 021 H21 1\_554 . . 84(4) ?  
Fe3 022 Fe4 4\_554 . . 136.91(13) ?  
Fe3 022 K1 4\_554 . 4\_553 75.17(7) ?  
Fe4 022 K1 . . 4\_553 147.91(10) ?  
Fe4 023 Fe6 . . . 128.63(12) ?  
Fe4 023 H23 . . . 110(4) ?  
Fe6 023 H23 . . . 108(4) ?  
Fe1 024 K1 . . 3\_668 123.80(11) ?  
Fe1 024 H24a . . . 133(3) ?  
Fe1 024 H24b . . . 85(3) ?  
K1 024 H24a 3\_668 . . 103(3) ?  
K1 024 H24b 3\_668 . . 75(4) ?  
H24a 024 H24b . . . 109(4) ?  
Fe1 025 H25a . . . 104(3) ?  
Fe1 025 H25b . . . 99(3) ?  
H25a 025 H25b . . . 109(4) ?  
Fe2 026 H26a . . . 106(3) ?  
Fe2 026 H26b . . . 103(3) ?  
H26a 026 H26b . . . 109(4) ?  
Fe2 027 K1 . . 3\_566 131.18(13) ?  
Fe2 027 H27a . . . 68(3) ?  
Fe2 027 H27b . . . 126(3) ?  
K1 027 H27a 3\_566 . . 80(4) ?  
K1 027 H27b 3\_566 . . 99(4) ?  
H27a 027 H27b . . . 109(4) ?

Fe5 028 K1 . . . 3\_667 96.16(8) ?  
 Fe5 028 H28a . . . 119(3) ?  
 Fe5 028 H28b . . . 113(3) ?  
 K1 028 H28a 3\_667 . . . 65(3) ?  
 K1 028 H28b 3\_667 . . . 147(3) ?  
 H28a 028 H28b . . . 109(4) ?  
 Fe6 029 H29a . . . 122(3) ?  
 Fe6 029 H29b . . . 128(3) ?  
 H29a 029 H29b . . . 109(4) ?  
 K1 030 H30a 3\_668 . . . 113(3) ?  
 K1 031 H31a . . . 63(3) ?  
 K1 031 H31b . . . 94(3) ?  
 H31a 031 H31b . . . 109(4) ?  
 H32a 032 H32b . . . 109(5) ?  
 H33a 033 H33b . . . 109(3) ?  
 K1 H28a 028 3\_667 . . . 102(3) ?  
 Fe2 H26a 026 . . . 55(2) ?  
 Fe2 H27a K1 . . . 3\_566 141.7(18) ?  
 Fe2 H27a 027 . . . 90(4) ?  
 K1 H27a 027 3\_566 . . . 83(3) ?  
 K1 H24a 024 3\_668 . . . 62(3) ?  
 Fe3 H20 Fe4 . . . 77.2(15) ?  
 Fe3 H20 020 . . . 53(3) ?  
 Fe4 H20 020 . . . 44(3) ?  
 K1 H31a 031 . . . 105(3) ?  
 Fe3 H21 Fe4 . . . 77.8(15) ?  
 Fe3 H21 K1 . . . 1\_554 89.2(13) ?  
 Fe3 H21 021 . . . 45(3) ?  
 Fe4 H21 K1 . . . 1\_554 125(2) ?  
 Fe4 H21 021 . . . 55(3) ?  
 K1 H21 021 1\_554 . . . 79(3) ?  
 O32 H32a H32b . . . 35(3) ?  
 Fe1 H24b K1 . . . 3\_668 124.3(18) ?  
 Fe1 H24b 024 . . . 73(2) ?  
 K1 H24b 024 3\_668 . . . 88(4) ?  
 K1 H31b 031 . . . 74(3) ?  
 K1 H30a 030 3\_668 . . . 55(3) ?  
 K1 H27b 027 3\_566 . . . 66(3) ?  
 Fe3 H19 Fe5 4\_555 . . . 96.9(9) ?  
 Fe3 H19 K1 4\_555 . 1\_554 134.6(19) ?  
 Fe3 H19 019 4\_555 . . . 40(3) ?  
 Fe5 H19 K1 . . . 1\_554 108.4(17) ?  
 Fe5 H19 019 . . . 60(3) ?  
 K1 H19 019 1\_554 . . . 130(4) ?  
 Fe1 H25a 025 . . . 57(2) ?  
 Fe1 H25b 025 . . . 60(3) ?  
 Fe2 H26b 026 . . . 57(3) ?  
 O32 H32b H32a . . . 35(3) ?  
 Fe2 H18 Fe6 . . . 3\_565 96.4(10) ?  
 Fe2 H18 018 . . . 50(3) ?  
 Fe6 H18 018 3\_565 . . . 53(3) ?  
 Fe4 H23 Fe6 . . . 97.9(11) ?  
 Fe4 H23 023 . . . 52(3) ?  
 Fe6 H23 023 . . . 53(3) ?

## regerite.cif

Fe1 H17 Fe5 . . 3\_667 99.0(10) ?  
 Fe1 H17 K1 . . . 75.4(13) ?  
 Fe1 H17 K1 . . 3\_668 97.2(16) ?  
 Fe1 H17 O17 . . . 45(3) ?  
 Fe5 H17 K1 3\_667 . . 106.6(15) ?  
 Fe5 H17 K1 3\_667 . 3\_668 130(2) ?  
 Fe5 H17 O17 3\_667 . . 61(3) ?  
 K1 H17 K1 . . 3\_668 123.3(14) ?  
 K1 H17 O17 . . . 67(3) ?  
 K1 H17 O17 3\_668 . . 140(4) ?

## loop\_

\_geom\_torsion\_atom\_site\_label\_1  
 \_geom\_torsion\_atom\_site\_label\_2  
 \_geom\_torsion\_atom\_site\_label\_3  
 \_geom\_torsion\_atom\_site\_label\_4  
 \_geom\_torsion\_site\_symmetry\_1  
 \_geom\_torsion\_site\_symmetry\_2  
 \_geom\_torsion\_site\_symmetry\_3  
 \_geom\_torsion\_site\_symmetry\_4  
 \_geom\_torsion  
 \_geom\_torsion\_publ\_flag  
 ? ? ? ? ? ? ? ? ? ?

## loop\_

\_geom\_hbond\_atom\_site\_label\_D  
 \_geom\_hbond\_atom\_site\_label\_H  
 \_geom\_hbond\_atom\_site\_label\_A  
 \_geom\_hbond\_site\_symmetry\_D  
 \_geom\_hbond\_site\_symmetry\_H  
 \_geom\_hbond\_site\_symmetry\_A  
 \_geom\_hbond\_distance\_DH  
 \_geom\_hbond\_distance\_HA  
 \_geom\_hbond\_distance\_DA  
 \_geom\_hbond\_angle\_DHA  
 \_geom\_hbond\_publ\_flag  
 028 H28a O31 . . 3\_667 0.83(4) 1.99(4) 2.783(4) 161(4) ?  
 029 H29a O31 . . 3\_566 0.85(4) 1.94(4) 2.774(4) 168(4) ?  
 028 H28b O33 . . . 0.84(4) 1.82(4) 2.657(4) 179(4) ?  
 026 H26a O10 . . 1\_554 0.84(4) 1.83(4) 2.657(3) 165(5) ?  
 027 H27a O12 . . 1\_554 0.83(3) 2.44(5) 2.866(4) 113(5) ?  
 027 H27a O30 . . 1\_453 0.83(3) 2.48(4) 3.201(4) 146(4) ?  
 024 H24a O32 . . . 0.85(3) 1.90(3) 2.653(4) 146(4) ?  
 020 H20 O1 . . 4\_555 0.84(5) 1.88(4) 2.697(4) 165(5) ?  
 031 H31a O3 . . 1\_556 0.84(4) 2.07(4) 2.869(3) 159(4) ?  
 029 H29b O33 . . 4\_454 0.84(4) 2.10(4) 2.790(4) 139(3) ?  
 021 H21 O5 . . 1\_554 0.83(5) 1.93(5) 2.744(4) 170(5) ?  
 032 H32a O20 . . 2\_656 0.76(3) 2.02(3) 2.771(3) 169(5) ?  
 024 H24b O17 . . . 0.84(3) 2.50(4) 2.939(4) 114(3) ?  
 033 H33a O30 . . 4\_554 0.88(3) 1.98(4) 2.791(4) 154(3) ?  
 031 H31b O8 . . . 0.84(4) 1.97(4) 2.768(3) 157(4) ?  
 030 H30a O26 . . 1\_657 0.84(4) 2.41(4) 3.165(4) 150(4) ?  
 027 H27b O32 . . 1\_453 0.84(2) 1.98(2) 2.781(4) 159(4) ?  
 019 H19 O14 . . . 0.82(2) 2.17(3) 2.966(4) 163(5) ?

regerite.cif

025 H25a 015 . . 1\_556 0.84(4) 1.81(4) 2.644(3) 168(4) ?  
 025 H25b 07 . . . 0.84(3) 1.89(4) 2.701(3) 162(4) ?  
 026 H26b 04 . . . 0.85(3) 1.94(4) 2.745(3) 159(5) ?  
 032 H32b 02 . . 3\_666 0.77(4) 2.39(4) 2.990(4) 135(4) ?  
 032 H32b 018 . . 3\_666 0.77(4) 2.22(4) 2.923(3) 152(4) ?  
 018 H18 012 . . 3\_565 0.85(2) 2.05(3) 2.849(4) 158(5) ?  
 023 H23 09 . . . 0.81(3) 2.27(3) 2.961(4) 143(5) ?  
 017 H17 016 . . 3\_667 0.84(3) 2.08(3) 2.868(4) 158(5) ?

#=====

# 11. STRUCTURE-FACTOR LIST

loop\_  
 \_refln\_index\_h  
 \_refln\_index\_k  
 \_refln\_index\_l  
 \_refln\_F\_squared\_calc  
 \_refln\_F\_squared\_meas  
 \_refln\_F\_squared\_sigma  
 \_refln\_observed\_status

|    |   |   |           |           |         |   |
|----|---|---|-----------|-----------|---------|---|
| 1  | 0 | 0 | 134.18    | -127.54   | 10.99   | < |
| 2  | 0 | 0 | 217053.00 | 120833.00 | 7584.09 | o |
| 3  | 0 | 0 | 163.05    | 63.77     | 13.19   | o |
| 4  | 0 | 0 | 21813.50  | 20830.40  | 932.34  | o |
| 5  | 0 | 0 | 8951.83   | 8195.39   | 373.82  | o |
| 6  | 0 | 0 | 11677.70  | 9668.67   | 435.39  | o |
| 7  | 0 | 0 | 10169.60  | 9444.38   | 604.70  | o |
| 8  | 0 | 0 | 54401.20  | 52402.60  | 2333.06 | o |
| 9  | 0 | 0 | 17431.40  | 18202.70  | 815.80  | o |
| 10 | 0 | 0 | 67777.00  | 64791.30  | 2884.99 | o |
| 11 | 0 | 0 | 15081.30  | 15344.10  | 690.46  | o |
| 12 | 0 | 0 | 2505.68   | 2410.02   | 116.54  | o |
| 13 | 0 | 0 | 2646.20   | 2647.50   | 180.31  | o |
| 14 | 0 | 0 | 9862.90   | 9906.15   | 450.78  | o |
| 15 | 0 | 0 | 495.33    | 488.16    | 37.38   | o |
| 16 | 0 | 0 | 164.33    | 151.73    | 19.79   | o |
| 17 | 0 | 0 | 651.79    | 668.47    | 46.18   | o |
| 18 | 0 | 0 | 6671.29   | 7230.06   | 488.16  | o |
| 19 | 0 | 0 | 37.74     | 65.97     | 17.59   | o |
| 20 | 0 | 0 | 252.97    | 395.81    | 37.38   | o |
| 1  | 1 | 0 | 31138.30  | 30661.80  | 1112.66 | o |
| 2  | 1 | 0 | 505.88    | 365.02    | 13.19   | o |
| 3  | 1 | 0 | 18813.80  | 18257.70  | 666.27  | o |
| 4  | 1 | 0 | 490.24    | 549.73    | 21.99   | o |
| 5  | 1 | 0 | 125790.00 | 114962.00 | 3606.23 | o |
| 6  | 1 | 0 | 757.66    | 567.32    | 24.19   | o |
| 7  | 1 | 0 | 19278.80  | 22253.10  | 996.11  | o |
| 8  | 1 | 0 | 1269.47   | 1139.04   | 43.98   | o |
| 9  | 1 | 0 | 73193.80  | 70724.00  | 2225.31 | o |
| 10 | 1 | 0 | 1356.11   | 1374.33   | 52.77   | o |
| 11 | 1 | 0 | 29782.50  | 29030.20  | 919.15  | o |
| 12 | 1 | 0 | 654.34    | 617.90    | 28.59   | o |



## regerite.cif

|    |   |   |          |          |           |
|----|---|---|----------|----------|-----------|
| 13 | 1 | 0 | 184.46   | 182.51   | 19.79 o   |
| 14 | 1 | 0 | 2841.99  | 3214.83  | 129.74 o  |
| 15 | 1 | 0 | 507.64   | 439.79   | 24.19 o   |
| 16 | 1 | 0 | 787.87   | 974.12   | 41.78 o   |
| 17 | 1 | 0 | 661.44   | 690.46   | 32.98 o   |
| 18 | 1 | 0 | 219.18   | 299.05   | 35.18 o   |
| 19 | 1 | 0 | 178.35   | 189.11   | 17.59 o   |
| 20 | 1 | 0 | 7003.88  | 7238.86  | 1589.82 o |
| 0  | 2 | 0 | 12830.20 | 13558.60 | 598.11 o  |
| 1  | 2 | 0 | 455.55   | 305.65   | 15.39 o   |
| 2  | 2 | 0 | 17190.30 | 15695.90 | 571.72 o  |
| 3  | 2 | 0 | 3596.36  | 2836.61  | 107.75 o  |
| 4  | 2 | 0 | 3257.89  | 2772.84  | 107.75 o  |
| 5  | 2 | 0 | 1920.25  | 1774.53  | 70.37 o   |
| 6  | 2 | 0 | 5748.51  | 4564.97  | 149.53 o  |
| 7  | 2 | 0 | 8.52     | 17.59    | 13.19 <   |
| 8  | 2 | 0 | 1174.58  | 1277.57  | 57.17 o   |
| 9  | 2 | 0 | 3410.44  | 3261.00  | 109.95 o  |
| 10 | 2 | 0 | 12353.30 | 11234.30 | 360.62 o  |
| 11 | 2 | 0 | 1712.19  | 1479.88  | 54.97 o   |
| 12 | 2 | 0 | 8327.11  | 7894.14  | 255.07 o  |
| 13 | 2 | 0 | 5445.61  | 5246.63  | 244.08 o  |
| 14 | 2 | 0 | 2693.49  | 3140.06  | 158.32 o  |
| 15 | 2 | 0 | 1094.65  | 1086.27  | 46.18 o   |
| 16 | 2 | 0 | 749.95   | 749.83   | 35.18 o   |
| 17 | 2 | 0 | 305.77   | 318.84   | 21.99 o   |
| 18 | 2 | 0 | 5200.58  | 5684.22  | 272.67 o  |
| 19 | 2 | 0 | 423.23   | 437.59   | 26.39 o   |
| 20 | 2 | 0 | 7926.80  | 7933.72  | 305.65 o  |
| 1  | 3 | 0 | 27420.10 | 24744.50 | 782.82 o  |
| 2  | 3 | 0 | 485.68   | 233.09   | 13.19 o   |
| 3  | 3 | 0 | 11035.60 | 11199.10 | 354.03 o  |
| 4  | 3 | 0 | 195.33   | 305.65   | 19.79 o   |
| 5  | 3 | 0 | 2808.60  | 2781.64  | 92.35 o   |
| 6  | 3 | 0 | 1918.29  | 1552.44  | 65.97 o   |
| 7  | 3 | 0 | 12244.40 | 10798.90 | 367.22 o  |
| 8  | 3 | 0 | 5226.55  | 4747.48  | 224.29 o  |
| 9  | 3 | 0 | 2376.75  | 2737.66  | 94.55 o   |
| 10 | 3 | 0 | 234.41   | 175.91   | 17.59 o   |
| 11 | 3 | 0 | 3860.62  | 4199.94  | 140.73 o  |
| 12 | 3 | 0 | 2110.60  | 2337.46  | 83.56 o   |
| 13 | 3 | 0 | 8756.92  | 8621.98  | 389.21 o  |
| 14 | 3 | 0 | 2194.26  | 2273.69  | 120.94 o  |
| 15 | 3 | 0 | 3339.29  | 3480.90  | 120.94 o  |
| 16 | 3 | 0 | 6.58     | 19.79    | 10.99 <   |
| 17 | 3 | 0 | 699.78   | 646.48   | 37.38 o   |
| 18 | 3 | 0 | 1599.76  | 1734.95  | 79.16 o   |
| 19 | 3 | 0 | 63.14    | 74.76    | 13.19 o   |
| 20 | 3 | 0 | 659.66   | 646.48   | 529.94 <  |
| 0  | 4 | 0 | 11599.70 | 9158.52  | 413.40 o  |
| 1  | 4 | 0 | 18.64    | -65.97   | 8.80 <    |
| 2  | 4 | 0 | 38198.70 | 33749.10 | 1064.28 o |
| 3  | 4 | 0 | 59.12    | 13.19    | 8.80 <    |
| 4  | 4 | 0 | 7606.18  | 6928.81  | 222.09 o  |

## regerite.cif

|    |   |   |          |          |           |
|----|---|---|----------|----------|-----------|
| 5  | 4 | 0 | 6.73     | -4.40    | 8.80 <    |
| 6  | 4 | 0 | 122.81   | 422.19   | 32.98 o   |
| 7  | 4 | 0 | 2831.01  | 2766.25  | 101.15 o  |
| 8  | 4 | 0 | 37622.20 | 38472.40 | 1721.76 o |
| 9  | 4 | 0 | 3464.96  | 3188.44  | 107.75 o  |
| 10 | 4 | 0 | 8218.90  | 8545.02  | 272.67 o  |
| 11 | 4 | 0 | 587.34   | 760.83   | 35.18 o   |
| 12 | 4 | 0 | 6344.99  | 7071.74  | 233.09 o  |
| 13 | 4 | 0 | 10800.40 | 12432.70 | 428.79 o  |
| 14 | 4 | 0 | 6920.96  | 7590.69  | 290.26 o  |
| 15 | 4 | 0 | 544.08   | 525.54   | 28.59 o   |
| 16 | 4 | 0 | 2087.21  | 2130.76  | 81.36 o   |
| 17 | 4 | 0 | 532.88   | 463.97   | 35.18 o   |
| 18 | 4 | 0 | 8662.90  | 9046.37  | 299.05 o  |
| 19 | 4 | 0 | 121.75   | 103.35   | 15.39 o   |
| 20 | 4 | 0 | 3209.49  | 2990.54  | 145.13 o  |
| 1  | 5 | 0 | 49841.00 | 39653.20 | 1251.19 o |
| 2  | 5 | 0 | 66.97    | 72.56    | 10.99 o   |
| 3  | 5 | 0 | 1931.88  | 1618.41  | 59.37 o   |
| 4  | 5 | 0 | 650.83   | 483.76   | 24.19 o   |
| 5  | 5 | 0 | 45728.60 | 41359.60 | 1299.56 o |
| 6  | 5 | 0 | 203.08   | 222.09   | 15.39 o   |
| 7  | 5 | 0 | 60405.90 | 56824.60 | 2264.89 o |
| 8  | 5 | 0 | 2925.37  | 3293.99  | 129.74 o  |
| 9  | 5 | 0 | 2293.67  | 2099.97  | 79.16 o   |
| 10 | 5 | 0 | 48.70    | 57.17    | 15.39 o   |
| 11 | 5 | 0 | 2395.06  | 2944.36  | 101.15 o  |
| 12 | 5 | 0 | 2630.20  | 2990.54  | 105.55 o  |
| 13 | 5 | 0 | 43819.70 | 45517.70 | 1539.25 o |
| 14 | 5 | 0 | 42.46    | 61.57    | 15.39 o   |
| 15 | 5 | 0 | 1343.67  | 1433.70  | 59.37 o   |
| 16 | 5 | 0 | 4201.15  | 4743.08  | 160.52 o  |
| 17 | 5 | 0 | 394.29   | 409.00   | 28.59 o   |
| 18 | 5 | 0 | 3972.89  | 4358.27  | 149.53 o  |
| 19 | 5 | 0 | 2468.94  | 2590.33  | 96.75 o   |
| 20 | 5 | 0 | 253.81   | 180.31   | 28.59 o   |
| 0  | 6 | 0 | 24794.80 | 22829.20 | 1022.50 o |
| 1  | 6 | 0 | 0.96     | -4.40    | 8.80 <    |
| 2  | 6 | 0 | 47396.60 | 39972.00 | 1262.18 o |
| 3  | 6 | 0 | 235.13   | 261.67   | 17.59 o   |
| 4  | 6 | 0 | 8514.29  | 6130.60  | 200.10 o  |
| 5  | 6 | 0 | 143.47   | 127.54   | 15.39 o   |
| 6  | 6 | 0 | 16.87    | 52.77    | 10.99 o   |
| 7  | 6 | 0 | 11946.90 | 12296.40 | 455.18 o  |
| 8  | 6 | 0 | 12527.90 | 12929.70 | 413.40 o  |
| 9  | 6 | 0 | 1398.03  | 1497.47  | 65.97 o   |
| 10 | 6 | 0 | 69.87    | 116.54   | 15.39 o   |
| 11 | 6 | 0 | 391.16   | 402.40   | 30.78 o   |
| 12 | 6 | 0 | 16903.00 | 18163.10 | 675.07 o  |
| 13 | 6 | 0 | 7049.62  | 7452.15  | 310.05 o  |
| 14 | 6 | 0 | 379.25   | 459.58   | 28.59 o   |
| 15 | 6 | 0 | 126.61   | 120.94   | 17.59 o   |
| 16 | 6 | 0 | 6970.26  | 8008.48  | 263.87 o  |
| 17 | 6 | 0 | 462.05   | 437.59   | 28.59 o   |

## regerite.cif

|    |   |   |           |           |           |
|----|---|---|-----------|-----------|-----------|
| 18 | 6 | 0 | 874.93    | 809.20    | 39.58 o   |
| 19 | 6 | 0 | 2193.67   | 2159.34   | 83.56 o   |
| 1  | 7 | 0 | 114.40    | 395.81    | 21.99 o   |
| 2  | 7 | 0 | 78.51     | 30.78     | 10.99 <   |
| 3  | 7 | 0 | 15578.60  | 13692.70  | 554.13 o  |
| 4  | 7 | 0 | 681.82    | 712.45    | 37.38 o   |
| 5  | 7 | 0 | 60635.20  | 54282.60  | 1706.36 o |
| 6  | 7 | 0 | 22.45     | 21.99     | 13.19 <   |
| 7  | 7 | 0 | 117958.00 | 119632.00 | 3755.76 o |
| 8  | 7 | 0 | 2642.02   | 2616.72   | 92.35 o   |
| 9  | 7 | 0 | 5126.01   | 5704.01   | 186.91 o  |
| 10 | 7 | 0 | 615.60    | 648.68    | 32.98 o   |
| 11 | 7 | 0 | 851.27    | 894.96    | 46.18 o   |
| 12 | 7 | 0 | 3035.62   | 3687.59   | 142.93 o  |
| 13 | 7 | 0 | 308.27    | 338.63    | 37.38 o   |
| 14 | 7 | 0 | 170.75    | 171.52    | 19.79 o   |
| 15 | 7 | 0 | 5119.46   | 5818.35   | 195.70 o  |
| 16 | 7 | 0 | 6422.48   | 7296.03   | 244.08 o  |
| 17 | 7 | 0 | 573.99    | 547.53    | 32.98 o   |
| 18 | 7 | 0 | 4929.57   | 5857.93   | 197.90 o  |
| 19 | 7 | 0 | 1535.70   | 1196.21   | 54.97 o   |
| 0  | 8 | 0 | 11124.80  | 10968.20  | 712.45 o  |
| 1  | 8 | 0 | 548.07    | 389.21    | 32.98 o   |
| 2  | 8 | 0 | 53409.00  | 50232.20  | 2240.70 o |
| 3  | 8 | 0 | 43.12     | 48.38     | 13.19 o   |
| 4  | 8 | 0 | 20232.60  | 20337.80  | 646.48 o  |
| 5  | 8 | 0 | 13.43     | 8.80      | 17.59 <   |
| 6  | 8 | 0 | 8114.10   | 9017.79   | 290.26 o  |
| 7  | 8 | 0 | 5013.71   | 4848.63   | 162.72 o  |
| 8  | 8 | 0 | 2387.58   | 2392.43   | 85.76 o   |
| 9  | 8 | 0 | 13.91     | 13.19     | 10.99 <   |
| 10 | 8 | 0 | 496.95    | 507.95    | 28.59 o   |
| 11 | 8 | 0 | 227.38    | 259.47    | 24.19 o   |
| 12 | 8 | 0 | 1037.16   | 1178.62   | 50.58 o   |
| 13 | 8 | 0 | 4721.27   | 5479.72   | 211.10 o  |
| 14 | 8 | 0 | 1611.03   | 1668.98   | 65.97 o   |
| 15 | 8 | 0 | 135.96    | 180.31    | 26.39 o   |
| 16 | 8 | 0 | 3024.26   | 3115.87   | 129.74 o  |
| 17 | 8 | 0 | 405.45    | 468.37    | 30.78 o   |
| 18 | 8 | 0 | 2312.52   | 2390.23   | 90.16 o   |
| 19 | 8 | 0 | 1710.51   | 1517.26   | 1015.90 < |
| 1  | 9 | 0 | 703.05    | 675.07    | 32.98 o   |
| 2  | 9 | 0 | 1734.85   | 1774.53   | 68.17 o   |
| 3  | 9 | 0 | 19472.20  | 18627.10  | 842.19 o  |
| 4  | 9 | 0 | 7.35      | 10.99     | 15.39 <   |
| 5  | 9 | 0 | 75127.60  | 70702.00  | 2225.31 o |
| 6  | 9 | 0 | 3054.84   | 2944.36   | 103.35 o  |
| 7  | 9 | 0 | 3152.36   | 3120.27   | 109.95 o  |
| 8  | 9 | 0 | 11.40     | 30.78     | 13.19 <   |
| 9  | 9 | 0 | 700.75    | 723.45    | 35.18 o   |
| 10 | 9 | 0 | 188.75    | 197.90    | 19.79 o   |
| 11 | 9 | 0 | 4409.63   | 4971.77   | 193.51 o  |
| 12 | 9 | 0 | 325.98    | 373.82    | 30.78 o   |
| 13 | 9 | 0 | 19100.30  | 22569.80  | 719.05 o  |

## regerite.cif

|    |    |   |          |          |           |
|----|----|---|----------|----------|-----------|
| 14 | 9  | 0 | 2363.93  | 2522.17  | 103.35 o  |
| 15 | 9  | 0 | 1924.32  | 2308.87  | 98.95 o   |
| 16 | 9  | 0 | 185.85   | 241.88   | 32.98 o   |
| 17 | 9  | 0 | 35.19    | 35.18    | 17.59 <   |
| 18 | 9  | 0 | 460.23   | 433.19   | 28.59 o   |
| 19 | 9  | 0 | 188.22   | 162.72   | 30.78 o   |
| 0  | 10 | 0 | 22924.70 | 19135.00 | 1231.40 o |
| 1  | 10 | 0 | 376.42   | 389.21   | 30.78 o   |
| 2  | 10 | 0 | 5369.08  | 5242.23  | 175.91 o  |
| 3  | 10 | 0 | 434.42   | 371.62   | 24.19 o   |
| 4  | 10 | 0 | 106.53   | 118.74   | 15.39 o   |
| 5  | 10 | 0 | 69.79    | 94.55    | 15.39 o   |
| 6  | 10 | 0 | 63472.90 | 61921.70 | 1950.45 o |
| 7  | 10 | 0 | 180.84   | 200.10   | 19.79 o   |
| 8  | 10 | 0 | 14.33    | 19.79    | 15.39 <   |
| 9  | 10 | 0 | 795.79   | 767.42   | 39.58 o   |
| 10 | 10 | 0 | 4969.69  | 5288.41  | 206.70 o  |
| 11 | 10 | 0 | 87.33    | 85.76    | 17.59 o   |
| 12 | 10 | 0 | 425.84   | 521.15   | 30.78 o   |
| 13 | 10 | 0 | 2.31     | 17.59    | 13.19 <   |
| 14 | 10 | 0 | 10712.10 | 13011.00 | 422.19 o  |
| 15 | 10 | 0 | 2522.58  | 2733.26  | 118.74 o  |
| 16 | 10 | 0 | 1333.64  | 1589.82  | 90.16 o   |
| 17 | 10 | 0 | 269.59   | 255.07   | 26.39 o   |
| 18 | 10 | 0 | 691.80   | 664.08   | 50.58 o   |
| 1  | 11 | 0 | 11584.10 | 10229.40 | 332.04 o  |
| 2  | 11 | 0 | 29.28    | 13.19    | 10.99 <   |
| 3  | 11 | 0 | 480.82   | 481.56   | 28.59 o   |
| 4  | 11 | 0 | 0.87     | 4.40     | 10.99 <   |
| 5  | 11 | 0 | 1921.37  | 1596.42  | 127.54 o  |
| 6  | 11 | 0 | 3376.65  | 3417.13  | 120.94 o  |
| 7  | 11 | 0 | 6975.75  | 6728.71  | 224.29 o  |
| 8  | 11 | 0 | 127.64   | 149.53   | 19.79 o   |
| 9  | 11 | 0 | 1089.35  | 1198.41  | 63.77 o   |
| 10 | 11 | 0 | 492.67   | 532.14   | 32.98 o   |
| 11 | 11 | 0 | 15377.80 | 17367.10 | 646.48 o  |
| 12 | 11 | 0 | 452.61   | 481.56   | 30.78 o   |
| 13 | 11 | 0 | 10867.70 | 12470.10 | 404.60 o  |
| 14 | 11 | 0 | 1518.73  | 1728.35  | 70.37 o   |
| 15 | 11 | 0 | 8876.81  | 10502.10 | 393.61 o  |
| 16 | 11 | 0 | 1079.53  | 1240.19  | 54.97 o   |
| 17 | 11 | 0 | 1098.64  | 1128.05  | 52.77 o   |
| 18 | 11 | 0 | 108.09   | 72.56    | 26.39 <   |
| 0  | 12 | 0 | 8029.12  | 7683.04  | 362.82 o  |
| 1  | 12 | 0 | 1162.06  | 1176.42  | 50.58 o   |
| 2  | 12 | 0 | 6452.68  | 6198.77  | 206.70 o  |
| 3  | 12 | 0 | 118.52   | 90.16    | 15.39 o   |
| 4  | 12 | 0 | 5616.41  | 5376.37  | 180.31 o  |
| 5  | 12 | 0 | 714.52   | 609.10   | 52.77 o   |
| 6  | 12 | 0 | 9366.66  | 9184.90  | 299.05 o  |
| 7  | 12 | 0 | 590.73   | 567.32   | 32.98 o   |
| 8  | 12 | 0 | 1293.53  | 1396.32  | 70.37 o   |
| 9  | 12 | 0 | 5054.77  | 5424.74  | 182.51 o  |
| 10 | 12 | 0 | 67.37    | 81.36    | 21.99 o   |

## regerite.cif

|    |    |   |          |          |           |
|----|----|---|----------|----------|-----------|
| 11 | 12 | 0 | 7096.98  | 7768.80  | 257.27 o  |
| 12 | 12 | 0 | 134.16   | 149.53   | 19.79 o   |
| 13 | 12 | 0 | 690.61   | 694.86   | 39.58 o   |
| 14 | 12 | 0 | 952.71   | 879.57   | 48.38 o   |
| 15 | 12 | 0 | 680.43   | 813.60   | 52.77 o   |
| 16 | 12 | 0 | 1822.90  | 1827.31  | 74.76 o   |
| 17 | 12 | 0 | 445.14   | 494.76   | 41.78 o   |
| 1  | 13 | 0 | 2340.42  | 2772.84  | 101.15 o  |
| 2  | 13 | 0 | 444.50   | 371.62   | 26.39 o   |
| 3  | 13 | 0 | 3506.77  | 3419.33  | 123.14 o  |
| 4  | 13 | 0 | 3072.87  | 2955.35  | 107.75 o  |
| 5  | 13 | 0 | 26144.70 | 26417.90 | 839.99 o  |
| 6  | 13 | 0 | 372.61   | 433.19   | 41.78 o   |
| 7  | 13 | 0 | 15731.50 | 14913.10 | 554.13 o  |
| 8  | 13 | 0 | 1545.46  | 1640.40  | 68.17 o   |
| 9  | 13 | 0 | 24101.50 | 24304.70 | 980.72 o  |
| 10 | 13 | 0 | 488.67   | 488.16   | 32.98 o   |
| 11 | 13 | 0 | 4255.21  | 4571.56  | 158.32 o  |
| 12 | 13 | 0 | 14.17    | 10.99    | 15.39 <   |
| 13 | 13 | 0 | 249.95   | 263.87   | 30.78 o   |
| 14 | 13 | 0 | 3546.53  | 4285.70  | 173.71 o  |
| 15 | 13 | 0 | 588.32   | 602.51   | 37.38 o   |
| 16 | 13 | 0 | 1200.88  | 1167.63  | 54.97 o   |
| 17 | 13 | 0 | 1773.31  | 2047.20  | 156.12 o  |
| 0  | 14 | 0 | 76568.10 | 77703.40 | 3995.44 o |
| 1  | 14 | 0 | 223.29   | 239.68   | 24.19 o   |
| 2  | 14 | 0 | 9611.46  | 9886.36  | 325.44 o  |
| 3  | 14 | 0 | 1975.01  | 2042.80  | 79.16 o   |
| 4  | 14 | 0 | 2515.40  | 2742.06  | 103.35 o  |
| 5  | 14 | 0 | 354.01   | 294.66   | 30.78 o   |
| 6  | 14 | 0 | 548.18   | 664.08   | 39.58 o   |
| 7  | 14 | 0 | 145.37   | 134.13   | 24.19 o   |
| 8  | 14 | 0 | 2778.02  | 2805.83  | 120.94 o  |
| 9  | 14 | 0 | 3269.97  | 3230.22  | 116.54 o  |
| 10 | 14 | 0 | 896.23   | 914.75   | 54.97 o   |
| 11 | 14 | 0 | 437.89   | 437.59   | 30.78 o   |
| 12 | 14 | 0 | 30.30    | 79.16    | 21.99 o   |
| 13 | 14 | 0 | 88.21    | 59.37    | 19.79 o   |
| 14 | 14 | 0 | 698.97   | 677.27   | 39.58 o   |
| 15 | 14 | 0 | 460.14   | 419.99   | 30.78 o   |
| 16 | 14 | 0 | 79.83    | 98.95    | 24.19 o   |
| 1  | 15 | 0 | 4804.05  | 4593.55  | 186.91 o  |
| 2  | 15 | 0 | 171.60   | 202.30   | 35.18 o   |
| 3  | 15 | 0 | 332.50   | 301.25   | 30.78 o   |
| 4  | 15 | 0 | 410.78   | 373.82   | 26.39 o   |
| 5  | 15 | 0 | 1048.53  | 987.32   | 48.38 o   |
| 6  | 15 | 0 | 197.43   | 180.31   | 24.19 o   |
| 7  | 15 | 0 | 7315.12  | 7949.11  | 263.87 o  |
| 8  | 15 | 0 | 404.02   | 441.98   | 30.78 o   |
| 9  | 15 | 0 | 3205.99  | 3210.43  | 116.54 o  |
| 10 | 15 | 0 | 931.93   | 987.32   | 48.38 o   |
| 11 | 15 | 0 | 6996.62  | 6904.62  | 235.29 o  |
| 12 | 15 | 0 | 393.73   | 285.86   | 26.39 o   |
| 13 | 15 | 0 | 297.92   | 239.68   | 24.19 o   |

## regerite.cif

|    |    |   |          |          |          |
|----|----|---|----------|----------|----------|
| 14 | 15 | 0 | 75.08    | 76.96    | 17.59 o  |
| 15 | 15 | 0 | 2228.20  | 2117.56  | 92.35 o  |
| 16 | 15 | 0 | 43.21    | -4.40    | 26.39 <  |
| 0  | 16 | 0 | 5179.02  | 5022.34  | 246.28 o |
| 1  | 16 | 0 | 1.69     | -19.79   | 134.13 < |
| 2  | 16 | 0 | 7241.35  | 7091.53  | 274.86 o |
| 3  | 16 | 0 | 0.40     | 0.00     | 15.39 <  |
| 4  | 16 | 0 | 116.17   | 114.34   | 21.99 o  |
| 5  | 16 | 0 | 14.83    | 30.78    | 360.62 < |
| 6  | 16 | 0 | 9660.77  | 10073.30 | 329.84 o |
| 7  | 16 | 0 | 102.86   | 92.35    | 26.39 o  |
| 8  | 16 | 0 | 7621.17  | 8556.01  | 281.46 o |
| 9  | 16 | 0 | 302.35   | 305.65   | 26.39 o  |
| 10 | 16 | 0 | 13996.90 | 15210.00 | 573.92 o |
| 11 | 16 | 0 | 64.81    | 68.17    | 17.59 o  |
| 12 | 16 | 0 | 4448.58  | 4446.22  | 178.11 o |
| 13 | 16 | 0 | 63.23    | 85.76    | 17.59 o  |
| 14 | 16 | 0 | 36.08    | 43.98    | 17.59 <  |
| 15 | 16 | 0 | 239.98   | 338.63   | 48.38 o  |
| 1  | 17 | 0 | 19.14    | 43.98    | 15.39 <  |
| 2  | 17 | 0 | 259.56   | 241.88   | 24.19 o  |
| 3  | 17 | 0 | 183.24   | 171.52   | 21.99 o  |
| 4  | 17 | 0 | 828.78   | 791.61   | 41.78 o  |
| 5  | 17 | 0 | 4499.06  | 4589.15  | 160.52 o |
| 6  | 17 | 0 | 402.79   | 426.59   | 30.78 o  |
| 7  | 17 | 0 | 601.94   | 433.19   | 35.18 o  |
| 8  | 17 | 0 | 519.63   | 518.95   | 32.98 o  |
| 9  | 17 | 0 | 496.42   | 516.75   | 39.58 o  |
| 10 | 17 | 0 | 1177.37  | 1255.59  | 65.97 o  |
| 11 | 17 | 0 | 2833.80  | 2695.88  | 103.35 o |
| 12 | 17 | 0 | 394.52   | 323.24   | 26.39 o  |
| 13 | 17 | 0 | 1532.00  | 1482.07  | 65.97 o  |
| 14 | 17 | 0 | 39.61    | 13.19    | 24.19 <  |
| 0  | 18 | 0 | 504.90   | 518.95   | 48.38 o  |
| 1  | 18 | 0 | 1.21     | 19.79    | 15.39 <  |
| 2  | 18 | 0 | 28.88    | 52.77    | 17.59 o  |
| 3  | 18 | 0 | 376.27   | 384.81   | 28.59 o  |
| 4  | 18 | 0 | 7099.19  | 7836.96  | 259.47 o |
| 5  | 18 | 0 | 1733.76  | 1686.57  | 70.37 o  |
| 6  | 18 | 0 | 6060.83  | 6517.61  | 222.09 o |
| 7  | 18 | 0 | 920.05   | 908.16   | 48.38 o  |
| 8  | 18 | 0 | 9907.77  | 10484.50 | 398.01 o |
| 9  | 18 | 0 | 187.02   | 195.70   | 21.99 o  |
| 10 | 18 | 0 | 174.95   | 206.70   | 21.99 o  |
| 11 | 18 | 0 | 1374.47  | 1391.92  | 61.57 o  |
| 12 | 18 | 0 | 603.26   | 468.37   | 30.78 o  |
| 13 | 18 | 0 | 1284.74  | 1002.71  | 87.96 o  |
| 1  | 19 | 0 | 3034.08  | 3296.19  | 120.94 o |
| 2  | 19 | 0 | 736.99   | 804.81   | 43.98 o  |
| 3  | 19 | 0 | 7378.90  | 7979.89  | 268.27 o |
| 4  | 19 | 0 | 664.60   | 624.49   | 37.38 o  |
| 5  | 19 | 0 | 811.59   | 741.04   | 48.38 o  |
| 6  | 19 | 0 | 1282.96  | 1270.98  | 65.97 o  |
| 7  | 19 | 0 | 3347.68  | 3804.14  | 156.12 o |

## regerite.cif

|     |    |   |          |          |        |   |
|-----|----|---|----------|----------|--------|---|
| 8   | 19 | 0 | 1778.99  | 1904.27  | 90.16  | o |
| 9   | 19 | 0 | 758.55   | 850.98   | 43.98  | o |
| 10  | 19 | 0 | 125.80   | 101.15   | 17.59  | o |
| 11  | 19 | 0 | 334.16   | 239.68   | 30.78  | o |
| 12  | 19 | 0 | 492.43   | 567.32   | 68.17  | o |
| 0   | 20 | 0 | 5571.51  | 5910.71  | 413.40 | o |
| 1   | 20 | 0 | 86.18    | 43.98    | 26.39  | < |
| 2   | 20 | 0 | 8132.49  | 8835.28  | 422.19 | o |
| 3   | 20 | 0 | 30.46    | 19.79    | 17.59  | < |
| 4   | 20 | 0 | 7787.76  | 8305.33  | 281.46 | o |
| 5   | 20 | 0 | 38.15    | 37.38    | 19.79  | < |
| 6   | 20 | 0 | 98.02    | 127.54   | 19.79  | o |
| 7   | 20 | 0 | 105.27   | 92.35    | 19.79  | o |
| 8   | 20 | 0 | 376.41   | 349.63   | 28.59  | o |
| 9   | 20 | 0 | 463.54   | 463.97   | 32.98  | o |
| 10  | 20 | 0 | 16.23    | 19.79    | 19.79  | < |
| 11  | 20 | 0 | 736.93   | 749.83   | 79.16  | o |
| 1   | 21 | 0 | 17.05    | 35.18    | 17.59  | < |
| 2   | 21 | 0 | 40.92    | 30.78    | 15.39  | < |
| 3   | 21 | 0 | 1787.05  | 1862.49  | 81.36  | o |
| 4   | 21 | 0 | 398.38   | 437.59   | 32.98  | o |
| 5   | 21 | 0 | 984.63   | 1029.10  | 52.77  | o |
| 6   | 21 | 0 | 1.19     | -13.19   | 15.39  | < |
| 7   | 21 | 0 | 1712.31  | 1530.45  | 65.97  | o |
| 8   | 21 | 0 | 28.97    | 39.58    | 17.59  | < |
| 9   | 21 | 0 | 2054.97  | 1490.87  | 101.15 | o |
| 0   | 22 | 0 | 444.16   | 494.76   | 50.58  | o |
| 1   | 22 | 0 | 895.01   | 976.32   | 50.58  | o |
| 2   | 22 | 0 | 1043.04  | 952.13   | 48.38  | o |
| 3   | 22 | 0 | 212.54   | 246.28   | 24.19  | o |
| 4   | 22 | 0 | 85.86    | 76.96    | 17.59  | o |
| 5   | 22 | 0 | 6.56     | 28.59    | 17.59  | < |
| 6   | 22 | 0 | 58.93    | 105.55   | 24.19  | o |
| 7   | 22 | 0 | 206.25   | 136.33   | 32.98  | o |
| 1   | 23 | 0 | 1224.40  | 1075.27  | 52.77  | o |
| 2   | 23 | 0 | 653.01   | 617.90   | 43.98  | o |
| 3   | 23 | 0 | 4049.51  | 3454.51  | 186.91 | o |
| 4   | 23 | 0 | 257.85   | 248.48   | 35.18  | o |
| 5   | 23 | 0 | 7144.40  | 5629.24  | 538.74 | o |
| -20 | 1  | 1 | 199.43   | 182.51   | 17.59  | o |
| -19 | 1  | 1 | 802.80   | 807.01   | 39.58  | o |
| -18 | 1  | 1 | 265.44   | 272.67   | 32.98  | o |
| -17 | 1  | 1 | 220.23   | 211.10   | 17.59  | o |
| -16 | 1  | 1 | 23.10    | 35.18    | 10.99  | o |
| -15 | 1  | 1 | 1625.82  | 1750.34  | 70.37  | o |
| -14 | 1  | 1 | 9464.83  | 9246.47  | 494.76 | o |
| -13 | 1  | 1 | 278.98   | 270.47   | 26.39  | o |
| -12 | 1  | 1 | 8129.71  | 7487.33  | 281.46 | o |
| -11 | 1  | 1 | 1625.78  | 1347.94  | 59.37  | o |
| -10 | 1  | 1 | 1229.74  | 1275.38  | 48.38  | o |
| -9  | 1  | 1 | 1441.34  | 1345.74  | 57.17  | o |
| -8  | 1  | 1 | 4175.67  | 3190.64  | 107.75 | o |
| -7  | 1  | 1 | 240.52   | 131.93   | 19.79  | o |
| -6  | 1  | 1 | 27105.30 | 27420.60 | 866.38 | o |

## regerite.cif

|     |   |   |          |          |           |
|-----|---|---|----------|----------|-----------|
| -5  | 1 | 1 | 14.50    | -76.96   | 8.80 <    |
| -4  | 1 | 1 | 10203.00 | 9629.09  | 303.45 o  |
| -3  | 1 | 1 | 53.45    | 17.59    | 6.60 <    |
| -2  | 1 | 1 | 13803.70 | 15645.30 | 494.76 o  |
| -1  | 1 | 1 | 913.82   | 571.72   | 26.39 o   |
| 0   | 1 | 1 | 2790.62  | 2383.63  | 76.96 o   |
| 1   | 1 | 1 | 152.13   | 131.93   | 8.80 o    |
| 2   | 1 | 1 | 2674.99  | 2330.86  | 76.96 o   |
| 3   | 1 | 1 | 5.99     | 17.59    | 6.60 <    |
| 4   | 1 | 1 | 52814.20 | 50243.20 | 1578.83 o |
| 5   | 1 | 1 | 5351.44  | 4494.60  | 145.13 o  |
| 6   | 1 | 1 | 9008.71  | 7814.97  | 250.68 o  |
| 7   | 1 | 1 | 1039.73  | 1255.59  | 63.77 o   |
| 8   | 1 | 1 | 2213.19  | 2445.20  | 83.56 o   |
| 9   | 1 | 1 | 530.55   | 428.79   | 21.99 o   |
| 10  | 1 | 1 | 1691.19  | 1640.40  | 59.37 o   |
| 11  | 1 | 1 | 424.39   | 387.01   | 21.99 o   |
| 12  | 1 | 1 | 2934.10  | 3133.47  | 107.75 o  |
| 13  | 1 | 1 | 115.30   | 118.74   | 17.59 o   |
| 14  | 1 | 1 | 16858.10 | 17160.40 | 633.29 o  |
| 15  | 1 | 1 | 2612.07  | 2647.50  | 92.35 o   |
| 16  | 1 | 1 | 9397.74  | 9903.95  | 318.84 o  |
| 17  | 1 | 1 | 77.26    | 85.76    | 13.19 o   |
| 18  | 1 | 1 | 123.28   | 140.73   | 24.19 o   |
| 19  | 1 | 1 | 243.26   | 224.29   | 19.79 o   |
| 20  | 1 | 1 | 94.15    | 92.35    | 15.39 o   |
| -20 | 2 | 1 | 58.94    | 74.76    | 15.39 o   |
| -19 | 2 | 1 | 4518.36  | 4547.37  | 156.12 o  |
| -18 | 2 | 1 | 1507.20  | 1587.62  | 94.55 o   |
| -17 | 2 | 1 | 6356.96  | 6596.77  | 217.69 o  |
| -16 | 2 | 1 | 156.10   | 175.91   | 19.79 o   |
| -15 | 2 | 1 | 6007.09  | 6222.95  | 206.70 o  |
| -14 | 2 | 1 | 36.31    | 83.56    | 24.19 o   |
| -13 | 2 | 1 | 660.57   | 692.66   | 41.78 o   |
| -12 | 2 | 1 | 1.31     | 24.19    | 10.99 <   |
| -11 | 2 | 1 | 5331.56  | 5266.42  | 173.71 o  |
| -10 | 2 | 1 | 3386.43  | 3140.06  | 114.34 o  |
| -9  | 2 | 1 | 50.86    | 79.16    | 15.39 o   |
| -8  | 2 | 1 | 3433.17  | 2733.26  | 109.95 o  |
| -7  | 2 | 1 | 137.46   | 151.73   | 17.59 o   |
| -6  | 2 | 1 | 244.85   | 222.09   | 15.39 o   |
| -5  | 2 | 1 | 3558.90  | 3399.54  | 109.95 o  |
| -4  | 2 | 1 | 4990.39  | 4910.20  | 171.52 o  |
| -3  | 2 | 1 | 2108.56  | 3630.42  | 118.74 o  |
| -2  | 2 | 1 | 20.84    | -26.39   | 6.60 <    |
| -1  | 2 | 1 | 249.43   | 217.69   | 10.99 o   |
| 0   | 2 | 1 | 414.78   | 310.05   | 13.19 o   |
| 1   | 2 | 1 | 19176.60 | 18108.10 | 576.12 o  |
| 2   | 2 | 1 | 8.01     | -13.19   | 6.60 <    |
| 3   | 2 | 1 | 48241.30 | 44433.60 | 1394.12 o |
| 4   | 2 | 1 | 114.05   | 173.71   | 10.99 o   |
| 5   | 2 | 1 | 53683.40 | 50557.70 | 1699.77 o |
| 6   | 2 | 1 | 3202.87  | 3296.19  | 107.75 o  |
| 7   | 2 | 1 | 17671.50 | 19416.50 | 710.25 o  |



regerite.cif

|     |   |   |           |           |           |
|-----|---|---|-----------|-----------|-----------|
| 8   | 2 | 1 | 869.08    | 894.96    | 41.78 o   |
| 9   | 2 | 1 | 405.45    | 516.75    | 26.39 o   |
| 10  | 2 | 1 | 2762.90   | 2566.14   | 90.16 o   |
| 11  | 2 | 1 | 1821.00   | 1816.31   | 65.97 o   |
| 12  | 2 | 1 | 4.25      | 32.98     | 10.99 <   |
| 13  | 2 | 1 | 3974.20   | 3865.71   | 182.51 o  |
| 14  | 2 | 1 | 1931.21   | 2150.55   | 114.34 o  |
| 15  | 2 | 1 | 2401.96   | 2352.85   | 85.76 o   |
| 16  | 2 | 1 | 634.93    | 686.06    | 32.98 o   |
| 17  | 2 | 1 | 307.97    | 255.07    | 26.39 o   |
| 18  | 2 | 1 | 21.91     | 48.38     | 15.39 o   |
| 19  | 2 | 1 | 70.89     | 54.97     | 13.19 o   |
| 20  | 2 | 1 | 710.75    | 723.45    | 48.38 o   |
| -20 | 3 | 1 | 190.08    | 167.12    | 19.79 o   |
| -19 | 3 | 1 | 2194.10   | 2130.76   | 81.36 o   |
| -18 | 3 | 1 | 3405.99   | 3502.89   | 145.13 o  |
| -17 | 3 | 1 | 4207.06   | 4257.12   | 147.33 o  |
| -16 | 3 | 1 | 2771.65   | 2957.55   | 136.33 o  |
| -15 | 3 | 1 | 5574.26   | 6106.41   | 202.30 o  |
| -14 | 3 | 1 | 3916.87   | 4215.34   | 208.90 o  |
| -13 | 3 | 1 | 894.22    | 905.96    | 52.77 o   |
| -12 | 3 | 1 | 2748.54   | 2713.47   | 94.55 o   |
| -11 | 3 | 1 | 163.88    | 127.54    | 17.59 o   |
| -10 | 3 | 1 | 10483.80  | 9873.17   | 318.84 o  |
| -9  | 3 | 1 | 3944.34   | 3997.64   | 134.13 o  |
| -8  | 3 | 1 | 19782.60  | 17952.00  | 934.54 o  |
| -7  | 3 | 1 | 137.26    | 116.54    | 13.19 o   |
| -6  | 3 | 1 | 8768.69   | 7023.36   | 259.47 o  |
| -5  | 3 | 1 | 7.31      | -6.60     | 8.80 <    |
| -4  | 3 | 1 | 102065.00 | 96387.60  | 3032.32 o |
| -3  | 3 | 1 | 2.91      | 17.59     | 8.80 <    |
| -2  | 3 | 1 | 66505.80  | 67161.70  | 2124.16 o |
| -1  | 3 | 1 | 546.88    | 327.64    | 17.59 o   |
| 0   | 3 | 1 | 989.16    | 1688.77   | 59.37 o   |
| 1   | 3 | 1 | 624.59    | 419.99    | 19.79 o   |
| 2   | 3 | 1 | 162.73    | 21.99     | 13.19 <   |
| 3   | 3 | 1 | 1731.67   | 1385.32   | 48.38 o   |
| 4   | 3 | 1 | 1667.28   | 1097.26   | 41.78 o   |
| 5   | 3 | 1 | 15.47     | 39.58     | 8.80 o    |
| 6   | 3 | 1 | 210973.00 | 202391.00 | 6790.28 o |
| 7   | 3 | 1 | 743.99    | 686.06    | 32.98 o   |
| 8   | 3 | 1 | 10240.10  | 9886.36   | 367.22 o  |
| 9   | 3 | 1 | 95.80     | 118.74    | 13.19 o   |
| 10  | 3 | 1 | 819.38    | 745.43    | 32.98 o   |
| 11  | 3 | 1 | 593.22    | 560.73    | 28.59 o   |
| 12  | 3 | 1 | 3089.51   | 2946.56   | 103.35 o  |
| 13  | 3 | 1 | 2617.35   | 2555.15   | 103.35 o  |
| 14  | 3 | 1 | 1469.42   | 1675.58   | 74.76 o   |
| 15  | 3 | 1 | 1284.98   | 1420.50   | 57.17 o   |
| 16  | 3 | 1 | 4193.42   | 4582.56   | 156.12 o  |
| 17  | 3 | 1 | 310.11    | 367.22    | 28.59 o   |
| 18  | 3 | 1 | 727.09    | 657.48    | 39.58 o   |
| 19  | 3 | 1 | 76.34     | 94.55     | 15.39 o   |
| 20  | 3 | 1 | 100.06    | 87.96     | 17.59 o   |

## regerite.cif

|     |   |   |           |           |           |
|-----|---|---|-----------|-----------|-----------|
| -20 | 4 | 1 | 1177.77   | 1227.00   | 72.56 o   |
| -19 | 4 | 1 | 451.81    | 468.37    | 30.78 o   |
| -18 | 4 | 1 | 154.62    | 169.32    | 19.79 o   |
| -17 | 4 | 1 | 236.23    | 310.05    | 28.59 o   |
| -16 | 4 | 1 | 2.77      | 13.19     | 10.99 <   |
| -15 | 4 | 1 | 5076.91   | 5015.75   | 169.32 o  |
| -14 | 4 | 1 | 815.79    | 703.66    | 37.38 o   |
| -13 | 4 | 1 | 14567.00  | 15231.90  | 488.16 o  |
| -12 | 4 | 1 | 1873.60   | 1858.09   | 70.37 o   |
| -11 | 4 | 1 | 8541.14   | 9648.88   | 310.05 o  |
| -10 | 4 | 1 | 1030.44   | 989.52    | 41.78 o   |
| -9  | 4 | 1 | 95674.70  | 97282.60  | 3058.70 o |
| -8  | 4 | 1 | 508.51    | 444.18    | 21.99 o   |
| -7  | 4 | 1 | 11549.20  | 11636.70  | 373.82 o  |
| -6  | 4 | 1 | 2488.22   | 2139.55   | 118.74 o  |
| -5  | 4 | 1 | 20311.00  | 20595.10  | 655.28 o  |
| -4  | 4 | 1 | 657.28    | 727.84    | 32.98 o   |
| -3  | 4 | 1 | 27544.90  | 29824.00  | 949.93 o  |
| -2  | 4 | 1 | 375.67    | 593.71    | 24.19 o   |
| -1  | 4 | 1 | 53125.70  | 51384.40  | 1629.40 o |
| 0   | 4 | 1 | 2114.63   | 1616.21   | 54.97 o   |
| 1   | 4 | 1 | 118500.00 | 100300.00 | 3151.06 o |
| 2   | 4 | 1 | 240.23    | 261.67    | 15.39 o   |
| 3   | 4 | 1 | 3964.86   | 3863.51   | 125.34 o  |
| 4   | 4 | 1 | 1018.39   | 778.42    | 30.78 o   |
| 5   | 4 | 1 | 11062.30  | 11872.00  | 378.21 o  |
| 6   | 4 | 1 | 14379.90  | 13875.20  | 507.95 o  |
| 7   | 4 | 1 | 1154.55   | 1147.84   | 43.98 o   |
| 8   | 4 | 1 | 630.48    | 569.52    | 30.78 o   |
| 9   | 4 | 1 | 16909.60  | 15845.40  | 503.55 o  |
| 10  | 4 | 1 | 36.53     | 61.57     | 13.19 o   |
| 11  | 4 | 1 | 3281.81   | 3311.58   | 114.34 o  |
| 12  | 4 | 1 | 71.86     | 109.95    | 193.51 <  |
| 13  | 4 | 1 | 1575.14   | 1578.83   | 70.37 o   |
| 14  | 4 | 1 | 281.66    | 318.84    | 28.59 o   |
| 15  | 4 | 1 | 1936.97   | 2031.81   | 76.96 o   |
| 16  | 4 | 1 | 2031.26   | 2190.13   | 81.36 o   |
| 17  | 4 | 1 | 784.84    | 828.99    | 46.18 o   |
| 18  | 4 | 1 | 66.57     | 92.35     | 15.39 o   |
| 19  | 4 | 1 | 1657.63   | 1611.81   | 63.77 o   |
| 20  | 4 | 1 | 16.23     | 32.98     | 15.39 <   |
| -20 | 5 | 1 | 1731.98   | 1376.53   | 90.16 o   |
| -19 | 5 | 1 | 1376.94   | 1297.36   | 59.37 o   |
| -18 | 5 | 1 | 1.29      | 24.19     | 13.19 <   |
| -17 | 5 | 1 | 1.23      | 2.20      | 13.19 <   |
| -16 | 5 | 1 | 8871.96   | 9809.40   | 321.04 o  |
| -15 | 5 | 1 | 2208.28   | 2399.03   | 87.96 o   |
| -14 | 5 | 1 | 8732.68   | 8593.39   | 281.46 o  |
| -13 | 5 | 1 | 2679.80   | 2990.54   | 105.55 o  |
| -12 | 5 | 1 | 5329.02   | 5948.09   | 195.70 o  |
| -11 | 5 | 1 | 2283.80   | 2275.89   | 81.36 o   |
| -10 | 5 | 1 | 4090.12   | 3920.68   | 140.73 o  |
| -9  | 5 | 1 | 1104.59   | 1306.16   | 50.58 o   |
| -8  | 5 | 1 | 5857.34   | 6040.44   | 197.90 o  |

## regerite.cif

|     |   |   |          |          |         |   |
|-----|---|---|----------|----------|---------|---|
| -7  | 5 | 1 | 1473.41  | 1255.59  | 54.97   | o |
| -6  | 5 | 1 | 12066.00 | 12432.70 | 395.81  | o |
| -5  | 5 | 1 | 83.58    | 63.77    | 10.99   | o |
| -4  | 5 | 1 | 440.17   | 527.74   | 30.78   | o |
| -3  | 5 | 1 | 408.50   | 452.98   | 21.99   | o |
| -2  | 5 | 1 | 5906.96  | 6412.06  | 241.88  | o |
| -1  | 5 | 1 | 2092.72  | 2018.61  | 70.37   | o |
| 0   | 5 | 1 | 55669.10 | 52292.60 | 1644.79 | o |
| 1   | 5 | 1 | 1362.77  | 1268.78  | 48.38   | o |
| 2   | 5 | 1 | 83109.30 | 73290.10 | 2306.67 | o |
| 3   | 5 | 1 | 534.03   | 483.76   | 24.19   | o |
| 4   | 5 | 1 | 4904.94  | 6222.95  | 200.10  | o |
| 5   | 5 | 1 | 2547.51  | 2931.17  | 114.34  | o |
| 6   | 5 | 1 | 2032.01  | 2192.33  | 87.96   | o |
| 7   | 5 | 1 | 953.17   | 1090.67  | 48.38   | o |
| 8   | 5 | 1 | 449.44   | 514.55   | 26.39   | o |
| 9   | 5 | 1 | 55.30    | 46.18    | 10.99   | o |
| 10  | 5 | 1 | 15557.30 | 16091.70 | 512.35  | o |
| 11  | 5 | 1 | 947.40   | 1018.10  | 43.98   | o |
| 12  | 5 | 1 | 1596.18  | 1754.74  | 68.17   | o |
| 13  | 5 | 1 | 21.74    | 35.18    | 15.39   | < |
| 14  | 5 | 1 | 1669.04  | 1607.41  | 63.77   | o |
| 15  | 5 | 1 | 729.08   | 664.08   | 35.18   | o |
| 16  | 5 | 1 | 208.62   | 261.67   | 21.99   | o |
| 17  | 5 | 1 | 160.13   | 134.13   | 17.59   | o |
| 18  | 5 | 1 | 321.15   | 321.04   | 24.19   | o |
| 19  | 5 | 1 | 612.06   | 567.32   | 32.98   | o |
| 20  | 5 | 1 | 44.31    | 52.77    | 17.59   | o |
| -19 | 6 | 1 | 7883.22  | 8681.35  | 285.86  | o |
| -18 | 6 | 1 | 1277.11  | 1350.14  | 57.17   | o |
| -17 | 6 | 1 | 1734.30  | 1908.67  | 74.76   | o |
| -16 | 6 | 1 | 1978.27  | 1899.87  | 74.76   | o |
| -15 | 6 | 1 | 29.94    | 43.98    | 15.39   | < |
| -14 | 6 | 1 | 121.75   | 112.14   | 19.79   | o |
| -13 | 6 | 1 | 1379.79  | 1418.31  | 70.37   | o |
| -12 | 6 | 1 | 1657.21  | 1759.14  | 94.55   | o |
| -11 | 6 | 1 | 627.31   | 677.27   | 32.98   | o |
| -10 | 6 | 1 | 5977.98  | 6475.83  | 211.10  | o |
| -9  | 6 | 1 | 22062.80 | 23682.40 | 752.03  | o |
| -8  | 6 | 1 | 339.75   | 321.04   | 19.79   | o |
| -7  | 6 | 1 | 579.97   | 584.91   | 30.78   | o |
| -6  | 6 | 1 | 267.54   | 217.69   | 15.39   | o |
| -5  | 6 | 1 | 7112.82  | 8061.25  | 301.25  | o |
| -4  | 6 | 1 | 582.90   | 591.51   | 30.78   | o |
| -3  | 6 | 1 | 25993.10 | 27306.20 | 998.31  | o |
| -2  | 6 | 1 | 783.45   | 523.34   | 30.78   | o |
| -1  | 6 | 1 | 7453.77  | 6420.86  | 208.90  | o |
| 0   | 6 | 1 | 4037.66  | 3056.50  | 120.94  | o |
| 1   | 6 | 1 | 17135.10 | 14552.50 | 466.17  | o |
| 2   | 6 | 1 | 30.08    | 2.20     | 8.80    | < |
| 3   | 6 | 1 | 74.94    | 261.67   | 17.59   | o |
| 4   | 6 | 1 | 115.75   | 96.75    | 15.39   | o |
| 5   | 6 | 1 | 3133.25  | 3531.47  | 136.33  | o |
| 6   | 6 | 1 | 5.74     | 24.19    | 10.99   | < |

## regerite.cif

|     |   |   |          |          |           |
|-----|---|---|----------|----------|-----------|
| 7   | 6 | 1 | 30407.80 | 31523.80 | 1152.24 o |
| 8   | 6 | 1 | 207.76   | 173.71   | 15.39 o   |
| 9   | 6 | 1 | 27942.50 | 28858.70 | 914.75 o  |
| 10  | 6 | 1 | 2739.04  | 2621.12  | 92.35 o   |
| 11  | 6 | 1 | 34522.50 | 37825.90 | 1200.61 o |
| 12  | 6 | 1 | 1289.06  | 1174.23  | 59.37 o   |
| 13  | 6 | 1 | 333.35   | 459.58   | 32.98 o   |
| 14  | 6 | 1 | 5255.14  | 5653.43  | 189.11 o  |
| 15  | 6 | 1 | 556.62   | 650.88   | 35.18 o   |
| 16  | 6 | 1 | 312.72   | 334.24   | 24.19 o   |
| 17  | 6 | 1 | 1229.95  | 1141.24  | 57.17 o   |
| 18  | 6 | 1 | 109.92   | 147.33   | 17.59 o   |
| 19  | 6 | 1 | 1230.22  | 1306.16  | 57.17 o   |
| -19 | 7 | 1 | 1922.06  | 1851.49  | 74.76 o   |
| -18 | 7 | 1 | 547.62   | 569.52   | 32.98 o   |
| -17 | 7 | 1 | 1659.32  | 1627.20  | 98.95 o   |
| -16 | 7 | 1 | 340.29   | 338.63   | 26.39 o   |
| -15 | 7 | 1 | 68.29    | 52.77    | 17.59 o   |
| -14 | 7 | 1 | 2023.49  | 2269.29  | 85.76 o   |
| -13 | 7 | 1 | 105.37   | 138.53   | 19.79 o   |
| -12 | 7 | 1 | 5943.04  | 6533.00  | 233.09 o  |
| -11 | 7 | 1 | 2498.77  | 2792.63  | 96.75 o   |
| -10 | 7 | 1 | 4.21     | 10.99    | 96.75 <   |
| -9  | 7 | 1 | 75.94    | 96.75    | 13.19 o   |
| -8  | 7 | 1 | 1839.88  | 2049.40  | 74.76 o   |
| -7  | 7 | 1 | 2225.80  | 2152.75  | 76.96 o   |
| -6  | 7 | 1 | 1136.72  | 1070.88  | 61.57 o   |
| -5  | 7 | 1 | 1260.94  | 1042.29  | 43.98 o   |
| -4  | 7 | 1 | 4560.94  | 4995.95  | 193.51 o  |
| -3  | 7 | 1 | 1828.80  | 1772.33  | 74.76 o   |
| -2  | 7 | 1 | 1486.34  | 1341.34  | 52.77 o   |
| -1  | 7 | 1 | 326.36   | 239.68   | 19.79 o   |
| 0   | 7 | 1 | 15971.10 | 17002.10 | 540.93 o  |
| 1   | 7 | 1 | 106.09   | 112.14   | 15.39 o   |
| 2   | 7 | 1 | 5193.78  | 5352.18  | 224.29 o  |
| 3   | 7 | 1 | 4.35     | -4.40    | 10.99 <   |
| 4   | 7 | 1 | 975.35   | 1042.29  | 48.38 o   |
| 5   | 7 | 1 | 1553.28  | 1325.95  | 61.57 o   |
| 6   | 7 | 1 | 1158.74  | 1020.30  | 41.78 o   |
| 7   | 7 | 1 | 3207.39  | 3595.24  | 123.14 o  |
| 8   | 7 | 1 | 16296.80 | 17079.00 | 545.33 o  |
| 9   | 7 | 1 | 177.45   | 158.32   | 15.39 o   |
| 10  | 7 | 1 | 445.33   | 387.01   | 24.19 o   |
| 11  | 7 | 1 | 819.25   | 752.03   | 35.18 o   |
| 12  | 7 | 1 | 3065.04  | 3131.27  | 136.33 o  |
| 13  | 7 | 1 | 270.20   | 347.43   | 28.59 o   |
| 14  | 7 | 1 | 2206.44  | 2291.28  | 83.56 o   |
| 15  | 7 | 1 | 52.96    | 63.77    | 17.59 o   |
| 16  | 7 | 1 | 23.65    | 32.98    | 15.39 <   |
| 17  | 7 | 1 | 698.96   | 780.62   | 39.58 o   |
| 18  | 7 | 1 | 9.61     | 26.39    | 24.19 <   |
| 19  | 7 | 1 | 1510.53  | 1497.47  | 72.56 o   |
| -19 | 8 | 1 | 391.43   | 288.06   | 28.59 o   |
| -18 | 8 | 1 | 38.61    | 61.57    | 15.39 o   |

## regerite.cif

|     |   |   |          |          |           |
|-----|---|---|----------|----------|-----------|
| -17 | 8 | 1 | 6746.44  | 7403.78  | 248.48 o  |
| -16 | 8 | 1 | 14.89    | 43.98    | 21.99 <   |
| -15 | 8 | 1 | 3802.53  | 4364.86  | 151.73 o  |
| -14 | 8 | 1 | 749.83   | 894.96   | 43.98 o   |
| -13 | 8 | 1 | 1398.91  | 1537.05  | 61.57 o   |
| -12 | 8 | 1 | 2450.91  | 2972.94  | 105.55 o  |
| -11 | 8 | 1 | 11581.00 | 13347.50 | 611.30 o  |
| -10 | 8 | 1 | 3707.77  | 4254.92  | 145.13 o  |
| -9  | 8 | 1 | 2791.32  | 2931.17  | 103.35 o  |
| -8  | 8 | 1 | 2101.04  | 2038.40  | 74.76 o   |
| -7  | 8 | 1 | 38106.30 | 38102.90 | 1286.37 o |
| -6  | 8 | 1 | 764.83   | 769.62   | 35.18 o   |
| -5  | 8 | 1 | 7113.53  | 7320.22  | 277.06 o  |
| -4  | 8 | 1 | 1460.50  | 1451.29  | 57.17 o   |
| -3  | 8 | 1 | 24475.00 | 21375.70 | 681.67 o  |
| -2  | 8 | 1 | 376.36   | 197.90   | 19.79 o   |
| -1  | 8 | 1 | 10755.00 | 10906.70 | 354.03 o  |
| 0   | 8 | 1 | 1876.10  | 1303.96  | 52.77 o   |
| 1   | 8 | 1 | 6843.08  | 5734.79  | 217.69 o  |
| 2   | 8 | 1 | 192.41   | 175.91   | 17.59 o   |
| 3   | 8 | 1 | 3863.70  | 3571.05  | 173.71 o  |
| 4   | 8 | 1 | 2668.30  | 2445.20  | 98.95 o   |
| 5   | 8 | 1 | 5179.10  | 5952.49  | 195.70 o  |
| 6   | 8 | 1 | 53.35    | 125.34   | 15.39 o   |
| 7   | 8 | 1 | 211.93   | 272.67   | 19.79 o   |
| 8   | 8 | 1 | 7486.64  | 7647.86  | 250.68 o  |
| 9   | 8 | 1 | 27391.60 | 28278.20 | 899.36 o  |
| 10  | 8 | 1 | 68.17    | 57.17    | 13.19 o   |
| 11  | 8 | 1 | 12397.60 | 13653.10 | 510.15 o  |
| 12  | 8 | 1 | 137.06   | 182.51   | 21.99 o   |
| 13  | 8 | 1 | 122.05   | 96.75    | 17.59 o   |
| 14  | 8 | 1 | 29.28    | 26.39    | 15.39 <   |
| 15  | 8 | 1 | 138.80   | 162.72   | 19.79 o   |
| 16  | 8 | 1 | 815.67   | 850.98   | 43.98 o   |
| 17  | 8 | 1 | 8743.29  | 9844.58  | 376.02 o  |
| 18  | 8 | 1 | 869.55   | 956.53   | 46.18 o   |
| 19  | 8 | 1 | 7564.65  | 6321.91  | 404.60 o  |
| -19 | 9 | 1 | 437.21   | 316.64   | 46.18 o   |
| -18 | 9 | 1 | 67.83    | 52.77    | 15.39 o   |
| -17 | 9 | 1 | 3445.00  | 4026.23  | 301.25 o  |
| -16 | 9 | 1 | 1721.22  | 2001.02  | 79.16 o   |
| -15 | 9 | 1 | 3883.66  | 4725.49  | 160.52 o  |
| -14 | 9 | 1 | 617.49   | 598.11   | 32.98 o   |
| -13 | 9 | 1 | 6652.21  | 8043.66  | 281.46 o  |
| -12 | 9 | 1 | 7447.36  | 8217.38  | 441.98 o  |
| -11 | 9 | 1 | 3595.82  | 4444.02  | 151.73 o  |
| -10 | 9 | 1 | 6886.66  | 7487.33  | 244.08 o  |
| -9  | 9 | 1 | 1785.73  | 1882.28  | 72.56 o   |
| -8  | 9 | 1 | 15526.70 | 15656.30 | 501.36 o  |
| -7  | 9 | 1 | 134.66   | 83.56    | 15.39 o   |
| -6  | 9 | 1 | 74729.60 | 71137.40 | 2240.70 o |
| -5  | 9 | 1 | 3603.04  | 2970.75  | 103.35 o  |
| -4  | 9 | 1 | 227.44   | 406.80   | 28.59 o   |
| -3  | 9 | 1 | 2652.05  | 2515.57  | 105.55 o  |

## regerite.cif

|     |    |   |          |          |         |   |
|-----|----|---|----------|----------|---------|---|
| -2  | 9  | 1 | 81418.20 | 78257.50 | 2849.81 | o |
| -1  | 9  | 1 | 576.26   | 419.99   | 24.19   | o |
| 0   | 9  | 1 | 4744.84  | 3461.11  | 120.94  | o |
| 1   | 9  | 1 | 1334.01  | 956.53   | 41.78   | o |
| 2   | 9  | 1 | 15891.80 | 13413.40 | 547.53  | o |
| 3   | 9  | 1 | 684.80   | 545.33   | 32.98   | o |
| 4   | 9  | 1 | 2531.80  | 2282.48  | 94.55   | o |
| 5   | 9  | 1 | 2296.15  | 2284.68  | 96.75   | o |
| 6   | 9  | 1 | 1284.27  | 1319.35  | 52.77   | o |
| 7   | 9  | 1 | 2.34     | 26.39    | 13.19   | < |
| 8   | 9  | 1 | 37459.50 | 40686.70 | 1284.17 | o |
| 9   | 9  | 1 | 390.01   | 430.99   | 26.39   | o |
| 10  | 9  | 1 | 1325.92  | 1479.88  | 72.56   | o |
| 11  | 9  | 1 | 984.06   | 1066.48  | 52.77   | o |
| 12  | 9  | 1 | 421.60   | 351.83   | 24.19   | o |
| 13  | 9  | 1 | 4170.95  | 4663.92  | 171.52  | o |
| 14  | 9  | 1 | 57.76    | 114.34   | 17.59   | o |
| 15  | 9  | 1 | 92.48    | 98.95    | 19.79   | o |
| 16  | 9  | 1 | 1415.20  | 1499.67  | 72.56   | o |
| 17  | 9  | 1 | 250.91   | 250.68   | 24.19   | o |
| 18  | 9  | 1 | 58.95    | 72.56    | 17.59   | o |
| 19  | 9  | 1 | 661.89   | 582.72   | 57.17   | o |
| -18 | 10 | 1 | 4.16     | 6.60     | 17.59   | < |
| -17 | 10 | 1 | 1490.88  | 1420.50  | 61.57   | o |
| -16 | 10 | 1 | 2593.00  | 3140.06  | 131.93  | o |
| -15 | 10 | 1 | 471.53   | 609.10   | 46.18   | o |
| -14 | 10 | 1 | 126.31   | 171.52   | 19.79   | o |
| -13 | 10 | 1 | 4467.83  | 5338.99  | 180.31  | o |
| -12 | 10 | 1 | 1509.12  | 1723.96  | 68.17   | o |
| -11 | 10 | 1 | 28761.10 | 32242.80 | 1185.22 | o |
| -10 | 10 | 1 | 869.40   | 857.58   | 59.37   | o |
| -9  | 10 | 1 | 32654.10 | 35978.80 | 1139.04 | o |
| -8  | 10 | 1 | 3598.89  | 3821.73  | 151.73  | o |
| -7  | 10 | 1 | 7068.45  | 7438.96  | 244.08  | o |
| -6  | 10 | 1 | 3581.20  | 3342.36  | 118.74  | o |
| -5  | 10 | 1 | 16913.50 | 16553.50 | 532.14  | o |
| -4  | 10 | 1 | 372.33   | 371.62   | 24.19   | o |
| -3  | 10 | 1 | 25487.00 | 24102.40 | 765.22  | o |
| -2  | 10 | 1 | 1307.24  | 1259.98  | 59.37   | o |
| -1  | 10 | 1 | 36175.90 | 32401.10 | 1191.82 | o |
| 0   | 10 | 1 | 47.85    | 35.18    | 15.39   | < |
| 1   | 10 | 1 | 29606.40 | 27304.00 | 998.31  | o |
| 2   | 10 | 1 | 258.28   | 233.09   | 21.99   | o |
| 3   | 10 | 1 | 52789.30 | 50652.20 | 1844.90 | o |
| 4   | 10 | 1 | 976.15   | 861.98   | 46.18   | o |
| 5   | 10 | 1 | 439.58   | 305.65   | 21.99   | o |
| 6   | 10 | 1 | 12.29    | 41.78    | 15.39   | < |
| 7   | 10 | 1 | 543.50   | 384.81   | 35.18   | o |
| 8   | 10 | 1 | 242.50   | 226.49   | 21.99   | o |
| 9   | 10 | 1 | 57.32    | 30.78    | 15.39   | < |
| 10  | 10 | 1 | 337.45   | 354.03   | 28.59   | o |
| 11  | 10 | 1 | 7752.87  | 9002.39  | 312.25  | o |
| 12  | 10 | 1 | 49.29    | 43.98    | 15.39   | < |
| 13  | 10 | 1 | 4471.20  | 5105.90  | 173.71  | o |

## regerite.cif

|     |    |   |          |          |         |   |
|-----|----|---|----------|----------|---------|---|
| 14  | 10 | 1 | 473.18   | 536.54   | 32.98   | o |
| 15  | 10 | 1 | 3629.77  | 4276.91  | 160.52  | o |
| 16  | 10 | 1 | 23.57    | 8.80     | 19.79   | < |
| 17  | 10 | 1 | 2589.22  | 2691.48  | 101.15  | o |
| 18  | 10 | 1 | 14.71    | 28.59    | 17.59   | < |
| -18 | 11 | 1 | 4.47     | 6.60     | 21.99   | < |
| -17 | 11 | 1 | 6069.61  | 7230.06  | 261.67  | o |
| -16 | 11 | 1 | 2969.65  | 3368.75  | 120.94  | o |
| -15 | 11 | 1 | 223.43   | 246.28   | 24.19   | o |
| -14 | 11 | 1 | 13061.30 | 16250.00 | 525.54  | o |
| -13 | 11 | 1 | 34.93    | 21.99    | 17.59   | < |
| -12 | 11 | 1 | 317.13   | 415.60   | 28.59   | o |
| -11 | 11 | 1 | 2761.82  | 2900.38  | 105.55  | o |
| -10 | 11 | 1 | 1971.63  | 1886.68  | 74.76   | o |
| -9  | 11 | 1 | 349.71   | 327.64   | 35.18   | o |
| -8  | 11 | 1 | 1243.96  | 1528.25  | 63.77   | o |
| -7  | 11 | 1 | 334.79   | 358.42   | 26.39   | o |
| -6  | 11 | 1 | 35996.70 | 35176.20 | 1112.66 | o |
| -5  | 11 | 1 | 10296.50 | 9626.89  | 314.45  | o |
| -4  | 11 | 1 | 5167.75  | 5099.30  | 173.71  | o |
| -3  | 11 | 1 | 257.80   | 244.08   | 19.79   | o |
| -2  | 11 | 1 | 10471.30 | 10535.00 | 343.03  | o |
| -1  | 11 | 1 | 118.41   | 145.13   | 17.59   | o |
| 0   | 11 | 1 | 9115.29  | 9222.29  | 301.25  | o |
| 1   | 11 | 1 | 189.30   | 98.95    | 15.39   | o |
| 2   | 11 | 1 | 135.40   | 105.55   | 15.39   | o |
| 3   | 11 | 1 | 1.11     | -2.20    | 10.99   | < |
| 4   | 11 | 1 | 39.44    | 13.19    | 10.99   | < |
| 5   | 11 | 1 | 692.53   | 558.53   | 30.78   | o |
| 6   | 11 | 1 | 779.40   | 903.76   | 48.38   | o |
| 7   | 11 | 1 | 68.84    | 48.38    | 15.39   | o |
| 8   | 11 | 1 | 1816.52  | 1869.09  | 92.35   | o |
| 9   | 11 | 1 | 1013.42  | 1015.90  | 191.31  | o |
| 10  | 11 | 1 | 2481.17  | 2583.74  | 109.95  | o |
| 11  | 11 | 1 | 381.83   | 358.42   | 32.98   | o |
| 12  | 11 | 1 | 855.62   | 886.17   | 43.98   | o |
| 13  | 11 | 1 | 82.34    | 112.14   | 17.59   | o |
| 14  | 11 | 1 | 4.60     | 2.20     | 17.59   | < |
| 15  | 11 | 1 | 4611.90  | 5930.50  | 270.47  | o |
| 16  | 11 | 1 | 216.96   | 239.68   | 24.19   | o |
| 17  | 11 | 1 | 61.93    | 76.96    | 19.79   | o |
| 18  | 11 | 1 | 113.11   | 147.33   | 30.78   | o |
| -17 | 12 | 1 | 3314.34  | 3674.40  | 134.13  | o |
| -16 | 12 | 1 | 828.19   | 883.97   | 46.18   | o |
| -15 | 12 | 1 | 356.72   | 362.82   | 28.59   | o |
| -14 | 12 | 1 | 2232.10  | 2640.91  | 142.93  | o |
| -13 | 12 | 1 | 410.36   | 452.98   | 30.78   | o |
| -12 | 12 | 1 | 304.25   | 303.45   | 39.58   | o |
| -11 | 12 | 1 | 35.45    | 52.77    | 15.39   | o |
| -10 | 12 | 1 | 2971.31  | 3173.05  | 112.14  | o |
| -9  | 12 | 1 | 3227.73  | 3243.41  | 116.54  | o |
| -8  | 12 | 1 | 4.41     | 26.39    | 19.79   | < |
| -7  | 12 | 1 | 158.80   | 186.91   | 19.79   | o |
| -6  | 12 | 1 | 420.34   | 426.59   | 54.97   | o |

## regerite.cif

|     |    |   |          |          |         |   |
|-----|----|---|----------|----------|---------|---|
| -5  | 12 | 1 | 39602.30 | 38698.90 | 1224.80 | o |
| -4  | 12 | 1 | 0.89     | 26.39    | 39.58   | < |
| -3  | 12 | 1 | 999.95   | 1077.47  | 48.38   | o |
| -2  | 12 | 1 | 5.16     | 6.60     | 10.99   | < |
| -1  | 12 | 1 | 11445.40 | 10458.10 | 338.63  | o |
| 0   | 12 | 1 | 754.26   | 686.06   | 37.38   | o |
| 1   | 12 | 1 | 18487.60 | 18427.00 | 589.31  | o |
| 2   | 12 | 1 | 82.18    | 50.58    | 13.19   | o |
| 3   | 12 | 1 | 803.73   | 866.38   | 39.58   | o |
| 4   | 12 | 1 | 552.57   | 457.38   | 28.59   | o |
| 5   | 12 | 1 | 1822.68  | 1475.48  | 59.37   | o |
| 6   | 12 | 1 | 1061.18  | 1152.24  | 50.58   | o |
| 7   | 12 | 1 | 203.75   | 195.70   | 21.99   | o |
| 8   | 12 | 1 | 39.86    | 46.18    | 19.79   | < |
| 9   | 12 | 1 | 10779.40 | 11753.20 | 620.10  | o |
| 10  | 12 | 1 | 1244.59  | 1266.58  | 68.17   | o |
| 11  | 12 | 1 | 1921.26  | 2001.02  | 79.16   | o |
| 12  | 12 | 1 | 1784.44  | 1723.96  | 70.37   | o |
| 13  | 12 | 1 | 372.47   | 378.21   | 28.59   | o |
| 14  | 12 | 1 | 361.10   | 329.84   | 26.39   | o |
| 15  | 12 | 1 | 1685.06  | 1651.39  | 92.35   | o |
| 16  | 12 | 1 | 56.57    | 87.96    | 19.79   | o |
| 17  | 12 | 1 | 978.02   | 886.17   | 54.97   | o |
| -17 | 13 | 1 | 68.14    | 52.77    | 24.19   | < |
| -16 | 13 | 1 | 3.67     | 4.40     | 17.59   | < |
| -15 | 13 | 1 | 396.88   | 455.18   | 30.78   | o |
| -14 | 13 | 1 | 2817.40  | 3300.58  | 169.32  | o |
| -13 | 13 | 1 | 67.28    | 68.17    | 19.79   | o |
| -12 | 13 | 1 | 1318.55  | 1453.49  | 61.57   | o |
| -11 | 13 | 1 | 49.99    | 70.37    | 17.59   | o |
| -10 | 13 | 1 | 9533.09  | 10242.60 | 332.04  | o |
| -9  | 13 | 1 | 245.71   | 182.51   | 19.79   | o |
| -8  | 13 | 1 | 9047.56  | 9530.13  | 310.05  | o |
| -7  | 13 | 1 | 26.89    | 65.97    | 21.99   | < |
| -6  | 13 | 1 | 1240.66  | 1218.20  | 54.97   | o |
| -5  | 13 | 1 | 59.00    | 68.17    | 222.09  | < |
| -4  | 13 | 1 | 45140.40 | 43864.10 | 1391.92 | o |
| -3  | 13 | 1 | 847.79   | 807.01   | 39.58   | o |
| -2  | 13 | 1 | 141.03   | 134.13   | 17.59   | o |
| -1  | 13 | 1 | 2183.45  | 2040.60  | 79.16   | o |
| 0   | 13 | 1 | 12456.60 | 12604.20 | 411.20  | o |
| 1   | 13 | 1 | 596.50   | 514.55   | 30.78   | o |
| 2   | 13 | 1 | 328.10   | 479.36   | 28.59   | o |
| 3   | 13 | 1 | 173.44   | 158.32   | 19.79   | o |
| 4   | 13 | 1 | 14023.90 | 13633.30 | 437.59  | o |
| 5   | 13 | 1 | 262.76   | 272.67   | 24.19   | o |
| 6   | 13 | 1 | 9815.33  | 10444.90 | 391.41  | o |
| 7   | 13 | 1 | 553.63   | 534.34   | 32.98   | o |
| 8   | 13 | 1 | 1499.15  | 1438.10  | 72.56   | o |
| 9   | 13 | 1 | 255.81   | 248.48   | 26.39   | o |
| 10  | 13 | 1 | 5668.30  | 6005.26  | 233.09  | o |
| 11  | 13 | 1 | 724.92   | 765.22   | 46.18   | o |
| 12  | 13 | 1 | 1201.43  | 1191.82  | 65.97   | o |
| 13  | 13 | 1 | 7.52     | 28.59    | 17.59   | < |



## regerite.cif

|     |    |   |          |          |          |
|-----|----|---|----------|----------|----------|
| 14  | 13 | 1 | 890.33   | 807.01   | 43.98 o  |
| 15  | 13 | 1 | 754.66   | 760.83   | 41.78 o  |
| 16  | 13 | 1 | 157.65   | 202.30   | 24.19 o  |
| 17  | 13 | 1 | 51.54    | 19.79    | 39.58 <  |
| -16 | 14 | 1 | 4.05     | 13.19    | 19.79 <  |
| -15 | 14 | 1 | 4166.48  | 4657.32  | 164.92 o |
| -14 | 14 | 1 | 281.22   | 299.05   | 26.39 o  |
| -13 | 14 | 1 | 2579.82  | 2623.32  | 101.15 o |
| -12 | 14 | 1 | 114.23   | 94.55    | 19.79 o  |
| -11 | 14 | 1 | 6815.19  | 7056.35  | 235.29 o |
| -10 | 14 | 1 | 2199.12  | 2300.07  | 92.35 o  |
| -9  | 14 | 1 | 357.55   | 402.40   | 28.59 o  |
| -8  | 14 | 1 | 4.84     | 10.99    | 17.59 <  |
| -7  | 14 | 1 | 1030.85  | 965.33   | 54.97 o  |
| -6  | 14 | 1 | 1005.25  | 914.75   | 43.98 o  |
| -5  | 14 | 1 | 8289.03  | 8054.66  | 307.85 o |
| -4  | 14 | 1 | 425.04   | 450.78   | 28.59 o  |
| -3  | 14 | 1 | 25364.70 | 24199.20 | 767.42 o |
| -2  | 14 | 1 | 62.81    | 61.57    | 17.59 o  |
| -1  | 14 | 1 | 9588.83  | 9690.66  | 318.84 o |
| 0   | 14 | 1 | 1927.14  | 1822.91  | 76.96 o  |
| 1   | 14 | 1 | 19047.80 | 19080.10 | 615.70 o |
| 2   | 14 | 1 | 647.24   | 589.31   | 35.18 o  |
| 3   | 14 | 1 | 116.31   | 112.14   | 17.59 o  |
| 4   | 14 | 1 | 676.65   | 576.12   | 39.58 o  |
| 5   | 14 | 1 | 2194.39  | 2462.79  | 92.35 o  |
| 6   | 14 | 1 | 143.71   | 120.94   | 19.79 o  |
| 7   | 14 | 1 | 11428.50 | 11847.80 | 384.81 o |
| 8   | 14 | 1 | 829.98   | 743.24   | 46.18 o  |
| 9   | 14 | 1 | 540.92   | 534.34   | 32.98 o  |
| 10  | 14 | 1 | 22.76    | 28.59    | 15.39 <  |
| 11  | 14 | 1 | 189.56   | 261.67   | 28.59 o  |
| 12  | 14 | 1 | 2068.62  | 2322.06  | 114.34 o |
| 13  | 14 | 1 | 109.79   | 118.74   | 28.59 o  |
| 14  | 14 | 1 | 381.37   | 318.84   | 28.59 o  |
| 15  | 14 | 1 | 3417.89  | 3329.17  | 123.14 o |
| 16  | 14 | 1 | 349.27   | 215.49   | 360.62 < |
| -15 | 15 | 1 | 5373.35  | 5851.34  | 204.50 o |
| -14 | 15 | 1 | 1908.76  | 1957.04  | 81.36 o  |
| -13 | 15 | 1 | 3118.37  | 3104.88  | 116.54 o |
| -12 | 15 | 1 | 398.21   | 409.00   | 50.58 o  |
| -11 | 15 | 1 | 31.46    | 39.58    | 15.39 <  |
| -10 | 15 | 1 | 10908.20 | 11621.30 | 380.41 o |
| -9  | 15 | 1 | 1148.63  | 1119.25  | 52.77 o  |
| -8  | 15 | 1 | 2212.06  | 2256.10  | 85.76 o  |
| -7  | 15 | 1 | 32.42    | 65.97    | 17.59 o  |
| -6  | 15 | 1 | 249.58   | 211.10   | 24.19 o  |
| -5  | 15 | 1 | 2691.91  | 2766.25  | 120.94 o |
| -4  | 15 | 1 | 3554.17  | 3403.93  | 123.14 o |
| -3  | 15 | 1 | 293.00   | 307.85   | 30.78 o  |
| -2  | 15 | 1 | 4405.44  | 4597.95  | 158.32 o |
| -1  | 15 | 1 | 60.17    | 76.96    | 19.79 o  |
| 0   | 15 | 1 | 5052.13  | 5081.71  | 204.50 o |
| 1   | 15 | 1 | 99.57    | 105.55   | 24.19 o  |

## regerite.cif

|     |    |   |          |          |          |
|-----|----|---|----------|----------|----------|
| 2   | 15 | 1 | 11864.80 | 11876.40 | 389.21 o |
| 3   | 15 | 1 | 111.72   | 147.33   | 19.79 o  |
| 4   | 15 | 1 | 6179.55  | 5805.16  | 228.69 o |
| 5   | 15 | 1 | 473.61   | 409.00   | 32.98 o  |
| 6   | 15 | 1 | 6416.28  | 6412.06  | 215.49 o |
| 7   | 15 | 1 | 991.59   | 1070.88  | 57.17 o  |
| 8   | 15 | 1 | 8166.08  | 8936.43  | 290.26 o |
| 9   | 15 | 1 | 377.40   | 349.63   | 28.59 o  |
| 10  | 15 | 1 | 9019.91  | 9556.52  | 316.64 o |
| 11  | 15 | 1 | 833.59   | 899.36   | 54.97 o  |
| 12  | 15 | 1 | 7998.15  | 8808.89  | 409.00 o |
| 13  | 15 | 1 | 215.81   | 228.69   | 32.98 o  |
| 14  | 15 | 1 | 3861.05  | 3575.45  | 131.93 o |
| 15  | 15 | 1 | 1490.37  | 1510.66  | 103.35 o |
| 16  | 15 | 1 | 6079.27  | 6214.16  | 424.39 o |
| -15 | 16 | 1 | 1353.09  | 883.97   | 68.17 o  |
| -14 | 16 | 1 | 613.44   | 602.51   | 37.38 o  |
| -13 | 16 | 1 | 8600.43  | 8888.05  | 292.46 o |
| -12 | 16 | 1 | 6.95     | -4.40    | 15.39 <  |
| -11 | 16 | 1 | 1471.24  | 1488.67  | 63.77 o  |
| -10 | 16 | 1 | 6471.33  | 7258.65  | 246.28 o |
| -9  | 16 | 1 | 2507.91  | 2647.50  | 101.15 o |
| -8  | 16 | 1 | 1983.78  | 2207.72  | 85.76 o  |
| -7  | 16 | 1 | 2145.36  | 1998.82  | 79.16 o  |
| -6  | 16 | 1 | 48.49    | 50.58    | 17.59 <  |
| -5  | 16 | 1 | 3600.37  | 3843.72  | 138.53 o |
| -4  | 16 | 1 | 428.20   | 417.80   | 32.98 o  |
| -3  | 16 | 1 | 3201.96  | 3258.80  | 116.54 o |
| -2  | 16 | 1 | 40.07    | 30.78    | 19.79 <  |
| -1  | 16 | 1 | 2105.82  | 2313.27  | 103.35 o |
| 0   | 16 | 1 | 749.08   | 776.22   | 48.38 o  |
| 1   | 16 | 1 | 11580.00 | 12105.10 | 459.58 o |
| 2   | 16 | 1 | 1135.22  | 1090.67  | 61.57 o  |
| 3   | 16 | 1 | 1305.53  | 1147.84  | 52.77 o  |
| 4   | 16 | 1 | 27.59    | 46.18    | 17.59 <  |
| 5   | 16 | 1 | 3483.64  | 3709.58  | 151.73 o |
| 6   | 16 | 1 | 553.86   | 536.54   | 32.98 o  |
| 7   | 16 | 1 | 1739.96  | 1754.74  | 72.56 o  |
| 8   | 16 | 1 | 88.36    | 65.97    | 15.39 o  |
| 9   | 16 | 1 | 2037.69  | 2095.57  | 81.36 o  |
| 10  | 16 | 1 | 5296.99  | 5893.12  | 217.69 o |
| 11  | 16 | 1 | 77.16    | 94.55    | 21.99 o  |
| 12  | 16 | 1 | 550.11   | 538.74   | 41.78 o  |
| 13  | 16 | 1 | 194.80   | 180.31   | 43.98 o  |
| 14  | 16 | 1 | 210.72   | 261.67   | 35.18 o  |
| 15  | 16 | 1 | 1013.82  | 971.92   | 92.35 o  |
| -14 | 17 | 1 | 6.44     | 17.59    | 17.59 <  |
| -13 | 17 | 1 | 3180.89  | 3302.78  | 136.33 o |
| -12 | 17 | 1 | 774.34   | 664.08   | 39.58 o  |
| -11 | 17 | 1 | 74.95    | 87.96    | 120.94 < |
| -10 | 17 | 1 | 5121.33  | 5378.57  | 184.71 o |
| -9  | 17 | 1 | 360.86   | 380.41   | 30.78 o  |
| -8  | 17 | 1 | 2332.29  | 2242.90  | 87.96 o  |
| -7  | 17 | 1 | 210.85   | 224.29   | 24.19 o  |

## regerite.cif

|     |    |   |          |          |        |   |
|-----|----|---|----------|----------|--------|---|
| -6  | 17 | 1 | 2697.98  | 2847.61  | 105.55 | o |
| -5  | 17 | 1 | 286.11   | 307.85   | 26.39  | o |
| -4  | 17 | 1 | 25568.00 | 27352.40 | 870.77 | o |
| -3  | 17 | 1 | 50.70    | 70.37    | 17.59  | o |
| -2  | 17 | 1 | 5187.85  | 5543.49  | 189.11 | o |
| -1  | 17 | 1 | 122.10   | 109.95   | 19.79  | o |
| 0   | 17 | 1 | 1327.31  | 1411.71  | 63.77  | o |
| 1   | 17 | 1 | 161.12   | 158.32   | 21.99  | o |
| 2   | 17 | 1 | 2108.76  | 2146.15  | 85.76  | o |
| 3   | 17 | 1 | 861.29   | 828.99   | 43.98  | o |
| 4   | 17 | 1 | 14181.90 | 15322.10 | 492.56 | o |
| 5   | 17 | 1 | 19.64    | 15.39    | 281.46 | < |
| 6   | 17 | 1 | 17040.50 | 18136.70 | 580.52 | o |
| 7   | 17 | 1 | 803.99   | 771.82   | 41.78  | o |
| 8   | 17 | 1 | 289.84   | 237.48   | 24.19  | o |
| 9   | 17 | 1 | 249.28   | 301.25   | 24.19  | o |
| 10  | 17 | 1 | 2584.78  | 2878.39  | 120.94 | o |
| 11  | 17 | 1 | 300.42   | 246.28   | 28.59  | o |
| 12  | 17 | 1 | 3621.12  | 3676.60  | 149.53 | o |
| 13  | 17 | 1 | 1303.21  | 1233.60  | 70.37  | o |
| 14  | 17 | 1 | 6453.08  | 6051.44  | 307.85 | o |
| -13 | 18 | 1 | 4184.66  | 3727.18  | 202.30 | o |
| -12 | 18 | 1 | 573.16   | 523.34   | 35.18  | o |
| -11 | 18 | 1 | 2051.97  | 2047.20  | 81.36  | o |
| -10 | 18 | 1 | 101.32   | 74.76    | 17.59  | o |
| -9  | 18 | 1 | 4287.97  | 4564.97  | 224.29 | o |
| -8  | 18 | 1 | 798.76   | 857.58   | 61.57  | o |
| -7  | 18 | 1 | 765.22   | 807.01   | 43.98  | o |
| -6  | 18 | 1 | 115.70   | 92.35    | 17.59  | o |
| -5  | 18 | 1 | 4486.77  | 4828.84  | 167.12 | o |
| -4  | 18 | 1 | 51.58    | 57.17    | 15.39  | o |
| -3  | 18 | 1 | 19.33    | 30.78    | 15.39  | < |
| -2  | 18 | 1 | 131.50   | 112.14   | 19.79  | o |
| -1  | 18 | 1 | 2572.47  | 2759.65  | 105.55 | o |
| 0   | 18 | 1 | 797.74   | 919.15   | 46.18  | o |
| 1   | 18 | 1 | 796.15   | 796.01   | 103.35 | o |
| 2   | 18 | 1 | 408.49   | 340.83   | 28.59  | o |
| 3   | 18 | 1 | 15990.70 | 16452.30 | 529.94 | o |
| 4   | 18 | 1 | 8.49     | 8.80     | 15.39  | < |
| 5   | 18 | 1 | 154.89   | 178.11   | 21.99  | o |
| 6   | 18 | 1 | 170.23   | 195.70   | 21.99  | o |
| 7   | 18 | 1 | 5927.90  | 5950.29  | 206.70 | o |
| 8   | 18 | 1 | 1765.25  | 1939.45  | 90.16  | o |
| 9   | 18 | 1 | 60.18    | 39.58    | 15.39  | < |
| 10  | 18 | 1 | 207.75   | 204.50   | 26.39  | o |
| 11  | 18 | 1 | 4752.87  | 4400.05  | 156.12 | o |
| 12  | 18 | 1 | 731.13   | 664.08   | 46.18  | o |
| 13  | 18 | 1 | 5213.71  | 5301.60  | 268.27 | o |
| -12 | 19 | 1 | 1488.19  | 1297.36  | 83.56  | o |
| -11 | 19 | 1 | 200.49   | 136.33   | 19.79  | o |
| -10 | 19 | 1 | 60.84    | 54.97    | 17.59  | o |
| -9  | 19 | 1 | 392.21   | 430.99   | 30.78  | o |
| -8  | 19 | 1 | 6005.57  | 6528.60  | 224.29 | o |
| -7  | 19 | 1 | 124.77   | 83.56    | 19.79  | o |

## regerite.cif

|     |    |   |          |          |         |   |
|-----|----|---|----------|----------|---------|---|
| -6  | 19 | 1 | 16467.90 | 17463.90 | 657.48  | o |
| -5  | 19 | 1 | 374.01   | 417.80   | 35.18   | o |
| -4  | 19 | 1 | 1847.89  | 1877.88  | 76.96   | o |
| -3  | 19 | 1 | 576.66   | 558.53   | 151.73  | o |
| -2  | 19 | 1 | 4139.14  | 4334.08  | 162.72  | o |
| -1  | 19 | 1 | 1030.49  | 1051.09  | 52.77   | o |
| 0   | 19 | 1 | 267.92   | 241.88   | 24.19   | o |
| 1   | 19 | 1 | 31.61    | 24.19    | 255.07  | < |
| 2   | 19 | 1 | 30927.90 | 35101.40 | 1117.05 | o |
| 3   | 19 | 1 | 2.96     | 10.99    | 164.92  | < |
| 4   | 19 | 1 | 8672.90  | 9919.34  | 378.21  | o |
| 5   | 19 | 1 | 361.20   | 406.80   | 28.59   | o |
| 6   | 19 | 1 | 3348.15  | 3093.89  | 118.74  | o |
| 7   | 19 | 1 | 322.03   | 376.02   | 30.78   | o |
| 8   | 19 | 1 | 13842.00 | 16129.10 | 606.90  | o |
| 9   | 19 | 1 | 3.28     | -19.79   | 13.19   | < |
| 10  | 19 | 1 | 673.85   | 593.71   | 35.18   | o |
| 11  | 19 | 1 | 577.64   | 529.94   | 41.78   | o |
| 12  | 19 | 1 | 87.80    | 171.52   | 41.78   | o |
| -10 | 20 | 1 | 337.44   | 261.67   | 28.59   | o |
| -9  | 20 | 1 | 28.87    | 46.18    | 15.39   | < |
| -8  | 20 | 1 | 631.67   | 626.69   | 37.38   | o |
| -7  | 20 | 1 | 719.25   | 686.06   | 39.58   | o |
| -6  | 20 | 1 | 153.94   | 202.30   | 21.99   | o |
| -5  | 20 | 1 | 1982.61  | 1998.82  | 92.35   | o |
| -4  | 20 | 1 | 55.73    | 59.37    | 19.79   | o |
| -3  | 20 | 1 | 18654.40 | 21925.50 | 822.40  | o |
| -2  | 20 | 1 | 418.83   | 468.37   | 37.38   | o |
| -1  | 20 | 1 | 7544.15  | 8248.16  | 279.26  | o |
| 0   | 20 | 1 | 845.54   | 839.99   | 46.18   | o |
| 1   | 20 | 1 | 764.72   | 864.18   | 46.18   | o |
| 2   | 20 | 1 | 444.23   | 488.16   | 32.98   | o |
| 3   | 20 | 1 | 10558.20 | 12500.90 | 576.12  | o |
| 4   | 20 | 1 | 87.03    | 92.35    | 24.19   | o |
| 5   | 20 | 1 | 120.47   | 101.15   | 19.79   | o |
| 6   | 20 | 1 | 0.08     | 10.99    | 17.59   | < |
| 7   | 20 | 1 | 2214.78  | 2524.36  | 98.95   | o |
| 8   | 20 | 1 | 1209.77  | 1198.41  | 57.17   | o |
| 9   | 20 | 1 | 1136.95  | 1128.05  | 54.97   | o |
| 10  | 20 | 1 | 1.19     | 15.39    | 19.79   | < |
| 11  | 20 | 1 | 2712.97  | 2873.99  | 217.69  | o |
| -9  | 21 | 1 | 2.36     | 6.60     | 24.19   | < |
| -8  | 21 | 1 | 37.61    | 13.19    | 15.39   | < |
| -7  | 21 | 1 | 277.80   | 327.64   | 26.39   | o |
| -6  | 21 | 1 | 685.58   | 688.26   | 39.58   | o |
| -5  | 21 | 1 | 87.83    | 116.54   | 19.79   | o |
| -4  | 21 | 1 | 353.92   | 336.43   | 26.39   | o |
| -3  | 21 | 1 | 226.77   | 200.10   | 21.99   | o |
| -2  | 21 | 1 | 1017.33  | 927.95   | 52.77   | o |
| -1  | 21 | 1 | 162.07   | 195.70   | 26.39   | o |
| 0   | 21 | 1 | 334.27   | 292.46   | 30.78   | o |
| 1   | 21 | 1 | 0.83     | 8.80     | 17.59   | < |
| 2   | 21 | 1 | 1693.75  | 1858.09  | 87.96   | o |
| 3   | 21 | 1 | 18.03    | 10.99    | 15.39   | < |

## regerite.cif

|     |    |   |          |          |           |
|-----|----|---|----------|----------|-----------|
| 4   | 21 | 1 | 206.05   | 241.88   | 24.19 o   |
| 5   | 21 | 1 | 377.83   | 444.18   | 32.98 o   |
| 6   | 21 | 1 | 864.35   | 853.18   | 46.18 o   |
| 7   | 21 | 1 | 456.28   | 365.02   | 28.59 o   |
| 8   | 21 | 1 | 6068.70  | 6271.33  | 252.88 o  |
| 9   | 21 | 1 | 142.52   | 138.53   | 28.59 o   |
| 10  | 21 | 1 | 835.16   | 547.53   | 70.37 o   |
| -7  | 22 | 1 | 2809.07  | 2812.42  | 160.52 o  |
| -6  | 22 | 1 | 825.56   | 789.41   | 50.58 o   |
| -5  | 22 | 1 | 4.05     | 10.99    | 15.39 <   |
| -4  | 22 | 1 | 10.27    | 2.20     | 15.39 <   |
| -3  | 22 | 1 | 2673.87  | 2621.12  | 101.15 o  |
| -2  | 22 | 1 | 110.85   | 125.34   | 19.79 o   |
| -1  | 22 | 1 | 551.34   | 694.86   | 39.58 o   |
| 0   | 22 | 1 | 20.80    | 13.19    | 17.59 <   |
| 1   | 22 | 1 | 4303.67  | 4382.46  | 158.32 o  |
| 2   | 22 | 1 | 40.08    | 26.39    | 17.59 <   |
| 3   | 22 | 1 | 2564.96  | 2440.81  | 96.75 o   |
| 4   | 22 | 1 | 5.07     | 15.39    | 17.59 <   |
| 5   | 22 | 1 | 14.11    | 28.59    | 19.79 <   |
| 6   | 22 | 1 | 237.57   | 235.29   | 30.78 o   |
| 7   | 22 | 1 | 504.06   | 314.45   | 41.78 o   |
| 8   | 22 | 1 | 699.03   | 670.67   | 79.16 o   |
| -5  | 23 | 1 | 1.93     | -8.80    | 43.98 <   |
| -4  | 23 | 1 | 299.50   | 206.70   | 48.38 o   |
| -3  | 23 | 1 | 426.87   | 338.63   | 37.38 o   |
| -2  | 23 | 1 | 1699.18  | 1589.82  | 81.36 o   |
| -1  | 23 | 1 | 245.65   | 167.12   | 26.39 o   |
| 0   | 23 | 1 | 1698.95  | 1649.19  | 85.76 o   |
| 1   | 23 | 1 | 19.41    | 24.19    | 19.79 <   |
| 2   | 23 | 1 | 5548.11  | 5624.85  | 230.89 o  |
| 3   | 23 | 1 | 117.15   | 107.75   | 24.19 o   |
| 4   | 23 | 1 | 98.12    | 43.98    | 37.38 <   |
| 5   | 23 | 1 | 268.96   | 439.79   | 65.97 o   |
| -20 | 0  | 2 | 1724.75  | 1499.67  | 90.16 o   |
| -19 | 0  | 2 | 80.93    | 83.56    | 17.59 o   |
| -18 | 0  | 2 | 1765.20  | 1814.11  | 149.53 o  |
| -17 | 0  | 2 | 569.83   | 598.11   | 43.98 o   |
| -16 | 0  | 2 | 93.55    | 140.73   | 21.99 o   |
| -15 | 0  | 2 | 751.22   | 714.65   | 48.38 o   |
| -14 | 0  | 2 | 16906.70 | 17259.40 | 1112.66 o |
| -13 | 0  | 2 | 62.78    | 120.94   | 24.19 o   |
| -12 | 0  | 2 | 26923.60 | 28590.40 | 1279.77 o |
| -11 | 0  | 2 | 2156.96  | 2471.59  | 120.94 o  |
| -10 | 0  | 2 | 1463.46  | 1625.00  | 85.76 o   |
| -9  | 0  | 2 | 3783.76  | 3735.97  | 175.91 o  |
| -8  | 0  | 2 | 8843.22  | 6827.66  | 310.05 o  |
| -7  | 0  | 2 | 0.55     | 30.78    | 21.99 <   |
| -6  | 0  | 2 | 59608.10 | 58986.10 | 2625.52 o |
| -5  | 0  | 2 | 76.17    | -39.58   | 13.19 <   |
| -4  | 0  | 2 | 52743.60 | 54962.10 | 2814.62 o |
| -3  | 0  | 2 | 72.88    | -52.77   | 10.99 <   |
| -2  | 0  | 2 | 1379.63  | 1385.32  | 70.37 o   |
| -1  | 0  | 2 | 253.21   | 103.35   | 15.39 o   |

## regerite.cif

|     |   |   |          |          |         |   |
|-----|---|---|----------|----------|---------|---|
| 0   | 0 | 2 | 63484.50 | 56503.50 | 3546.86 | o |
| 1   | 0 | 2 | 1103.96  | 787.22   | 39.58   | o |
| 2   | 0 | 2 | 98968.90 | 88161.40 | 3900.89 | o |
| 3   | 0 | 2 | 2521.66  | 2335.26  | 112.14  | o |
| 4   | 0 | 2 | 28793.60 | 24843.40 | 1103.86 | o |
| 5   | 0 | 2 | 93.36    | 114.34   | 15.39   | o |
| 6   | 0 | 2 | 619.29   | 912.55   | 48.38   | o |
| 7   | 0 | 2 | 6642.96  | 5536.89  | 356.23  | o |
| 8   | 0 | 2 | 41547.80 | 42397.40 | 1888.88 | o |
| 9   | 0 | 2 | 459.06   | 457.38   | 32.98   | o |
| 10  | 0 | 2 | 60419.20 | 58196.70 | 2592.53 | o |
| 11  | 0 | 2 | 1109.39  | 1136.84  | 63.77   | o |
| 12  | 0 | 2 | 13941.50 | 14154.50 | 633.29  | o |
| 13  | 0 | 2 | 779.07   | 754.23   | 61.57   | o |
| 14  | 0 | 2 | 8649.87  | 9503.75  | 620.10  | o |
| 15  | 0 | 2 | 1977.96  | 2146.15  | 109.95  | o |
| 16  | 0 | 2 | 11216.10 | 11733.50 | 532.14  | o |
| 17  | 0 | 2 | 129.34   | 94.55    | 19.79   | o |
| 18  | 0 | 2 | 10830.60 | 12340.40 | 813.60  | o |
| 19  | 0 | 2 | 2072.32  | 2278.08  | 120.94  | o |
| 20  | 0 | 2 | 1780.99  | 1644.79  | 153.93  | o |
| -20 | 1 | 2 | 7.66     | 43.98    | 15.39   | < |
| -19 | 1 | 2 | 0.36     | 13.19    | 10.99   | < |
| -18 | 1 | 2 | 501.73   | 510.15   | 46.18   | o |
| -17 | 1 | 2 | 161.77   | 171.52   | 15.39   | o |
| -16 | 1 | 2 | 214.01   | 195.70   | 17.59   | o |
| -15 | 1 | 2 | 1088.99  | 1165.43  | 48.38   | o |
| -14 | 1 | 2 | 3113.49  | 3388.54  | 171.52  | o |
| -13 | 1 | 2 | 2668.16  | 2482.58  | 120.94  | o |
| -12 | 1 | 2 | 574.80   | 576.12   | 28.59   | o |
| -11 | 1 | 2 | 22961.50 | 23823.10 | 756.43  | o |
| -10 | 1 | 2 | 3688.40  | 4076.80  | 136.33  | o |
| -9  | 1 | 2 | 45932.00 | 42250.10 | 1332.55 | o |
| -8  | 1 | 2 | 2.91     | -13.19   | 10.99   | < |
| -7  | 1 | 2 | 24.83    | 35.18    | 13.19   | < |
| -6  | 1 | 2 | 1256.69  | 1295.17  | 46.18   | o |
| -5  | 1 | 2 | 9781.03  | 10673.60 | 340.83  | o |
| -4  | 1 | 2 | 1079.52  | 1040.09  | 37.38   | o |
| -3  | 1 | 2 | 77990.90 | 72848.10 | 2667.29 | o |
| -2  | 1 | 2 | 962.16   | 798.21   | 28.59   | o |
| -1  | 1 | 2 | 30505.70 | 29758.00 | 1079.67 | o |
| 0   | 1 | 2 | 979.16   | 835.59   | 41.78   | o |
| 1   | 1 | 2 | 64403.70 | 59263.20 | 2148.35 | o |
| 2   | 1 | 2 | 1714.71  | 1257.78  | 41.78   | o |
| 3   | 1 | 2 | 8755.20  | 9380.61  | 294.66  | o |
| 4   | 1 | 2 | 1477.57  | 1196.21  | 41.78   | o |
| 5   | 1 | 2 | 60953.30 | 50120.10 | 1574.43 | o |
| 6   | 1 | 2 | 61.92    | 81.36    | 10.99   | o |
| 7   | 1 | 2 | 20797.60 | 19741.90 | 883.97  | o |
| 8   | 1 | 2 | 1210.29  | 1233.60  | 46.18   | o |
| 9   | 1 | 2 | 3721.36  | 3674.40  | 123.14  | o |
| 10  | 1 | 2 | 2913.88  | 3071.90  | 103.35  | o |
| 11  | 1 | 2 | 6590.83  | 6165.78  | 200.10  | o |
| 12  | 1 | 2 | 3683.65  | 3991.05  | 131.93  | o |

## regerite.cif

|     |   |   |          |          |           |
|-----|---|---|----------|----------|-----------|
| 13  | 1 | 2 | 1755.69  | 1800.92  | 87.96 o   |
| 14  | 1 | 2 | 2963.12  | 3282.99  | 164.92 o  |
| 15  | 1 | 2 | 8076.59  | 8547.22  | 277.06 o  |
| 16  | 1 | 2 | 10035.80 | 11570.70 | 371.62 o  |
| 17  | 1 | 2 | 1091.73  | 1055.48  | 46.18 o   |
| 18  | 1 | 2 | 1213.69  | 1180.82  | 61.57 o   |
| 19  | 1 | 2 | 1359.45  | 1405.11  | 57.17 o   |
| 20  | 1 | 2 | 560.39   | 573.92   | 41.78 o   |
| -20 | 2 | 2 | 1559.71  | 1521.66  | 79.16 o   |
| -19 | 2 | 2 | 796.59   | 725.65   | 39.58 o   |
| -18 | 2 | 2 | 5401.47  | 5567.67  | 219.89 o  |
| -17 | 2 | 2 | 2296.31  | 2458.40  | 90.16 o   |
| -16 | 2 | 2 | 1.59     | 2.20     | 8.80 <    |
| -15 | 2 | 2 | 432.23   | 430.99   | 24.19 o   |
| -14 | 2 | 2 | 135.07   | 125.34   | 24.19 o   |
| -13 | 2 | 2 | 288.93   | 206.70   | 21.99 o   |
| -12 | 2 | 2 | 3009.07  | 3038.91  | 105.55 o  |
| -11 | 2 | 2 | 6235.95  | 5827.15  | 191.31 o  |
| -10 | 2 | 2 | 55853.20 | 53924.20 | 1699.77 o |
| -9  | 2 | 2 | 14445.60 | 13391.40 | 426.59 o  |
| -8  | 2 | 2 | 188.88   | 281.46   | 26.39 o   |
| -7  | 2 | 2 | 546.66   | 455.18   | 26.39 o   |
| -6  | 2 | 2 | 2636.19  | 3373.15  | 112.14 o  |
| -5  | 2 | 2 | 320.97   | 266.07   | 15.39 o   |
| -4  | 2 | 2 | 10976.70 | 10697.80 | 340.83 o  |
| -3  | 2 | 2 | 36.30    | -26.39   | 6.60 <    |
| -2  | 2 | 2 | 44209.90 | 40565.70 | 1275.38 o |
| -1  | 2 | 2 | 1402.17  | 1106.06  | 37.38 o   |
| 0   | 2 | 2 | 3628.46  | 3390.74  | 129.74 o  |
| 1   | 2 | 2 | 1352.10  | 925.75   | 32.98 o   |
| 2   | 2 | 2 | 1535.46  | 1420.50  | 48.38 o   |
| 3   | 2 | 2 | 177.88   | 92.35    | 8.80 o    |
| 4   | 2 | 2 | 24145.90 | 22246.50 | 699.26 o  |
| 5   | 2 | 2 | 1977.64  | 1609.61  | 54.97 o   |
| 6   | 2 | 2 | 1491.50  | 1537.05  | 54.97 o   |
| 7   | 2 | 2 | 753.97   | 853.18   | 37.38 o   |
| 8   | 2 | 2 | 12247.90 | 11300.30 | 417.80 o  |
| 9   | 2 | 2 | 1041.94  | 1044.49  | 41.78 o   |
| 10  | 2 | 2 | 1017.58  | 1018.10  | 41.78 o   |
| 11  | 2 | 2 | 4557.45  | 4389.05  | 145.13 o  |
| 12  | 2 | 2 | 570.52   | 582.72   | 28.59 o   |
| 13  | 2 | 2 | 215.76   | 228.69   | 21.99 o   |
| 14  | 2 | 2 | 1094.95  | 960.93   | 63.77 o   |
| 15  | 2 | 2 | 2817.36  | 2990.54  | 105.55 o  |
| 16  | 2 | 2 | 9984.12  | 11047.40 | 356.23 o  |
| 17  | 2 | 2 | 1196.56  | 1235.80  | 59.37 o   |
| 18  | 2 | 2 | 703.56   | 633.29   | 39.58 o   |
| 19  | 2 | 2 | 3978.92  | 4406.64  | 153.93 o  |
| 20  | 2 | 2 | 4195.74  | 4191.15  | 200.10 o  |
| -20 | 3 | 2 | 108.91   | 68.17    | 17.59 o   |
| -19 | 3 | 2 | 401.63   | 340.83   | 28.59 o   |
| -18 | 3 | 2 | 124.03   | 134.13   | 17.59 o   |
| -17 | 3 | 2 | 2928.07  | 2906.98  | 340.83 o  |
| -16 | 3 | 2 | 6565.86  | 6972.79  | 228.69 o  |

## regerite.cif

|     |   |   |          |          |         |   |
|-----|---|---|----------|----------|---------|---|
| -15 | 3 | 2 | 660.71   | 710.25   | 35.18   | o |
| -14 | 3 | 2 | 705.39   | 624.49   | 37.38   | o |
| -13 | 3 | 2 | 5489.09  | 5088.31  | 197.90  | o |
| -12 | 3 | 2 | 431.41   | 387.01   | 24.19   | o |
| -11 | 3 | 2 | 11.36    | 72.56    | 13.19   | o |
| -10 | 3 | 2 | 2980.88  | 2999.33  | 103.35  | o |
| -9  | 3 | 2 | 15873.90 | 16234.70 | 516.75  | o |
| -8  | 3 | 2 | 2994.48  | 3476.50  | 164.92  | o |
| -7  | 3 | 2 | 5226.62  | 5407.15  | 173.71  | o |
| -6  | 3 | 2 | 8763.94  | 9354.22  | 345.23  | o |
| -5  | 3 | 2 | 15081.00 | 13620.10 | 435.39  | o |
| -4  | 3 | 2 | 11422.70 | 10719.80 | 340.83  | o |
| -3  | 3 | 2 | 13704.90 | 14216.00 | 450.78  | o |
| -2  | 3 | 2 | 1768.02  | 1548.04  | 52.77   | o |
| -1  | 3 | 2 | 29123.40 | 25467.90 | 802.61  | o |
| 0   | 3 | 2 | 5.40     | -164.92  | 8.80    | < |
| 1   | 3 | 2 | 443.43   | 624.49   | 24.19   | o |
| 2   | 3 | 2 | 593.07   | 659.68   | 26.39   | o |
| 3   | 3 | 2 | 76099.60 | 70029.10 | 2194.53 | o |
| 4   | 3 | 2 | 3917.07  | 3322.57  | 107.75  | o |
| 5   | 3 | 2 | 319.56   | 461.77   | 21.99   | o |
| 6   | 3 | 2 | 6179.03  | 5565.48  | 208.90  | o |
| 7   | 3 | 2 | 3628.38  | 3538.07  | 136.33  | o |
| 8   | 3 | 2 | 0.57     | 0.00     | 10.99   | < |
| 9   | 3 | 2 | 681.41   | 694.86   | 30.78   | o |
| 10  | 3 | 2 | 5370.43  | 5215.85  | 171.52  | o |
| 11  | 3 | 2 | 5603.46  | 5627.05  | 186.91  | o |
| 12  | 3 | 2 | 1768.09  | 1649.19  | 61.57   | o |
| 13  | 3 | 2 | 1751.74  | 1774.53  | 76.96   | o |
| 14  | 3 | 2 | 688.47   | 743.24   | 41.78   | o |
| 15  | 3 | 2 | 128.99   | 151.73   | 17.59   | o |
| 16  | 3 | 2 | 3262.66  | 3309.38  | 116.54  | o |
| 17  | 3 | 2 | 1569.83  | 1620.61  | 72.56   | o |
| 18  | 3 | 2 | 1071.16  | 1187.42  | 50.58   | o |
| 19  | 3 | 2 | 2272.61  | 2198.92  | 83.56   | o |
| 20  | 3 | 2 | 233.64   | 195.70   | 24.19   | o |
| -20 | 4 | 2 | 299.87   | 246.28   | 26.39   | o |
| -19 | 4 | 2 | 20.58    | 37.38    | 10.99   | o |
| -18 | 4 | 2 | 1497.32  | 1407.31  | 63.77   | o |
| -17 | 4 | 2 | 2036.73  | 2104.37  | 123.14  | o |
| -16 | 4 | 2 | 11638.30 | 12228.20 | 457.38  | o |
| -15 | 4 | 2 | 59.96    | 63.77    | 13.19   | o |
| -14 | 4 | 2 | 7.01     | 30.78    | 13.19   | < |
| -13 | 4 | 2 | 757.89   | 611.30   | 32.98   | o |
| -12 | 4 | 2 | 9349.45  | 9472.96  | 307.85  | o |
| -11 | 4 | 2 | 1310.92  | 1103.86  | 46.18   | o |
| -10 | 4 | 2 | 6.21     | 19.79    | 13.19   | < |
| -9  | 4 | 2 | 1886.62  | 1807.52  | 65.97   | o |
| -8  | 4 | 2 | 66009.90 | 71748.70 | 2621.12 | o |
| -7  | 4 | 2 | 1148.84  | 782.82   | 32.98   | o |
| -6  | 4 | 2 | 16909.70 | 17228.60 | 633.29  | o |
| -5  | 4 | 2 | 2204.30  | 2106.57  | 72.56   | o |
| -4  | 4 | 2 | 14318.20 | 14790.00 | 470.57  | o |
| -3  | 4 | 2 | 2507.89  | 2304.47  | 79.16   | o |



## regerite.cif

|     |   |   |           |           |         |   |
|-----|---|---|-----------|-----------|---------|---|
| -2  | 4 | 2 | 82.50     | 180.31    | 13.19   | o |
| -1  | 4 | 2 | 2130.52   | 2119.76   | 72.56   | o |
| 0   | 4 | 2 | 28141.50  | 24979.80  | 789.41  | o |
| 1   | 4 | 2 | 3716.13   | 3496.29   | 116.54  | o |
| 2   | 4 | 2 | 88950.90  | 85043.40  | 2667.29 | o |
| 3   | 4 | 2 | 423.27    | 483.76    | 21.99   | o |
| 4   | 4 | 2 | 13696.00  | 11163.90  | 354.03  | o |
| 5   | 4 | 2 | 266.69    | 162.72    | 13.19   | o |
| 6   | 4 | 2 | 2274.33   | 2414.42   | 81.36   | o |
| 7   | 4 | 2 | 204.54    | 283.66    | 19.79   | o |
| 8   | 4 | 2 | 735.89    | 697.06    | 35.18   | o |
| 9   | 4 | 2 | 1236.02   | 1108.26   | 43.98   | o |
| 10  | 4 | 2 | 22452.70  | 23053.50  | 730.04  | o |
| 11  | 4 | 2 | 1850.99   | 1875.68   | 68.17   | o |
| 12  | 4 | 2 | 6829.87   | 7216.87   | 235.29  | o |
| 13  | 4 | 2 | 0.89      | 30.78     | 17.59   | < |
| 14  | 4 | 2 | 13446.50  | 14290.80  | 534.34  | o |
| 15  | 4 | 2 | 37.14     | 26.39     | 10.99   | < |
| 16  | 4 | 2 | 53.76     | 63.77     | 13.19   | o |
| 17  | 4 | 2 | 2114.02   | 2236.31   | 96.75   | o |
| 18  | 4 | 2 | 5264.37   | 6007.46   | 202.30  | o |
| 19  | 4 | 2 | 64.45     | 39.58     | 13.19   | < |
| 20  | 4 | 2 | 942.82    | 710.25    | 61.57   | o |
| -20 | 5 | 2 | 4.74      | 21.99     | 15.39   | < |
| -19 | 5 | 2 | 389.54    | 360.62    | 24.19   | o |
| -18 | 5 | 2 | 387.65    | 398.01    | 28.59   | o |
| -17 | 5 | 2 | 2659.63   | 2671.69   | 98.95   | o |
| -16 | 5 | 2 | 2095.40   | 2124.16   | 92.35   | o |
| -15 | 5 | 2 | 611.73    | 578.32    | 32.98   | o |
| -14 | 5 | 2 | 26.31     | 17.59     | 15.39   | < |
| -13 | 5 | 2 | 5787.34   | 6091.02   | 204.50  | o |
| -12 | 5 | 2 | 79.06     | 85.76     | 17.59   | o |
| -11 | 5 | 2 | 9530.12   | 10941.80  | 349.63  | o |
| -10 | 5 | 2 | 9.07      | 13.19     | 10.99   | < |
| -9  | 5 | 2 | 335.54    | 281.46    | 19.79   | o |
| -8  | 5 | 2 | 26.57     | 6.60      | 8.80    | < |
| -7  | 5 | 2 | 576.25    | 389.21    | 24.19   | o |
| -6  | 5 | 2 | 14.11     | 10.99     | 79.16   | < |
| -5  | 5 | 2 | 34856.80  | 41495.90  | 1510.66 | o |
| -4  | 5 | 2 | 329.38    | 321.04    | 19.79   | o |
| -3  | 5 | 2 | 120064.00 | 124340.00 | 3922.88 | o |
| -2  | 5 | 2 | 2805.07   | 2240.70   | 76.96   | o |
| -1  | 5 | 2 | 5788.40   | 5506.10   | 178.11  | o |
| 0   | 5 | 2 | 7000.02   | 5275.22   | 171.52  | o |
| 1   | 5 | 2 | 3850.39   | 4138.37   | 134.13  | o |
| 2   | 5 | 2 | 3252.13   | 2665.10   | 90.16   | o |
| 3   | 5 | 2 | 62787.10  | 57343.50  | 1803.12 | o |
| 4   | 5 | 2 | 2397.61   | 2304.47   | 79.16   | o |
| 5   | 5 | 2 | 24293.90  | 23768.20  | 866.38  | o |
| 6   | 5 | 2 | 80.14     | 13.19     | 10.99   | < |
| 7   | 5 | 2 | 2122.82   | 2478.19   | 85.76   | o |
| 8   | 5 | 2 | 1989.10   | 2124.16   | 87.96   | o |
| 9   | 5 | 2 | 25620.10  | 25705.40  | 813.60  | o |
| 10  | 5 | 2 | 1377.59   | 1288.57   | 50.58   | o |

## regerite.cif

|     |   |   |           |           |           |
|-----|---|---|-----------|-----------|-----------|
| 11  | 5 | 2 | 2639.40   | 2805.83   | 98.95 o   |
| 12  | 5 | 2 | 4777.68   | 5407.15   | 206.70 o  |
| 13  | 5 | 2 | 5686.51   | 5983.27   | 230.89 o  |
| 14  | 5 | 2 | 11015.60  | 12690.00  | 409.00 o  |
| 15  | 5 | 2 | 4501.93   | 4696.90   | 160.52 o  |
| 16  | 5 | 2 | 1166.85   | 1211.61   | 52.77 o   |
| 17  | 5 | 2 | 2578.89   | 2968.55   | 123.14 o  |
| 18  | 5 | 2 | 1416.76   | 1424.90   | 59.37 o   |
| 19  | 5 | 2 | 897.18    | 921.35    | 43.98 o   |
| 20  | 5 | 2 | 484.41    | 327.64    | 39.58 o   |
| -19 | 6 | 2 | 2705.67   | 3142.26   | 261.67 o  |
| -18 | 6 | 2 | 2716.79   | 3012.53   | 109.95 o  |
| -17 | 6 | 2 | 3.03      | 30.78     | 13.19 <   |
| -16 | 6 | 2 | 1152.31   | 1077.47   | 48.38 o   |
| -15 | 6 | 2 | 733.88    | 701.46    | 37.38 o   |
| -14 | 6 | 2 | 3363.63   | 3676.60   | 149.53 o  |
| -13 | 6 | 2 | 561.70    | 499.16    | 35.18 o   |
| -12 | 6 | 2 | 8.27      | 57.17     | 24.19 <   |
| -11 | 6 | 2 | 1624.64   | 1996.62   | 72.56 o   |
| -10 | 6 | 2 | 19146.60  | 20962.30  | 664.08 o  |
| -9  | 6 | 2 | 77.22     | 74.76     | 13.19 o   |
| -8  | 6 | 2 | 35.06     | 114.34    | 13.19 o   |
| -7  | 6 | 2 | 3339.11   | 3175.25   | 125.34 o  |
| -6  | 6 | 2 | 6050.71   | 7590.69   | 283.66 o  |
| -5  | 6 | 2 | 521.74    | 470.57    | 28.59 o   |
| -4  | 6 | 2 | 12695.60  | 13958.80  | 514.55 o  |
| -3  | 6 | 2 | 370.84    | 457.38    | 24.19 o   |
| -2  | 6 | 2 | 62045.20  | 51512.00  | 1627.20 o |
| -1  | 6 | 2 | 0.20      | -2.20     | 8.80 <    |
| 0   | 6 | 2 | 53787.00  | 49755.00  | 1565.63 o |
| 1   | 6 | 2 | 223.21    | 171.52    | 13.19 o   |
| 2   | 6 | 2 | 1315.42   | 1519.46   | 54.97 o   |
| 3   | 6 | 2 | 327.51    | 261.67    | 17.59 o   |
| 4   | 6 | 2 | 118884.00 | 116420.00 | 4224.13 o |
| 5   | 6 | 2 | 76.88     | 39.58     | 10.99 o   |
| 6   | 6 | 2 | 19027.50  | 16817.40  | 620.10 o  |
| 7   | 6 | 2 | 1752.12   | 1748.14   | 70.37 o   |
| 8   | 6 | 2 | 49905.90  | 51034.80  | 1607.41 o |
| 9   | 6 | 2 | 13972.70  | 14376.60  | 457.38 o  |
| 10  | 6 | 2 | 2336.05   | 2425.41   | 85.76 o   |
| 11  | 6 | 2 | 880.08    | 820.20    | 37.38 o   |
| 12  | 6 | 2 | 17412.80  | 18939.30  | 600.31 o  |
| 13  | 6 | 2 | 947.92    | 996.11    | 43.98 o   |
| 14  | 6 | 2 | 11512.40  | 12314.00  | 398.01 o  |
| 15  | 6 | 2 | 69.64     | 90.16     | 17.59 o   |
| 16  | 6 | 2 | 54.10     | 120.94    | 17.59 o   |
| 17  | 6 | 2 | 4832.23   | 5820.55   | 226.49 o  |
| 18  | 6 | 2 | 688.44    | 655.28    | 35.18 o   |
| 19  | 6 | 2 | 4531.49   | 4630.93   | 184.71 o  |
| -19 | 7 | 2 | 1270.13   | 1132.45   | 54.97 o   |
| -18 | 7 | 2 | 422.48    | 452.98    | 28.59 o   |
| -17 | 7 | 2 | 542.30    | 589.31    | 39.58 o   |
| -16 | 7 | 2 | 7452.86   | 8241.57   | 299.05 o  |
| -15 | 7 | 2 | 4973.20   | 5473.12   | 186.91 o  |

## regerite.cif

|     |   |   |          |          |           |
|-----|---|---|----------|----------|-----------|
| -14 | 7 | 2 | 717.15   | 692.66   | 37.38 o   |
| -13 | 7 | 2 | 1323.56  | 1471.08  | 76.96 o   |
| -12 | 7 | 2 | 1001.08  | 1081.87  | 54.97 o   |
| -11 | 7 | 2 | 4542.45  | 4771.66  | 160.52 o  |
| -10 | 7 | 2 | 1870.60  | 1895.47  | 81.36 o   |
| -9  | 7 | 2 | 229.07   | 259.47   | 17.59 o   |
| -8  | 7 | 2 | 927.15   | 949.93   | 39.58 o   |
| -7  | 7 | 2 | 21694.90 | 22077.20 | 701.46 o  |
| -6  | 7 | 2 | 749.58   | 609.10   | 35.18 o   |
| -5  | 7 | 2 | 44005.20 | 46392.90 | 1693.17 o |
| -4  | 7 | 2 | 2147.36  | 2071.39  | 87.96 o   |
| -3  | 7 | 2 | 8417.10  | 9004.59  | 292.46 o  |
| -2  | 7 | 2 | 347.49   | 241.88   | 19.79 o   |
| -1  | 7 | 2 | 268.74   | 277.06   | 21.99 o   |
| 0   | 7 | 2 | 1356.91  | 877.37   | 43.98 o   |
| 1   | 7 | 2 | 1368.31  | 1666.78  | 72.56 o   |
| 2   | 7 | 2 | 1622.09  | 1365.53  | 61.57 o   |
| 3   | 7 | 2 | 31785.70 | 26486.00 | 837.79 o  |
| 4   | 7 | 2 | 5200.59  | 5222.44  | 171.52 o  |
| 5   | 7 | 2 | 1601.69  | 1163.23  | 63.77 o   |
| 6   | 7 | 2 | 4752.43  | 4072.41  | 136.33 o  |
| 7   | 7 | 2 | 44443.20 | 42593.20 | 1548.04 o |
| 8   | 7 | 2 | 492.83   | 527.74   | 28.59 o   |
| 9   | 7 | 2 | 46894.10 | 47929.90 | 1510.66 o |
| 10  | 7 | 2 | 181.71   | 164.92   | 17.59 o   |
| 11  | 7 | 2 | 246.82   | 228.69   | 24.19 o   |
| 12  | 7 | 2 | 6537.66  | 7342.21  | 277.06 o  |
| 13  | 7 | 2 | 729.93   | 877.37   | 41.78 o   |
| 14  | 7 | 2 | 2382.48  | 2570.54  | 94.55 o   |
| 15  | 7 | 2 | 4751.75  | 5385.16  | 180.31 o  |
| 16  | 7 | 2 | 22.48    | 6.60     | 15.39 <   |
| 17  | 7 | 2 | 9344.96  | 10752.70 | 349.63 o  |
| 18  | 7 | 2 | 4818.79  | 5295.01  | 182.51 o  |
| 19  | 7 | 2 | 1236.89  | 967.53   | 54.97 o   |
| -19 | 8 | 2 | 81.74    | 50.58    | 19.79 <   |
| -18 | 8 | 2 | 97.68    | 142.93   | 17.59 o   |
| -17 | 8 | 2 | 4815.17  | 5224.64  | 180.31 o  |
| -16 | 8 | 2 | 8273.89  | 9193.70  | 349.63 o  |
| -15 | 8 | 2 | 1692.95  | 1844.90  | 72.56 o   |
| -14 | 8 | 2 | 199.32   | 208.90   | 21.99 o   |
| -13 | 8 | 2 | 23.82    | 28.59    | 15.39 <   |
| -12 | 8 | 2 | 731.89   | 760.83   | 43.98 o   |
| -11 | 8 | 2 | 2023.75  | 2165.94  | 98.95 o   |
| -10 | 8 | 2 | 2426.10  | 2852.00  | 101.15 o  |
| -9  | 8 | 2 | 3345.55  | 3812.93  | 149.53 o  |
| -8  | 8 | 2 | 4115.46  | 4455.02  | 160.52 o  |
| -7  | 8 | 2 | 77.88    | 65.97    | 13.19 o   |
| -6  | 8 | 2 | 1305.74  | 1292.97  | 50.58 o   |
| -5  | 8 | 2 | 4473.58  | 3832.72  | 131.93 o  |
| -4  | 8 | 2 | 6.19     | 35.18    | 10.99 o   |
| -3  | 8 | 2 | 892.76   | 708.05   | 39.58 o   |
| -2  | 8 | 2 | 5963.96  | 5488.51  | 182.51 o  |
| -1  | 8 | 2 | 76.36    | 57.17    | 13.19 o   |
| 0   | 8 | 2 | 1180.22  | 978.52   | 41.78 o   |

## regerite.cif

|     |   |   |          |          |           |
|-----|---|---|----------|----------|-----------|
| 1   | 8 | 2 | 3176.58  | 2651.90  | 94.55 o   |
| 2   | 8 | 2 | 3209.26  | 3008.13  | 103.35 o  |
| 3   | 8 | 2 | 39.36    | 24.19    | 13.19 <   |
| 4   | 8 | 2 | 20135.10 | 18611.70 | 688.26 o  |
| 5   | 8 | 2 | 1640.40  | 1442.49  | 57.17 o   |
| 6   | 8 | 2 | 219.10   | 202.30   | 19.79 o   |
| 7   | 8 | 2 | 3414.99  | 3168.65  | 118.74 o  |
| 8   | 8 | 2 | 50.14    | 63.77    | 13.19 o   |
| 9   | 8 | 2 | 3068.07  | 3098.28  | 107.75 o  |
| 10  | 8 | 2 | 149.49   | 156.12   | 17.59 o   |
| 11  | 8 | 2 | 3947.68  | 4393.45  | 158.32 o  |
| 12  | 8 | 2 | 3818.18  | 4105.39  | 142.93 o  |
| 13  | 8 | 2 | 840.88   | 780.62   | 46.18 o   |
| 14  | 8 | 2 | 24.94    | 50.58    | 15.39 o   |
| 15  | 8 | 2 | 194.39   | 208.90   | 21.99 o   |
| 16  | 8 | 2 | 139.90   | 116.54   | 19.79 o   |
| 17  | 8 | 2 | 2411.57  | 2603.53  | 116.54 o  |
| 18  | 8 | 2 | 820.08   | 745.43   | 39.58 o   |
| 19  | 8 | 2 | 407.16   | 316.64   | 39.58 o   |
| -18 | 9 | 2 | 261.23   | 226.49   | 26.39 o   |
| -17 | 9 | 2 | 14046.30 | 15922.40 | 514.55 o  |
| -16 | 9 | 2 | 1672.80  | 1704.17  | 83.56 o   |
| -15 | 9 | 2 | 111.29   | 191.31   | 21.99 o   |
| -14 | 9 | 2 | 28.59    | 50.58    | 15.39 o   |
| -13 | 9 | 2 | 3888.88  | 4778.26  | 160.52 o  |
| -12 | 9 | 2 | 76.85    | 92.35    | 17.59 o   |
| -11 | 9 | 2 | 997.63   | 1055.48  | 46.18 o   |
| -10 | 9 | 2 | 1451.78  | 1640.40  | 72.56 o   |
| -9  | 9 | 2 | 25364.30 | 29846.00 | 1090.67 o |
| -8  | 9 | 2 | 1491.98  | 1640.40  | 63.77 o   |
| -7  | 9 | 2 | 6429.62  | 6722.11  | 255.07 o  |
| -6  | 9 | 2 | 44.63    | 72.56    | 15.39 o   |
| -5  | 9 | 2 | 1745.99  | 1682.18  | 63.77 o   |
| -4  | 9 | 2 | 506.31   | 437.59   | 151.73 <  |
| -3  | 9 | 2 | 75144.40 | 70913.10 | 2236.31 o |
| -2  | 9 | 2 | 368.11   | 318.84   | 21.99 o   |
| -1  | 9 | 2 | 137.69   | 63.77    | 17.59 o   |
| 0   | 9 | 2 | 12.44    | 10.99    | 15.39 <   |
| 1   | 9 | 2 | 20447.60 | 20285.10 | 916.95 o  |
| 2   | 9 | 2 | 655.03   | 580.52   | 35.18 o   |
| 3   | 9 | 2 | 1029.35  | 897.16   | 39.58 o   |
| 4   | 9 | 2 | 56.66    | 61.57    | 13.19 o   |
| 5   | 9 | 2 | 21608.60 | 21081.10 | 774.02 o  |
| 6   | 9 | 2 | 106.61   | 164.92   | 17.59 o   |
| 7   | 9 | 2 | 6817.64  | 6671.53  | 219.89 o  |
| 8   | 9 | 2 | 136.56   | 160.52   | 17.59 o   |
| 9   | 9 | 2 | 1018.88  | 976.32   | 43.98 o   |
| 10  | 9 | 2 | 13.22    | 30.78    | 17.59 <   |
| 11  | 9 | 2 | 6731.92  | 7150.90  | 272.67 o  |
| 12  | 9 | 2 | 1592.03  | 1765.74  | 68.17 o   |
| 13  | 9 | 2 | 3398.61  | 3568.85  | 136.33 o  |
| 14  | 9 | 2 | 350.90   | 310.05   | 26.39 o   |
| 15  | 9 | 2 | 10886.20 | 11665.30 | 441.98 o  |
| 16  | 9 | 2 | 6.41     | 28.59    | 15.39 <   |

## regerite.cif

|     |    |   |          |          |           |
|-----|----|---|----------|----------|-----------|
| 17  | 9  | 2 | 393.66   | 380.41   | 28.59 o   |
| 18  | 9  | 2 | 18.42    | 32.98    | 17.59 <   |
| 19  | 9  | 2 | 44.15    | 41.78    | 17.59 <   |
| -18 | 10 | 2 | 46.75    | 2.20     | 19.79 <   |
| -17 | 10 | 2 | 1519.53  | 1537.05  | 65.97 o   |
| -16 | 10 | 2 | 1610.04  | 1726.16  | 70.37 o   |
| -15 | 10 | 2 | 110.07   | 134.13   | 26.39 o   |
| -14 | 10 | 2 | 3506.81  | 4362.66  | 149.53 o  |
| -13 | 10 | 2 | 275.55   | 373.82   | 26.39 o   |
| -12 | 10 | 2 | 2179.70  | 2667.29  | 96.75 o   |
| -11 | 10 | 2 | 535.71   | 576.12   | 39.58 o   |
| -10 | 10 | 2 | 574.67   | 705.85   | 43.98 o   |
| -9  | 10 | 2 | 1304.83  | 1363.33  | 57.17 o   |
| -8  | 10 | 2 | 36840.20 | 38045.80 | 1202.81 o |
| -7  | 10 | 2 | 3.08     | 19.79    | 13.19 <   |
| -6  | 10 | 2 | 188.91   | 107.75   | 494.76 <  |
| -5  | 10 | 2 | 1841.05  | 1506.26  | 68.17 o   |
| -4  | 10 | 2 | 42413.70 | 42061.00 | 1328.15 o |
| -3  | 10 | 2 | 18.02    | 26.39    | 15.39 <   |
| -2  | 10 | 2 | 6338.65  | 6500.02  | 248.48 o  |
| -1  | 10 | 2 | 186.73   | 314.45   | 21.99 o   |
| 0   | 10 | 2 | 43481.10 | 40724.10 | 1288.57 o |
| 1   | 10 | 2 | 2184.51  | 1693.17  | 65.97 o   |
| 2   | 10 | 2 | 50511.60 | 49715.50 | 1572.23 o |
| 3   | 10 | 2 | 1.63     | -4.40    | 13.19 <   |
| 4   | 10 | 2 | 3954.12  | 3738.17  | 127.54 o  |
| 5   | 10 | 2 | 740.69   | 595.91   | 32.98 o   |
| 6   | 10 | 2 | 412.36   | 457.38   | 28.59 o   |
| 7   | 10 | 2 | 1728.65  | 1616.21  | 65.97 o   |
| 8   | 10 | 2 | 740.35   | 853.18   | 39.58 o   |
| 9   | 10 | 2 | 284.20   | 283.66   | 28.59 o   |
| 10  | 10 | 2 | 8715.17  | 9268.46  | 301.25 o  |
| 11  | 10 | 2 | 1312.98  | 1484.27  | 61.57 o   |
| 12  | 10 | 2 | 5289.58  | 5671.02  | 222.09 o  |
| 13  | 10 | 2 | 476.20   | 516.75   | 30.78 o   |
| 14  | 10 | 2 | 2757.29  | 3107.08  | 109.95 o  |
| 15  | 10 | 2 | 68.21    | 72.56    | 17.59 o   |
| 16  | 10 | 2 | 598.97   | 666.27   | 37.38 o   |
| 17  | 10 | 2 | 69.83    | 61.57    | 17.59 o   |
| 18  | 10 | 2 | 653.97   | 514.55   | 39.58 o   |
| -18 | 11 | 2 | 953.81   | 820.20   | 61.57 o   |
| -17 | 11 | 2 | 28.32    | 52.77    | 17.59 o   |
| -16 | 11 | 2 | 2.50     | 17.59    | 17.59 <   |
| -15 | 11 | 2 | 9900.95  | 12793.30 | 479.36 o  |
| -14 | 11 | 2 | 2322.81  | 2955.35  | 114.34 o  |
| -13 | 11 | 2 | 5548.19  | 6420.86  | 215.49 o  |
| -12 | 11 | 2 | 657.55   | 653.08   | 35.18 o   |
| -11 | 11 | 2 | 6254.35  | 7170.69  | 235.29 o  |
| -10 | 11 | 2 | 36.23    | 35.18    | 19.79 <   |
| -9  | 11 | 2 | 19141.10 | 19438.50 | 622.29 o  |
| -8  | 11 | 2 | 578.17   | 628.89   | 35.18 o   |
| -7  | 11 | 2 | 130.12   | 129.74   | 17.59 o   |
| -6  | 11 | 2 | 688.27   | 591.51   | 37.38 o   |
| -5  | 11 | 2 | 6135.96  | 6051.44  | 217.69 o  |

## regerite.cif

|     |    |   |          |          |         |   |
|-----|----|---|----------|----------|---------|---|
| -4  | 11 | 2 | 2272.94  | 2234.11  | 90.16   | o |
| -3  | 11 | 2 | 4748.65  | 4813.44  | 189.11  | o |
| -2  | 11 | 2 | 203.70   | 197.90   | 19.79   | o |
| -1  | 11 | 2 | 1071.12  | 804.81   | 37.38   | o |
| 0   | 11 | 2 | 46.84    | 54.97    | 13.19   | o |
| 1   | 11 | 2 | 265.02   | 281.46   | 21.99   | o |
| 2   | 11 | 2 | 50.32    | 30.78    | 13.19   | < |
| 3   | 11 | 2 | 16716.50 | 16338.00 | 525.54  | o |
| 4   | 11 | 2 | 386.71   | 433.19   | 26.39   | o |
| 5   | 11 | 2 | 429.18   | 532.14   | 28.59   | o |
| 6   | 11 | 2 | 108.57   | 70.37    | 15.39   | o |
| 7   | 11 | 2 | 1073.54  | 1059.88  | 48.38   | o |
| 8   | 11 | 2 | 19.93    | 13.19    | 17.59   | < |
| 9   | 11 | 2 | 39.14    | 37.38    | 15.39   | < |
| 10  | 11 | 2 | 1480.68  | 1594.22  | 72.56   | o |
| 11  | 11 | 2 | 9872.66  | 10497.70 | 340.83  | o |
| 12  | 11 | 2 | 296.05   | 252.88   | 61.57   | o |
| 13  | 11 | 2 | 7321.54  | 8127.22  | 285.86  | o |
| 14  | 11 | 2 | 442.58   | 499.16   | 32.98   | o |
| 15  | 11 | 2 | 3102.47  | 3199.43  | 131.93  | o |
| 16  | 11 | 2 | 1265.65  | 1352.34  | 59.37   | o |
| 17  | 11 | 2 | 2005.00  | 1930.66  | 105.55  | o |
| 18  | 11 | 2 | 3.33     | 32.98    | 24.19   | < |
| -17 | 12 | 2 | 1094.59  | 1178.62  | 61.57   | o |
| -16 | 12 | 2 | 1911.58  | 2031.81  | 81.36   | o |
| -15 | 12 | 2 | 1354.06  | 1688.77  | 70.37   | o |
| -14 | 12 | 2 | 4730.48  | 5673.22  | 226.49  | o |
| -13 | 12 | 2 | 414.78   | 448.58   | 30.78   | o |
| -12 | 12 | 2 | 199.23   | 228.69   | 24.19   | o |
| -11 | 12 | 2 | 373.33   | 338.63   | 26.39   | o |
| -10 | 12 | 2 | 7391.63  | 7694.03  | 292.46  | o |
| -9  | 12 | 2 | 5941.86  | 6038.24  | 235.29  | o |
| -8  | 12 | 2 | 4107.38  | 4046.02  | 140.73  | o |
| -7  | 12 | 2 | 2342.87  | 2172.54  | 83.56   | o |
| -6  | 12 | 2 | 2862.45  | 2902.58  | 105.55  | o |
| -5  | 12 | 2 | 741.96   | 578.32   | 32.98   | o |
| -4  | 12 | 2 | 37398.00 | 35334.50 | 1297.36 | o |
| -3  | 12 | 2 | 102.18   | 98.95    | 15.39   | o |
| -2  | 12 | 2 | 344.68   | 274.86   | 26.39   | o |
| -1  | 12 | 2 | 360.69   | 222.09   | 19.79   | o |
| 0   | 12 | 2 | 7.90     | 26.39    | 13.19   | < |
| 1   | 12 | 2 | 3198.69  | 2937.76  | 107.75  | o |
| 2   | 12 | 2 | 1190.86  | 1152.24  | 50.58   | o |
| 3   | 12 | 2 | 178.15   | 160.52   | 17.59   | o |
| 4   | 12 | 2 | 614.29   | 474.97   | 28.59   | o |
| 5   | 12 | 2 | 6478.92  | 6662.74  | 222.09  | o |
| 6   | 12 | 2 | 264.05   | 318.84   | 24.19   | o |
| 7   | 12 | 2 | 565.75   | 589.31   | 41.78   | o |
| 8   | 12 | 2 | 2060.93  | 2368.24  | 90.16   | o |
| 9   | 12 | 2 | 203.66   | 213.30   | 21.99   | o |
| 10  | 12 | 2 | 2027.89  | 2128.56  | 81.36   | o |
| 11  | 12 | 2 | 2978.15  | 3076.29  | 191.31  | o |
| 12  | 12 | 2 | 208.27   | 217.69   | 21.99   | o |
| 13  | 12 | 2 | 525.23   | 569.52   | 41.78   | o |

## regerite.cif

|     |    |   |          |          |           |
|-----|----|---|----------|----------|-----------|
| 14  | 12 | 2 | 3600.84  | 3933.87  | 160.52 o  |
| 15  | 12 | 2 | 582.20   | 582.72   | 37.38 o   |
| 16  | 12 | 2 | 3685.87  | 3834.92  | 140.73 o  |
| 17  | 12 | 2 | 616.15   | 446.38   | 41.78 o   |
| -17 | 13 | 2 | 852.91   | 730.04   | 85.76 o   |
| -16 | 13 | 2 | 7.73     | 2.20     | 17.59 <   |
| -15 | 13 | 2 | 671.38   | 679.47   | 39.58 o   |
| -14 | 13 | 2 | 2404.19  | 2557.35  | 101.15 o  |
| -13 | 13 | 2 | 2037.79  | 1996.62  | 90.16 o   |
| -12 | 13 | 2 | 1921.52  | 1990.03  | 79.16 o   |
| -11 | 13 | 2 | 4321.45  | 4771.66  | 259.47 o  |
| -10 | 13 | 2 | 2997.16  | 3206.03  | 116.54 o  |
| -9  | 13 | 2 | 1031.86  | 1158.83  | 112.14 o  |
| -8  | 13 | 2 | 611.49   | 514.55   | 37.38 o   |
| -7  | 13 | 2 | 5781.23  | 5607.26  | 191.31 o  |
| -6  | 13 | 2 | 7.28     | 2.20     | 13.19 <   |
| -5  | 13 | 2 | 12760.20 | 12984.60 | 422.19 o  |
| -4  | 13 | 2 | 2388.83  | 2220.91  | 92.35 o   |
| -3  | 13 | 2 | 19439.30 | 18774.40 | 598.11 o  |
| -2  | 13 | 2 | 135.85   | 162.72   | 21.99 o   |
| -1  | 13 | 2 | 10658.40 | 10867.10 | 356.23 o  |
| 0   | 13 | 2 | 380.38   | 362.82   | 30.78 o   |
| 1   | 13 | 2 | 24033.90 | 23203.00 | 738.84 o  |
| 2   | 13 | 2 | 1.47     | 17.59    | 15.39 <   |
| 3   | 13 | 2 | 40373.60 | 39859.90 | 1262.18 o |
| 4   | 13 | 2 | 96.01    | 145.13   | 17.59 o   |
| 5   | 13 | 2 | 33317.40 | 35011.30 | 1277.57 o |
| 6   | 13 | 2 | 441.53   | 380.41   | 26.39 o   |
| 7   | 13 | 2 | 10049.40 | 11021.00 | 358.42 o  |
| 8   | 13 | 2 | 181.14   | 153.93   | 21.99 o   |
| 9   | 13 | 2 | 191.91   | 191.31   | 37.38 o   |
| 10  | 13 | 2 | 3221.48  | 3487.49  | 125.34 o  |
| 11  | 13 | 2 | 883.35   | 842.19   | 43.98 o   |
| 12  | 13 | 2 | 650.13   | 598.11   | 35.18 o   |
| 13  | 13 | 2 | 9544.00  | 10211.80 | 345.23 o  |
| 14  | 13 | 2 | 3481.59  | 3724.98  | 138.53 o  |
| 15  | 13 | 2 | 4106.27  | 4382.46  | 171.52 o  |
| 16  | 13 | 2 | 5659.94  | 6522.01  | 338.63 o  |
| 17  | 13 | 2 | 14.50    | 35.18    | 32.98 <   |
| -16 | 14 | 2 | 2535.26  | 2377.04  | 131.93 o  |
| -15 | 14 | 2 | 4.32     | 30.78    | 17.59 <   |
| -14 | 14 | 2 | 321.75   | 316.64   | 26.39 o   |
| -13 | 14 | 2 | 1.63     | 28.59    | 19.79 <   |
| -12 | 14 | 2 | 1431.96  | 1227.00  | 61.57 o   |
| -11 | 14 | 2 | 327.90   | 316.64   | 26.39 o   |
| -10 | 14 | 2 | 416.23   | 406.80   | 37.38 o   |
| -9  | 14 | 2 | 894.30   | 822.40   | 46.18 o   |
| -8  | 14 | 2 | 3000.50  | 3254.41  | 134.13 o  |
| -7  | 14 | 2 | 142.93   | 127.54   | 19.79 o   |
| -6  | 14 | 2 | 3.65     | 32.98    | 17.59 <   |
| -5  | 14 | 2 | 260.41   | 294.66   | 24.19 o   |
| -4  | 14 | 2 | 4386.56  | 3999.84  | 162.72 o  |
| -3  | 14 | 2 | 615.96   | 600.31   | 39.58 o   |
| -2  | 14 | 2 | 5176.89  | 5141.08  | 175.91 o  |

## regerite.cif

|     |    |   |          |          |        |   |
|-----|----|---|----------|----------|--------|---|
| -1  | 14 | 2 | 372.84   | 406.80   | 32.98  | o |
| 0   | 14 | 2 | 5041.61  | 4951.98  | 197.90 | o |
| 1   | 14 | 2 | 457.76   | 466.17   | 30.78  | o |
| 2   | 14 | 2 | 9769.57  | 9739.03  | 406.80 | o |
| 3   | 14 | 2 | 216.27   | 191.31   | 24.19  | o |
| 4   | 14 | 2 | 2321.84  | 2174.74  | 85.76  | o |
| 5   | 14 | 2 | 87.35    | 107.75   | 17.59  | o |
| 6   | 14 | 2 | 1048.15  | 1009.31  | 54.97  | o |
| 7   | 14 | 2 | 0.33     | 32.98    | 15.39  | < |
| 8   | 14 | 2 | 1055.74  | 1222.60  | 54.97  | o |
| 9   | 14 | 2 | 465.20   | 468.37   | 30.78  | o |
| 10  | 14 | 2 | 19983.10 | 21402.10 | 681.67 | o |
| 11  | 14 | 2 | 12.60    | 6.60     | 15.39  | < |
| 12  | 14 | 2 | 5209.94  | 5838.14  | 200.10 | o |
| 13  | 14 | 2 | 459.89   | 426.59   | 32.98  | o |
| 14  | 14 | 2 | 520.74   | 409.00   | 37.38  | o |
| 15  | 14 | 2 | 30.46    | 41.78    | 17.59  | < |
| 16  | 14 | 2 | 3351.33  | 3219.22  | 208.90 | o |
| -15 | 15 | 2 | 569.36   | 415.60   | 30.78  | o |
| -14 | 15 | 2 | 2097.44  | 2280.28  | 92.35  | o |
| -13 | 15 | 2 | 331.19   | 292.46   | 26.39  | o |
| -12 | 15 | 2 | 4.13     | 32.98    | 19.79  | < |
| -11 | 15 | 2 | 104.32   | 79.16    | 17.59  | o |
| -10 | 15 | 2 | 95.04    | 105.55   | 17.59  | o |
| -9  | 15 | 2 | 25.94    | 30.78    | 17.59  | < |
| -8  | 15 | 2 | 7.09     | 30.78    | 15.39  | < |
| -7  | 15 | 2 | 8171.88  | 8325.12  | 274.86 | o |
| -6  | 15 | 2 | 528.33   | 617.90   | 35.18  | o |
| -5  | 15 | 2 | 17863.20 | 18655.70 | 595.91 | o |
| -4  | 15 | 2 | 816.54   | 861.98   | 63.77  | o |
| -3  | 15 | 2 | 1130.59  | 1262.18  | 54.97  | o |
| -2  | 15 | 2 | 48.44    | 26.39    | 43.98  | < |
| -1  | 15 | 2 | 13282.70 | 13380.50 | 433.19 | o |
| 0   | 15 | 2 | 79.10    | 92.35    | 17.59  | o |
| 1   | 15 | 2 | 6780.15  | 6981.58  | 272.67 | o |
| 2   | 15 | 2 | 0.75     | -19.79   | 15.39  | < |
| 3   | 15 | 2 | 5439.87  | 5677.62  | 239.68 | o |
| 4   | 15 | 2 | 515.49   | 466.17   | 37.38  | o |
| 5   | 15 | 2 | 747.20   | 793.81   | 48.38  | o |
| 6   | 15 | 2 | 1174.52  | 1211.61  | 57.17  | o |
| 7   | 15 | 2 | 89.84    | 118.74   | 19.79  | o |
| 8   | 15 | 2 | 127.81   | 109.95   | 17.59  | o |
| 9   | 15 | 2 | 2966.45  | 2810.22  | 105.55 | o |
| 10  | 15 | 2 | 441.35   | 479.36   | 32.98  | o |
| 11  | 15 | 2 | 6443.16  | 6603.37  | 224.29 | o |
| 12  | 15 | 2 | 102.26   | 103.35   | 19.79  | o |
| 13  | 15 | 2 | 491.98   | 376.02   | 28.59  | o |
| 14  | 15 | 2 | 37.11    | 50.58    | 17.59  | < |
| 15  | 15 | 2 | 413.44   | 219.89   | 37.38  | o |
| 16  | 15 | 2 | 12.28    | 2.20     | 28.59  | < |
| -15 | 16 | 2 | 181.04   | 105.55   | 39.58  | < |
| -14 | 16 | 2 | 1478.49  | 1306.16  | 63.77  | o |
| -13 | 16 | 2 | 324.35   | 340.83   | 30.78  | o |
| -12 | 16 | 2 | 5560.52  | 6077.82  | 208.90 | o |



## regerite.cif

|     |    |   |          |          |          |
|-----|----|---|----------|----------|----------|
| -11 | 16 | 2 | 1281.56  | 1130.25  | 63.77 o  |
| -10 | 16 | 2 | 5758.56  | 5459.93  | 213.30 o |
| -9  | 16 | 2 | 93.28    | 61.57    | 17.59 o  |
| -8  | 16 | 2 | 259.76   | 219.89   | 21.99 o  |
| -7  | 16 | 2 | 0.25     | 10.99    | 15.39 <  |
| -6  | 16 | 2 | 2195.11  | 2137.35  | 85.76 o  |
| -5  | 16 | 2 | 974.60   | 1110.46  | 59.37 o  |
| -4  | 16 | 2 | 3798.58  | 3918.48  | 140.73 o |
| -3  | 16 | 2 | 7.76     | 8.80     | 15.39 <  |
| -2  | 16 | 2 | 21931.70 | 23192.00 | 741.04 o |
| -1  | 16 | 2 | 9.86     | -39.58   | 28.59 <  |
| 0   | 16 | 2 | 1773.69  | 1902.07  | 90.16 o  |
| 1   | 16 | 2 | 448.95   | 430.99   | 37.38 o  |
| 2   | 16 | 2 | 7124.81  | 7533.51  | 292.46 o |
| 3   | 16 | 2 | 425.20   | 428.79   | 35.18 o  |
| 4   | 16 | 2 | 10532.60 | 10933.00 | 358.42 o |
| 5   | 16 | 2 | 27.16    | 6.60     | 24.19 <  |
| 6   | 16 | 2 | 1738.25  | 1803.12  | 74.76 o  |
| 7   | 16 | 2 | 360.87   | 404.60   | 28.59 o  |
| 8   | 16 | 2 | 4395.21  | 4413.24  | 156.12 o |
| 9   | 16 | 2 | 32.38    | 48.38    | 17.59 <  |
| 10  | 16 | 2 | 265.38   | 277.06   | 24.19 o  |
| 11  | 16 | 2 | 846.28   | 752.03   | 41.78 o  |
| 12  | 16 | 2 | 1981.93  | 1798.72  | 74.76 o  |
| 13  | 16 | 2 | 2.32     | 15.39    | 15.39 <  |
| 14  | 16 | 2 | 1459.98  | 1363.33  | 90.16 o  |
| 15  | 16 | 2 | 500.20   | 477.17   | 59.37 o  |
| -14 | 17 | 2 | 371.40   | 299.05   | 57.17 o  |
| -13 | 17 | 2 | 713.26   | 657.48   | 41.78 o  |
| -12 | 17 | 2 | 79.07    | 68.17    | 17.59 o  |
| -11 | 17 | 2 | 4828.02  | 5064.12  | 175.91 o |
| -10 | 17 | 2 | 1220.14  | 1235.80  | 65.97 o  |
| -9  | 17 | 2 | 3493.68  | 3500.69  | 125.34 o |
| -8  | 17 | 2 | 11.27    | 30.78    | 24.19 <  |
| -7  | 17 | 2 | 5009.29  | 5651.23  | 195.70 o |
| -6  | 17 | 2 | 327.20   | 347.43   | 26.39 o  |
| -5  | 17 | 2 | 9374.29  | 9816.00  | 325.44 o |
| -4  | 17 | 2 | 519.77   | 571.72   | 35.18 o  |
| -3  | 17 | 2 | 1879.11  | 1930.66  | 79.16 o  |
| -2  | 17 | 2 | 3.12     | 6.60     | 17.59 <  |
| -1  | 17 | 2 | 316.39   | 369.42   | 30.78 o  |
| 0   | 17 | 2 | 503.58   | 582.72   | 39.58 o  |
| 1   | 17 | 2 | 2188.24  | 1921.86  | 90.16 o  |
| 2   | 17 | 2 | 1004.67  | 963.13   | 57.17 o  |
| 3   | 17 | 2 | 7595.14  | 8327.32  | 294.66 o |
| 4   | 17 | 2 | 140.14   | 151.73   | 19.79 o  |
| 5   | 17 | 2 | 3347.43  | 3458.91  | 142.93 o |
| 6   | 17 | 2 | 1377.40  | 1372.13  | 61.57 o  |
| 7   | 17 | 2 | 442.44   | 413.40   | 37.38 o  |
| 8   | 17 | 2 | 84.86    | 32.98    | 19.79 <  |
| 9   | 17 | 2 | 911.28   | 1070.88  | 57.17 o  |
| 10  | 17 | 2 | 404.82   | 338.63   | 28.59 o  |
| 11  | 17 | 2 | 3.54     | 0.00     | 13.19 <  |
| 12  | 17 | 2 | 814.75   | 824.60   | 43.98 o  |

## regerite.cif

|     |    |   |         |         |          |
|-----|----|---|---------|---------|----------|
| 13  | 17 | 2 | 70.74   | 90.16   | 26.39 o  |
| 14  | 17 | 2 | 19.05   | -17.59  | 24.19 <  |
| -13 | 18 | 2 | 19.09   | 21.99   | 37.38 <  |
| -12 | 18 | 2 | 50.27   | 61.57   | 17.59 o  |
| -11 | 18 | 2 | 2771.83 | 2860.80 | 107.75 o |
| -10 | 18 | 2 | 160.85  | 147.33  | 19.79 o  |
| -9  | 18 | 2 | 414.59  | 358.42  | 30.78 o  |
| -8  | 18 | 2 | 483.58  | 422.19  | 37.38 o  |
| -7  | 18 | 2 | 57.70   | 61.57   | 15.39 o  |
| -6  | 18 | 2 | 3048.06 | 3184.04 | 118.74 o |
| -5  | 18 | 2 | 1363.95 | 1416.11 | 63.77 o  |
| -4  | 18 | 2 | 4584.25 | 4556.17 | 160.52 o |
| -3  | 18 | 2 | 104.94  | 123.14  | 19.79 o  |
| -2  | 18 | 2 | 7605.65 | 7847.96 | 266.07 o |
| -1  | 18 | 2 | 7.74    | -19.79  | 15.39 <  |
| 0   | 18 | 2 | 350.42  | 404.60  | 30.78 o  |
| 1   | 18 | 2 | 936.03  | 914.75  | 48.38 o  |
| 2   | 18 | 2 | 303.38  | 285.86  | 26.39 o  |
| 3   | 18 | 2 | 0.10    | -4.40   | 15.39 <  |
| 4   | 18 | 2 | 132.38  | 59.37   | 17.59 o  |
| 5   | 18 | 2 | 0.66    | 4.40    | 15.39 <  |
| 6   | 18 | 2 | 249.77  | 259.47  | 30.78 o  |
| 7   | 18 | 2 | 1814.43 | 2132.96 | 96.75 o  |
| 8   | 18 | 2 | 782.65  | 796.01  | 50.58 o  |
| 9   | 18 | 2 | 243.90  | 257.27  | 28.59 o  |
| 10  | 18 | 2 | 2918.10 | 2994.93 | 129.74 o |
| 11  | 18 | 2 | 170.15  | 123.14  | 19.79 o  |
| 12  | 18 | 2 | 59.64   | 52.77   | 19.79 <  |
| 13  | 18 | 2 | 1166.40 | 1314.96 | 87.96 o  |
| -12 | 19 | 2 | 955.90  | 697.06  | 79.16 o  |
| -11 | 19 | 2 | 1964.93 | 1783.33 | 92.35 o  |
| -10 | 19 | 2 | 770.84  | 708.05  | 39.58 o  |
| -9  | 19 | 2 | 1775.53 | 1844.90 | 74.76 o  |
| -8  | 19 | 2 | 220.89  | 217.69  | 24.19 o  |
| -7  | 19 | 2 | 463.95  | 378.21  | 30.78 o  |
| -6  | 19 | 2 | 507.47  | 492.56  | 39.58 o  |
| -5  | 19 | 2 | 43.03   | 30.78   | 15.39 <  |
| -4  | 19 | 2 | 257.18  | 239.68  | 28.59 o  |
| -3  | 19 | 2 | 3146.52 | 3201.63 | 138.53 o |
| -2  | 19 | 2 | 232.84  | 257.27  | 26.39 o  |
| -1  | 19 | 2 | 46.81   | 37.38   | 17.59 <  |
| 0   | 19 | 2 | 140.51  | 123.14  | 19.79 o  |
| 1   | 19 | 2 | 4.42    | 10.99   | 17.59 <  |
| 2   | 19 | 2 | 1517.08 | 1592.02 | 81.36 o  |
| 3   | 19 | 2 | 1563.50 | 1343.54 | 74.76 o  |
| 4   | 19 | 2 | 474.38  | 547.53  | 35.18 o  |
| 5   | 19 | 2 | 86.63   | 118.74  | 19.79 o  |
| 6   | 19 | 2 | 86.28   | 96.75   | 21.99 o  |
| 7   | 19 | 2 | 82.46   | 107.75  | 21.99 o  |
| 8   | 19 | 2 | 1.80    | 24.19   | 17.59 <  |
| 9   | 19 | 2 | 5120.92 | 5017.94 | 178.11 o |
| 10  | 19 | 2 | 538.96  | 527.74  | 41.78 o  |
| 11  | 19 | 2 | 1382.07 | 532.14  | 87.96 o  |
| 12  | 19 | 2 | 1709.30 | 1671.18 | 105.55 o |

## regerite.cif

|     |    |   |          |          |          |
|-----|----|---|----------|----------|----------|
| -11 | 20 | 2 | 24.33    | 61.57    | 32.98 <  |
| -10 | 20 | 2 | 6990.10  | 6917.81  | 303.45 o |
| -9  | 20 | 2 | 257.83   | 200.10   | 21.99 o  |
| -8  | 20 | 2 | 1707.62  | 1475.48  | 63.77 o  |
| -7  | 20 | 2 | 36.64    | 39.58    | 15.39 <  |
| -6  | 20 | 2 | 606.53   | 584.91   | 39.58 o  |
| -5  | 20 | 2 | 1.44     | 10.99    | 15.39 <  |
| -4  | 20 | 2 | 253.57   | 343.03   | 35.18 o  |
| -3  | 20 | 2 | 164.27   | 167.12   | 24.19 o  |
| -2  | 20 | 2 | 6959.81  | 6871.64  | 270.47 o |
| -1  | 20 | 2 | 257.58   | 252.88   | 30.78 o  |
| 0   | 20 | 2 | 7804.89  | 8914.44  | 343.03 o |
| 1   | 20 | 2 | 5.62     | 0.00     | 17.59 <  |
| 2   | 20 | 2 | 1068.81  | 1176.42  | 63.77 o  |
| 3   | 20 | 2 | 168.89   | 145.13   | 19.79 o  |
| 4   | 20 | 2 | 239.32   | 195.70   | 26.39 o  |
| 5   | 20 | 2 | 19.41    | 24.19    | 19.79 <  |
| 6   | 20 | 2 | 12551.10 | 13567.40 | 444.18 o |
| 7   | 20 | 2 | 582.27   | 488.16   | 37.38 o  |
| 8   | 20 | 2 | 16907.90 | 18330.20 | 587.11 o |
| 9   | 20 | 2 | 191.30   | 182.51   | 28.59 o  |
| 10  | 20 | 2 | 5316.78  | 5097.10  | 263.87 o |
| 11  | 20 | 2 | 170.03   | 200.10   | 41.78 o  |
| -9  | 21 | 2 | 2040.19  | 1772.33  | 160.52 o |
| -8  | 21 | 2 | 26.87    | 37.38    | 19.79 <  |
| -7  | 21 | 2 | 32.04    | 6.60     | 13.19 <  |
| -6  | 21 | 2 | 109.96   | 118.74   | 17.59 o  |
| -5  | 21 | 2 | 10.44    | 19.79    | 15.39 <  |
| -4  | 21 | 2 | 307.15   | 351.83   | 28.59 o  |
| -3  | 21 | 2 | 979.93   | 1266.58  | 65.97 o  |
| -2  | 21 | 2 | 900.75   | 877.37   | 48.38 o  |
| -1  | 21 | 2 | 4321.96  | 4217.54  | 153.93 o |
| 0   | 21 | 2 | 31.31    | 13.19    | 17.59 <  |
| 1   | 21 | 2 | 3247.71  | 3289.59  | 125.34 o |
| 2   | 21 | 2 | 167.31   | 195.70   | 21.99 o  |
| 3   | 21 | 2 | 6466.62  | 7214.67  | 279.26 o |
| 4   | 21 | 2 | 2105.24  | 2159.34  | 101.15 o |
| 5   | 21 | 2 | 1302.49  | 1222.60  | 59.37 o  |
| 6   | 21 | 2 | 1725.47  | 1688.77  | 72.56 o  |
| 7   | 21 | 2 | 251.43   | 246.28   | 30.78 o  |
| 8   | 21 | 2 | 270.15   | 268.27   | 32.98 o  |
| 9   | 21 | 2 | 1391.42  | 945.54   | 68.17 o  |
| 10  | 21 | 2 | 101.50   | 61.57    | 32.98 <  |
| -7  | 22 | 2 | 1012.96  | 1077.47  | 114.34 o |
| -6  | 22 | 2 | 822.48   | 606.90   | 43.98 o  |
| -5  | 22 | 2 | 523.72   | 573.92   | 41.78 o  |
| -4  | 22 | 2 | 1474.90  | 1416.11  | 65.97 o  |
| -3  | 22 | 2 | 102.35   | 105.55   | 19.79 o  |
| -2  | 22 | 2 | 9715.14  | 10403.10 | 345.23 o |
| -1  | 22 | 2 | 18.51    | 17.59    | 83.56 <  |
| 0   | 22 | 2 | 9556.07  | 10154.60 | 340.83 o |
| 1   | 22 | 2 | 971.04   | 1064.28  | 54.97 o  |
| 2   | 22 | 2 | 15809.90 | 17978.40 | 580.52 o |
| 3   | 22 | 2 | 39.35    | 30.78    | 76.96 <  |

## regerite.cif

|     |    |   |          |          |           |
|-----|----|---|----------|----------|-----------|
| 4   | 22 | 2 | 6109.43  | 6189.97  | 252.88 o  |
| 5   | 22 | 2 | 831.02   | 897.16   | 72.56 o   |
| 6   | 22 | 2 | 65.45    | 48.38    | 24.19 <   |
| 7   | 22 | 2 | 1.33     | 2.20     | 19.79 <   |
| 8   | 22 | 2 | 958.49   | 697.06   | 81.36 o   |
| -5  | 23 | 2 | 2449.09  | 2042.80  | 180.31 o  |
| -4  | 23 | 2 | 20.28    | 13.19    | 41.78 <   |
| -3  | 23 | 2 | 608.81   | 452.98   | 46.18 o   |
| -2  | 23 | 2 | 66.52    | 61.57    | 28.59 <   |
| -1  | 23 | 2 | 2090.39  | 1869.09  | 103.35 o  |
| 0   | 23 | 2 | 995.22   | 758.63   | 52.77 o   |
| 1   | 23 | 2 | 16.90    | 17.59    | 35.18 <   |
| 2   | 23 | 2 | 276.34   | 274.86   | 54.97 o   |
| 3   | 23 | 2 | 1531.23  | 1794.32  | 112.14 o  |
| 4   | 23 | 2 | 73.69    | 107.75   | 28.59 o   |
| 5   | 23 | 2 | 1369.57  | 855.38   | 92.35 o   |
| 6   | 23 | 2 | 72.79    | 59.37    | 35.18 <   |
| 0   | 24 | 2 | 7.66     | 17.59    | 32.98 <   |
| 1   | 24 | 2 | 98.83    | 39.58    | 35.18 <   |
| -20 | 1  | 3 | 401.09   | 263.87   | 24.19 o   |
| -19 | 1  | 3 | 657.14   | 595.91   | 32.98 o   |
| -18 | 1  | 3 | 35.29    | 32.98    | 10.99 <   |
| -17 | 1  | 3 | 178.68   | 167.12   | 17.59 o   |
| -16 | 1  | 3 | 3535.11  | 3681.00  | 127.54 o  |
| -15 | 1  | 3 | 62.77    | 79.16    | 13.19 o   |
| -14 | 1  | 3 | 27046.70 | 28535.40 | 1288.57 o |
| -13 | 1  | 3 | 4878.19  | 4624.34  | 215.49 o  |
| -12 | 1  | 3 | 48387.10 | 48827.10 | 1537.05 o |
| -11 | 1  | 3 | 1352.17  | 1233.60  | 48.38 o   |
| -10 | 1  | 3 | 2020.00  | 1957.04  | 70.37 o   |
| -9  | 1  | 3 | 55.22    | 17.59    | 10.99 <   |
| -8  | 1  | 3 | 112.62   | 101.15   | 17.59 o   |
| -7  | 1  | 3 | 1238.63  | 1064.28  | 48.38 o   |
| -6  | 1  | 3 | 364.25   | 338.63   | 19.79 o   |
| -5  | 1  | 3 | 163.00   | 189.11   | 13.19 o   |
| -4  | 1  | 3 | 16990.10 | 15977.40 | 507.95 o  |
| -3  | 1  | 3 | 1598.38  | 1101.66  | 39.58 o   |
| -2  | 1  | 3 | 222.17   | 167.12   | 8.80 o    |
| -1  | 1  | 3 | 130.04   | 142.93   | 10.99 o   |
| 0   | 1  | 3 | 17134.70 | 17360.50 | 771.82 o  |
| 1   | 1  | 3 | 988.77   | 710.25   | 28.59 o   |
| 2   | 1  | 3 | 186.62   | 224.29   | 10.99 o   |
| 3   | 1  | 3 | 566.68   | 327.64   | 13.19 o   |
| 4   | 1  | 3 | 12153.60 | 12518.50 | 395.81 o  |
| 5   | 1  | 3 | 1640.98  | 1614.01  | 54.97 o   |
| 6   | 1  | 3 | 10706.30 | 10728.50 | 340.83 o  |
| 7   | 1  | 3 | 660.95   | 481.56   | 26.39 o   |
| 8   | 1  | 3 | 2210.53  | 2445.20  | 96.75 o   |
| 9   | 1  | 3 | 509.14   | 413.40   | 21.99 o   |
| 10  | 1  | 3 | 13329.00 | 12529.50 | 400.20 o  |
| 11  | 1  | 3 | 14.19    | 19.79    | 8.80 <    |
| 12  | 1  | 3 | 1610.44  | 1684.38  | 63.77 o   |
| 13  | 1  | 3 | 11.13    | 13.19    | 10.99 <   |
| 14  | 1  | 3 | 3949.94  | 3969.06  | 193.51 o  |

## regerite.cif

|     |   |   |          |          |         |   |
|-----|---|---|----------|----------|---------|---|
| 15  | 1 | 3 | 1975.20  | 2091.18  | 76.96   | o |
| 16  | 1 | 3 | 2264.93  | 2515.57  | 90.16   | o |
| 17  | 1 | 3 | 3317.52  | 3410.53  | 138.53  | o |
| 18  | 1 | 3 | 180.30   | 173.71   | 17.59   | o |
| 19  | 1 | 3 | 477.67   | 349.63   | 24.19   | o |
| 20  | 1 | 3 | 4.53     | 17.59    | 13.19   | < |
| -20 | 2 | 3 | 41.40    | 32.98    | 13.19   | < |
| -19 | 2 | 3 | 232.83   | 180.31   | 17.59   | o |
| -18 | 2 | 3 | 660.87   | 604.70   | 32.98   | o |
| -17 | 2 | 3 | 3198.62  | 3124.67  | 129.74  | o |
| -16 | 2 | 3 | 246.84   | 248.48   | 19.79   | o |
| -15 | 2 | 3 | 1848.53  | 1592.02  | 61.57   | o |
| -14 | 2 | 3 | 6474.46  | 6717.71  | 259.47  | o |
| -13 | 2 | 3 | 5092.38  | 5149.88  | 200.10  | o |
| -12 | 2 | 3 | 2040.32  | 2168.14  | 79.16   | o |
| -11 | 2 | 3 | 515.70   | 406.80   | 24.19   | o |
| -10 | 2 | 3 | 4641.02  | 4683.71  | 156.12  | o |
| -9  | 2 | 3 | 34.35    | 57.17    | 10.99   | o |
| -8  | 2 | 3 | 5438.94  | 5154.28  | 241.88  | o |
| -7  | 2 | 3 | 10798.10 | 10880.30 | 349.63  | o |
| -6  | 2 | 3 | 2913.93  | 2981.74  | 112.14  | o |
| -5  | 2 | 3 | 1997.54  | 3351.16  | 109.95  | o |
| -4  | 2 | 3 | 881.32   | 710.25   | 28.59   | o |
| -3  | 2 | 3 | 92042.10 | 83578.90 | 2808.03 | o |
| -2  | 2 | 3 | 1161.81  | 861.98   | 32.98   | o |
| -1  | 2 | 3 | 83763.30 | 79979.30 | 2513.37 | o |
| 0   | 2 | 3 | 173.83   | 204.50   | 17.59   | o |
| 1   | 2 | 3 | 2056.98  | 1882.28  | 72.56   | o |
| 2   | 2 | 3 | 1.23     | 4.40     | 6.60    | < |
| 3   | 2 | 3 | 673.39   | 743.24   | 28.59   | o |
| 4   | 2 | 3 | 8.47     | 48.38    | 6.60    | o |
| 5   | 2 | 3 | 26433.30 | 25443.70 | 800.41  | o |
| 6   | 2 | 3 | 8064.77  | 7500.53  | 239.68  | o |
| 7   | 2 | 3 | 3128.83  | 3285.19  | 125.34  | o |
| 8   | 2 | 3 | 5381.20  | 5281.81  | 200.10  | o |
| 9   | 2 | 3 | 111.82   | 114.34   | 13.19   | o |
| 10  | 2 | 3 | 5065.85  | 5235.64  | 171.52  | o |
| 11  | 2 | 3 | 3967.56  | 3826.13  | 127.54  | o |
| 12  | 2 | 3 | 2462.16  | 2616.72  | 92.35   | o |
| 13  | 2 | 3 | 500.35   | 547.53   | 30.78   | o |
| 14  | 2 | 3 | 381.02   | 450.78   | 30.78   | o |
| 15  | 2 | 3 | 6928.28  | 7401.58  | 244.08  | o |
| 16  | 2 | 3 | 462.74   | 441.98   | 26.39   | o |
| 17  | 2 | 3 | 6188.02  | 6620.96  | 252.88  | o |
| 18  | 2 | 3 | 8.92     | 6.60     | 10.99   | < |
| 19  | 2 | 3 | 3744.77  | 3597.44  | 127.54  | o |
| 20  | 2 | 3 | 418.77   | 255.07   | 30.78   | o |
| -20 | 3 | 3 | 838.21   | 782.82   | 48.38   | o |
| -19 | 3 | 3 | 1911.80  | 1937.25  | 74.76   | o |
| -18 | 3 | 3 | 388.47   | 384.81   | 24.19   | o |
| -17 | 3 | 3 | 4051.41  | 4327.48  | 204.50  | o |
| -16 | 3 | 3 | 151.20   | 169.32   | 17.59   | o |
| -15 | 3 | 3 | 3288.16  | 3428.12  | 118.74  | o |
| -14 | 3 | 3 | 113.29   | 149.53   | 19.79   | o |

## regerite.cif

|     |   |   |           |           |         |   |
|-----|---|---|-----------|-----------|---------|---|
| -13 | 3 | 3 | 344.94    | 332.04    | 24.19   | o |
| -12 | 3 | 3 | 2126.00   | 2174.74   | 79.16   | o |
| -11 | 3 | 3 | 1255.62   | 1209.41   | 50.58   | o |
| -10 | 3 | 3 | 19161.00  | 19051.50  | 604.70  | o |
| -9  | 3 | 3 | 503.88    | 532.14    | 26.39   | o |
| -8  | 3 | 3 | 59205.30  | 63324.60  | 2319.86 | o |
| -7  | 3 | 3 | 2367.69   | 2539.76   | 85.76   | o |
| -6  | 3 | 3 | 30349.80  | 35369.70  | 1286.37 | o |
| -5  | 3 | 3 | 112.31    | 17.59     | 8.80    | < |
| -4  | 3 | 3 | 6534.59   | 4006.44   | 129.74  | o |
| -3  | 3 | 3 | 6.11      | 4.40      | 6.60    | < |
| -2  | 3 | 3 | 21439.20  | 18405.00  | 582.72  | o |
| -1  | 3 | 3 | 512.45    | 376.02    | 19.79   | o |
| 0   | 3 | 3 | 41960.70  | 36689.00  | 1158.83 | o |
| 1   | 3 | 3 | 49.36     | 37.38     | 8.80    | o |
| 2   | 3 | 3 | 1372.65   | 2330.86   | 76.96   | o |
| 3   | 3 | 3 | 1786.32   | 1440.30   | 48.38   | o |
| 4   | 3 | 3 | 29139.80  | 25896.70  | 815.80  | o |
| 5   | 3 | 3 | 146.96    | 92.35     | 13.19   | o |
| 6   | 3 | 3 | 168591.00 | 164710.00 | 5965.68 | o |
| 7   | 3 | 3 | 29.85     | 39.58     | 10.99   | o |
| 8   | 3 | 3 | 51286.50  | 51428.40  | 1618.41 | o |
| 9   | 3 | 3 | 566.97    | 637.69    | 28.59   | o |
| 10  | 3 | 3 | 9825.19   | 10159.00  | 327.64  | o |
| 11  | 3 | 3 | 214.03    | 263.87    | 19.79   | o |
| 12  | 3 | 3 | 2506.06   | 2528.76   | 90.16   | o |
| 13  | 3 | 3 | 3733.01   | 3938.27   | 153.93  | o |
| 14  | 3 | 3 | 6503.77   | 7654.45   | 292.46  | o |
| 15  | 3 | 3 | 4093.03   | 4575.96   | 153.93  | o |
| 16  | 3 | 3 | 3834.65   | 4254.92   | 145.13  | o |
| 17  | 3 | 3 | 6940.89   | 7643.46   | 268.27  | o |
| 18  | 3 | 3 | 4.57      | 15.39     | 10.99   | < |
| 19  | 3 | 3 | 1589.67   | 1649.19   | 136.33  | o |
| 20  | 3 | 3 | 302.53    | 266.07    | 37.38   | o |
| -20 | 4 | 3 | 1064.89   | 839.99    | 54.97   | o |
| -19 | 4 | 3 | 804.86    | 745.43    | 37.38   | o |
| -18 | 4 | 3 | 699.09    | 690.46    | 35.18   | o |
| -17 | 4 | 3 | 657.96    | 655.28    | 39.58   | o |
| -16 | 4 | 3 | 832.49    | 787.22    | 37.38   | o |
| -15 | 4 | 3 | 1205.86   | 1323.75   | 54.97   | o |
| -14 | 4 | 3 | 776.98    | 837.79    | 39.58   | o |
| -13 | 4 | 3 | 852.93    | 818.00    | 37.38   | o |
| -12 | 4 | 3 | 647.03    | 642.09    | 32.98   | o |
| -11 | 4 | 3 | 10546.10  | 10702.20  | 345.23  | o |
| -10 | 4 | 3 | 5636.16   | 6033.85   | 197.90  | o |
| -9  | 4 | 3 | 8619.66   | 9895.16   | 321.04  | o |
| -8  | 4 | 3 | 2176.43   | 2588.13   | 103.35  | o |
| -7  | 4 | 3 | 9.45      | 41.78     | 10.99   | o |
| -6  | 4 | 3 | 4.37      | 10.99     | 8.80    | < |
| -5  | 4 | 3 | 1737.54   | 936.74    | 41.78   | o |
| -4  | 4 | 3 | 14.16     | 19.79     | 8.80    | < |
| -3  | 4 | 3 | 49927.50  | 49587.90  | 1554.64 | o |
| -2  | 4 | 3 | 568.55    | 446.38    | 19.79   | o |
| -1  | 4 | 3 | 35348.20  | 30908.10  | 974.12  | o |

## regerite.cif

|     |   |   |           |           |           |
|-----|---|---|-----------|-----------|-----------|
| 0   | 4 | 3 | 9.70      | 2.20      | 10.99 <   |
| 1   | 4 | 3 | 132286.00 | 114254.00 | 3586.44 o |
| 2   | 4 | 3 | 382.86    | 237.48    | 13.19 o   |
| 3   | 4 | 3 | 18909.10  | 15564.00  | 494.76 o  |
| 4   | 4 | 3 | 1123.10   | 1103.86   | 41.78 o   |
| 5   | 4 | 3 | 5271.23   | 5435.74   | 202.30 o  |
| 6   | 4 | 3 | 622.72    | 675.07    | 28.59 o   |
| 7   | 4 | 3 | 73.18     | 79.16     | 17.59 o   |
| 8   | 4 | 3 | 5539.35   | 5277.42   | 182.51 o  |
| 9   | 4 | 3 | 12499.00  | 12690.00  | 402.40 o  |
| 10  | 4 | 3 | 3673.27   | 3667.80   | 125.34 o  |
| 11  | 4 | 3 | 17909.80  | 17888.20  | 567.32 o  |
| 12  | 4 | 3 | 2900.55   | 3054.30   | 114.34 o  |
| 13  | 4 | 3 | 3566.18   | 3681.00   | 145.13 o  |
| 14  | 4 | 3 | 1284.34   | 1413.91   | 68.17 o   |
| 15  | 4 | 3 | 1534.28   | 1594.22   | 63.77 o   |
| 16  | 4 | 3 | 88.06     | 94.55     | 15.39 o   |
| 17  | 4 | 3 | 880.09    | 892.76    | 46.18 o   |
| 18  | 4 | 3 | 24.14     | 79.16     | 15.39 o   |
| 19  | 4 | 3 | 1055.96   | 1013.70   | 48.38 o   |
| 20  | 4 | 3 | 799.34    | 569.52    | 59.37 o   |
| -19 | 5 | 3 | 4957.24   | 5369.77   | 184.71 o  |
| -18 | 5 | 3 | 1160.88   | 1114.85   | 50.58 o   |
| -17 | 5 | 3 | 1697.71   | 1743.75   | 70.37 o   |
| -16 | 5 | 3 | 415.50    | 422.19    | 26.39 o   |
| -15 | 5 | 3 | 235.24    | 202.30    | 19.79 o   |
| -14 | 5 | 3 | 6246.85   | 6462.64   | 215.49 o  |
| -13 | 5 | 3 | 24.84     | 19.79     | 15.39 <   |
| -12 | 5 | 3 | 3949.46   | 4351.67   | 169.32 o  |
| -11 | 5 | 3 | 6737.33   | 7199.28   | 235.29 o  |
| -10 | 5 | 3 | 12011.80  | 14044.50  | 448.58 o  |
| -9  | 5 | 3 | 1289.71   | 1572.23   | 59.37 o   |
| -8  | 5 | 3 | 12406.80  | 13327.70  | 428.79 o  |
| -7  | 5 | 3 | 385.48    | 389.21    | 21.99 o   |
| -6  | 5 | 3 | 4.98      | 21.99     | 10.99 <   |
| -5  | 5 | 3 | 547.37    | 536.54    | 24.19 o   |
| -4  | 5 | 3 | 73292.00  | 79985.90  | 2911.37 o |
| -3  | 5 | 3 | 806.61    | 703.66    | 30.78 o   |
| -2  | 5 | 3 | 13685.00  | 13325.50  | 426.59 o  |
| -1  | 5 | 3 | 753.27    | 664.08    | 28.59 o   |
| 0   | 5 | 3 | 8934.94   | 8494.44   | 270.47 o  |
| 1   | 5 | 3 | 2423.11   | 2062.59   | 72.56 o   |
| 2   | 5 | 3 | 203.75    | 61.57     | 10.99 o   |
| 3   | 5 | 3 | 2139.52   | 2040.60   | 70.37 o   |
| 4   | 5 | 3 | 9618.13   | 9334.43   | 340.83 o  |
| 5   | 5 | 3 | 149.16    | 129.74    | 10.99 o   |
| 6   | 5 | 3 | 319.07    | 523.34    | 24.19 o   |
| 7   | 5 | 3 | 15.21     | 26.39     | 10.99 <   |
| 8   | 5 | 3 | 0.70      | 8.80      | 13.19 <   |
| 9   | 5 | 3 | 96.78     | 90.16     | 13.19 o   |
| 10  | 5 | 3 | 18449.80  | 18416.00  | 584.91 o  |
| 11  | 5 | 3 | 293.80    | 305.65    | 19.79 o   |
| 12  | 5 | 3 | 21189.70  | 21679.20  | 793.81 o  |
| 13  | 5 | 3 | 345.98    | 369.42    | 30.78 o   |

## regerite.cif

|     |   |   |          |          |           |
|-----|---|---|----------|----------|-----------|
| 14  | 5 | 3 | 11337.70 | 11902.80 | 384.81 o  |
| 15  | 5 | 3 | 720.52   | 655.28   | 35.18 o   |
| 16  | 5 | 3 | 1989.95  | 2152.75  | 81.36 o   |
| 17  | 5 | 3 | 808.05   | 941.14   | 59.37 o   |
| 18  | 5 | 3 | 192.23   | 189.11   | 19.79 o   |
| 19  | 5 | 3 | 52.29    | 35.18    | 15.39 <   |
| -19 | 6 | 3 | 5512.07  | 5519.30  | 189.11 o  |
| -18 | 6 | 3 | 158.73   | 169.32   | 21.99 o   |
| -17 | 6 | 3 | 8517.35  | 9398.20  | 358.42 o  |
| -16 | 6 | 3 | 60.36    | 48.38    | 13.19 o   |
| -15 | 6 | 3 | 2288.68  | 2143.95  | 81.36 o   |
| -14 | 6 | 3 | 1047.60  | 1057.68  | 48.38 o   |
| -13 | 6 | 3 | 4013.00  | 4085.60  | 162.72 o  |
| -12 | 6 | 3 | 29.27    | 19.79    | 13.19 <   |
| -11 | 6 | 3 | 14979.50 | 16324.80 | 558.53 o  |
| -10 | 6 | 3 | 291.81   | 413.40   | 24.19 o   |
| -9  | 6 | 3 | 20694.80 | 23678.00 | 754.23 o  |
| -8  | 6 | 3 | 3029.52  | 2852.00  | 98.95 o   |
| -7  | 6 | 3 | 15121.40 | 17617.80 | 650.88 o  |
| -6  | 6 | 3 | 33.74    | 10.99    | 8.80 <    |
| -5  | 6 | 3 | 2613.43  | 2643.11  | 90.16 o   |
| -4  | 6 | 3 | 14.53    | -21.99   | 8.80 <    |
| -3  | 6 | 3 | 140.45   | 171.52   | 15.39 o   |
| -2  | 6 | 3 | 504.50   | 463.97   | 24.19 o   |
| -1  | 6 | 3 | 46794.50 | 45955.30 | 1446.89 o |
| 0   | 6 | 3 | 1031.36  | 908.16   | 35.18 o   |
| 1   | 6 | 3 | 3831.05  | 4872.81  | 158.32 o  |
| 2   | 6 | 3 | 960.97   | 813.60   | 32.98 o   |
| 3   | 6 | 3 | 2856.75  | 3469.90  | 134.13 o  |
| 4   | 6 | 3 | 232.14   | 244.08   | 17.59 o   |
| 5   | 6 | 3 | 9264.95  | 8716.53  | 279.26 o  |
| 6   | 6 | 3 | 33.32    | 15.39    | 8.80 <    |
| 7   | 6 | 3 | 6221.11  | 6280.13  | 204.50 o  |
| 8   | 6 | 3 | 70.03    | 61.57    | 10.99 o   |
| 9   | 6 | 3 | 17392.30 | 18464.40 | 587.11 o  |
| 10  | 6 | 3 | 480.23   | 457.38   | 26.39 o   |
| 11  | 6 | 3 | 2707.82  | 2772.84  | 98.95 o   |
| 12  | 6 | 3 | 4078.59  | 4318.69  | 147.33 o  |
| 13  | 6 | 3 | 1199.10  | 1273.18  | 52.77 o   |
| 14  | 6 | 3 | 122.08   | 90.16    | 17.59 o   |
| 15  | 6 | 3 | 2363.01  | 2662.90  | 96.75 o   |
| 16  | 6 | 3 | 31.82    | 32.98    | 15.39 <   |
| 17  | 6 | 3 | 1021.31  | 850.98   | 41.78 o   |
| 18  | 6 | 3 | 603.77   | 642.09   | 35.18 o   |
| 19  | 6 | 3 | 1651.00  | 1493.07  | 83.56 o   |
| -19 | 7 | 3 | 12.34    | 19.79    | 83.56 <   |
| -18 | 7 | 3 | 553.78   | 510.15   | 30.78 o   |
| -17 | 7 | 3 | 39.95    | 35.18    | 15.39 <   |
| -16 | 7 | 3 | 96.60    | 105.55   | 19.79 o   |
| -15 | 7 | 3 | 1068.33  | 1147.84  | 50.58 o   |
| -14 | 7 | 3 | 1.68     | 0.00     | 15.39 <   |
| -13 | 7 | 3 | 273.37   | 358.42   | 30.78 o   |
| -12 | 7 | 3 | 75.26    | 90.16    | 17.59 o   |
| -11 | 7 | 3 | 483.67   | 532.14   | 32.98 o   |



## regerite.cif

|     |   |   |          |          |           |
|-----|---|---|----------|----------|-----------|
| -10 | 7 | 3 | 203.60   | 244.08   | 19.79 o   |
| -9  | 7 | 3 | 7.32     | 21.99    | 10.99 <   |
| -8  | 7 | 3 | 3.99     | 15.39    | 10.99 <   |
| -7  | 7 | 3 | 115.13   | 158.32   | 15.39 o   |
| -6  | 7 | 3 | 1174.31  | 1292.97  | 50.58 o   |
| -5  | 7 | 3 | 0.46     | 6.60     | 10.99 <   |
| -4  | 7 | 3 | 2366.78  | 2425.41  | 96.75 o   |
| -3  | 7 | 3 | 957.39   | 820.20   | 35.18 o   |
| -2  | 7 | 3 | 1178.88  | 1020.30  | 41.78 o   |
| -1  | 7 | 3 | 149.23   | 120.94   | 15.39 o   |
| 0   | 7 | 3 | 2701.17  | 2132.96  | 87.96 o   |
| 1   | 7 | 3 | 152.38   | 103.35   | 13.19 o   |
| 2   | 7 | 3 | 14040.40 | 14866.90 | 472.77 o  |
| 3   | 7 | 3 | 1336.16  | 1435.90  | 52.77 o   |
| 4   | 7 | 3 | 1727.35  | 1778.93  | 74.76 o   |
| 5   | 7 | 3 | 1719.17  | 1627.20  | 70.37 o   |
| 6   | 7 | 3 | 2433.98  | 2616.72  | 92.35 o   |
| 7   | 7 | 3 | 1897.05  | 1697.57  | 74.76 o   |
| 8   | 7 | 3 | 34.71    | 54.97    | 13.19 o   |
| 9   | 7 | 3 | 1661.92  | 1754.74  | 63.77 o   |
| 10  | 7 | 3 | 124.99   | 107.75   | 15.39 o   |
| 11  | 7 | 3 | 135.27   | 79.16    | 19.79 o   |
| 12  | 7 | 3 | 347.91   | 384.81   | 28.59 o   |
| 13  | 7 | 3 | 672.96   | 712.45   | 37.38 o   |
| 14  | 7 | 3 | 2629.13  | 2852.00  | 103.35 o  |
| 15  | 7 | 3 | 7.73     | 32.98    | 15.39 <   |
| 16  | 7 | 3 | 26.41    | 30.78    | 15.39 <   |
| 17  | 7 | 3 | 656.86   | 668.47   | 35.18 o   |
| 18  | 7 | 3 | 192.82   | 217.69   | 21.99 o   |
| 19  | 7 | 3 | 389.94   | 345.23   | 37.38 o   |
| -19 | 8 | 3 | 8136.10  | 8364.71  | 393.61 o  |
| -18 | 8 | 3 | 85.37    | 90.16    | 15.39 o   |
| -17 | 8 | 3 | 7626.71  | 8954.02  | 294.66 o  |
| -16 | 8 | 3 | 6.17     | 17.59    | 17.59 <   |
| -15 | 8 | 3 | 4629.37  | 5517.10  | 186.91 o  |
| -14 | 8 | 3 | 0.16     | 10.99    | 15.39 <   |
| -13 | 8 | 3 | 4942.60  | 5921.70  | 197.90 o  |
| -12 | 8 | 3 | 1176.03  | 1314.96  | 54.97 o   |
| -11 | 8 | 3 | 2294.58  | 2924.57  | 105.55 o  |
| -10 | 8 | 3 | 1476.35  | 1787.72  | 68.17 o   |
| -9  | 8 | 3 | 10525.60 | 12439.30 | 404.60 o  |
| -8  | 8 | 3 | 2047.72  | 2194.53  | 81.36 o   |
| -7  | 8 | 3 | 48420.30 | 53570.20 | 1693.17 o |
| -6  | 8 | 3 | 2896.85  | 2805.83  | 114.34 o  |
| -5  | 8 | 3 | 742.87   | 767.42   | 35.18 o   |
| -4  | 8 | 3 | 67.77    | 76.96    | 13.19 o   |
| -3  | 8 | 3 | 418.93   | 527.74   | 30.78 o   |
| -2  | 8 | 3 | 6.40     | 0.00     | 10.99 <   |
| -1  | 8 | 3 | 14373.50 | 14526.10 | 463.97 o  |
| 0   | 8 | 3 | 96.79    | 52.77    | 13.19 o   |
| 1   | 8 | 3 | 13617.70 | 14097.30 | 452.98 o  |
| 2   | 8 | 3 | 107.88   | 76.96    | 13.19 o   |
| 3   | 8 | 3 | 497.56   | 490.36   | 28.59 o   |
| 4   | 8 | 3 | 395.67   | 384.81   | 26.39 o   |

## regerite.cif

|     |    |   |          |          |         |   |
|-----|----|---|----------|----------|---------|---|
| 5   | 8  | 3 | 49639.40 | 49563.70 | 1556.84 | o |
| 6   | 8  | 3 | 931.43   | 802.61   | 37.38   | o |
| 7   | 8  | 3 | 430.54   | 354.03   | 24.19   | o |
| 8   | 8  | 3 | 216.10   | 237.48   | 19.79   | o |
| 9   | 8  | 3 | 703.41   | 677.27   | 35.18   | o |
| 10  | 8  | 3 | 2000.08  | 1983.43  | 90.16   | o |
| 11  | 8  | 3 | 4964.74  | 5332.39  | 193.51  | o |
| 12  | 8  | 3 | 390.04   | 448.58   | 32.98   | o |
| 13  | 8  | 3 | 2150.51  | 2528.76  | 109.95  | o |
| 14  | 8  | 3 | 1871.36  | 1891.07  | 74.76   | o |
| 15  | 8  | 3 | 518.68   | 492.56   | 35.18   | o |
| 16  | 8  | 3 | 22.48    | 41.78    | 19.79   | < |
| 17  | 8  | 3 | 181.22   | 151.73   | 19.79   | o |
| 18  | 8  | 3 | 19.66    | 26.39    | 19.79   | < |
| 19  | 8  | 3 | 5039.17  | 4855.22  | 323.24  | o |
| -18 | 9  | 3 | 8.79     | 13.19    | 15.39   | < |
| -17 | 9  | 3 | 1607.10  | 1807.52  | 72.56   | o |
| -16 | 9  | 3 | 1218.92  | 1235.80  | 54.97   | o |
| -15 | 9  | 3 | 2812.59  | 3080.69  | 125.34  | o |
| -14 | 9  | 3 | 33.42    | 92.35    | 17.59   | o |
| -13 | 9  | 3 | 128.47   | 180.31   | 19.79   | o |
| -12 | 9  | 3 | 11626.00 | 13690.50 | 512.35  | o |
| -11 | 9  | 3 | 382.53   | 362.82   | 39.58   | o |
| -10 | 9  | 3 | 28540.90 | 35736.90 | 1312.76 | o |
| -9  | 9  | 3 | 896.89   | 1033.49  | 46.18   | o |
| -8  | 9  | 3 | 22757.40 | 24577.40 | 780.62  | o |
| -7  | 9  | 3 | 4547.85  | 4749.68  | 160.52  | o |
| -6  | 9  | 3 | 58160.10 | 56103.30 | 1770.13 | o |
| -5  | 9  | 3 | 67.92    | 101.15   | 17.59   | o |
| -4  | 9  | 3 | 241.85   | 206.70   | 17.59   | o |
| -3  | 9  | 3 | 2817.30  | 2372.64  | 85.76   | o |
| -2  | 9  | 3 | 19757.30 | 20757.80 | 765.22  | o |
| -1  | 9  | 3 | 531.34   | 567.32   | 35.18   | o |
| 0   | 9  | 3 | 1360.43  | 971.92   | 41.78   | o |
| 1   | 9  | 3 | 2586.05  | 2293.48  | 83.56   | o |
| 2   | 9  | 3 | 30092.80 | 28245.20 | 1037.89 | o |
| 3   | 9  | 3 | 757.06   | 736.64   | 39.58   | o |
| 4   | 9  | 3 | 36037.30 | 33760.10 | 1066.48 | o |
| 5   | 9  | 3 | 2082.30  | 2269.29  | 94.55   | o |
| 6   | 9  | 3 | 55.68    | 118.74   | 19.79   | o |
| 7   | 9  | 3 | 217.99   | 217.69   | 19.79   | o |
| 8   | 9  | 3 | 953.31   | 875.17   | 43.98   | o |
| 9   | 9  | 3 | 674.86   | 688.26   | 35.18   | o |
| 10  | 9  | 3 | 20803.80 | 22602.70 | 716.85  | o |
| 11  | 9  | 3 | 77.02    | 79.16    | 17.59   | o |
| 12  | 9  | 3 | 7.76     | 52.77    | 15.39   | o |
| 13  | 9  | 3 | 2057.59  | 2273.69  | 85.76   | o |
| 14  | 9  | 3 | 6410.05  | 7102.52  | 237.48  | o |
| 15  | 9  | 3 | 2834.39  | 3573.25  | 127.54  | o |
| 16  | 9  | 3 | 1346.53  | 1416.11  | 239.68  | o |
| 17  | 9  | 3 | 707.08   | 633.29   | 41.78   | o |
| 18  | 9  | 3 | 13.48    | 35.18    | 17.59   | < |
| 19  | 9  | 3 | 1320.95  | 954.33   | 109.95  | o |
| -18 | 10 | 3 | 654.21   | 527.74   | 37.38   | o |

## regerite.cif

|     |    |   |           |           |         |   |
|-----|----|---|-----------|-----------|---------|---|
| -17 | 10 | 3 | 2302.27   | 2581.54   | 109.95  | o |
| -16 | 10 | 3 | 2454.78   | 2821.22   | 105.55  | o |
| -15 | 10 | 3 | 2475.54   | 2878.39   | 125.34  | o |
| -14 | 10 | 3 | 521.82    | 615.70    | 35.18   | o |
| -13 | 10 | 3 | 325.11    | 347.43    | 26.39   | o |
| -12 | 10 | 3 | 4697.22   | 6163.58   | 206.70  | o |
| -11 | 10 | 3 | 6145.31   | 7731.42   | 255.07  | o |
| -10 | 10 | 3 | 4171.56   | 4956.37   | 167.12  | o |
| -9  | 10 | 3 | 7324.56   | 8316.33   | 314.45  | o |
| -8  | 10 | 3 | 2193.82   | 2190.13   | 83.56   | o |
| -7  | 10 | 3 | 1807.99   | 1739.35   | 68.17   | o |
| -6  | 10 | 3 | 3623.06   | 3498.49   | 123.14  | o |
| -5  | 10 | 3 | 13708.40  | 13747.70  | 441.98  | o |
| -4  | 10 | 3 | 222.05    | 277.06    | 21.99   | o |
| -3  | 10 | 3 | 47187.00  | 46118.00  | 1677.78 | o |
| -2  | 10 | 3 | 6.46      | 8.80      | 10.99   | < |
| -1  | 10 | 3 | 184955.00 | 198086.00 | 6244.94 | o |
| 0   | 10 | 3 | 61.64     | 61.57     | 13.19   | o |
| 1   | 10 | 3 | 85869.80  | 86331.90  | 2722.27 | o |
| 2   | 10 | 3 | 224.16    | 193.51    | 17.59   | o |
| 3   | 10 | 3 | 28734.00  | 27049.00  | 859.78  | o |
| 4   | 10 | 3 | 3179.45   | 3146.66   | 127.54  | o |
| 5   | 10 | 3 | 860.75    | 1026.90   | 43.98   | o |
| 6   | 10 | 3 | 1326.91   | 1284.17   | 54.97   | o |
| 7   | 10 | 3 | 3419.06   | 3425.92   | 118.74  | o |
| 8   | 10 | 3 | 1819.57   | 1893.27   | 72.56   | o |
| 9   | 10 | 3 | 5806.95   | 6176.78   | 204.50  | o |
| 10  | 10 | 3 | 12458.60  | 13925.80  | 516.75  | o |
| 11  | 10 | 3 | 739.91    | 738.84    | 41.78   | o |
| 12  | 10 | 3 | 2.11      | 2.20      | 15.39   | < |
| 13  | 10 | 3 | 14359.40  | 16162.10  | 521.15  | o |
| 14  | 10 | 3 | 1709.09   | 1695.37   | 83.56   | o |
| 15  | 10 | 3 | 1077.22   | 1073.07   | 57.17   | o |
| 16  | 10 | 3 | 465.39    | 409.00    | 28.59   | o |
| 17  | 10 | 3 | 114.08    | 116.54    | 19.79   | o |
| 18  | 10 | 3 | 22.36     | 24.19     | 19.79   | < |
| -18 | 11 | 3 | 429.68    | 345.23    | 54.97   | o |
| -17 | 11 | 3 | 1.32      | -2.20     | 21.99   | < |
| -16 | 11 | 3 | 3652.33   | 4353.87   | 167.12  | o |
| -15 | 11 | 3 | 2335.88   | 3151.06   | 129.74  | o |
| -14 | 11 | 3 | 25.18     | 39.58     | 17.59   | < |
| -13 | 11 | 3 | 901.56    | 1187.42   | 65.97   | o |
| -12 | 11 | 3 | 1034.77   | 1178.62   | 52.77   | o |
| -11 | 11 | 3 | 21.97     | 32.98     | 65.97   | < |
| -10 | 11 | 3 | 15992.10  | 18787.60  | 602.51  | o |
| -9  | 11 | 3 | 166.09    | 178.11    | 19.79   | o |
| -8  | 11 | 3 | 75.57     | 87.96     | 15.39   | o |
| -7  | 11 | 3 | 1611.94   | 1666.78   | 65.97   | o |
| -6  | 11 | 3 | 10926.50  | 10732.90  | 347.43  | o |
| -5  | 11 | 3 | 232.69    | 202.30    | 19.79   | o |
| -4  | 11 | 3 | 117.48    | 63.77     | 13.19   | o |
| -3  | 11 | 3 | 207.09    | 224.29    | 19.79   | o |
| -2  | 11 | 3 | 1464.09   | 1464.48   | 59.37   | o |
| -1  | 11 | 3 | 55.80     | 28.59     | 13.19   | < |

## regerite.cif

|     |    |   |          |          |         |   |
|-----|----|---|----------|----------|---------|---|
| 0   | 11 | 3 | 307.78   | 369.42   | 28.59   | o |
| 1   | 11 | 3 | 29.81    | 72.56    | 17.59   | o |
| 2   | 11 | 3 | 1509.39  | 1607.41  | 72.56   | o |
| 3   | 11 | 3 | 534.43   | 554.13   | 30.78   | o |
| 4   | 11 | 3 | 32217.60 | 32854.10 | 1040.09 | o |
| 5   | 11 | 3 | 9.72     | 17.59    | 10.99   | < |
| 6   | 11 | 3 | 25072.10 | 25296.40 | 800.41  | o |
| 7   | 11 | 3 | 1321.10  | 1222.60  | 52.77   | o |
| 8   | 11 | 3 | 30085.10 | 32643.00 | 1029.10 | o |
| 9   | 11 | 3 | 4.04     | 50.58    | 17.59   | < |
| 10  | 11 | 3 | 11440.50 | 12193.00 | 422.19  | o |
| 11  | 11 | 3 | 1791.40  | 1840.50  | 72.56   | o |
| 12  | 11 | 3 | 279.56   | 244.08   | 26.39   | o |
| 13  | 11 | 3 | 2299.92  | 2700.28  | 101.15  | o |
| 14  | 11 | 3 | 183.58   | 189.11   | 24.19   | o |
| 15  | 11 | 3 | 861.27   | 857.58   | 46.18   | o |
| 16  | 11 | 3 | 558.05   | 617.90   | 41.78   | o |
| 17  | 11 | 3 | 1019.49  | 833.39   | 52.77   | o |
| 18  | 11 | 3 | 83.40    | 28.59    | 17.59   | < |
| -17 | 12 | 3 | 39.20    | 52.77    | 21.99   | < |
| -16 | 12 | 3 | 575.34   | 633.29   | 41.78   | o |
| -15 | 12 | 3 | 3004.27  | 3793.14  | 158.32  | o |
| -14 | 12 | 3 | 1223.85  | 1413.91  | 90.16   | o |
| -13 | 12 | 3 | 1704.49  | 2012.02  | 83.56   | o |
| -12 | 12 | 3 | 1374.71  | 1490.87  | 61.57   | o |
| -11 | 12 | 3 | 7587.72  | 8621.98  | 283.66  | o |
| -10 | 12 | 3 | 1059.01  | 1026.90  | 54.97   | o |
| -9  | 12 | 3 | 1988.79  | 2117.56  | 81.36   | o |
| -8  | 12 | 3 | 2016.81  | 1943.85  | 76.96   | o |
| -7  | 12 | 3 | 24958.50 | 25270.00 | 930.15  | o |
| -6  | 12 | 3 | 2915.98  | 2814.62  | 103.35  | o |
| -5  | 12 | 3 | 14014.80 | 14699.80 | 470.57  | o |
| -4  | 12 | 3 | 5.01     | 28.59    | 13.19   | < |
| -3  | 12 | 3 | 338.99   | 411.20   | 26.39   | o |
| -2  | 12 | 3 | 168.71   | 107.75   | 15.39   | o |
| -1  | 12 | 3 | 348.62   | 400.20   | 26.39   | o |
| 0   | 12 | 3 | 40.70    | 32.98    | 15.39   | < |
| 1   | 12 | 3 | 11133.20 | 11256.30 | 365.02  | o |
| 2   | 12 | 3 | 2190.84  | 2220.91  | 83.56   | o |
| 3   | 12 | 3 | 8365.47  | 7876.54  | 257.27  | o |
| 4   | 12 | 3 | 8.95     | 4.40     | 15.39   | < |
| 5   | 12 | 3 | 1995.27  | 1974.63  | 74.76   | o |
| 6   | 12 | 3 | 48.42    | 46.18    | 17.59   | < |
| 7   | 12 | 3 | 487.35   | 430.99   | 28.59   | o |
| 8   | 12 | 3 | 929.50   | 872.97   | 57.17   | o |
| 9   | 12 | 3 | 6233.33  | 6631.95  | 224.29  | o |
| 10  | 12 | 3 | 2144.75  | 2286.88  | 90.16   | o |
| 11  | 12 | 3 | 19743.40 | 21067.90 | 670.67  | o |
| 12  | 12 | 3 | 1372.76  | 1486.47  | 63.77   | o |
| 13  | 12 | 3 | 129.47   | 114.34   | 19.79   | o |
| 14  | 12 | 3 | 985.91   | 1018.10  | 50.58   | o |
| 15  | 12 | 3 | 80.88    | 114.34   | 21.99   | o |
| 16  | 12 | 3 | 37.98    | 28.59    | 17.59   | < |
| 17  | 12 | 3 | 5597.24  | 5517.10  | 277.06  | o |

## regerite.cif

|     |    |   |          |          |         |   |
|-----|----|---|----------|----------|---------|---|
| -17 | 13 | 3 | 5.71     | 8.80     | 37.38   | < |
| -16 | 13 | 3 | 487.58   | 499.16   | 32.98   | o |
| -15 | 13 | 3 | 606.82   | 510.15   | 35.18   | o |
| -14 | 13 | 3 | 2135.81  | 2262.69  | 103.35  | o |
| -13 | 13 | 3 | 1319.32  | 1372.13  | 61.57   | o |
| -12 | 13 | 3 | 5189.77  | 5314.80  | 206.70  | o |
| -11 | 13 | 3 | 3.19     | 8.80     | 15.39   | < |
| -10 | 13 | 3 | 648.53   | 582.72   | 35.18   | o |
| -9  | 13 | 3 | 55.02    | 76.96    | 92.35   | < |
| -8  | 13 | 3 | 14873.90 | 14844.90 | 477.17  | o |
| -7  | 13 | 3 | 30.19    | 30.78    | 17.59   | < |
| -6  | 13 | 3 | 82.73    | 118.74   | 17.59   | o |
| -5  | 13 | 3 | 0.87     | 10.99    | 13.19   | < |
| -4  | 13 | 3 | 7158.81  | 7333.41  | 246.28  | o |
| -3  | 13 | 3 | 135.58   | 184.71   | 19.79   | o |
| -2  | 13 | 3 | 36355.70 | 36796.80 | 1163.23 | o |
| -1  | 13 | 3 | 1920.66  | 1893.27  | 74.76   | o |
| 0   | 13 | 3 | 2531.30  | 2297.88  | 87.96   | o |
| 1   | 13 | 3 | 373.13   | 367.22   | 26.39   | o |
| 2   | 13 | 3 | 4381.38  | 4131.78  | 145.13  | o |
| 3   | 13 | 3 | 677.54   | 635.49   | 35.18   | o |
| 4   | 13 | 3 | 7955.48  | 8571.40  | 327.64  | o |
| 5   | 13 | 3 | 133.30   | 149.53   | 19.79   | o |
| 6   | 13 | 3 | 37911.50 | 40031.40 | 1262.18 | o |
| 7   | 13 | 3 | 73.35    | 85.76    | 19.79   | o |
| 8   | 13 | 3 | 312.01   | 288.06   | 24.19   | o |
| 9   | 13 | 3 | 200.98   | 169.32   | 21.99   | o |
| 10  | 13 | 3 | 2498.41  | 2436.41  | 107.75  | o |
| 11  | 13 | 3 | 883.30   | 894.96   | 57.17   | o |
| 12  | 13 | 3 | 1466.61  | 1411.71  | 74.76   | o |
| 13  | 13 | 3 | 2.51     | 10.99    | 19.79   | < |
| 14  | 13 | 3 | 7439.94  | 7507.13  | 321.04  | o |
| 15  | 13 | 3 | 217.21   | 167.12   | 24.19   | o |
| 16  | 13 | 3 | 2541.36  | 2319.86  | 228.69  | o |
| 17  | 13 | 3 | 29.74    | 50.58    | 24.19   | < |
| -16 | 14 | 3 | 539.32   | 419.99   | 35.18   | o |
| -15 | 14 | 3 | 527.28   | 485.96   | 32.98   | o |
| -14 | 14 | 3 | 2510.69  | 2755.25  | 105.55  | o |
| -13 | 14 | 3 | 5077.88  | 5563.28  | 191.31  | o |
| -12 | 14 | 3 | 0.60     | 35.18    | 17.59   | < |
| -11 | 14 | 3 | 377.99   | 310.05   | 26.39   | o |
| -10 | 14 | 3 | 169.02   | 131.93   | 21.99   | o |
| -9  | 14 | 3 | 4480.15  | 4378.06  | 167.12  | o |
| -8  | 14 | 3 | 18.36    | 2.20     | 17.59   | < |
| -7  | 14 | 3 | 558.90   | 620.10   | 35.18   | o |
| -6  | 14 | 3 | 15.78    | 10.99    | 15.39   | < |
| -5  | 14 | 3 | 33510.30 | 33872.20 | 1152.24 | o |
| -4  | 14 | 3 | 2575.32  | 2574.94  | 98.95   | o |
| -3  | 14 | 3 | 23421.40 | 24194.80 | 769.62  | o |
| -2  | 14 | 3 | 286.88   | 208.90   | 26.39   | o |
| -1  | 14 | 3 | 3219.46  | 3146.66  | 129.74  | o |
| 0   | 14 | 3 | 124.83   | 96.75    | 21.99   | o |
| 1   | 14 | 3 | 5487.00  | 5545.69  | 219.89  | o |
| 2   | 14 | 3 | 884.02   | 899.36   | 46.18   | o |

## regerite.cif

|     |    |   |          |          |          |
|-----|----|---|----------|----------|----------|
| 3   | 14 | 3 | 1318.10  | 1389.72  | 59.37 o  |
| 4   | 14 | 3 | 290.05   | 266.07   | 24.19 o  |
| 5   | 14 | 3 | 2239.54  | 2212.12  | 96.75 o  |
| 6   | 14 | 3 | 1472.03  | 1446.89  | 61.57 o  |
| 7   | 14 | 3 | 6478.88  | 6713.31  | 259.47 o |
| 8   | 14 | 3 | 2772.35  | 3146.66  | 114.34 o |
| 9   | 14 | 3 | 619.38   | 602.51   | 41.78 o  |
| 10  | 14 | 3 | 5.07     | 8.80     | 13.19 <  |
| 11  | 14 | 3 | 3262.58  | 3608.43  | 169.32 o |
| 12  | 14 | 3 | 1678.08  | 1745.95  | 83.56 o  |
| 13  | 14 | 3 | 893.18   | 897.16   | 50.58 o  |
| 14  | 14 | 3 | 414.54   | 305.65   | 32.98 o  |
| 15  | 14 | 3 | 3484.99  | 3199.43  | 142.93 o |
| 16  | 14 | 3 | 949.17   | 901.56   | 70.37 o  |
| -15 | 15 | 3 | 74.16    | 109.95   | 19.79 o  |
| -14 | 15 | 3 | 16270.10 | 18833.80 | 606.90 o |
| -13 | 15 | 3 | 3151.98  | 3509.48  | 129.74 o |
| -12 | 15 | 3 | 6823.71  | 7452.15  | 294.66 o |
| -11 | 15 | 3 | 255.59   | 239.68   | 24.19 o  |
| -10 | 15 | 3 | 15.63    | 19.79    | 15.39 <  |
| -9  | 15 | 3 | 4.03     | 15.39    | 15.39 <  |
| -8  | 15 | 3 | 1446.01  | 1453.49  | 70.37 o  |
| -7  | 15 | 3 | 73.03    | 54.97    | 19.79 <  |
| -6  | 15 | 3 | 2971.47  | 3142.26  | 116.54 o |
| -5  | 15 | 3 | 2545.61  | 2649.70  | 118.74 o |
| -4  | 15 | 3 | 15.20    | 6.60     | 13.19 <  |
| -3  | 15 | 3 | 446.67   | 404.60   | 32.98 o  |
| -2  | 15 | 3 | 9604.25  | 9501.55  | 360.62 o |
| -1  | 15 | 3 | 142.49   | 149.53   | 21.99 o  |
| 0   | 15 | 3 | 24.01    | 30.78    | 48.38 <  |
| 1   | 15 | 3 | 3.40     | 2.20     | 17.59 <  |
| 2   | 15 | 3 | 1950.30  | 1873.48  | 87.96 o  |
| 3   | 15 | 3 | 1814.62  | 1941.65  | 79.16 o  |
| 4   | 15 | 3 | 3275.09  | 3190.64  | 116.54 o |
| 5   | 15 | 3 | 17.22    | 21.99    | 15.39 <  |
| 6   | 15 | 3 | 21275.70 | 22499.40 | 828.99 o |
| 7   | 15 | 3 | 578.23   | 587.11   | 35.18 o  |
| 8   | 15 | 3 | 4801.66  | 4787.06  | 191.31 o |
| 9   | 15 | 3 | 72.22    | 63.77    | 19.79 o  |
| 10  | 15 | 3 | 8151.87  | 8556.01  | 327.64 o |
| 11  | 15 | 3 | 3417.28  | 3359.96  | 142.93 o |
| 12  | 15 | 3 | 11064.30 | 11797.20 | 441.98 o |
| 13  | 15 | 3 | 790.99   | 752.03   | 46.18 o  |
| 14  | 15 | 3 | 177.86   | 120.94   | 24.19 o  |
| 15  | 15 | 3 | 1562.99  | 1644.79  | 103.35 o |
| 16  | 15 | 3 | 7.11     | 17.59    | 37.38 <  |
| -15 | 16 | 3 | 762.20   | 547.53   | 72.56 o  |
| -14 | 16 | 3 | 5211.25  | 5473.12  | 219.89 o |
| -13 | 16 | 3 | 3885.31  | 3980.05  | 283.66 o |
| -12 | 16 | 3 | 518.57   | 503.55   | 37.38 o  |
| -11 | 16 | 3 | 348.65   | 329.84   | 35.18 o  |
| -10 | 16 | 3 | 572.75   | 472.77   | 32.98 o  |
| -9  | 16 | 3 | 1287.03  | 1167.63  | 59.37 o  |
| -8  | 16 | 3 | 3837.52  | 3894.29  | 145.13 o |

## regerite.cif

|     |    |   |          |          |           |
|-----|----|---|----------|----------|-----------|
| -7  | 16 | 3 | 56.83    | 30.78    | 17.59 <   |
| -6  | 16 | 3 | 83.71    | 90.16    | 15.39 o   |
| -5  | 16 | 3 | 1721.35  | 1618.41  | 79.16 o   |
| -4  | 16 | 3 | 259.47   | 301.25   | 24.19 o   |
| -3  | 16 | 3 | 33123.40 | 35741.30 | 1134.64 o |
| -2  | 16 | 3 | 126.38   | 147.33   | 24.19 o   |
| -1  | 16 | 3 | 5014.57  | 5009.15  | 200.10 o  |
| 0   | 16 | 3 | 361.26   | 354.03   | 28.59 o   |
| 1   | 16 | 3 | 24536.80 | 25393.20 | 868.58 o  |
| 2   | 16 | 3 | 8.00     | 35.18    | 19.79 <   |
| 3   | 16 | 3 | 15065.70 | 15724.50 | 589.31 o  |
| 4   | 16 | 3 | 414.73   | 384.81   | 28.59 o   |
| 5   | 16 | 3 | 34.33    | 41.78    | 15.39 <   |
| 6   | 16 | 3 | 2575.77  | 2671.69  | 118.74 o  |
| 7   | 16 | 3 | 828.90   | 710.25   | 39.58 o   |
| 8   | 16 | 3 | 1915.32  | 1754.74  | 72.56 o   |
| 9   | 16 | 3 | 2146.67  | 2005.42  | 81.36 o   |
| 10  | 16 | 3 | 1459.56  | 1554.64  | 76.96 o   |
| 11  | 16 | 3 | 5936.17  | 6058.03  | 206.70 o  |
| 12  | 16 | 3 | 2126.44  | 2053.79  | 83.56 o   |
| 13  | 16 | 3 | 130.26   | 123.14   | 19.79 o   |
| 14  | 16 | 3 | 136.06   | 184.71   | 32.98 o   |
| 15  | 16 | 3 | 728.97   | 336.43   | 54.97 o   |
| -14 | 17 | 3 | 352.91   | 281.46   | 57.17 o   |
| -13 | 17 | 3 | 229.84   | 235.29   | 26.39 o   |
| -12 | 17 | 3 | 219.18   | 217.69   | 24.19 o   |
| -11 | 17 | 3 | 1077.43  | 1119.25  | 61.57 o   |
| -10 | 17 | 3 | 341.55   | 325.44   | 26.39 o   |
| -9  | 17 | 3 | 1406.30  | 1407.31  | 90.16 o   |
| -8  | 17 | 3 | 18824.30 | 19610.00 | 727.84 o  |
| -7  | 17 | 3 | 469.16   | 437.59   | 32.98 o   |
| -6  | 17 | 3 | 10252.70 | 10148.00 | 336.43 o  |
| -5  | 17 | 3 | 1.43     | -13.19   | 15.39 <   |
| -4  | 17 | 3 | 5485.16  | 5576.47  | 191.31 o  |
| -3  | 17 | 3 | 155.31   | 131.93   | 21.99 o   |
| -2  | 17 | 3 | 4790.31  | 5114.70  | 202.30 o  |
| -1  | 17 | 3 | 137.63   | 169.32   | 21.99 o   |
| 0   | 17 | 3 | 9671.90  | 10671.40 | 351.83 o  |
| 1   | 17 | 3 | 44.49    | 81.36    | 19.79 o   |
| 2   | 17 | 3 | 3269.74  | 3469.90  | 127.54 o  |
| 3   | 17 | 3 | 0.63     | 13.19    | 17.59 <   |
| 4   | 17 | 3 | 1076.19  | 1092.87  | 61.57 o   |
| 5   | 17 | 3 | 9.31     | 10.99    | 114.34 <  |
| 6   | 17 | 3 | 18379.90 | 19880.50 | 635.49 o  |
| 7   | 17 | 3 | 985.06   | 1026.90  | 61.57 o   |
| 8   | 17 | 3 | 1023.29  | 1011.50  | 50.58 o   |
| 9   | 17 | 3 | 255.42   | 246.28   | 24.19 o   |
| 10  | 17 | 3 | 7.31     | 43.98    | 17.59 <   |
| 11  | 17 | 3 | 766.97   | 760.83   | 41.78 o   |
| 12  | 17 | 3 | 151.03   | 140.73   | 19.79 o   |
| 13  | 17 | 3 | 1.05     | 10.99    | 24.19 <   |
| 14  | 17 | 3 | 453.09   | 356.23   | 41.78 o   |
| -13 | 18 | 3 | 212.87   | 189.11   | 50.58 o   |
| -12 | 18 | 3 | 182.02   | 184.71   | 21.99 o   |

## regerite.cif

|     |    |   |          |          |        |   |
|-----|----|---|----------|----------|--------|---|
| -11 | 18 | 3 | 7217.82  | 8085.44  | 270.47 | o |
| -10 | 18 | 3 | 42.40    | 41.78    | 15.39  | < |
| -9  | 18 | 3 | 3501.54  | 3318.18  | 120.94 | o |
| -8  | 18 | 3 | 9.75     | 35.18    | 15.39  | < |
| -7  | 18 | 3 | 6694.07  | 7012.37  | 239.68 | o |
| -6  | 18 | 3 | 41.51    | 72.56    | 17.59  | o |
| -5  | 18 | 3 | 49.30    | 57.17    | 19.79  | < |
| -4  | 18 | 3 | 582.76   | 617.90   | 37.38  | o |
| -3  | 18 | 3 | 82.30    | 116.54   | 24.19  | o |
| -2  | 18 | 3 | 44.37    | 30.78    | 17.59  | < |
| -1  | 18 | 3 | 6360.13  | 6898.02  | 233.09 | o |
| 0   | 18 | 3 | 276.61   | 303.45   | 28.59  | o |
| 1   | 18 | 3 | 12076.90 | 13732.30 | 446.38 | o |
| 2   | 18 | 3 | 417.85   | 470.57   | 32.98  | o |
| 3   | 18 | 3 | 8067.65  | 8529.63  | 281.46 | o |
| 4   | 18 | 3 | 93.46    | 98.95    | 19.79  | o |
| 5   | 18 | 3 | 2540.93  | 2570.54  | 116.54 | o |
| 6   | 18 | 3 | 1.31     | 24.19    | 15.39  | < |
| 7   | 18 | 3 | 7636.81  | 8762.71  | 292.46 | o |
| 8   | 18 | 3 | 49.16    | 26.39    | 17.59  | < |
| 9   | 18 | 3 | 428.19   | 450.78   | 35.18  | o |
| 10  | 18 | 3 | 981.18   | 919.15   | 46.18  | o |
| 11  | 18 | 3 | 4797.50  | 4782.66  | 200.10 | o |
| 12  | 18 | 3 | 147.76   | 127.54   | 28.59  | o |
| 13  | 18 | 3 | 374.90   | 351.83   | 41.78  | o |
| -12 | 19 | 3 | 2.64     | -10.99   | 24.19  | < |
| -11 | 19 | 3 | 678.63   | 532.14   | 37.38  | o |
| -10 | 19 | 3 | 97.71    | 52.77    | 15.39  | o |
| -9  | 19 | 3 | 124.99   | 98.95    | 17.59  | o |
| -8  | 19 | 3 | 148.65   | 136.33   | 21.99  | o |
| -7  | 19 | 3 | 26.35    | 19.79    | 19.79  | < |
| -6  | 19 | 3 | 17856.10 | 19970.60 | 642.09 | o |
| -5  | 19 | 3 | 34.41    | 43.98    | 19.79  | < |
| -4  | 19 | 3 | 7513.54  | 7333.41  | 266.07 | o |
| -3  | 19 | 3 | 414.61   | 376.02   | 32.98  | o |
| -2  | 19 | 3 | 22.48    | 30.78    | 19.79  | < |
| -1  | 19 | 3 | 23.09    | 4.40     | 19.79  | < |
| 0   | 19 | 3 | 9829.62  | 10653.80 | 398.01 | o |
| 1   | 19 | 3 | 249.05   | 252.88   | 26.39  | o |
| 2   | 19 | 3 | 2254.67  | 2377.04  | 94.55  | o |
| 3   | 19 | 3 | 531.13   | 536.54   | 35.18  | o |
| 4   | 19 | 3 | 22336.20 | 23941.90 | 883.97 | o |
| 5   | 19 | 3 | 1102.91  | 1103.86  | 54.97  | o |
| 6   | 19 | 3 | 100.76   | 142.93   | 24.19  | o |
| 7   | 19 | 3 | 48.53    | 54.97    | 17.59  | o |
| 8   | 19 | 3 | 3173.16  | 3366.55  | 125.34 | o |
| 9   | 19 | 3 | 1.48     | 4.40     | 15.39  | < |
| 10  | 19 | 3 | 183.61   | 164.92   | 26.39  | o |
| 11  | 19 | 3 | 31.80    | 32.98    | 21.99  | < |
| 12  | 19 | 3 | 4773.64  | 5020.14  | 257.27 | o |
| -11 | 20 | 3 | 271.98   | 175.91   | 46.18  | o |
| -10 | 20 | 3 | 4.69     | -15.39   | 15.39  | < |
| -9  | 20 | 3 | 1648.04  | 1583.23  | 87.96  | o |
| -8  | 20 | 3 | 581.53   | 551.93   | 35.18  | o |



## regerite.cif

|    |    |   |         |         |        |   |
|----|----|---|---------|---------|--------|---|
| -7 | 20 | 3 | 116.50  | 138.53  | 19.79  | o |
| -6 | 20 | 3 | 758.39  | 653.08  | 39.58  | o |
| -5 | 20 | 3 | 16.31   | 54.97   | 19.79  | < |
| -4 | 20 | 3 | 22.99   | 19.79   | 17.59  | < |
| -3 | 20 | 3 | 212.67  | 303.45  | 26.39  | o |
| -2 | 20 | 3 | 1.40    | -8.80   | 178.11 | < |
| -1 | 20 | 3 | 8286.61 | 8668.16 | 288.06 | o |
| 0  | 20 | 3 | 344.49  | 369.42  | 35.18  | o |
| 1  | 20 | 3 | 1002.03 | 945.54  | 50.58  | o |
| 2  | 20 | 3 | 886.92  | 897.16  | 48.38  | o |
| 3  | 20 | 3 | 1957.58 | 1836.10 | 76.96  | o |
| 4  | 20 | 3 | 575.82  | 545.33  | 37.38  | o |
| 5  | 20 | 3 | 7145.05 | 7423.57 | 290.26 | o |
| 6  | 20 | 3 | 539.33  | 534.34  | 35.18  | o |
| 7  | 20 | 3 | 482.75  | 422.19  | 32.98  | o |
| 8  | 20 | 3 | 228.46  | 219.89  | 28.59  | o |
| 9  | 20 | 3 | 2926.28 | 2915.77 | 160.52 | o |
| 10 | 20 | 3 | 3.65    | -4.40   | 19.79  | < |
| 11 | 20 | 3 | 1507.04 | 1007.11 | 74.76  | o |
| -9 | 21 | 3 | 331.75  | 142.93  | 103.35 | < |
| -8 | 21 | 3 | 641.12  | 461.77  | 46.18  | o |
| -7 | 21 | 3 | 505.99  | 470.57  | 37.38  | o |
| -6 | 21 | 3 | 1554.26 | 1457.89 | 63.77  | o |
| -5 | 21 | 3 | 1.18    | 0.00    | 43.98  | < |
| -4 | 21 | 3 | 171.57  | 224.29  | 26.39  | o |
| -3 | 21 | 3 | 741.67  | 802.61  | 43.98  | o |
| -2 | 21 | 3 | 5075.01 | 5275.22 | 184.71 | o |
| -1 | 21 | 3 | 73.56   | 46.18   | 17.59  | < |
| 0  | 21 | 3 | 1333.72 | 1424.90 | 92.35  | o |
| 1  | 21 | 3 | 1.72    | 4.40    | 35.18  | < |
| 2  | 21 | 3 | 1177.28 | 1051.09 | 61.57  | o |
| 3  | 21 | 3 | 32.00   | 43.98   | 15.39  | < |
| 4  | 21 | 3 | 1667.90 | 1556.84 | 79.16  | o |
| 5  | 21 | 3 | 279.78  | 288.06  | 26.39  | o |
| 6  | 21 | 3 | 7415.85 | 7045.35 | 283.66 | o |
| 7  | 21 | 3 | 547.46  | 556.33  | 50.58  | o |
| 8  | 21 | 3 | 101.91  | 87.96   | 21.99  | o |
| 9  | 21 | 3 | 110.23  | 98.95   | 24.19  | o |
| -8 | 22 | 3 | 48.77   | -2.20   | 41.78  | < |
| -7 | 22 | 3 | 6561.85 | 4147.17 | 241.88 | o |
| -6 | 22 | 3 | 779.98  | 642.09  | 52.77  | o |
| -5 | 22 | 3 | 982.08  | 644.28  | 46.18  | o |
| -4 | 22 | 3 | 422.71  | 389.21  | 32.98  | o |
| -3 | 22 | 3 | 52.76   | 87.96   | 21.99  | o |
| -2 | 22 | 3 | 307.28  | 316.64  | 32.98  | o |
| -1 | 22 | 3 | 1328.22 | 1365.53 | 63.77  | o |
| 0  | 22 | 3 | 518.54  | 503.55  | 35.18  | o |
| 1  | 22 | 3 | 508.81  | 413.40  | 37.38  | o |
| 2  | 22 | 3 | 57.07   | 28.59   | 19.79  | < |
| 3  | 22 | 3 | 0.35    | 0.00    | 17.59  | < |
| 4  | 22 | 3 | 32.53   | 21.99   | 19.79  | < |
| 5  | 22 | 3 | 5393.03 | 5750.19 | 332.04 | o |
| 6  | 22 | 3 | 32.49   | 39.58   | 24.19  | < |
| 7  | 22 | 3 | 350.71  | 301.25  | 39.58  | o |

## regerite.cif

|     |    |   |           |           |         |   |
|-----|----|---|-----------|-----------|---------|---|
| 8   | 22 | 3 | 1782.89   | 1411.71   | 129.74  | o |
| -5  | 23 | 3 | 238.81    | 151.73    | 52.77   | < |
| -4  | 23 | 3 | 3746.45   | 2515.57   | 136.33  | o |
| -3  | 23 | 3 | 227.22    | 189.11    | 32.98   | o |
| -2  | 23 | 3 | 117.33    | 68.17     | 28.59   | < |
| -1  | 23 | 3 | 35.54     | 76.96     | 30.78   | < |
| 0   | 23 | 3 | 3074.35   | 2819.02   | 156.12  | o |
| 1   | 23 | 3 | 158.66    | 131.93    | 30.78   | o |
| 2   | 23 | 3 | 2537.07   | 2249.50   | 131.93  | o |
| 3   | 23 | 3 | 210.86    | 193.51    | 32.98   | o |
| 4   | 23 | 3 | 14029.70  | 15020.80  | 804.81  | o |
| 5   | 23 | 3 | 636.25    | 468.37    | 50.58   | o |
| -1  | 24 | 3 | 13647.80  | 14031.30  | 1277.57 | o |
| 0   | 24 | 3 | 97.97     | 48.38     | 37.38   | < |
| 1   | 24 | 3 | 2193.03   | 1345.74   | 134.13  | o |
| -20 | 0  | 4 | 126.53    | 114.34    | 21.99   | o |
| -19 | 0  | 4 | 867.29    | 807.01    | 54.97   | o |
| -18 | 0  | 4 | 6615.01   | 6634.15   | 312.25  | o |
| -17 | 0  | 4 | 3450.06   | 3421.53   | 230.89  | o |
| -16 | 0  | 4 | 191.84    | 193.51    | 24.19   | o |
| -15 | 0  | 4 | 120.69    | 149.53    | 21.99   | o |
| -14 | 0  | 4 | 56.63     | 61.57     | 17.59   | o |
| -13 | 0  | 4 | 8519.91   | 8668.16   | 395.81  | o |
| -12 | 0  | 4 | 71022.90  | 69508.00  | 3091.69 | o |
| -11 | 0  | 4 | 5289.02   | 5066.32   | 237.48  | o |
| -10 | 0  | 4 | 33817.40  | 35622.60  | 1592.02 | o |
| -9  | 0  | 4 | 9154.44   | 9132.13   | 413.40  | o |
| -8  | 0  | 4 | 26675.10  | 24724.70  | 1570.03 | o |
| -7  | 0  | 4 | 2856.34   | 2797.03   | 134.13  | o |
| -6  | 0  | 4 | 43895.50  | 43901.50  | 1950.45 | o |
| -5  | 0  | 4 | 8.80      | -24.19    | 15.39   | < |
| -4  | 0  | 4 | 104017.00 | 100227.00 | 4450.62 | o |
| -3  | 0  | 4 | 93.37     | 35.18     | 10.99   | o |
| -2  | 0  | 4 | 122854.00 | 119157.00 | 5286.21 | o |
| -1  | 0  | 4 | 547.73    | 448.58    | 26.39   | o |
| 0   | 0  | 4 | 15469.20  | 17017.50  | 756.43  | o |
| 1   | 0  | 4 | 96.94     | 76.96     | 8.80    | o |
| 2   | 0  | 4 | 65744.50  | 52325.60  | 2322.06 | o |
| 3   | 0  | 4 | 159.18    | 65.97     | 10.99   | o |
| 4   | 0  | 4 | 9701.16   | 8256.96   | 373.82  | o |
| 5   | 0  | 4 | 1069.29   | 1081.87   | 57.17   | o |
| 6   | 0  | 4 | 60877.70  | 61222.40  | 2717.87 | o |
| 7   | 0  | 4 | 3831.89   | 3788.75   | 246.28  | o |
| 8   | 0  | 4 | 25343.90  | 25437.20  | 1139.04 | o |
| 9   | 0  | 4 | 87.22     | 162.72    | 19.79   | o |
| 10  | 0  | 4 | 592.16    | 598.11    | 39.58   | o |
| 11  | 0  | 4 | 189.39    | 197.90    | 21.99   | o |
| 12  | 0  | 4 | 1748.08   | 2027.41   | 105.55  | o |
| 13  | 0  | 4 | 6001.09   | 6403.27   | 419.99  | o |
| 14  | 0  | 4 | 11233.00  | 13176.00  | 848.78  | o |
| 15  | 0  | 4 | 817.22    | 978.52    | 61.57   | o |
| 16  | 0  | 4 | 1783.88   | 1772.33   | 98.95   | o |
| 17  | 0  | 4 | 27.04     | 74.76     | 24.19   | o |
| 18  | 0  | 4 | 31.27     | 54.97     | 17.59   | o |

## regerite.cif

|     |   |   |           |          |           |
|-----|---|---|-----------|----------|-----------|
| 19  | 0 | 4 | 225.37    | 92.35    | 35.18 <   |
| -20 | 1 | 4 | 93.79     | 96.75    | 15.39 o   |
| -19 | 1 | 4 | 86.72     | 92.35    | 15.39 o   |
| -18 | 1 | 4 | 9077.44   | 9820.39  | 318.84 o  |
| -17 | 1 | 4 | 7403.60   | 7872.15  | 358.42 o  |
| -16 | 1 | 4 | 4475.43   | 4822.24  | 162.72 o  |
| -15 | 1 | 4 | 207.02    | 235.29   | 19.79 o   |
| -14 | 1 | 4 | 66.91     | 50.58    | 13.19 o   |
| -13 | 1 | 4 | 13010.40  | 12632.80 | 406.80 o  |
| -12 | 1 | 4 | 9195.23   | 9640.08  | 310.05 o  |
| -11 | 1 | 4 | 3618.35   | 3608.43  | 123.14 o  |
| -10 | 1 | 4 | 1623.90   | 1666.78  | 61.57 o   |
| -9  | 1 | 4 | 41037.30  | 41390.30 | 1306.16 o |
| -8  | 1 | 4 | 39.34     | 52.77    | 17.59 o   |
| -7  | 1 | 4 | 102650.00 | 97482.70 | 3060.90 o |
| -6  | 1 | 4 | 573.47    | 602.51   | 26.39 o   |
| -5  | 1 | 4 | 7136.60   | 6706.72  | 215.49 o  |
| -4  | 1 | 4 | 920.37    | 974.12   | 35.18 o   |
| -3  | 1 | 4 | 21927.10  | 19585.80 | 617.90 o  |
| -2  | 1 | 4 | 21.77     | 24.19    | 6.60 o    |
| -1  | 1 | 4 | 11816.30  | 10884.70 | 367.22 o  |
| 0   | 1 | 4 | 61.88     | 81.36    | 10.99 o   |
| 1   | 1 | 4 | 1203.39   | 2434.21  | 116.54 o  |
| 2   | 1 | 4 | 505.13    | 492.56   | 17.59 o   |
| 3   | 1 | 4 | 10696.20  | 10680.20 | 336.43 o  |
| 4   | 1 | 4 | 80.90     | 50.58    | 6.60 o    |
| 5   | 1 | 4 | 2283.82   | 2713.47  | 96.75 o   |
| 6   | 1 | 4 | 1564.80   | 1508.46  | 52.77 o   |
| 7   | 1 | 4 | 44602.00  | 42694.30 | 1552.44 o |
| 8   | 1 | 4 | 5498.25   | 5385.16  | 202.30 o  |
| 9   | 1 | 4 | 8720.44   | 9305.85  | 299.05 o  |
| 10  | 1 | 4 | 801.51    | 802.61   | 35.18 o   |
| 11  | 1 | 4 | 528.41    | 510.15   | 26.39 o   |
| 12  | 1 | 4 | 51.87     | 57.17    | 10.99 o   |
| 13  | 1 | 4 | 7185.81   | 7458.75  | 281.46 o  |
| 14  | 1 | 4 | 1322.96   | 1405.11  | 65.97 o   |
| 15  | 1 | 4 | 3860.11   | 4340.68  | 147.33 o  |
| 16  | 1 | 4 | 607.03    | 644.28   | 35.18 o   |
| 17  | 1 | 4 | 106.71    | 116.54   | 17.59 o   |
| 18  | 1 | 4 | 1207.13   | 1211.61  | 52.77 o   |
| 19  | 1 | 4 | 823.51    | 767.42   | 41.78 o   |
| 20  | 1 | 4 | 427.45    | 140.73   | 57.17 <   |
| -20 | 2 | 4 | 104.55    | 94.55    | 15.39 o   |
| -19 | 2 | 4 | 678.40    | 675.07   | 35.18 o   |
| -18 | 2 | 4 | 6175.42   | 6255.94  | 211.10 o  |
| -17 | 2 | 4 | 2551.35   | 2493.58  | 107.75 o  |
| -16 | 2 | 4 | 12577.80  | 13499.20 | 437.59 o  |
| -15 | 2 | 4 | 393.66    | 387.01   | 24.19 o   |
| -14 | 2 | 4 | 12.46     | 30.78    | 10.99 <   |
| -13 | 2 | 4 | 6140.54   | 6288.92  | 208.90 o  |
| -12 | 2 | 4 | 6149.63   | 6135.00  | 202.30 o  |
| -11 | 2 | 4 | 339.25    | 303.45   | 19.79 o   |
| -10 | 2 | 4 | 6271.23   | 5838.14  | 191.31 o  |
| -9  | 2 | 4 | 1753.22   | 1732.75  | 63.77 o   |

## regerite.cif

|     |   |   |          |          |         |   |
|-----|---|---|----------|----------|---------|---|
| -8  | 2 | 4 | 39398.70 | 38586.70 | 1405.11 | o |
| -7  | 2 | 4 | 9578.44  | 9105.74  | 290.26  | o |
| -6  | 2 | 4 | 6608.79  | 6777.08  | 250.68  | o |
| -5  | 2 | 4 | 845.56   | 758.63   | 30.78   | o |
| -4  | 2 | 4 | 3510.56  | 3929.48  | 127.54  | o |
| -3  | 2 | 4 | 26.20    | 32.98    | 6.60    | o |
| -2  | 2 | 4 | 5805.56  | 6066.83  | 208.90  | o |
| -1  | 2 | 4 | 616.50   | 507.95   | 24.19   | o |
| 0   | 2 | 4 | 6141.21  | 5127.89  | 233.09  | o |
| 1   | 2 | 4 | 63.35    | 52.77    | 13.19   | o |
| 2   | 2 | 4 | 5544.19  | 5660.03  | 180.31  | o |
| 3   | 2 | 4 | 462.77   | 369.42   | 15.39   | o |
| 4   | 2 | 4 | 9011.08  | 8512.03  | 268.27  | o |
| 5   | 2 | 4 | 296.88   | 186.91   | 10.99   | o |
| 6   | 2 | 4 | 258.45   | 406.80   | 21.99   | o |
| 7   | 2 | 4 | 2786.98  | 2643.11  | 103.35  | o |
| 8   | 2 | 4 | 36221.90 | 34545.10 | 1255.59 | o |
| 9   | 2 | 4 | 2320.84  | 2198.92  | 76.96   | o |
| 10  | 2 | 4 | 11156.90 | 11737.90 | 376.02  | o |
| 11  | 2 | 4 | 38.66    | 54.97    | 10.99   | o |
| 12  | 2 | 4 | 1072.79  | 1081.87  | 43.98   | o |
| 13  | 2 | 4 | 1572.66  | 1519.46  | 68.17   | o |
| 14  | 2 | 4 | 312.91   | 393.61   | 28.59   | o |
| 15  | 2 | 4 | 1493.77  | 1644.79  | 63.77   | o |
| 16  | 2 | 4 | 10389.70 | 11981.90 | 387.01  | o |
| 17  | 2 | 4 | 1348.44  | 1396.32  | 65.97   | o |
| 18  | 2 | 4 | 2092.18  | 1785.53  | 81.36   | o |
| 19  | 2 | 4 | 1981.14  | 1554.64  | 65.97   | o |
| 20  | 2 | 4 | 105.27   | -6.60    | 21.99   | < |
| -20 | 3 | 4 | 3276.71  | 3324.77  | 230.89  | o |
| -19 | 3 | 4 | 3594.44  | 3654.61  | 129.74  | o |
| -18 | 3 | 4 | 1760.65  | 1851.49  | 72.56   | o |
| -17 | 3 | 4 | 427.63   | 470.57   | 30.78   | o |
| -16 | 3 | 4 | 2.29     | 17.59    | 10.99   | < |
| -15 | 3 | 4 | 43.20    | 74.76    | 13.19   | o |
| -14 | 3 | 4 | 197.26   | 160.52   | 17.59   | o |
| -13 | 3 | 4 | 7829.19  | 7610.48  | 250.68  | o |
| -12 | 3 | 4 | 5733.60  | 5813.95  | 191.31  | o |
| -11 | 3 | 4 | 33.46    | 63.77    | 15.39   | o |
| -10 | 3 | 4 | 1656.37  | 1537.05  | 59.37   | o |
| -9  | 3 | 4 | 4184.04  | 4228.53  | 138.53  | o |
| -8  | 3 | 4 | 1560.31  | 1482.07  | 65.97   | o |
| -7  | 3 | 4 | 5940.74  | 6174.58  | 230.89  | o |
| -6  | 3 | 4 | 299.24   | 222.09   | 15.39   | o |
| -5  | 3 | 4 | 27356.40 | 28260.60 | 888.36  | o |
| -4  | 3 | 4 | 2133.53  | 2495.78  | 83.56   | o |
| -3  | 3 | 4 | 11538.00 | 11113.40 | 351.83  | o |
| -2  | 3 | 4 | 877.32   | 639.89   | 26.39   | o |
| -1  | 3 | 4 | 18477.70 | 22481.80 | 708.05  | o |
| 0   | 3 | 4 | 1598.42  | 1462.28  | 72.56   | o |
| 1   | 3 | 4 | 25400.90 | 26745.50 | 971.92  | o |
| 2   | 3 | 4 | 551.65   | 624.49   | 24.19   | o |
| 3   | 3 | 4 | 3469.33  | 3533.67  | 114.34  | o |
| 4   | 3 | 4 | 61.63    | 50.58    | 8.80    | o |

## regerite.cif

|     |   |   |          |          |           |
|-----|---|---|----------|----------|-----------|
| 5   | 3 | 4 | 19646.80 | 18031.20 | 567.32 o  |
| 6   | 3 | 4 | 649.16   | 613.50   | 26.39 o   |
| 7   | 3 | 4 | 4793.96  | 5123.49  | 189.11 o  |
| 8   | 3 | 4 | 3610.50  | 3573.25  | 118.74 o  |
| 9   | 3 | 4 | 13845.10 | 13356.30 | 426.59 o  |
| 10  | 3 | 4 | 1064.73  | 949.93   | 39.58 o   |
| 11  | 3 | 4 | 467.45   | 389.21   | 21.99 o   |
| 12  | 3 | 4 | 1211.12  | 1350.14  | 52.77 o   |
| 13  | 3 | 4 | 726.47   | 749.83   | 39.58 o   |
| 14  | 3 | 4 | 212.26   | 215.49   | 21.99 o   |
| 15  | 3 | 4 | 2300.13  | 2634.31  | 94.55 o   |
| 16  | 3 | 4 | 3584.91  | 4032.83  | 138.53 o  |
| 17  | 3 | 4 | 4669.29  | 5171.87  | 200.10 o  |
| 18  | 3 | 4 | 398.10   | 362.82   | 26.39 o   |
| 19  | 3 | 4 | 2053.28  | 1888.88  | 74.76 o   |
| -19 | 4 | 4 | 1892.79  | 1671.18  | 68.17 o   |
| -18 | 4 | 4 | 567.72   | 527.74   | 30.78 o   |
| -17 | 4 | 4 | 101.08   | 116.54   | 15.39 o   |
| -16 | 4 | 4 | 4613.73  | 4927.79  | 169.32 o  |
| -15 | 4 | 4 | 714.23   | 598.11   | 32.98 o   |
| -14 | 4 | 4 | 38.24    | 59.37    | 15.39 o   |
| -13 | 4 | 4 | 273.10   | 204.50   | 24.19 o   |
| -12 | 4 | 4 | 9703.59  | 10035.90 | 373.82 o  |
| -11 | 4 | 4 | 803.19   | 699.26   | 35.18 o   |
| -10 | 4 | 4 | 2669.42  | 2658.50  | 92.35 o   |
| -9  | 4 | 4 | 649.22   | 659.68   | 30.78 o   |
| -8  | 4 | 4 | 170.98   | 215.49   | 19.79 o   |
| -7  | 4 | 4 | 82.91    | 65.97    | 13.19 o   |
| -6  | 4 | 4 | 33692.80 | 33782.10 | 1068.68 o |
| -5  | 4 | 4 | 3148.86  | 2977.34  | 114.34 o  |
| -4  | 4 | 4 | 55742.40 | 56822.40 | 1787.72 o |
| -3  | 4 | 4 | 233.71   | 147.33   | 13.19 o   |
| -2  | 4 | 4 | 4173.36  | 4483.61  | 145.13 o  |
| -1  | 4 | 4 | 1183.27  | 941.14   | 35.18 o   |
| 0   | 4 | 4 | 55350.40 | 52492.70 | 1763.54 o |
| 1   | 4 | 4 | 1249.10  | 1132.45  | 39.58 o   |
| 2   | 4 | 4 | 7526.26  | 6200.96  | 197.90 o  |
| 3   | 4 | 4 | 50.59    | 46.18    | 8.80 o    |
| 4   | 4 | 4 | 1981.47  | 2071.39  | 70.37 o   |
| 5   | 4 | 4 | 326.83   | 237.48   | 17.59 o   |
| 6   | 4 | 4 | 18499.90 | 17758.50 | 562.92 o  |
| 7   | 4 | 4 | 28.41    | 30.78    | 13.19 <   |
| 8   | 4 | 4 | 4770.99  | 5094.91  | 164.92 o  |
| 9   | 4 | 4 | 377.21   | 376.02   | 21.99 o   |
| 10  | 4 | 4 | 8741.19  | 8949.62  | 288.06 o  |
| 11  | 4 | 4 | 2236.79  | 2262.69  | 81.36 o   |
| 12  | 4 | 4 | 13720.10 | 15223.10 | 565.12 o  |
| 13  | 4 | 4 | 156.76   | 206.70   | 26.39 o   |
| 14  | 4 | 4 | 3105.17  | 3566.65  | 145.13 o  |
| 15  | 4 | 4 | 4.36     | 8.80     | 10.99 <   |
| 16  | 4 | 4 | 22.16    | 35.18    | 13.19 <   |
| 17  | 4 | 4 | 313.93   | 345.23   | 30.78 o   |
| 18  | 4 | 4 | 45.38    | 46.18    | 13.19 o   |
| 19  | 4 | 4 | 810.92   | 589.31   | 125.34 o  |

## regerite.cif

|     |   |   |          |          |           |
|-----|---|---|----------|----------|-----------|
| -19 | 5 | 4 | 1533.13  | 1328.15  | 57.17 o   |
| -18 | 5 | 4 | 572.35   | 659.68   | 35.18 o   |
| -17 | 5 | 4 | 6118.50  | 6642.95  | 259.47 o  |
| -16 | 5 | 4 | 2865.05  | 3184.04  | 114.34 o  |
| -15 | 5 | 4 | 8350.87  | 8419.68  | 277.06 o  |
| -14 | 5 | 4 | 2709.64  | 2975.14  | 107.75 o  |
| -13 | 5 | 4 | 3102.66  | 3074.10  | 109.95 o  |
| -12 | 5 | 4 | 831.98   | 820.20   | 39.58 o   |
| -11 | 5 | 4 | 26472.20 | 30633.20 | 974.12 o  |
| -10 | 5 | 4 | 682.83   | 747.63   | 35.18 o   |
| -9  | 5 | 4 | 3813.84  | 4336.28  | 147.33 o  |
| -8  | 5 | 4 | 194.12   | 261.67   | 19.79 o   |
| -7  | 5 | 4 | 2146.65  | 2460.60  | 85.76 o   |
| -6  | 5 | 4 | 307.58   | 360.62   | 30.78 o   |
| -5  | 5 | 4 | 28946.20 | 27169.90 | 857.58 o  |
| -4  | 5 | 4 | 785.72   | 664.08   | 32.98 o   |
| -3  | 5 | 4 | 13820.20 | 12850.50 | 411.20 o  |
| -2  | 5 | 4 | 63.29    | 37.38    | 8.80 o    |
| -1  | 5 | 4 | 30355.50 | 29461.20 | 925.75 o  |
| 0   | 5 | 4 | 89.50    | 48.38    | 8.80 o    |
| 1   | 5 | 4 | 71189.60 | 66181.00 | 2082.38 o |
| 2   | 5 | 4 | 96.17    | 107.75   | 10.99 o   |
| 3   | 5 | 4 | 262.06   | 85.76    | 10.99 o   |
| 4   | 5 | 4 | 6.29     | 4.40     | 8.80 <    |
| 5   | 5 | 4 | 11012.10 | 10396.50 | 334.24 o  |
| 6   | 5 | 4 | 3302.64  | 3384.14  | 129.74 o  |
| 7   | 5 | 4 | 10531.10 | 10348.10 | 334.24 o  |
| 8   | 5 | 4 | 822.61   | 844.39   | 41.78 o   |
| 9   | 5 | 4 | 5104.42  | 5620.45  | 184.71 o  |
| 10  | 5 | 4 | 24.73    | 32.98    | 10.99 <   |
| 11  | 5 | 4 | 7155.62  | 7667.65  | 250.68 o  |
| 12  | 5 | 4 | 187.85   | 208.90   | 17.59 o   |
| 13  | 5 | 4 | 1.21     | 24.19    | 15.39 <   |
| 14  | 5 | 4 | 4684.42  | 4925.59  | 167.12 o  |
| 15  | 5 | 4 | 5226.68  | 5512.70  | 184.71 o  |
| 16  | 5 | 4 | 521.95   | 569.52   | 37.38 o   |
| 17  | 5 | 4 | 2061.94  | 2368.24  | 101.15 o  |
| 18  | 5 | 4 | 219.00   | 195.70   | 19.79 o   |
| 19  | 5 | 4 | 453.64   | 373.82   | 30.78 o   |
| -19 | 6 | 4 | 1866.45  | 1706.36  | 79.16 o   |
| -18 | 6 | 4 | 9.18     | 0.00     | 10.99 <   |
| -17 | 6 | 4 | 390.11   | 430.99   | 32.98 o   |
| -16 | 6 | 4 | 5608.27  | 5772.17  | 224.29 o  |
| -15 | 6 | 4 | 866.05   | 859.78   | 41.78 o   |
| -14 | 6 | 4 | 11363.60 | 12920.90 | 415.60 o  |
| -13 | 6 | 4 | 541.41   | 534.34   | 35.18 o   |
| -12 | 6 | 4 | 3719.06  | 4274.71  | 169.32 o  |
| -11 | 6 | 4 | 4801.05  | 5745.79  | 193.51 o  |
| -10 | 6 | 4 | 17510.30 | 20885.40 | 668.47 o  |
| -9  | 6 | 4 | 4398.92  | 5275.22  | 175.91 o  |
| -8  | 6 | 4 | 2178.36  | 2517.77  | 90.16 o   |
| -7  | 6 | 4 | 737.75   | 756.43   | 39.58 o   |
| -6  | 6 | 4 | 23513.10 | 24353.10 | 774.02 o  |
| -5  | 6 | 4 | 1985.25  | 1943.85  | 79.16 o   |

## regerite.cif

|     |   |   |           |           |         |   |
|-----|---|---|-----------|-----------|---------|---|
| -4  | 6 | 4 | 2288.96   | 2748.65   | 94.55   | o |
| -3  | 6 | 4 | 152.85    | 125.34    | 13.19   | o |
| -2  | 6 | 4 | 36792.90  | 34340.60  | 1251.19 | o |
| -1  | 6 | 4 | 888.16    | 754.23    | 35.18   | o |
| 0   | 6 | 4 | 130385.00 | 122196.00 | 4435.23 | o |
| 1   | 6 | 4 | 199.96    | 283.66    | 19.79   | o |
| 2   | 6 | 4 | 127.51    | 140.73    | 13.19   | o |
| 3   | 6 | 4 | 1566.19   | 1675.58   | 59.37   | o |
| 4   | 6 | 4 | 17540.50  | 16940.50  | 534.34  | o |
| 5   | 6 | 4 | 4322.08   | 4448.42   | 167.12  | o |
| 6   | 6 | 4 | 16193.40  | 15669.50  | 496.96  | o |
| 7   | 6 | 4 | 477.18    | 481.56    | 24.19   | o |
| 8   | 6 | 4 | 5765.94   | 5967.88   | 226.49  | o |
| 9   | 6 | 4 | 1632.58   | 1589.82   | 61.57   | o |
| 10  | 6 | 4 | 3048.22   | 2893.78   | 101.15  | o |
| 11  | 6 | 4 | 334.14    | 351.83    | 28.59   | o |
| 12  | 6 | 4 | 3976.72   | 4290.10   | 145.13  | o |
| 13  | 6 | 4 | 1154.49   | 1110.46   | 48.38   | o |
| 14  | 6 | 4 | 12307.40  | 13670.70  | 441.98  | o |
| 15  | 6 | 4 | 328.39    | 296.86    | 24.19   | o |
| 16  | 6 | 4 | 3.81      | 21.99     | 13.19   | < |
| 17  | 6 | 4 | 20.51     | 10.99     | 13.19   | < |
| 18  | 6 | 4 | 1206.78   | 1132.45   | 50.58   | o |
| 19  | 6 | 4 | 659.77    | 558.53    | 46.18   | o |
| -19 | 7 | 4 | 576.46    | 611.30    | 43.98   | o |
| -18 | 7 | 4 | 693.07    | 595.91    | 35.18   | o |
| -17 | 7 | 4 | 182.95    | 193.51    | 21.99   | o |
| -16 | 7 | 4 | 9276.00   | 10528.40  | 404.60  | o |
| -15 | 7 | 4 | 3727.03   | 4252.72   | 147.33  | o |
| -14 | 7 | 4 | 5789.95   | 7003.57   | 233.09  | o |
| -13 | 7 | 4 | 3071.07   | 3403.93   | 140.73  | o |
| -12 | 7 | 4 | 28.81     | 19.79     | 19.79   | < |
| -11 | 7 | 4 | 809.16    | 989.52    | 43.98   | o |
| -10 | 7 | 4 | 1032.63   | 1237.99   | 50.58   | o |
| -9  | 7 | 4 | 27485.90  | 31721.70  | 1009.31 | o |
| -8  | 7 | 4 | 867.31    | 881.77    | 41.78   | o |
| -7  | 7 | 4 | 5273.78   | 6280.13   | 208.90  | o |
| -6  | 7 | 4 | 4890.42   | 4940.98   | 162.72  | o |
| -5  | 7 | 4 | 115053.00 | 113724.00 | 4127.38 | o |
| -4  | 7 | 4 | 928.89    | 787.22    | 39.58   | o |
| -3  | 7 | 4 | 57212.90  | 52941.30  | 1926.26 | o |
| -2  | 7 | 4 | 4.63      | 2.20      | 8.80    | < |
| -1  | 7 | 4 | 6374.25   | 6759.49   | 222.09  | o |
| 0   | 7 | 4 | 73.18     | 85.76     | 13.19   | o |
| 1   | 7 | 4 | 405.85    | 422.19    | 21.99   | o |
| 2   | 7 | 4 | 133.13    | 169.32    | 13.19   | o |
| 3   | 7 | 4 | 47169.00  | 45148.30  | 1642.60 | o |
| 4   | 7 | 4 | 744.55    | 646.48    | 35.18   | o |
| 5   | 7 | 4 | 64482.30  | 65398.20  | 2053.79 | o |
| 6   | 7 | 4 | 130.10    | 191.31    | 17.59   | o |
| 7   | 7 | 4 | 12599.00  | 12445.90  | 398.01  | o |
| 8   | 7 | 4 | 8.63      | 21.99     | 10.99   | < |
| 9   | 7 | 4 | 2921.25   | 3045.51   | 105.55  | o |
| 10  | 7 | 4 | 24.98     | 10.99     | 13.19   | < |

## regerite.cif

|     |   |   |          |          |          |
|-----|---|---|----------|----------|----------|
| 11  | 7 | 4 | 4613.73  | 4886.01  | 164.92 o |
| 12  | 7 | 4 | 211.10   | 195.70   | 17.59 o  |
| 13  | 7 | 4 | 9905.76  | 11027.60 | 358.42 o |
| 14  | 7 | 4 | 3261.78  | 3722.78  | 129.74 o |
| 15  | 7 | 4 | 761.69   | 760.83   | 39.58 o  |
| 16  | 7 | 4 | 28.36    | 15.39    | 21.99 <  |
| 17  | 7 | 4 | 248.43   | 281.46   | 28.59 o  |
| 18  | 7 | 4 | 54.96    | 46.18    | 21.99 <  |
| 19  | 7 | 4 | 138.55   | 87.96    | 24.19 o  |
| -19 | 8 | 4 | 1926.89  | 1374.33  | 118.74 o |
| -18 | 8 | 4 | 269.58   | 288.06   | 24.19 o  |
| -17 | 8 | 4 | 628.81   | 631.09   | 35.18 o  |
| -16 | 8 | 4 | 1342.21  | 1132.45  | 63.77 o  |
| -15 | 8 | 4 | 187.25   | 195.70   | 19.79 o  |
| -14 | 8 | 4 | 10646.20 | 13325.50 | 430.99 o |
| -13 | 8 | 4 | 429.44   | 441.98   | 70.37 o  |
| -12 | 8 | 4 | 439.82   | 622.29   | 35.18 o  |
| -11 | 8 | 4 | 3159.32  | 3898.69  | 134.13 o |
| -10 | 8 | 4 | 25.74    | 37.38    | 15.39 <  |
| -9  | 8 | 4 | 356.29   | 362.82   | 24.19 o  |
| -8  | 8 | 4 | 2792.49  | 2898.18  | 101.15 o |
| -7  | 8 | 4 | 600.20   | 675.07   | 32.98 o  |
| -6  | 8 | 4 | 1870.65  | 1935.05  | 83.56 o  |
| -5  | 8 | 4 | 1153.84  | 1150.04  | 46.18 o  |
| -4  | 8 | 4 | 1062.93  | 1068.68  | 52.77 o  |
| -3  | 8 | 4 | 724.60   | 657.48   | 30.78 o  |
| -2  | 8 | 4 | 157.15   | 107.75   | 13.19 o  |
| -1  | 8 | 4 | 39.30    | 6.60     | 10.99 <  |
| 0   | 8 | 4 | 22051.00 | 22171.70 | 818.00 o |
| 1   | 8 | 4 | 1389.03  | 1341.34  | 59.37 o  |
| 2   | 8 | 4 | 16271.20 | 16434.80 | 525.54 o |
| 3   | 8 | 4 | 439.74   | 404.60   | 24.19 o  |
| 4   | 8 | 4 | 974.37   | 1059.88  | 41.78 o  |
| 5   | 8 | 4 | 23.04    | 32.98    | 13.19 <  |
| 6   | 8 | 4 | 4858.65  | 5389.56  | 178.11 o |
| 7   | 8 | 4 | 142.55   | 189.11   | 21.99 o  |
| 8   | 8 | 4 | 3101.59  | 2823.42  | 98.95 o  |
| 9   | 8 | 4 | 1231.72  | 1279.77  | 52.77 o  |
| 10  | 8 | 4 | 4643.82  | 4921.19  | 191.31 o |
| 11  | 8 | 4 | 316.32   | 325.44   | 26.39 o  |
| 12  | 8 | 4 | 4126.19  | 4446.22  | 173.71 o |
| 13  | 8 | 4 | 1961.75  | 2088.98  | 94.55 o  |
| 14  | 8 | 4 | 351.55   | 384.81   | 26.39 o  |
| 15  | 8 | 4 | 1468.53  | 1541.45  | 72.56 o  |
| 16  | 8 | 4 | 30.19    | 35.18    | 15.39 <  |
| 17  | 8 | 4 | 181.86   | 131.93   | 19.79 o  |
| 18  | 8 | 4 | 74.81    | 43.98    | 15.39 <  |
| 19  | 8 | 4 | 227.80   | 189.11   | 30.78 o  |
| -18 | 9 | 4 | 1360.03  | 1202.81  | 61.57 o  |
| -17 | 9 | 4 | 1318.76  | 1308.36  | 72.56 o  |
| -16 | 9 | 4 | 410.26   | 400.20   | 28.59 o  |
| -15 | 9 | 4 | 1237.62  | 1231.40  | 54.97 o  |
| -14 | 9 | 4 | 818.31   | 787.22   | 41.78 o  |
| -13 | 9 | 4 | 1424.18  | 1822.91  | 72.56 o  |



## regerite.cif

|     |    |   |          |          |         |   |
|-----|----|---|----------|----------|---------|---|
| -12 | 9  | 4 | 31.57    | 41.78    | 28.59   | < |
| -11 | 9  | 4 | 16881.50 | 19878.30 | 741.04  | o |
| -10 | 9  | 4 | 104.40   | 136.33   | 17.59   | o |
| -9  | 9  | 4 | 13.21    | 39.58    | 15.39   | < |
| -8  | 9  | 4 | 4616.12  | 5310.40  | 178.11  | o |
| -7  | 9  | 4 | 18303.40 | 19108.60 | 611.30  | o |
| -6  | 9  | 4 | 0.57     | -4.40    | 13.19   | < |
| -5  | 9  | 4 | 2358.11  | 2550.75  | 105.55  | o |
| -4  | 9  | 4 | 175.76   | 178.11   | 17.59   | o |
| -3  | 9  | 4 | 35148.20 | 33282.90 | 1216.00 | o |
| -2  | 9  | 4 | 358.98   | 349.63   | 21.99   | o |
| -1  | 9  | 4 | 12564.60 | 12325.00 | 393.61  | o |
| 0   | 9  | 4 | 93.95    | 116.54   | 13.19   | o |
| 1   | 9  | 4 | 73800.10 | 72280.80 | 2273.69 | o |
| 2   | 9  | 4 | 993.58   | 820.20   | 37.38   | o |
| 3   | 9  | 4 | 14928.80 | 14504.10 | 463.97  | o |
| 4   | 9  | 4 | 104.98   | 90.16    | 13.19   | o |
| 5   | 9  | 4 | 27527.00 | 28772.90 | 905.96  | o |
| 6   | 9  | 4 | 223.75   | 204.50   | 24.19   | o |
| 7   | 9  | 4 | 15967.20 | 17450.70 | 556.33  | o |
| 8   | 9  | 4 | 257.50   | 219.89   | 61.57   | o |
| 9   | 9  | 4 | 7294.12  | 7694.03  | 318.84  | o |
| 10  | 9  | 4 | 2115.38  | 2124.16  | 79.16   | o |
| 11  | 9  | 4 | 3181.61  | 3359.96  | 118.74  | o |
| 12  | 9  | 4 | 3119.84  | 3212.63  | 123.14  | o |
| 13  | 9  | 4 | 310.08   | 272.67   | 21.99   | o |
| 14  | 9  | 4 | 3.34     | 6.60     | 13.19   | < |
| 15  | 9  | 4 | 8228.53  | 9048.57  | 343.03  | o |
| 16  | 9  | 4 | 34.97    | 52.77    | 17.59   | o |
| 17  | 9  | 4 | 1732.68  | 1668.98  | 70.37   | o |
| 18  | 9  | 4 | 200.85   | 208.90   | 28.59   | o |
| -18 | 10 | 4 | 2968.50  | 2014.21  | 169.32  | o |
| -17 | 10 | 4 | 448.99   | 415.60   | 30.78   | o |
| -16 | 10 | 4 | 398.30   | 356.23   | 28.59   | o |
| -15 | 10 | 4 | 29.12    | 54.97    | 26.39   | < |
| -14 | 10 | 4 | 1282.08  | 1537.05  | 72.56   | o |
| -13 | 10 | 4 | 1046.50  | 1251.19  | 54.97   | o |
| -12 | 10 | 4 | 7224.07  | 8725.33  | 288.06  | o |
| -11 | 10 | 4 | 65.41    | 83.56    | 17.59   | o |
| -10 | 10 | 4 | 1417.84  | 1521.66  | 72.56   | o |
| -9  | 10 | 4 | 568.26   | 628.89   | 94.55   | o |
| -8  | 10 | 4 | 13445.50 | 14559.10 | 470.57  | o |
| -7  | 10 | 4 | 1208.81  | 1143.44  | 48.38   | o |
| -6  | 10 | 4 | 165.20   | 156.12   | 17.59   | o |
| -5  | 10 | 4 | 814.76   | 800.41   | 37.38   | o |
| -4  | 10 | 4 | 9639.57  | 8813.29  | 345.23  | o |
| -3  | 10 | 4 | 27.55    | 35.18    | 10.99   | o |
| -2  | 10 | 4 | 1097.62  | 1092.87  | 46.18   | o |
| -1  | 10 | 4 | 10.15    | 10.99    | 10.99   | < |
| 0   | 10 | 4 | 5809.23  | 5574.27  | 235.29  | o |
| 1   | 10 | 4 | 3777.18  | 3755.76  | 151.73  | o |
| 2   | 10 | 4 | 19163.40 | 18040.00 | 615.70  | o |
| 3   | 10 | 4 | 43.25    | 46.18    | 13.19   | o |
| 4   | 10 | 4 | 5068.92  | 4967.37  | 167.12  | o |

## regerite.cif

|     |    |   |          |          |        |   |
|-----|----|---|----------|----------|--------|---|
| 5   | 10 | 4 | 569.30   | 591.51   | 35.18  | o |
| 6   | 10 | 4 | 25.34    | 39.58    | 123.14 | < |
| 7   | 10 | 4 | 512.11   | 490.36   | 28.59  | o |
| 8   | 10 | 4 | 3269.82  | 3487.49  | 142.93 | o |
| 9   | 10 | 4 | 502.34   | 459.58   | 28.59  | o |
| 10  | 10 | 4 | 4400.81  | 4648.52  | 158.32 | o |
| 11  | 10 | 4 | 179.40   | 202.30   | 21.99  | o |
| 12  | 10 | 4 | 12006.40 | 13066.00 | 492.56 | o |
| 13  | 10 | 4 | 596.25   | 565.12   | 193.51 | < |
| 14  | 10 | 4 | 122.64   | 138.53   | 19.79  | o |
| 15  | 10 | 4 | 1177.42  | 1165.43  | 52.77  | o |
| 16  | 10 | 4 | 472.46   | 369.42   | 28.59  | o |
| 17  | 10 | 4 | 147.07   | 134.13   | 21.99  | o |
| 18  | 10 | 4 | 537.76   | 437.59   | 39.58  | o |
| -18 | 11 | 4 | 1851.81  | 1114.85  | 116.54 | o |
| -17 | 11 | 4 | 234.21   | 211.10   | 26.39  | o |
| -16 | 11 | 4 | 841.54   | 1018.10  | 50.58  | o |
| -15 | 11 | 4 | 3286.59  | 3698.59  | 134.13 | o |
| -14 | 11 | 4 | 343.89   | 437.59   | 52.77  | o |
| -13 | 11 | 4 | 14045.00 | 17624.40 | 573.92 | o |
| -12 | 11 | 4 | 1984.73  | 2377.04  | 90.16  | o |
| -11 | 11 | 4 | 95.25    | 123.14   | 21.99  | o |
| -10 | 11 | 4 | 6.80     | 21.99    | 15.39  | < |
| -9  | 11 | 4 | 650.64   | 606.90   | 41.78  | o |
| -8  | 11 | 4 | 27.23    | 26.39    | 15.39  | < |
| -7  | 11 | 4 | 4379.74  | 4305.49  | 169.32 | o |
| -6  | 11 | 4 | 4.92     | 13.19    | 13.19  | < |
| -5  | 11 | 4 | 35.75    | 32.98    | 15.39  | < |
| -4  | 11 | 4 | 164.74   | 149.53   | 17.59  | o |
| -3  | 11 | 4 | 568.33   | 505.75   | 28.59  | o |
| -2  | 11 | 4 | 202.34   | 215.49   | 21.99  | o |
| -1  | 11 | 4 | 60.97    | 59.37    | 13.19  | o |
| 0   | 11 | 4 | 0.50     | 4.40     | 28.59  | < |
| 1   | 11 | 4 | 7868.30  | 7990.89  | 263.87 | o |
| 2   | 11 | 4 | 42.97    | 26.39    | 96.75  | < |
| 3   | 11 | 4 | 3870.73  | 3652.41  | 147.33 | o |
| 4   | 11 | 4 | 536.27   | 439.79   | 26.39  | o |
| 5   | 11 | 4 | 950.63   | 850.98   | 39.58  | o |
| 6   | 11 | 4 | 35.78    | 24.19    | 13.19  | < |
| 7   | 11 | 4 | 10682.40 | 10350.30 | 391.41 | o |
| 8   | 11 | 4 | 97.66    | 107.75   | 17.59  | o |
| 9   | 11 | 4 | 17.36    | 48.38    | 24.19  | < |
| 10  | 11 | 4 | 1185.58  | 1198.41  | 63.77  | o |
| 11  | 11 | 4 | 1623.55  | 1675.58  | 70.37  | o |
| 12  | 11 | 4 | 2409.79  | 2515.57  | 94.55  | o |
| 13  | 11 | 4 | 6731.38  | 6935.41  | 340.83 | o |
| 14  | 11 | 4 | 2.48     | -6.60    | 19.79  | < |
| 15  | 11 | 4 | 39.17    | 21.99    | 15.39  | < |
| 16  | 11 | 4 | 661.64   | 580.52   | 37.38  | o |
| 17  | 11 | 4 | 57.16    | 48.38    | 28.59  | < |
| -17 | 12 | 4 | 849.29   | 798.21   | 61.57  | o |
| -16 | 12 | 4 | 1526.91  | 1765.74  | 74.76  | o |
| -15 | 12 | 4 | 43.84    | 57.17    | 21.99  | < |
| -14 | 12 | 4 | 418.16   | 430.99   | 37.38  | o |

## regerite.cif

|     |    |   |          |          |        |   |
|-----|----|---|----------|----------|--------|---|
| -13 | 12 | 4 | 4808.67  | 6845.25  | 266.07 | o |
| -12 | 12 | 4 | 2073.77  | 2379.24  | 90.16  | o |
| -11 | 12 | 4 | 113.45   | 173.71   | 21.99  | o |
| -10 | 12 | 4 | 1345.86  | 1365.53  | 65.97  | o |
| -9  | 12 | 4 | 1116.25  | 1066.48  | 59.37  | o |
| -8  | 12 | 4 | 2386.56  | 2115.36  | 98.95  | o |
| -7  | 12 | 4 | 2883.97  | 2975.14  | 107.75 | o |
| -6  | 12 | 4 | 309.92   | 252.88   | 24.19  | o |
| -5  | 12 | 4 | 70.01    | 46.18    | 13.19  | o |
| -4  | 12 | 4 | 70.56    | 83.56    | 15.39  | o |
| -3  | 12 | 4 | 92.27    | 65.97    | 15.39  | o |
| -2  | 12 | 4 | 11594.30 | 13180.30 | 424.39 | o |
| -1  | 12 | 4 | 30.93    | 46.18    | 15.39  | < |
| 0   | 12 | 4 | 2970.64  | 3049.91  | 109.95 | o |
| 1   | 12 | 4 | 418.56   | 362.82   | 26.39  | o |
| 2   | 12 | 4 | 8201.36  | 8503.24  | 281.46 | o |
| 3   | 12 | 4 | 289.20   | 281.46   | 21.99  | o |
| 4   | 12 | 4 | 147.77   | 228.69   | 21.99  | o |
| 5   | 12 | 4 | 740.79   | 694.86   | 43.98  | o |
| 6   | 12 | 4 | 12.99    | 43.98    | 15.39  | < |
| 7   | 12 | 4 | 1767.40  | 1798.72  | 70.37  | o |
| 8   | 12 | 4 | 418.14   | 404.60   | 26.39  | o |
| 9   | 12 | 4 | 498.87   | 483.76   | 30.78  | o |
| 10  | 12 | 4 | 108.06   | 85.76    | 19.79  | o |
| 11  | 12 | 4 | 2549.03  | 2671.69  | 118.74 | o |
| 12  | 12 | 4 | 749.31   | 694.86   | 43.98  | o |
| 13  | 12 | 4 | 1130.73  | 1231.40  | 57.17  | o |
| 14  | 12 | 4 | 1272.73  | 1183.02  | 54.97  | o |
| 15  | 12 | 4 | 869.75   | 877.37   | 46.18  | o |
| 16  | 12 | 4 | 1574.61  | 1341.34  | 87.96  | o |
| 17  | 12 | 4 | 234.87   | 156.12   | 32.98  | o |
| -17 | 13 | 4 | 2138.25  | 2159.34  | 184.71 | o |
| -16 | 13 | 4 | 448.66   | 545.33   | 39.58  | o |
| -15 | 13 | 4 | 3511.46  | 4026.23  | 145.13 | o |
| -14 | 13 | 4 | 438.78   | 474.97   | 32.98  | o |
| -13 | 13 | 4 | 3074.61  | 3432.52  | 147.33 | o |
| -12 | 13 | 4 | 3012.92  | 3201.63  | 134.13 | o |
| -11 | 13 | 4 | 1827.83  | 1919.66  | 76.96  | o |
| -10 | 13 | 4 | 192.60   | 182.51   | 19.79  | o |
| -9  | 13 | 4 | 2797.73  | 3098.28  | 112.14 | o |
| -8  | 13 | 4 | 374.22   | 400.20   | 32.98  | o |
| -7  | 13 | 4 | 7869.80  | 8070.05  | 266.07 | o |
| -6  | 13 | 4 | 201.97   | 193.51   | 21.99  | o |
| -5  | 13 | 4 | 1748.37  | 1693.17  | 68.17  | o |
| -4  | 13 | 4 | 21.11    | 24.19    | 13.19  | < |
| -3  | 13 | 4 | 1683.22  | 1866.89  | 85.76  | o |
| -2  | 13 | 4 | 1228.84  | 1183.02  | 50.58  | o |
| -1  | 13 | 4 | 5378.15  | 6077.82  | 206.70 | o |
| 0   | 13 | 4 | 72.66    | 65.97    | 17.59  | o |
| 1   | 13 | 4 | 49.44    | 105.55   | 19.79  | o |
| 2   | 13 | 4 | 925.02   | 905.96   | 46.18  | o |
| 3   | 13 | 4 | 1934.62  | 1941.65  | 87.96  | o |
| 4   | 13 | 4 | 29.21    | 4.40     | 13.19  | < |
| 5   | 13 | 4 | 2006.03  | 1844.90  | 72.56  | o |

## regerite.cif

|     |    |   |          |          |        |   |
|-----|----|---|----------|----------|--------|---|
| 6   | 13 | 4 | 627.74   | 591.51   | 37.38  | o |
| 7   | 13 | 4 | 12505.50 | 13096.80 | 422.19 | o |
| 8   | 13 | 4 | 721.90   | 743.24   | 37.38  | o |
| 9   | 13 | 4 | 4817.30  | 4879.41  | 191.31 | o |
| 10  | 13 | 4 | 2175.16  | 2234.11  | 259.47 | o |
| 11  | 13 | 4 | 843.31   | 785.02   | 48.38  | o |
| 12  | 13 | 4 | 413.49   | 413.40   | 30.78  | o |
| 13  | 13 | 4 | 91.22    | 94.55    | 17.59  | o |
| 14  | 13 | 4 | 589.39   | 598.11   | 39.58  | o |
| 15  | 13 | 4 | 2880.92  | 2799.23  | 105.55 | o |
| 16  | 13 | 4 | 1848.64  | 1741.55  | 105.55 | o |
| -16 | 14 | 4 | 518.58   | 378.21   | 63.77  | o |
| -15 | 14 | 4 | 796.42   | 712.45   | 41.78  | o |
| -14 | 14 | 4 | 0.97     | 32.98    | 17.59  | < |
| -13 | 14 | 4 | 1223.18  | 1237.99  | 57.17  | o |
| -12 | 14 | 4 | 9619.85  | 10484.50 | 400.20 | o |
| -11 | 14 | 4 | 387.86   | 345.23   | 28.59  | o |
| -10 | 14 | 4 | 2991.05  | 2838.81  | 105.55 | o |
| -9  | 14 | 4 | 33.97    | 46.18    | 15.39  | < |
| -8  | 14 | 4 | 17856.10 | 18396.20 | 589.31 | o |
| -7  | 14 | 4 | 307.10   | 288.06   | 30.78  | o |
| -6  | 14 | 4 | 11638.70 | 11656.50 | 380.41 | o |
| -5  | 14 | 4 | 110.21   | 105.55   | 17.59  | o |
| -4  | 14 | 4 | 8852.56  | 8806.69  | 336.43 | o |
| -3  | 14 | 4 | 290.61   | 266.07   | 24.19  | o |
| -2  | 14 | 4 | 9107.08  | 10552.60 | 345.23 | o |
| -1  | 14 | 4 | 580.76   | 615.70   | 35.18  | o |
| 0   | 14 | 4 | 6040.47  | 6016.26  | 219.89 | o |
| 1   | 14 | 4 | 46.29    | 61.57    | 28.59  | < |
| 2   | 14 | 4 | 26250.70 | 27706.40 | 881.77 | o |
| 3   | 14 | 4 | 114.65   | 131.93   | 19.79  | o |
| 4   | 14 | 4 | 4291.45  | 4815.64  | 189.11 | o |
| 5   | 14 | 4 | 52.04    | 43.98    | 15.39  | < |
| 6   | 14 | 4 | 4071.06  | 4389.05  | 153.93 | o |
| 7   | 14 | 4 | 519.13   | 466.17   | 30.78  | o |
| 8   | 14 | 4 | 839.76   | 846.59   | 48.38  | o |
| 9   | 14 | 4 | 223.46   | 208.90   | 21.99  | o |
| 10  | 14 | 4 | 3254.23  | 3199.43  | 134.13 | o |
| 11  | 14 | 4 | 1.67     | 13.19    | 15.39  | < |
| 12  | 14 | 4 | 3040.05  | 2922.37  | 123.14 | o |
| 13  | 14 | 4 | 265.23   | 252.88   | 24.19  | o |
| 14  | 14 | 4 | 1115.14  | 936.74   | 57.17  | o |
| 15  | 14 | 4 | 242.46   | 290.26   | 43.98  | o |
| 16  | 14 | 4 | 487.11   | 435.39   | 48.38  | o |
| -15 | 15 | 4 | 1319.59  | 1189.62  | 79.16  | o |
| -14 | 15 | 4 | 3.15     | 2.20     | 15.39  | < |
| -13 | 15 | 4 | 2307.88  | 2051.60  | 114.34 | o |
| -12 | 15 | 4 | 182.30   | 173.71   | 127.54 | < |
| -11 | 15 | 4 | 2739.24  | 2876.19  | 125.34 | o |
| -10 | 15 | 4 | 68.02    | 81.36    | 17.59  | o |
| -9  | 15 | 4 | 2584.66  | 2566.14  | 98.95  | o |
| -8  | 15 | 4 | 736.39   | 734.44   | 39.58  | o |
| -7  | 15 | 4 | 2173.64  | 2434.21  | 103.35 | o |
| -6  | 15 | 4 | 770.17   | 714.65   | 43.98  | o |

## regerite.cif

|     |    |   |          |          |         |   |
|-----|----|---|----------|----------|---------|---|
| -5  | 15 | 4 | 1329.57  | 1281.97  | 68.17   | o |
| -4  | 15 | 4 | 872.10   | 837.79   | 43.98   | o |
| -3  | 15 | 4 | 2209.49  | 2368.24  | 90.16   | o |
| -2  | 15 | 4 | 445.51   | 441.98   | 30.78   | o |
| -1  | 15 | 4 | 15059.00 | 16017.00 | 516.75  | o |
| 0   | 15 | 4 | 433.16   | 450.78   | 30.78   | o |
| 1   | 15 | 4 | 315.86   | 310.05   | 26.39   | o |
| 2   | 15 | 4 | 66.08    | 70.37    | 17.59   | o |
| 3   | 15 | 4 | 7365.39  | 7830.37  | 261.67  | o |
| 4   | 15 | 4 | 120.68   | 151.73   | 19.79   | o |
| 5   | 15 | 4 | 7986.85  | 8580.20  | 283.66  | o |
| 6   | 15 | 4 | 198.87   | 235.29   | 26.39   | o |
| 7   | 15 | 4 | 13.46    | 26.39    | 15.39   | < |
| 8   | 15 | 4 | 317.61   | 303.45   | 28.59   | o |
| 9   | 15 | 4 | 1938.38  | 1781.13  | 79.16   | o |
| 10  | 15 | 4 | 1178.97  | 1213.81  | 54.97   | o |
| 11  | 15 | 4 | 4108.03  | 4864.02  | 167.12  | o |
| 12  | 15 | 4 | 658.84   | 604.70   | 37.38   | o |
| 13  | 15 | 4 | 1593.92  | 1657.99  | 72.56   | o |
| 14  | 15 | 4 | 408.00   | 327.64   | 35.18   | o |
| 15  | 15 | 4 | 37.69    | 59.37    | 30.78   | < |
| -15 | 16 | 4 | 369.83   | 224.29   | 54.97   | o |
| -14 | 16 | 4 | 600.43   | 367.22   | 32.98   | o |
| -13 | 16 | 4 | 137.78   | 151.73   | 21.99   | o |
| -12 | 16 | 4 | 216.73   | 244.08   | 26.39   | o |
| -11 | 16 | 4 | 670.13   | 664.08   | 46.18   | o |
| -10 | 16 | 4 | 7191.81  | 7091.53  | 279.26  | o |
| -9  | 16 | 4 | 136.40   | 149.53   | 19.79   | o |
| -8  | 16 | 4 | 2329.82  | 2236.31  | 87.96   | o |
| -7  | 16 | 4 | 134.23   | 134.13   | 19.79   | o |
| -6  | 16 | 4 | 52.37    | 46.18    | 17.59   | < |
| -5  | 16 | 4 | 299.15   | 281.46   | 24.19   | o |
| -4  | 16 | 4 | 1124.54  | 1095.06  | 50.58   | o |
| -3  | 16 | 4 | 19.49    | 43.98    | 17.59   | < |
| -2  | 16 | 4 | 14161.70 | 15410.10 | 496.96  | o |
| -1  | 16 | 4 | 18.16    | 81.36    | 19.79   | o |
| 0   | 16 | 4 | 30899.90 | 33971.20 | 1081.87 | o |
| 1   | 16 | 4 | 179.65   | 153.93   | 182.51  | < |
| 2   | 16 | 4 | 5115.18  | 5094.91  | 178.11  | o |
| 3   | 16 | 4 | 32.33    | 35.18    | 15.39   | < |
| 4   | 16 | 4 | 185.62   | 215.49   | 26.39   | o |
| 5   | 16 | 4 | 160.49   | 156.12   | 19.79   | o |
| 6   | 16 | 4 | 322.82   | 255.07   | 24.19   | o |
| 7   | 16 | 4 | 1.44     | 4.40     | 15.39   | < |
| 8   | 16 | 4 | 21086.10 | 23878.10 | 881.77  | o |
| 9   | 16 | 4 | 380.51   | 373.82   | 30.78   | o |
| 10  | 16 | 4 | 22795.00 | 26079.20 | 828.99  | o |
| 11  | 16 | 4 | 882.41   | 831.19   | 41.78   | o |
| 12  | 16 | 4 | 3647.93  | 3340.17  | 120.94  | o |
| 13  | 16 | 4 | 283.69   | 290.26   | 30.78   | o |
| 14  | 16 | 4 | 419.24   | 323.24   | 39.58   | o |
| -14 | 17 | 4 | 163.86   | 79.16    | 39.58   | < |
| -13 | 17 | 4 | 1441.95  | 1051.09  | 59.37   | o |
| -12 | 17 | 4 | 852.86   | 802.61   | 43.98   | o |

## regerite.cif

|     |    |   |         |         |          |
|-----|----|---|---------|---------|----------|
| -11 | 17 | 4 | 2754.82 | 2489.18 | 125.34 o |
| -10 | 17 | 4 | 23.35   | 35.18   | 50.58 <  |
| -9  | 17 | 4 | 539.74  | 490.36  | 35.18 o  |
| -8  | 17 | 4 | 82.51   | 103.35  | 19.79 o  |
| -7  | 17 | 4 | 259.11  | 299.05  | 28.59 o  |
| -6  | 17 | 4 | 93.92   | 85.76   | 17.59 o  |
| -5  | 17 | 4 | 27.91   | 39.58   | 37.38 <  |
| -4  | 17 | 4 | 168.96  | 184.71  | 21.99 o  |
| -3  | 17 | 4 | 432.80  | 452.98  | 35.18 o  |
| -2  | 17 | 4 | 1615.71 | 1789.92 | 74.76 o  |
| -1  | 17 | 4 | 3219.63 | 3362.15 | 125.34 o |
| 0   | 17 | 4 | 664.48  | 763.03  | 41.78 o  |
| 1   | 17 | 4 | 1957.49 | 2126.36 | 85.76 o  |
| 2   | 17 | 4 | 506.01  | 543.13  | 35.18 o  |
| 3   | 17 | 4 | 376.23  | 393.61  | 30.78 o  |
| 4   | 17 | 4 | 167.95  | 178.11  | 26.39 o  |
| 5   | 17 | 4 | 517.79  | 448.58  | 37.38 o  |
| 6   | 17 | 4 | 969.33  | 1013.70 | 57.17 o  |
| 7   | 17 | 4 | 391.60  | 461.77  | 32.98 o  |
| 8   | 17 | 4 | 2352.04 | 2484.78 | 96.75 o  |
| 9   | 17 | 4 | 2363.81 | 2464.99 | 96.75 o  |
| 10  | 17 | 4 | 186.21  | 160.52  | 19.79 o  |
| 11  | 17 | 4 | 2985.51 | 2667.29 | 103.35 o |
| 12  | 17 | 4 | 96.39   | 98.95   | 21.99 o  |
| 13  | 17 | 4 | 1638.78 | 1427.10 | 94.55 o  |
| -13 | 18 | 4 | 77.58   | -2.20   | 28.59 <  |
| -12 | 18 | 4 | 84.80   | 79.16   | 19.79 o  |
| -11 | 18 | 4 | 1232.13 | 1007.11 | 61.57 o  |
| -10 | 18 | 4 | 2741.36 | 2854.20 | 107.75 o |
| -9  | 18 | 4 | 2765.52 | 2871.79 | 109.95 o |
| -8  | 18 | 4 | 6085.75 | 6152.59 | 211.10 o |
| -7  | 18 | 4 | 101.08  | 81.36   | 17.59 o  |
| -6  | 18 | 4 | 7926.82 | 8109.63 | 270.47 o |
| -5  | 18 | 4 | 606.23  | 633.29  | 37.38 o  |
| -4  | 18 | 4 | 817.83  | 833.39  | 50.58 o  |
| -3  | 18 | 4 | 1152.40 | 1185.22 | 63.77 o  |
| -2  | 18 | 4 | 1515.03 | 1413.91 | 63.77 o  |
| -1  | 18 | 4 | 858.10  | 897.16  | 46.18 o  |
| 0   | 18 | 4 | 0.90    | 21.99   | 17.59 <  |
| 1   | 18 | 4 | 246.13  | 288.06  | 26.39 o  |
| 2   | 18 | 4 | 326.58  | 391.41  | 35.18 o  |
| 3   | 18 | 4 | 1355.99 | 1515.06 | 96.75 o  |
| 4   | 18 | 4 | 458.20  | 380.41  | 28.59 o  |
| 5   | 18 | 4 | 32.07   | 61.57   | 17.59 o  |
| 6   | 18 | 4 | 1900.40 | 1726.16 | 72.56 o  |
| 7   | 18 | 4 | 279.53  | 285.86  | 26.39 o  |
| 8   | 18 | 4 | 3363.52 | 3250.01 | 120.94 o |
| 9   | 18 | 4 | 1315.73 | 1209.41 | 59.37 o  |
| 10  | 18 | 4 | 488.95  | 369.42  | 28.59 o  |
| 11  | 18 | 4 | 7.03    | 26.39   | 19.79 <  |
| 12  | 18 | 4 | 132.28  | 76.96   | 26.39 <  |
| -12 | 19 | 4 | 1632.53 | 1013.70 | 105.55 o |
| -11 | 19 | 4 | 1710.79 | 1270.98 | 92.35 o  |
| -10 | 19 | 4 | 4.99    | 0.00    | 15.39 <  |

## regerite.cif

|     |    |   |          |          |        |   |
|-----|----|---|----------|----------|--------|---|
| -9  | 19 | 4 | 248.51   | 180.31   | 21.99  | o |
| -8  | 19 | 4 | 91.18    | 92.35    | 17.59  | o |
| -7  | 19 | 4 | 8317.60  | 8668.16  | 343.03 | o |
| -6  | 19 | 4 | 882.71   | 875.17   | 52.77  | o |
| -5  | 19 | 4 | 14530.10 | 17261.60 | 646.48 | o |
| -4  | 19 | 4 | 1924.38  | 2071.39  | 98.95  | o |
| -3  | 19 | 4 | 5328.24  | 5928.30  | 294.66 | o |
| -2  | 19 | 4 | 80.56    | 107.75   | 21.99  | o |
| -1  | 19 | 4 | 77.39    | 50.58    | 19.79  | < |
| 0   | 19 | 4 | 105.91   | 94.55    | 19.79  | o |
| 1   | 19 | 4 | 774.64   | 861.98   | 52.77  | o |
| 2   | 19 | 4 | 0.62     | 13.19    | 17.59  | < |
| 3   | 19 | 4 | 8244.93  | 8874.86  | 296.86 | o |
| 4   | 19 | 4 | 1163.03  | 1095.06  | 52.77  | o |
| 5   | 19 | 4 | 2441.00  | 2625.51  | 103.35 | o |
| 6   | 19 | 4 | 708.45   | 756.43   | 43.98  | o |
| 7   | 19 | 4 | 28.85    | 32.98    | 15.39  | < |
| 8   | 19 | 4 | 60.30    | 61.57    | 19.79  | o |
| 9   | 19 | 4 | 8.77     | 6.60     | 26.39  | < |
| 10  | 19 | 4 | 53.24    | 26.39    | 21.99  | < |
| 11  | 19 | 4 | 197.28   | 202.30   | 30.78  | o |
| -11 | 20 | 4 | 30.05    | -6.60    | 30.78  | < |
| -10 | 20 | 4 | 4901.65  | 2370.44  | 195.70 | o |
| -9  | 20 | 4 | 467.17   | 334.24   | 39.58  | o |
| -8  | 20 | 4 | 1686.50  | 1422.70  | 81.36  | o |
| -7  | 20 | 4 | 245.65   | 235.29   | 24.19  | o |
| -6  | 20 | 4 | 772.46   | 752.03   | 39.58  | o |
| -5  | 20 | 4 | 8.72     | 4.40     | 17.59  | < |
| -4  | 20 | 4 | 536.99   | 466.17   | 32.98  | o |
| -3  | 20 | 4 | 227.86   | 204.50   | 21.99  | o |
| -2  | 20 | 4 | 1035.29  | 1123.65  | 54.97  | o |
| -1  | 20 | 4 | 24.02    | 21.99    | 63.77  | < |
| 0   | 20 | 4 | 3837.31  | 4257.12  | 156.12 | o |
| 1   | 20 | 4 | 0.41     | -26.39   | 235.29 | < |
| 2   | 20 | 4 | 1561.12  | 1521.66  | 68.17  | o |
| 3   | 20 | 4 | 412.50   | 354.03   | 28.59  | o |
| 4   | 20 | 4 | 3895.92  | 3881.10  | 142.93 | o |
| 5   | 20 | 4 | 7.78     | 4.40     | 15.39  | < |
| 6   | 20 | 4 | 1424.08  | 1413.91  | 72.56  | o |
| 7   | 20 | 4 | 15.93    | 48.38    | 28.59  | < |
| 8   | 20 | 4 | 484.01   | 461.77   | 41.78  | o |
| 9   | 20 | 4 | 49.00    | 48.38    | 21.99  | < |
| 10  | 20 | 4 | 1143.72  | 916.95   | 68.17  | o |
| -9  | 21 | 4 | 542.42   | 233.09   | 37.38  | o |
| -8  | 21 | 4 | 1201.94  | 736.64   | 98.95  | o |
| -7  | 21 | 4 | 404.33   | 424.39   | 43.98  | o |
| -6  | 21 | 4 | 507.74   | 503.55   | 39.58  | o |
| -5  | 21 | 4 | 180.43   | 158.32   | 24.19  | o |
| -4  | 21 | 4 | 1.71     | 28.59    | 26.39  | < |
| -3  | 21 | 4 | 2219.63  | 2005.42  | 83.56  | o |
| -2  | 21 | 4 | 82.11    | 72.56    | 17.59  | o |
| -1  | 21 | 4 | 1872.91  | 1983.43  | 96.75  | o |
| 0   | 21 | 4 | 24.68    | 17.59    | 406.80 | < |
| 1   | 21 | 4 | 1349.51  | 1317.16  | 72.56  | o |

## regerite.cif

|     |    |   |          |          |           |
|-----|----|---|----------|----------|-----------|
| 2   | 21 | 4 | 231.00   | 131.93   | 24.19 o   |
| 3   | 21 | 4 | 131.65   | 123.14   | 19.79 o   |
| 4   | 21 | 4 | 35.60    | 41.78    | 19.79 <   |
| 5   | 21 | 4 | 934.41   | 883.97   | 72.56 o   |
| 6   | 21 | 4 | 204.37   | 248.48   | 35.18 o   |
| 7   | 21 | 4 | 0.91     | -2.20    | 21.99 <   |
| 8   | 21 | 4 | 6.63     | 19.79    | 21.99 <   |
| -8  | 22 | 4 | 716.14   | 417.80   | 76.96 o   |
| -7  | 22 | 4 | 456.61   | 321.04   | 39.58 o   |
| -6  | 22 | 4 | 4307.34  | 3641.42  | 189.11 o  |
| -5  | 22 | 4 | 14.92    | 4.40     | 21.99 <   |
| -4  | 22 | 4 | 1319.81  | 919.15   | 68.17 o   |
| -3  | 22 | 4 | 573.35   | 376.02   | 41.78 o   |
| -2  | 22 | 4 | 2584.77  | 2330.86  | 109.95 o  |
| -1  | 22 | 4 | 154.70   | 153.93   | 26.39 o   |
| 0   | 22 | 4 | 1744.54  | 1636.00  | 83.56 o   |
| 1   | 22 | 4 | 336.24   | 301.25   | 32.98 o   |
| 2   | 22 | 4 | 1012.41  | 758.63   | 61.57 o   |
| 3   | 22 | 4 | 84.40    | 70.37    | 24.19 <   |
| 4   | 22 | 4 | 66.18    | 54.97    | 21.99 <   |
| 5   | 22 | 4 | 2046.23  | 1897.67  | 116.54 o  |
| 6   | 22 | 4 | 182.44   | 206.70   | 32.98 o   |
| -5  | 23 | 4 | 6216.80  | 4886.01  | 466.17 o  |
| -4  | 23 | 4 | 28.49    | 10.99    | 24.19 <   |
| -3  | 23 | 4 | 881.71   | 441.98   | 46.18 o   |
| -2  | 23 | 4 | 313.21   | 268.27   | 37.38 o   |
| -1  | 23 | 4 | 115.82   | 149.53   | 32.98 o   |
| 0   | 23 | 4 | 59.11    | 50.58    | 182.51 <  |
| 1   | 23 | 4 | 4981.05  | 4782.66  | 272.67 o  |
| 2   | 23 | 4 | 128.10   | 90.16    | 26.39 o   |
| 3   | 23 | 4 | 14553.00 | 16678.80 | 877.37 o  |
| 4   | 23 | 4 | 534.65   | 448.58   | 46.18 o   |
| -19 | 1  | 5 | 593.28   | 450.78   | 28.59 o   |
| -18 | 1  | 5 | 1093.84  | 905.96   | 41.78 o   |
| -17 | 1  | 5 | 1725.47  | 1633.80  | 65.97 o   |
| -16 | 1  | 5 | 1392.46  | 1284.17  | 52.77 o   |
| -15 | 1  | 5 | 46.92    | 61.57    | 13.19 o   |
| -14 | 1  | 5 | 1433.70  | 1442.49  | 57.17 o   |
| -13 | 1  | 5 | 2.92     | 0.00     | 8.80 <    |
| -12 | 1  | 5 | 6211.40  | 5708.41  | 189.11 o  |
| -11 | 1  | 5 | 551.76   | 463.97   | 26.39 o   |
| -10 | 1  | 5 | 25270.00 | 25437.20 | 802.61 o  |
| -9  | 1  | 5 | 291.98   | 211.10   | 17.59 o   |
| -8  | 1  | 5 | 263.94   | 246.28   | 21.99 o   |
| -7  | 1  | 5 | 48.91    | 54.97    | 10.99 o   |
| -6  | 1  | 5 | 5776.02  | 6069.03  | 226.49 o  |
| -5  | 1  | 5 | 1042.84  | 965.33   | 37.38 o   |
| -4  | 1  | 5 | 14430.90 | 13639.90 | 433.19 o  |
| -3  | 1  | 5 | 1284.73  | 1213.81  | 43.98 o   |
| -2  | 1  | 5 | 10371.30 | 10302.00 | 323.24 o  |
| -1  | 1  | 5 | 1.59     | 0.00     | 6.60 <    |
| 0   | 1  | 5 | 23211.80 | 25822.00 | 1150.04 o |
| 1   | 1  | 5 | 0.67     | 13.19    | 107.75 <  |
| 2   | 1  | 5 | 6986.92  | 6979.38  | 222.09 o  |



## regerite.cif

|     |   |   |          |          |           |
|-----|---|---|----------|----------|-----------|
| 3   | 1 | 5 | 273.82   | 248.48   | 13.19 o   |
| 4   | 1 | 5 | 9128.62  | 9644.48  | 305.65 o  |
| 5   | 1 | 5 | 1426.59  | 1270.98  | 46.18 o   |
| 6   | 1 | 5 | 11436.00 | 11561.90 | 367.22 o  |
| 7   | 1 | 5 | 164.31   | 149.53   | 15.39 o   |
| 8   | 1 | 5 | 9931.98  | 10385.50 | 384.81 o  |
| 9   | 1 | 5 | 565.20   | 591.51   | 28.59 o   |
| 10  | 1 | 5 | 71.20    | 101.15   | 13.19 o   |
| 11  | 1 | 5 | 3193.62  | 3311.58  | 114.34 o  |
| 12  | 1 | 5 | 4876.93  | 5838.14  | 193.51 o  |
| 13  | 1 | 5 | 1519.46  | 1642.60  | 72.56 o   |
| 14  | 1 | 5 | 9021.95  | 10075.50 | 382.61 o  |
| 15  | 1 | 5 | 750.50   | 690.46   | 35.18 o   |
| 16  | 1 | 5 | 4628.81  | 4872.81  | 193.51 o  |
| 17  | 1 | 5 | 34.88    | 19.79    | 10.99 <   |
| 18  | 1 | 5 | 87.70    | 94.55    | 15.39 o   |
| 19  | 1 | 5 | 165.10   | 175.91   | 19.79 o   |
| -19 | 2 | 5 | 1343.89  | 1103.86  | 48.38 o   |
| -18 | 2 | 5 | 51.42    | 59.37    | 13.19 o   |
| -17 | 2 | 5 | 4317.70  | 4107.59  | 142.93 o  |
| -16 | 2 | 5 | 667.98   | 670.67   | 35.18 o   |
| -15 | 2 | 5 | 4918.65  | 4888.21  | 164.92 o  |
| -14 | 2 | 5 | 30.02    | 43.98    | 13.19 o   |
| -13 | 2 | 5 | 1257.06  | 1174.23  | 48.38 o   |
| -12 | 2 | 5 | 673.26   | 587.11   | 30.78 o   |
| -11 | 2 | 5 | 241.99   | 268.27   | 19.79 o   |
| -10 | 2 | 5 | 754.02   | 760.83   | 35.18 o   |
| -9  | 2 | 5 | 5003.53  | 4923.39  | 160.52 o  |
| -8  | 2 | 5 | 2391.90  | 2319.86  | 96.75 o   |
| -7  | 2 | 5 | 5305.13  | 5079.51  | 167.12 o  |
| -6  | 2 | 5 | 1081.12  | 952.13   | 37.38 o   |
| -5  | 2 | 5 | 146.03   | 83.56    | 10.99 o   |
| -4  | 2 | 5 | 48.83    | -4.40    | 6.60 <    |
| -3  | 2 | 5 | 2059.84  | 2434.21  | 81.36 o   |
| -2  | 2 | 5 | 148.70   | 173.71   | 10.99 o   |
| -1  | 2 | 5 | 20460.30 | 23733.00 | 1057.68 o |
| 0   | 2 | 5 | 1640.42  | 1594.22  | 79.16 o   |
| 1   | 2 | 5 | 2835.13  | 2909.18  | 136.33 o  |
| 2   | 2 | 5 | 225.29   | 162.72   | 13.19 o   |
| 3   | 2 | 5 | 1451.84  | 1510.66  | 50.58 o   |
| 4   | 2 | 5 | 353.52   | 277.06   | 13.19 o   |
| 5   | 2 | 5 | 130.03   | 184.71   | 13.19 o   |
| 6   | 2 | 5 | 592.11   | 567.32   | 28.59 o   |
| 7   | 2 | 5 | 526.28   | 532.14   | 26.39 o   |
| 8   | 2 | 5 | 216.40   | 200.10   | 15.39 o   |
| 9   | 2 | 5 | 4772.11  | 5026.74  | 164.92 o  |
| 10  | 2 | 5 | 215.59   | 193.51   | 17.59 o   |
| 11  | 2 | 5 | 5834.38  | 6273.53  | 206.70 o  |
| 12  | 2 | 5 | 57.91    | 76.96    | 13.19 o   |
| 13  | 2 | 5 | 6004.06  | 6554.99  | 250.68 o  |
| 14  | 2 | 5 | 117.86   | 87.96    | 17.59 o   |
| 15  | 2 | 5 | 69.54    | 70.37    | 13.19 o   |
| 16  | 2 | 5 | 510.21   | 505.75   | 30.78 o   |
| 17  | 2 | 5 | 165.28   | 125.34   | 17.59 o   |

## regerite.cif

|     |   |   |          |          |         |   |
|-----|---|---|----------|----------|---------|---|
| 18  | 2 | 5 | 238.68   | 255.07   | 21.99   | o |
| 19  | 2 | 5 | 2.98     | 19.79    | 10.99   | < |
| -19 | 3 | 5 | 110.56   | 94.55    | 15.39   | o |
| -18 | 3 | 5 | 443.78   | 430.99   | 26.39   | o |
| -17 | 3 | 5 | 811.64   | 712.45   | 37.38   | o |
| -16 | 3 | 5 | 3347.25  | 3315.98  | 118.74  | o |
| -15 | 3 | 5 | 1623.16  | 1668.98  | 65.97   | o |
| -14 | 3 | 5 | 6015.89  | 6229.55  | 206.70  | o |
| -13 | 3 | 5 | 2.52     | 6.60     | 13.19   | < |
| -12 | 3 | 5 | 476.13   | 448.58   | 30.78   | o |
| -11 | 3 | 5 | 0.22     | 4.40     | 10.99   | < |
| -10 | 3 | 5 | 632.20   | 527.74   | 28.59   | o |
| -9  | 3 | 5 | 52.59    | 79.16    | 13.19   | o |
| -8  | 3 | 5 | 11046.20 | 10917.70 | 404.60  | o |
| -7  | 3 | 5 | 1369.16  | 1367.73  | 59.37   | o |
| -6  | 3 | 5 | 41724.70 | 41517.90 | 1301.76 | o |
| -5  | 3 | 5 | 378.14   | 332.04   | 19.79   | o |
| -4  | 3 | 5 | 30430.30 | 30747.60 | 967.53  | o |
| -3  | 3 | 5 | 62.00    | 46.18    | 8.80    | o |
| -2  | 3 | 5 | 7716.80  | 6711.12  | 215.49  | o |
| -1  | 3 | 5 | 898.31   | 802.61   | 50.58   | o |
| 0   | 3 | 5 | 45322.00 | 44183.00 | 1970.24 | o |
| 1   | 3 | 5 | 0.10     | -6.60    | 13.19   | < |
| 2   | 3 | 5 | 65173.10 | 65228.90 | 2895.98 | o |
| 3   | 3 | 5 | 318.58   | 292.46   | 13.19   | o |
| 4   | 3 | 5 | 26643.90 | 25087.50 | 789.41  | o |
| 5   | 3 | 5 | 9.11     | 4.40     | 6.60    | < |
| 6   | 3 | 5 | 52448.60 | 54155.10 | 1701.97 | o |
| 7   | 3 | 5 | 1173.32  | 1002.71  | 43.98   | o |
| 8   | 3 | 5 | 12866.70 | 13382.60 | 424.39  | o |
| 9   | 3 | 5 | 2274.56  | 2366.04  | 83.56   | o |
| 10  | 3 | 5 | 0.97     | 13.19    | 10.99   | < |
| 11  | 3 | 5 | 1570.45  | 1679.98  | 63.77   | o |
| 12  | 3 | 5 | 6963.13  | 7194.88  | 274.86  | o |
| 13  | 3 | 5 | 6024.95  | 7051.95  | 325.44  | o |
| 14  | 3 | 5 | 3299.57  | 3746.97  | 151.73  | o |
| 15  | 3 | 5 | 583.28   | 598.11   | 35.18   | o |
| 16  | 3 | 5 | 6565.46  | 7274.04  | 241.88  | o |
| 17  | 3 | 5 | 357.03   | 369.42   | 35.18   | o |
| 18  | 3 | 5 | 258.95   | 244.08   | 21.99   | o |
| 19  | 3 | 5 | 250.47   | 230.89   | 24.19   | o |
| -19 | 4 | 5 | 2270.20  | 2036.20  | 411.20  | o |
| -18 | 4 | 5 | 54.47    | 70.37    | 15.39   | o |
| -17 | 4 | 5 | 835.89   | 752.03   | 46.18   | o |
| -16 | 4 | 5 | 677.90   | 631.09   | 35.18   | o |
| -15 | 4 | 5 | 497.93   | 439.79   | 26.39   | o |
| -14 | 4 | 5 | 621.49   | 576.12   | 32.98   | o |
| -13 | 4 | 5 | 2393.21  | 2256.10  | 96.75   | o |
| -12 | 4 | 5 | 113.68   | 96.75    | 15.39   | o |
| -11 | 4 | 5 | 12877.10 | 13604.70 | 433.19  | o |
| -10 | 4 | 5 | 323.05   | 250.68   | 19.79   | o |
| -9  | 4 | 5 | 1796.53  | 2181.33  | 76.96   | o |
| -8  | 4 | 5 | 59.17    | 79.16    | 15.39   | o |
| -7  | 4 | 5 | 253.88   | 345.23   | 19.79   | o |

## regerite.cif

|     |   |   |          |          |           |
|-----|---|---|----------|----------|-----------|
| -6  | 4 | 5 | 494.49   | 400.20   | 24.19 o   |
| -5  | 4 | 5 | 278.79   | 233.09   | 15.39 o   |
| -4  | 4 | 5 | 843.97   | 727.84   | 35.18 o   |
| -3  | 4 | 5 | 50910.90 | 46239.00 | 1453.49 o |
| -2  | 4 | 5 | 332.84   | 321.04   | 17.59 o   |
| -1  | 4 | 5 | 7592.87  | 7120.11  | 239.68 o  |
| 0   | 4 | 5 | 1071.44  | 989.52   | 57.17 o   |
| 1   | 4 | 5 | 8555.42  | 9325.64  | 424.39 o  |
| 2   | 4 | 5 | 2552.90  | 2302.27  | 76.96 o   |
| 3   | 4 | 5 | 10273.00 | 8883.65  | 281.46 o  |
| 4   | 4 | 5 | 1687.79  | 1616.21  | 57.17 o   |
| 5   | 4 | 5 | 13572.70 | 12852.70 | 406.80 o  |
| 6   | 4 | 5 | 1206.61  | 1332.55  | 48.38 o   |
| 7   | 4 | 5 | 12988.30 | 13182.50 | 483.76 o  |
| 8   | 4 | 5 | 2640.05  | 2662.90  | 92.35 o   |
| 9   | 4 | 5 | 1840.34  | 1930.66  | 70.37 o   |
| 10  | 4 | 5 | 429.79   | 382.61   | 21.99 o   |
| 11  | 4 | 5 | 6682.91  | 6858.44  | 224.29 o  |
| 12  | 4 | 5 | 2947.92  | 2898.18  | 101.15 o  |
| 13  | 4 | 5 | 10124.60 | 10737.30 | 400.20 o  |
| 14  | 4 | 5 | 56.21    | 76.96    | 19.79 o   |
| 15  | 4 | 5 | 132.31   | 112.14   | 15.39 o   |
| 16  | 4 | 5 | 1141.40  | 1134.64  | 59.37 o   |
| 17  | 4 | 5 | 1434.16  | 1376.53  | 63.77 o   |
| 18  | 4 | 5 | 637.63   | 631.09   | 35.18 o   |
| 19  | 4 | 5 | 20.93    | 54.97    | 15.39 o   |
| -19 | 5 | 5 | 1279.55  | 1123.65  | 57.17 o   |
| -18 | 5 | 5 | 107.05   | 90.16    | 15.39 o   |
| -17 | 5 | 5 | 165.87   | 120.94   | 17.59 o   |
| -16 | 5 | 5 | 909.64   | 853.18   | 46.18 o   |
| -15 | 5 | 5 | 31.76    | 54.97    | 15.39 o   |
| -14 | 5 | 5 | 763.44   | 747.63   | 39.58 o   |
| -13 | 5 | 5 | 395.19   | 354.03   | 26.39 o   |
| -12 | 5 | 5 | 367.48   | 501.36   | 153.93 o  |
| -11 | 5 | 5 | 1111.81  | 1095.06  | 48.38 o   |
| -10 | 5 | 5 | 4058.92  | 4743.08  | 158.32 o  |
| -9  | 5 | 5 | 921.10   | 1077.47  | 43.98 o   |
| -8  | 5 | 5 | 1119.86  | 1264.38  | 50.58 o   |
| -7  | 5 | 5 | 439.47   | 444.18   | 26.39 o   |
| -6  | 5 | 5 | 1861.02  | 1897.67  | 103.35 o  |
| -5  | 5 | 5 | 0.28     | 6.60     | 10.99 <   |
| -4  | 5 | 5 | 13737.00 | 13160.60 | 419.99 o  |
| -3  | 5 | 5 | 21.38    | 39.58    | 8.80 o    |
| -2  | 5 | 5 | 2248.14  | 1961.44  | 68.17 o   |
| -1  | 5 | 5 | 8.00     | 32.98    | 8.80 o    |
| 0   | 5 | 5 | 2500.77  | 2662.90  | 90.16 o   |
| 1   | 5 | 5 | 286.45   | 263.87   | 15.39 o   |
| 2   | 5 | 5 | 348.42   | 360.62   | 17.59 o   |
| 3   | 5 | 5 | 66.18    | 94.55    | 10.99 o   |
| 4   | 5 | 5 | 467.24   | 538.74   | 24.19 o   |
| 5   | 5 | 5 | 152.74   | 98.95    | 10.99 o   |
| 6   | 5 | 5 | 5632.62  | 6167.98  | 202.30 o  |
| 7   | 5 | 5 | 860.13   | 965.33   | 43.98 o   |
| 8   | 5 | 5 | 1247.54  | 1218.20  | 48.38 o   |

## regerite.cif

|     |   |   |          |          |           |
|-----|---|---|----------|----------|-----------|
| 9   | 5 | 5 | 74.64    | 61.57    | 10.99 o   |
| 10  | 5 | 5 | 2829.76  | 3012.53  | 103.35 o  |
| 11  | 5 | 5 | 24.85    | 28.59    | 13.19 <   |
| 12  | 5 | 5 | 431.06   | 395.81   | 24.19 o   |
| 13  | 5 | 5 | 2052.73  | 2095.57  | 81.36 o   |
| 14  | 5 | 5 | 195.76   | 180.31   | 21.99 o   |
| 15  | 5 | 5 | 73.64    | 92.35    | 15.39 o   |
| 16  | 5 | 5 | 547.73   | 525.54   | 30.78 o   |
| 17  | 5 | 5 | 1791.88  | 1572.23  | 70.37 o   |
| 18  | 5 | 5 | 1.15     | -4.40    | 13.19 <   |
| 19  | 5 | 5 | 82.40    | 76.96    | 21.99 o   |
| -19 | 6 | 5 | 147.16   | 114.34   | 17.59 o   |
| -18 | 6 | 5 | 2.06     | 6.60     | 13.19 <   |
| -17 | 6 | 5 | 923.05   | 798.21   | 48.38 o   |
| -16 | 6 | 5 | 2221.11  | 2185.73  | 85.76 o   |
| -15 | 6 | 5 | 1636.46  | 1559.04  | 65.97 o   |
| -14 | 6 | 5 | 499.62   | 510.15   | 30.78 o   |
| -13 | 6 | 5 | 2085.15  | 2295.68  | 101.15 o  |
| -12 | 6 | 5 | 31.59    | 8.80     | 17.59 <   |
| -11 | 6 | 5 | 35.08    | 63.77    | 15.39 o   |
| -10 | 6 | 5 | 7077.97  | 8395.49  | 270.47 o  |
| -9  | 6 | 5 | 84.18    | 103.35   | 17.59 o   |
| -8  | 6 | 5 | 1132.49  | 1205.01  | 48.38 o   |
| -7  | 6 | 5 | 91.28    | 125.34   | 21.99 o   |
| -6  | 6 | 5 | 855.22   | 811.40   | 39.58 o   |
| -5  | 6 | 5 | 173.61   | 191.31   | 17.59 o   |
| -4  | 6 | 5 | 1839.51  | 1620.61  | 70.37 o   |
| -3  | 6 | 5 | 2315.60  | 1932.85  | 70.37 o   |
| -2  | 6 | 5 | 475.67   | 516.75   | 24.19 o   |
| -1  | 6 | 5 | 8795.31  | 8261.36  | 266.07 o  |
| 0   | 6 | 5 | 34.37    | 10.99    | 8.80 <    |
| 1   | 6 | 5 | 34907.90 | 34263.60 | 1079.67 o |
| 2   | 6 | 5 | 937.18   | 745.43   | 30.78 o   |
| 3   | 6 | 5 | 9425.19  | 9253.07  | 296.86 o  |
| 4   | 6 | 5 | 36.87    | 43.98    | 8.80 o    |
| 5   | 6 | 5 | 10178.00 | 10552.60 | 338.63 o  |
| 6   | 6 | 5 | 511.70   | 455.18   | 24.19 o   |
| 7   | 6 | 5 | 1835.84  | 1686.57  | 61.57 o   |
| 8   | 6 | 5 | 532.54   | 481.56   | 30.78 o   |
| 9   | 6 | 5 | 913.40   | 1004.91  | 41.78 o   |
| 10  | 6 | 5 | 2139.19  | 2148.35  | 79.16 o   |
| 11  | 6 | 5 | 5487.92  | 5906.31  | 195.70 o  |
| 12  | 6 | 5 | 123.04   | 112.14   | 17.59 o   |
| 13  | 6 | 5 | 67.30    | 63.77    | 13.19 o   |
| 14  | 6 | 5 | 3.00     | 32.98    | 15.39 <   |
| 15  | 6 | 5 | 56.21    | 79.16    | 15.39 o   |
| 16  | 6 | 5 | 1603.68  | 1719.56  | 79.16 o   |
| 17  | 6 | 5 | 1779.20  | 1629.40  | 68.17 o   |
| 18  | 6 | 5 | 34.16    | 32.98    | 13.19 <   |
| -19 | 7 | 5 | 157.34   | 200.10   | 39.58 o   |
| -18 | 7 | 5 | 352.00   | 310.05   | 24.19 o   |
| -17 | 7 | 5 | 38.18    | 39.58    | 15.39 <   |
| -16 | 7 | 5 | 2095.13  | 2095.57  | 118.74 o  |
| -15 | 7 | 5 | 1043.50  | 1110.46  | 50.58 o   |

## regerite.cif

|     |   |   |          |          |        |   |
|-----|---|---|----------|----------|--------|---|
| -14 | 7 | 5 | 5865.28  | 6565.99  | 219.89 | o |
| -13 | 7 | 5 | 48.53    | 83.56    | 15.39  | o |
| -12 | 7 | 5 | 1540.91  | 1668.98  | 65.97  | o |
| -11 | 7 | 5 | 335.01   | 367.22   | 466.17 | < |
| -10 | 7 | 5 | 12754.20 | 14992.30 | 485.96 | o |
| -9  | 7 | 5 | 1061.96  | 1158.83  | 50.58  | o |
| -8  | 7 | 5 | 112.53   | 92.35    | 15.39  | o |
| -7  | 7 | 5 | 393.38   | 426.59   | 30.78  | o |
| -6  | 7 | 5 | 8950.35  | 9400.40  | 327.64 | o |
| -5  | 7 | 5 | 1604.16  | 1477.68  | 68.17  | o |
| -4  | 7 | 5 | 4043.07  | 4090.00  | 138.53 | o |
| -3  | 7 | 5 | 1518.05  | 1435.90  | 61.57  | o |
| -2  | 7 | 5 | 362.51   | 290.26   | 19.79  | o |
| -1  | 7 | 5 | 64.72    | 76.96    | 10.99  | o |
| 0   | 7 | 5 | 5905.55  | 5616.05  | 184.71 | o |
| 1   | 7 | 5 | 266.20   | 266.07   | 17.59  | o |
| 2   | 7 | 5 | 2288.37  | 2425.41  | 96.75  | o |
| 3   | 7 | 5 | 2.25     | 0.00     | 8.80   | < |
| 4   | 7 | 5 | 772.38   | 727.84   | 35.18  | o |
| 5   | 7 | 5 | 287.31   | 215.49   | 17.59  | o |
| 6   | 7 | 5 | 9225.67  | 9521.34  | 354.03 | o |
| 7   | 7 | 5 | 74.16    | 46.18    | 15.39  | < |
| 8   | 7 | 5 | 2902.53  | 2869.60  | 109.95 | o |
| 9   | 7 | 5 | 48.51    | 35.18    | 10.99  | o |
| 10  | 7 | 5 | 4510.91  | 4668.31  | 182.51 | o |
| 11  | 7 | 5 | 144.68   | 129.74   | 15.39  | o |
| 12  | 7 | 5 | 1243.50  | 1121.45  | 48.38  | o |
| 13  | 7 | 5 | 300.89   | 316.64   | 24.19  | o |
| 14  | 7 | 5 | 18.83    | 28.59    | 13.19  | < |
| 15  | 7 | 5 | 1672.72  | 1567.83  | 74.76  | o |
| 16  | 7 | 5 | 94.80    | 48.38    | 15.39  | o |
| 17  | 7 | 5 | 87.27    | 83.56    | 19.79  | o |
| 18  | 7 | 5 | 62.19    | 65.97    | 17.59  | o |
| -19 | 8 | 5 | 1819.69  | 277.06   | 61.57  | o |
| -18 | 8 | 5 | 495.10   | 387.01   | 30.78  | o |
| -17 | 8 | 5 | 2862.06  | 2856.40  | 107.75 | o |
| -16 | 8 | 5 | 13.19    | 43.98    | 17.59  | < |
| -15 | 8 | 5 | 6099.38  | 7113.52  | 239.68 | o |
| -14 | 8 | 5 | 396.65   | 415.60   | 28.59  | o |
| -13 | 8 | 5 | 297.09   | 305.65   | 24.19  | o |
| -12 | 8 | 5 | 90.23    | 90.16    | 17.59  | o |
| -11 | 8 | 5 | 3626.56  | 4908.00  | 193.51 | o |
| -10 | 8 | 5 | 1050.00  | 1253.39  | 54.97  | o |
| -9  | 8 | 5 | 239.75   | 316.64   | 24.19  | o |
| -8  | 8 | 5 | 9.50     | 30.78    | 15.39  | < |
| -7  | 8 | 5 | 17903.50 | 18591.90 | 635.49 | o |
| -6  | 8 | 5 | 728.20   | 648.68   | 37.38  | o |
| -5  | 8 | 5 | 25759.00 | 25149.10 | 958.73 | o |
| -4  | 8 | 5 | 127.07   | 147.33   | 21.99  | o |
| -3  | 8 | 5 | 28.67    | 109.95   | 57.17  | < |
| -2  | 8 | 5 | 433.85   | 433.19   | 24.19  | o |
| -1  | 8 | 5 | 899.55   | 1165.43  | 46.18  | o |
| 0   | 8 | 5 | 670.67   | 576.12   | 28.59  | o |
| 1   | 8 | 5 | 1525.38  | 1660.19  | 61.57  | o |

## regerite.cif

|     |    |   |          |          |           |
|-----|----|---|----------|----------|-----------|
| 2   | 8  | 5 | 843.10   | 815.80   | 35.18 o   |
| 3   | 8  | 5 | 31139.80 | 31913.00 | 1007.11 o |
| 4   | 8  | 5 | 23.40    | 54.97    | 10.99 o   |
| 5   | 8  | 5 | 724.40   | 732.24   | 32.98 o   |
| 6   | 8  | 5 | 5588.97  | 5444.54  | 182.51 o  |
| 7   | 8  | 5 | 8147.68  | 8274.55  | 310.05 o  |
| 8   | 8  | 5 | 203.85   | 252.88   | 21.99 o   |
| 9   | 8  | 5 | 4345.76  | 4604.55  | 153.93 o  |
| 10  | 8  | 5 | 913.79   | 930.15   | 41.78 o   |
| 11  | 8  | 5 | 8759.54  | 9206.89  | 318.84 o  |
| 12  | 8  | 5 | 859.22   | 754.23   | 46.18 o   |
| 13  | 8  | 5 | 286.36   | 270.47   | 26.39 o   |
| 14  | 8  | 5 | 453.68   | 501.36   | 30.78 o   |
| 15  | 8  | 5 | 5966.60  | 6249.34  | 213.30 o  |
| 16  | 8  | 5 | 205.48   | 224.29   | 24.19 o   |
| 17  | 8  | 5 | 1775.35  | 1512.86  | 63.77 o   |
| 18  | 8  | 5 | 1167.74  | 686.06   | 54.97 o   |
| -18 | 9  | 5 | 524.64   | 409.00   | 32.98 o   |
| -17 | 9  | 5 | 875.22   | 813.60   | 43.98 o   |
| -16 | 9  | 5 | 1288.19  | 1424.90  | 72.56 o   |
| -15 | 9  | 5 | 1637.25  | 1836.10  | 87.96 o   |
| -14 | 9  | 5 | 102.63   | 114.34   | 19.79 o   |
| -13 | 9  | 5 | 2017.45  | 2449.60  | 101.15 o  |
| -12 | 9  | 5 | 60.81    | 123.14   | 24.19 o   |
| -11 | 9  | 5 | 1125.00  | 1130.25  | 61.57 o   |
| -10 | 9  | 5 | 7657.71  | 9409.19  | 354.03 o  |
| -9  | 9  | 5 | 295.35   | 428.79   | 28.59 o   |
| -8  | 9  | 5 | 2312.50  | 2640.91  | 94.55 o   |
| -7  | 9  | 5 | 1076.88  | 1035.69  | 46.18 o   |
| -6  | 9  | 5 | 46.45    | 87.96    | 21.99 o   |
| -5  | 9  | 5 | 5.99     | -6.60    | 35.18 <   |
| -4  | 9  | 5 | 4405.94  | 4039.42  | 140.73 o  |
| -3  | 9  | 5 | 179.23   | 193.51   | 21.99 o   |
| -2  | 9  | 5 | 3987.63  | 4041.62  | 134.13 o  |
| -1  | 9  | 5 | 1962.51  | 1838.30  | 68.17 o   |
| 0   | 9  | 5 | 1117.38  | 1020.30  | 43.98 o   |
| 1   | 9  | 5 | 3759.02  | 3527.07  | 123.14 o  |
| 2   | 9  | 5 | 12619.90 | 12731.80 | 565.12 o  |
| 3   | 9  | 5 | 91.59    | 83.56    | 19.79 o   |
| 4   | 9  | 5 | 14187.80 | 14372.20 | 457.38 o  |
| 5   | 9  | 5 | 0.67     | -2.20    | 8.80 <    |
| 6   | 9  | 5 | 3098.99  | 3326.97  | 109.95 o  |
| 7   | 9  | 5 | 581.88   | 602.51   | 32.98 o   |
| 8   | 9  | 5 | 116.75   | 123.14   | 17.59 o   |
| 9   | 9  | 5 | 745.70   | 754.23   | 123.14 o  |
| 10  | 9  | 5 | 3716.89  | 4274.71  | 167.12 o  |
| 11  | 9  | 5 | 2074.87  | 2297.88  | 87.96 o   |
| 12  | 9  | 5 | 273.87   | 305.65   | 24.19 o   |
| 13  | 9  | 5 | 1145.00  | 1161.03  | 50.58 o   |
| 14  | 9  | 5 | 2287.45  | 2379.24  | 107.75 o  |
| 15  | 9  | 5 | 4099.01  | 4373.66  | 156.12 o  |
| 16  | 9  | 5 | 5.12     | 10.99    | 15.39 <   |
| 17  | 9  | 5 | 1516.51  | 1145.64  | 72.56 o   |
| -18 | 10 | 5 | 1404.64  | 299.05   | 109.95 <  |

## regerite.cif

|     |    |   |          |          |         |   |
|-----|----|---|----------|----------|---------|---|
| -17 | 10 | 5 | 799.61   | 758.63   | 46.18   | o |
| -16 | 10 | 5 | 358.71   | 428.79   | 30.78   | o |
| -15 | 10 | 5 | 311.07   | 274.86   | 101.15  | < |
| -14 | 10 | 5 | 31.84    | 32.98    | 19.79   | < |
| -13 | 10 | 5 | 6686.69  | 8465.86  | 281.46  | o |
| -12 | 10 | 5 | 29.11    | 43.98    | 19.79   | < |
| -11 | 10 | 5 | 534.24   | 602.51   | 35.18   | o |
| -10 | 10 | 5 | 3095.01  | 3766.76  | 131.93  | o |
| -9  | 10 | 5 | 19156.00 | 22501.60 | 727.84  | o |
| -8  | 10 | 5 | 725.06   | 705.85   | 39.58   | o |
| -7  | 10 | 5 | 39.21    | 90.16    | 15.39   | o |
| -6  | 10 | 5 | 5.05     | 21.99    | 13.19   | < |
| -5  | 10 | 5 | 2694.89  | 2497.98  | 92.35   | o |
| -4  | 10 | 5 | 209.36   | 226.49   | 26.39   | o |
| -3  | 10 | 5 | 1395.31  | 1343.54  | 54.97   | o |
| -2  | 10 | 5 | 175.35   | 235.29   | 24.19   | o |
| -1  | 10 | 5 | 660.23   | 642.09   | 39.58   | o |
| 0   | 10 | 5 | 67.59    | 43.98    | 85.76   | < |
| 1   | 10 | 5 | 40554.40 | 40968.10 | 1295.17 | o |
| 2   | 10 | 5 | 565.17   | 406.80   | 30.78   | o |
| 3   | 10 | 5 | 356.81   | 466.17   | 39.58   | o |
| 4   | 10 | 5 | 286.96   | 347.43   | 24.19   | o |
| 5   | 10 | 5 | 1461.11  | 1246.79  | 50.58   | o |
| 6   | 10 | 5 | 791.06   | 855.38   | 43.98   | o |
| 7   | 10 | 5 | 16472.00 | 17426.50 | 556.33  | o |
| 8   | 10 | 5 | 470.95   | 439.79   | 30.78   | o |
| 9   | 10 | 5 | 35815.50 | 38626.30 | 1409.51 | o |
| 10  | 10 | 5 | 346.02   | 312.25   | 28.59   | o |
| 11  | 10 | 5 | 8518.01  | 9673.07  | 316.64  | o |
| 12  | 10 | 5 | 200.48   | 193.51   | 21.99   | o |
| 13  | 10 | 5 | 4085.04  | 4373.66  | 153.93  | o |
| 14  | 10 | 5 | 362.15   | 332.04   | 28.59   | o |
| 15  | 10 | 5 | 2209.36  | 2115.36  | 85.76   | o |
| 16  | 10 | 5 | 82.88    | 103.35   | 17.59   | o |
| 17  | 10 | 5 | 1801.90  | 1594.22  | 96.75   | o |
| -17 | 11 | 5 | 1018.66  | 1165.43  | 61.57   | o |
| -16 | 11 | 5 | 1074.85  | 1141.24  | 54.97   | o |
| -15 | 11 | 5 | 1916.00  | 2475.99  | 94.55   | o |
| -14 | 11 | 5 | 2113.96  | 2878.39  | 127.54  | o |
| -13 | 11 | 5 | 277.79   | 316.64   | 30.78   | o |
| -12 | 11 | 5 | 5502.28  | 7390.58  | 248.48  | o |
| -11 | 11 | 5 | 6425.51  | 8509.83  | 321.04  | o |
| -10 | 11 | 5 | 488.29   | 481.56   | 32.98   | o |
| -9  | 11 | 5 | 897.73   | 989.52   | 46.18   | o |
| -8  | 11 | 5 | 3711.75  | 3713.98  | 138.53  | o |
| -7  | 11 | 5 | 66.29    | 57.17    | 15.39   | o |
| -6  | 11 | 5 | 815.15   | 837.79   | 43.98   | o |
| -5  | 11 | 5 | 668.11   | 554.13   | 30.78   | o |
| -4  | 11 | 5 | 439.65   | 373.82   | 26.39   | o |
| -3  | 11 | 5 | 2127.22  | 2231.91  | 94.55   | o |
| -2  | 11 | 5 | 12911.00 | 13782.90 | 435.39  | o |
| -1  | 11 | 5 | 82.37    | 101.15   | 35.18   | < |
| 0   | 11 | 5 | 25016.90 | 24821.50 | 787.22  | o |
| 1   | 11 | 5 | 99.60    | 120.94   | 301.25  | < |

## regerite.cif

|     |    |   |          |          |         |   |
|-----|----|---|----------|----------|---------|---|
| 2   | 11 | 5 | 5906.51  | 6150.39  | 228.69  | o |
| 3   | 11 | 5 | 704.13   | 620.10   | 37.38   | o |
| 4   | 11 | 5 | 5526.39  | 5459.93  | 228.69  | o |
| 5   | 11 | 5 | 429.34   | 455.18   | 28.59   | o |
| 6   | 11 | 5 | 11.76    | 30.78    | 15.39   | < |
| 7   | 11 | 5 | 1818.39  | 1842.70  | 70.37   | o |
| 8   | 11 | 5 | 3992.73  | 4083.40  | 162.72  | o |
| 9   | 11 | 5 | 3143.00  | 3159.85  | 114.34  | o |
| 10  | 11 | 5 | 19.53    | 43.98    | 15.39   | < |
| 11  | 11 | 5 | 66.00    | 61.57    | 17.59   | o |
| 12  | 11 | 5 | 2522.43  | 2583.74  | 105.55  | o |
| 13  | 11 | 5 | 556.76   | 514.55   | 32.98   | o |
| 14  | 11 | 5 | 8.22     | 10.99    | 15.39   | < |
| 15  | 11 | 5 | 1171.11  | 1064.28  | 54.97   | o |
| 16  | 11 | 5 | 70.98    | 63.77    | 19.79   | o |
| 17  | 11 | 5 | 1036.49  | 945.54   | 81.36   | o |
| -17 | 12 | 5 | 121.40   | -19.79   | 61.57   | < |
| -16 | 12 | 5 | 38.79    | 41.78    | 19.79   | < |
| -15 | 12 | 5 | 184.61   | 215.49   | 24.19   | o |
| -14 | 12 | 5 | 1057.30  | 1383.12  | 72.56   | o |
| -13 | 12 | 5 | 430.89   | 496.96   | 32.98   | o |
| -12 | 12 | 5 | 2622.34  | 3326.97  | 120.94  | o |
| -11 | 12 | 5 | 30102.10 | 35488.40 | 1130.25 | o |
| -10 | 12 | 5 | 283.62   | 292.46   | 26.39   | o |
| -9  | 12 | 5 | 6276.68  | 6315.31  | 248.48  | o |
| -8  | 12 | 5 | 619.03   | 611.30   | 35.18   | o |
| -7  | 12 | 5 | 1568.96  | 1493.07  | 70.37   | o |
| -6  | 12 | 5 | 21.45    | -2.20    | 13.19   | < |
| -5  | 12 | 5 | 65.90    | 65.97    | 13.19   | o |
| -4  | 12 | 5 | 142.33   | 164.92   | 17.59   | o |
| -3  | 12 | 5 | 11014.40 | 11817.00 | 382.61  | o |
| -2  | 12 | 5 | 1.99     | 4.40     | 76.96   | < |
| -1  | 12 | 5 | 21609.70 | 22426.80 | 828.99  | o |
| 0   | 12 | 5 | 20.69    | 19.79    | 24.19   | < |
| 1   | 12 | 5 | 5801.48  | 6130.60  | 235.29  | o |
| 2   | 12 | 5 | 0.21     | -30.78   | 28.59   | < |
| 3   | 12 | 5 | 33848.00 | 35185.00 | 1119.25 | o |
| 4   | 12 | 5 | 153.58   | 114.34   | 30.78   | o |
| 5   | 12 | 5 | 161.89   | 175.91   | 19.79   | o |
| 6   | 12 | 5 | 696.12   | 666.27   | 35.18   | o |
| 7   | 12 | 5 | 3508.20  | 3654.61  | 127.54  | o |
| 8   | 12 | 5 | 2669.49  | 2704.68  | 98.95   | o |
| 9   | 12 | 5 | 116.78   | 96.75    | 17.59   | o |
| 10  | 12 | 5 | 6.51     | -6.60    | 15.39   | < |
| 11  | 12 | 5 | 1369.81  | 1427.10  | 65.97   | o |
| 12  | 12 | 5 | 562.83   | 516.75   | 70.37   | o |
| 13  | 12 | 5 | 105.86   | 129.74   | 21.99   | o |
| 14  | 12 | 5 | 195.93   | 217.69   | 24.19   | o |
| 15  | 12 | 5 | 1808.45  | 1638.20  | 70.37   | o |
| 16  | 12 | 5 | 706.29   | 591.51   | 54.97   | o |
| -16 | 13 | 5 | 470.44   | 549.73   | 52.77   | o |
| -15 | 13 | 5 | 117.74   | 105.55   | 24.19   | o |
| -14 | 13 | 5 | 15.96    | 6.60     | 17.59   | < |
| -13 | 13 | 5 | 562.82   | 591.51   | 37.38   | o |



## regerite.cif

|     |    |   |          |          |          |
|-----|----|---|----------|----------|----------|
| -12 | 13 | 5 | 1180.17  | 1286.37  | 59.37 o  |
| -11 | 13 | 5 | 19.83    | 30.78    | 15.39 <  |
| -10 | 13 | 5 | 2356.06  | 2508.97  | 96.75 o  |
| -9  | 13 | 5 | 122.72   | 107.75   | 30.78 o  |
| -8  | 13 | 5 | 8305.50  | 8782.50  | 338.63 o |
| -7  | 13 | 5 | 100.27   | 81.36    | 17.59 o  |
| -6  | 13 | 5 | 6744.30  | 6968.39  | 233.09 o |
| -5  | 13 | 5 | 5.22     | 2.20     | 15.39 <  |
| -4  | 13 | 5 | 1596.13  | 1537.05  | 61.57 o  |
| -3  | 13 | 5 | 730.98   | 690.46   | 37.38 o  |
| -2  | 13 | 5 | 5772.45  | 6640.75  | 224.29 o |
| -1  | 13 | 5 | 277.17   | 241.88   | 26.39 o  |
| 0   | 13 | 5 | 56.49    | 46.18    | 19.79 <  |
| 1   | 13 | 5 | 431.76   | 437.59   | 35.18 o  |
| 2   | 13 | 5 | 14168.80 | 14779.00 | 474.97 o |
| 3   | 13 | 5 | 336.30   | 312.25   | 30.78 o  |
| 4   | 13 | 5 | 168.48   | 180.31   | 26.39 o  |
| 5   | 13 | 5 | 130.34   | 138.53   | 19.79 o  |
| 6   | 13 | 5 | 9284.43  | 10656.00 | 395.81 o |
| 7   | 13 | 5 | 3196.13  | 3399.54  | 140.73 o |
| 8   | 13 | 5 | 14088.50 | 15091.20 | 485.96 o |
| 9   | 13 | 5 | 108.07   | 142.93   | 21.99 o  |
| 10  | 13 | 5 | 1087.03  | 1018.10  | 61.57 o  |
| 11  | 13 | 5 | 309.31   | 347.43   | 43.98 o  |
| 12  | 13 | 5 | 811.24   | 820.20   | 43.98 o  |
| 13  | 13 | 5 | 1103.38  | 1172.03  | 54.97 o  |
| 14  | 13 | 5 | 61.19    | 68.17    | 17.59 o  |
| 15  | 13 | 5 | 101.33   | 61.57    | 21.99 <  |
| 16  | 13 | 5 | 5850.07  | 4940.98  | 252.88 o |
| -16 | 14 | 5 | 101.86   | 24.19    | 32.98 <  |
| -15 | 14 | 5 | 17.21    | 0.00     | 21.99 <  |
| -14 | 14 | 5 | 47.49    | 41.78    | 19.79 <  |
| -13 | 14 | 5 | 4622.96  | 4925.59  | 171.52 o |
| -12 | 14 | 5 | 931.96   | 864.18   | 46.18 o  |
| -11 | 14 | 5 | 1815.03  | 1882.28  | 76.96 o  |
| -10 | 14 | 5 | 1.26     | 4.40     | 15.39 <  |
| -9  | 14 | 5 | 13668.20 | 14007.10 | 457.38 o |
| -8  | 14 | 5 | 528.30   | 532.14   | 32.98 o  |
| -7  | 14 | 5 | 2571.37  | 2902.58  | 125.34 o |
| -6  | 14 | 5 | 75.23    | 65.97    | 15.39 o  |
| -5  | 14 | 5 | 271.10   | 270.47   | 21.99 o  |
| -4  | 14 | 5 | 131.30   | 160.52   | 19.79 o  |
| -3  | 14 | 5 | 2547.21  | 2786.04  | 103.35 o |
| -2  | 14 | 5 | 787.86   | 833.39   | 48.38 o  |
| -1  | 14 | 5 | 1548.39  | 1405.11  | 68.17 o  |
| 0   | 14 | 5 | 5.02     | -2.20    | 15.39 <  |
| 1   | 14 | 5 | 906.04   | 1031.30  | 54.97 o  |
| 2   | 14 | 5 | 1189.87  | 1270.98  | 63.77 o  |
| 3   | 14 | 5 | 20122.80 | 21318.60 | 679.47 o |
| 4   | 14 | 5 | 1144.61  | 1088.47  | 54.97 o  |
| 5   | 14 | 5 | 179.10   | 114.34   | 26.39 o  |
| 6   | 14 | 5 | 4.14     | 10.99    | 17.59 <  |
| 7   | 14 | 5 | 1268.46  | 1218.20  | 54.97 o  |
| 8   | 14 | 5 | 931.27   | 923.55   | 50.58 o  |

## regerite.cif

|     |    |   |          |          |          |
|-----|----|---|----------|----------|----------|
| 9   | 14 | 5 | 870.80   | 921.35   | 43.98 o  |
| 10  | 14 | 5 | 8.96     | 4.40     | 13.19 <  |
| 11  | 14 | 5 | 5424.83  | 5550.08  | 208.90 o |
| 12  | 14 | 5 | 1.14     | 2.20     | 15.39 <  |
| 13  | 14 | 5 | 3547.58  | 3366.55  | 127.54 o |
| 14  | 14 | 5 | 317.81   | 228.69   | 39.58 o  |
| 15  | 14 | 5 | 81.80    | 125.34   | 30.78 o  |
| -15 | 15 | 5 | 1.64     | -48.38   | 24.19 <  |
| -14 | 15 | 5 | 611.61   | 529.94   | 39.58 o  |
| -13 | 15 | 5 | 27.77    | 30.78    | 17.59 <  |
| -12 | 15 | 5 | 7683.97  | 7667.65  | 305.65 o |
| -11 | 15 | 5 | 71.38    | 79.16    | 19.79 o  |
| -10 | 15 | 5 | 949.69   | 965.33   | 48.38 o  |
| -9  | 15 | 5 | 723.97   | 692.66   | 43.98 o  |
| -8  | 15 | 5 | 1179.14  | 1092.87  | 50.58 o  |
| -7  | 15 | 5 | 4.21     | 10.99    | 13.19 <  |
| -6  | 15 | 5 | 1455.51  | 1400.71  | 72.56 o  |
| -5  | 15 | 5 | 22.24    | 32.98    | 13.19 <  |
| -4  | 15 | 5 | 16932.70 | 17736.50 | 571.72 o |
| -3  | 15 | 5 | 1759.17  | 1965.84  | 76.96 o  |
| -2  | 15 | 5 | 2252.88  | 2480.39  | 107.75 o |
| -1  | 15 | 5 | 168.68   | 189.11   | 21.99 o  |
| 0   | 15 | 5 | 2872.48  | 2983.94  | 109.95 o |
| 1   | 15 | 5 | 96.87    | 90.16    | 17.59 o  |
| 2   | 15 | 5 | 8958.52  | 9728.04  | 371.62 o |
| 3   | 15 | 5 | 379.03   | 382.61   | 32.98 o  |
| 4   | 15 | 5 | 168.14   | 182.51   | 21.99 o  |
| 5   | 15 | 5 | 11.40    | 32.98    | 15.39 <  |
| 6   | 15 | 5 | 112.47   | 178.11   | 19.79 o  |
| 7   | 15 | 5 | 161.57   | 160.52   | 21.99 o  |
| 8   | 15 | 5 | 2570.78  | 2612.32  | 101.15 o |
| 9   | 15 | 5 | 352.08   | 307.85   | 26.39 o  |
| 10  | 15 | 5 | 623.17   | 595.91   | 35.18 o  |
| 11  | 15 | 5 | 4379.74  | 4494.60  | 158.32 o |
| 12  | 15 | 5 | 1620.20  | 1594.22  | 72.56 o  |
| 13  | 15 | 5 | 3647.64  | 3331.37  | 149.53 o |
| 14  | 15 | 5 | 3859.95  | 3507.28  | 204.50 o |
| -15 | 16 | 5 | 37.00    | 26.39    | 32.98 <  |
| -14 | 16 | 5 | 299.88   | 226.49   | 35.18 o  |
| -13 | 16 | 5 | 98.00    | 90.16    | 19.79 o  |
| -12 | 16 | 5 | 1000.51  | 1018.10  | 59.37 o  |
| -11 | 16 | 5 | 4228.49  | 4710.09  | 193.51 o |
| -10 | 16 | 5 | 751.58   | 723.45   | 41.78 o  |
| -9  | 16 | 5 | 15.78    | 28.59    | 19.79 <  |
| -8  | 16 | 5 | 779.15   | 818.00   | 50.58 o  |
| -7  | 16 | 5 | 37.14    | 85.76    | 21.99 o  |
| -6  | 16 | 5 | 746.80   | 749.83   | 46.18 o  |
| -5  | 16 | 5 | 849.09   | 804.81   | 41.78 o  |
| -4  | 16 | 5 | 136.18   | 164.92   | 21.99 o  |
| -3  | 16 | 5 | 2512.93  | 2522.17  | 96.75 o  |
| -2  | 16 | 5 | 32.93    | 32.98    | 21.99 <  |
| -1  | 16 | 5 | 1818.60  | 1906.47  | 83.56 o  |
| 0   | 16 | 5 | 1.13     | 15.39    | 17.59 <  |
| 1   | 16 | 5 | 220.77   | 217.69   | 21.99 o  |

## regerite.cif

|     |    |   |          |          |        |   |
|-----|----|---|----------|----------|--------|---|
| 2   | 16 | 5 | 229.30   | 228.69   | 21.99  | o |
| 3   | 16 | 5 | 5891.22  | 6631.95  | 222.09 | o |
| 4   | 16 | 5 | 55.82    | 83.56    | 17.59  | o |
| 5   | 16 | 5 | 1088.84  | 1042.29  | 57.17  | o |
| 6   | 16 | 5 | 121.41   | 134.13   | 17.59  | o |
| 7   | 16 | 5 | 1625.36  | 1572.23  | 98.95  | o |
| 8   | 16 | 5 | 2298.40  | 2045.00  | 85.76  | o |
| 9   | 16 | 5 | 1648.82  | 1640.40  | 70.37  | o |
| 10  | 16 | 5 | 12.50    | 13.19    | 13.19  | < |
| 11  | 16 | 5 | 6016.70  | 6222.95  | 213.30 | o |
| 12  | 16 | 5 | 401.74   | 391.41   | 35.18  | o |
| 13  | 16 | 5 | 1982.66  | 1642.60  | 103.35 | o |
| -14 | 17 | 5 | 641.67   | 318.84   | 61.57  | o |
| -13 | 17 | 5 | 94.19    | 26.39    | 21.99  | < |
| -12 | 17 | 5 | 0.44     | 28.59    | 15.39  | < |
| -11 | 17 | 5 | 657.57   | 655.28   | 43.98  | o |
| -10 | 17 | 5 | 7099.64  | 7542.31  | 296.86 | o |
| -9  | 17 | 5 | 80.56    | 72.56    | 17.59  | o |
| -8  | 17 | 5 | 901.28   | 868.58   | 43.98  | o |
| -7  | 17 | 5 | 8.16     | 21.99    | 72.56  | < |
| -6  | 17 | 5 | 7332.17  | 7559.90  | 255.07 | o |
| -5  | 17 | 5 | 497.49   | 551.93   | 39.58  | o |
| -4  | 17 | 5 | 2.11     | -2.20    | 10.99  | < |
| -3  | 17 | 5 | 182.19   | 178.11   | 19.79  | o |
| -2  | 17 | 5 | 15690.60 | 19126.20 | 613.50 | o |
| -1  | 17 | 5 | 418.97   | 351.83   | 35.18  | o |
| 0   | 17 | 5 | 2881.38  | 2852.00  | 125.34 | o |
| 1   | 17 | 5 | 78.49    | 46.18    | 116.54 | < |
| 2   | 17 | 5 | 5011.49  | 5209.25  | 204.50 | o |
| 3   | 17 | 5 | 25.62    | 32.98    | 21.99  | < |
| 4   | 17 | 5 | 491.35   | 481.56   | 32.98  | o |
| 5   | 17 | 5 | 373.39   | 402.40   | 35.18  | o |
| 6   | 17 | 5 | 4390.68  | 4602.35  | 164.92 | o |
| 7   | 17 | 5 | 98.59    | 70.37    | 17.59  | o |
| 8   | 17 | 5 | 11126.60 | 11667.50 | 384.81 | o |
| 9   | 17 | 5 | 0.60     | -10.99   | 13.19  | < |
| 10  | 17 | 5 | 161.88   | 136.33   | 19.79  | o |
| 11  | 17 | 5 | 485.37   | 382.61   | 41.78  | o |
| 12  | 17 | 5 | 2999.39  | 2517.77  | 145.13 | o |
| -13 | 18 | 5 | 256.35   | 107.75   | 35.18  | o |
| -12 | 18 | 5 | 123.41   | 109.95   | 21.99  | o |
| -11 | 18 | 5 | 3465.04  | 3214.83  | 151.73 | o |
| -10 | 18 | 5 | 2041.66  | 2185.73  | 116.54 | o |
| -9  | 18 | 5 | 323.63   | 281.46   | 26.39  | o |
| -8  | 18 | 5 | 1157.64  | 1123.65  | 52.77  | o |
| -7  | 18 | 5 | 17.25    | 8.80     | 15.39  | < |
| -6  | 18 | 5 | 440.49   | 512.35   | 32.98  | o |
| -5  | 18 | 5 | 7102.24  | 8023.87  | 310.05 | o |
| -4  | 18 | 5 | 27.83    | 41.78    | 15.39  | < |
| -3  | 18 | 5 | 6095.72  | 6614.36  | 226.49 | o |
| -2  | 18 | 5 | 503.35   | 529.94   | 35.18  | o |
| -1  | 18 | 5 | 711.79   | 659.68   | 50.58  | o |
| 0   | 18 | 5 | 145.82   | 85.76    | 37.38  | < |
| 1   | 18 | 5 | 5439.05  | 5763.38  | 230.89 | o |

## regerite.cif

|     |    |   |          |          |         |   |
|-----|----|---|----------|----------|---------|---|
| 2   | 18 | 5 | 315.88   | 323.24   | 241.88  | < |
| 3   | 18 | 5 | 15.44    | -2.20    | 15.39   | < |
| 4   | 18 | 5 | 6.17     | -10.99   | 15.39   | < |
| 5   | 18 | 5 | 2211.58  | 2207.72  | 87.96   | o |
| 6   | 18 | 5 | 129.28   | 182.51   | 21.99   | o |
| 7   | 18 | 5 | 715.37   | 672.87   | 37.38   | o |
| 8   | 18 | 5 | 83.88    | 81.36    | 17.59   | o |
| 9   | 18 | 5 | 2252.65  | 1968.04  | 81.36   | o |
| 10  | 18 | 5 | 542.44   | 468.37   | 41.78   | o |
| 11  | 18 | 5 | 382.33   | 250.68   | 35.18   | o |
| -12 | 19 | 5 | 111.98   | 59.37    | 32.98   | < |
| -11 | 19 | 5 | 31.27    | 28.59    | 19.79   | < |
| -10 | 19 | 5 | 5432.73  | 4635.33  | 279.26  | o |
| -9  | 19 | 5 | 0.47     | -10.99   | 15.39   | < |
| -8  | 19 | 5 | 2149.46  | 1950.45  | 87.96   | o |
| -7  | 19 | 5 | 230.94   | 230.89   | 24.19   | o |
| -6  | 19 | 5 | 4350.35  | 4716.69  | 164.92  | o |
| -5  | 19 | 5 | 501.70   | 450.78   | 30.78   | o |
| -4  | 19 | 5 | 28838.60 | 32519.90 | 1119.25 | o |
| -3  | 19 | 5 | 0.78     | 4.40     | 15.39   | < |
| -2  | 19 | 5 | 199.39   | 233.09   | 24.19   | o |
| -1  | 19 | 5 | 28.59    | 35.18    | 17.59   | < |
| 0   | 19 | 5 | 609.93   | 712.45   | 39.58   | o |
| 1   | 19 | 5 | 1113.00  | 1145.64  | 54.97   | o |
| 2   | 19 | 5 | 76.49    | 87.96    | 28.59   | o |
| 3   | 19 | 5 | 181.91   | 178.11   | 21.99   | o |
| 4   | 19 | 5 | 8859.97  | 9884.16  | 329.84  | o |
| 5   | 19 | 5 | 61.55    | 112.14   | 19.79   | o |
| 6   | 19 | 5 | 4304.01  | 4356.07  | 156.12  | o |
| 7   | 19 | 5 | 193.32   | 213.30   | 24.19   | o |
| 8   | 19 | 5 | 67.88    | 35.18    | 17.59   | < |
| 9   | 19 | 5 | 173.44   | 158.32   | 26.39   | o |
| 10  | 19 | 5 | 2908.96  | 2313.27  | 136.33  | o |
| -10 | 20 | 5 | 501.30   | 268.27   | 35.18   | o |
| -9  | 20 | 5 | 3732.28  | 2766.25  | 180.31  | o |
| -8  | 20 | 5 | 341.20   | 178.11   | 35.18   | o |
| -7  | 20 | 5 | 23.00    | 13.19    | 17.59   | < |
| -6  | 20 | 5 | 1.17     | -13.19   | 46.18   | < |
| -5  | 20 | 5 | 12325.20 | 13197.90 | 472.77  | o |
| -4  | 20 | 5 | 920.47   | 894.96   | 54.97   | o |
| -3  | 20 | 5 | 726.36   | 567.32   | 35.18   | o |
| -2  | 20 | 5 | 116.65   | 140.73   | 19.79   | o |
| -1  | 20 | 5 | 8069.92  | 9299.25  | 312.25  | o |
| 0   | 20 | 5 | 322.73   | 281.46   | 41.78   | o |
| 1   | 20 | 5 | 11478.20 | 12685.60 | 417.80  | o |
| 2   | 20 | 5 | 28.89    | 2.20     | 367.22  | < |
| 3   | 20 | 5 | 41.86    | 103.35   | 46.18   | < |
| 4   | 20 | 5 | 380.47   | 376.02   | 28.59   | o |
| 5   | 20 | 5 | 629.47   | 719.05   | 41.78   | o |
| 6   | 20 | 5 | 214.19   | 213.30   | 32.98   | o |
| 7   | 20 | 5 | 257.50   | 228.69   | 37.38   | o |
| 8   | 20 | 5 | 19.87    | 39.58    | 35.18   | < |
| 9   | 20 | 5 | 1802.02  | 1523.85  | 94.55   | o |
| -9  | 21 | 5 | 1028.64  | 672.87   | 68.17   | o |

## regerite.cif

|     |    |   |           |           |         |   |
|-----|----|---|-----------|-----------|---------|---|
| -8  | 21 | 5 | 83.25     | 39.58     | 26.39   | < |
| -7  | 21 | 5 | 363.02    | 237.48    | 35.18   | o |
| -6  | 21 | 5 | 5210.35   | 4008.64   | 206.70  | o |
| -5  | 21 | 5 | 559.68    | 477.17    | 39.58   | o |
| -4  | 21 | 5 | 491.08    | 369.42    | 35.18   | o |
| -3  | 21 | 5 | 65.41     | 87.96     | 21.99   | o |
| -2  | 21 | 5 | 278.43    | 277.06    | 39.58   | o |
| -1  | 21 | 5 | 115.41    | 98.95     | 21.99   | o |
| 0   | 21 | 5 | 478.08    | 463.97    | 32.98   | o |
| 1   | 21 | 5 | 0.08      | -10.99    | 19.79   | < |
| 2   | 21 | 5 | 1266.85   | 958.73    | 68.17   | o |
| 3   | 21 | 5 | 204.54    | 178.11    | 35.18   | o |
| 4   | 21 | 5 | 249.49    | 191.31    | 26.39   | o |
| 5   | 21 | 5 | 11.57     | 6.60      | 19.79   | < |
| 6   | 21 | 5 | 1065.54   | 866.38    | 83.56   | o |
| 7   | 21 | 5 | 28.26     | 10.99     | 35.18   | < |
| -6  | 22 | 5 | 110.14    | 87.96     | 26.39   | o |
| -5  | 22 | 5 | 8023.92   | 5736.99   | 285.86  | o |
| -4  | 22 | 5 | 30.72     | 6.60      | 24.19   | < |
| -3  | 22 | 5 | 20.17     | -6.60     | 24.19   | < |
| -2  | 22 | 5 | 91.95     | 52.77     | 28.59   | < |
| -1  | 22 | 5 | 363.85    | 164.92    | 30.78   | o |
| 0   | 22 | 5 | 249.89    | 158.32    | 37.38   | o |
| 1   | 22 | 5 | 530.27    | 349.63    | 50.58   | o |
| 2   | 22 | 5 | 1.12      | 0.00      | 21.99   | < |
| 3   | 22 | 5 | 2337.32   | 1567.83   | 101.15  | o |
| 4   | 22 | 5 | 421.70    | 334.24    | 39.58   | o |
| 5   | 22 | 5 | 204.97    | 160.52    | 28.59   | o |
| -1  | 23 | 5 | 86.29     | 70.37     | 24.19   | < |
| 0   | 23 | 5 | 1855.85   | 1389.72   | 90.16   | o |
| -19 | 0  | 6 | 127.35    | 112.14    | 21.99   | o |
| -18 | 0  | 6 | 408.62    | 329.84    | 32.98   | o |
| -17 | 0  | 6 | 6722.29   | 6416.46   | 310.05  | o |
| -16 | 0  | 6 | 9124.01   | 8797.89   | 409.00  | o |
| -15 | 0  | 6 | 83.30     | 87.96     | 19.79   | o |
| -14 | 0  | 6 | 617.15    | 492.56    | 39.58   | o |
| -13 | 0  | 6 | 701.67    | 727.84    | 50.58   | o |
| -12 | 0  | 6 | 1648.08   | 1622.81   | 90.16   | o |
| -11 | 0  | 6 | 2379.96   | 2146.15   | 109.95  | o |
| -10 | 0  | 6 | 71.80     | 94.55     | 17.59   | o |
| -9  | 0  | 6 | 4136.70   | 3991.05   | 186.91  | o |
| -8  | 0  | 6 | 6126.29   | 5616.05   | 263.87  | o |
| -7  | 0  | 6 | 913.76    | 930.15    | 52.77   | o |
| -6  | 0  | 6 | 264.90    | 208.90    | 28.59   | o |
| -5  | 0  | 6 | 88.64     | 76.96     | 15.39   | o |
| -4  | 0  | 6 | 13753.10  | 12729.60  | 567.32  | o |
| -3  | 0  | 6 | 59.39     | 48.38     | 13.19   | o |
| -2  | 0  | 6 | 169571.00 | 172297.00 | 7639.06 | o |
| -1  | 0  | 6 | 583.51    | 545.33    | 28.59   | o |
| 0   | 0  | 6 | 13173.10  | 14596.50  | 648.68  | o |
| 1   | 0  | 6 | 430.84    | 444.18    | 21.99   | o |
| 2   | 0  | 6 | 42750.10  | 46395.10  | 2374.84 | o |
| 3   | 0  | 6 | 3234.80   | 3258.80   | 149.53  | o |
| 4   | 0  | 6 | 89427.90  | 91356.50  | 4054.82 | o |

## regerite.cif

|     |   |   |          |          |           |
|-----|---|---|----------|----------|-----------|
| 5   | 0 | 6 | 5359.33  | 5321.40  | 244.08 o  |
| 6   | 0 | 6 | 19976.60 | 19790.30 | 888.36 o  |
| 7   | 0 | 6 | 4788.14  | 5233.44  | 343.03 o  |
| 8   | 0 | 6 | 7240.30  | 7603.88  | 349.63 o  |
| 9   | 0 | 6 | 6440.66  | 7161.89  | 332.04 o  |
| 10  | 0 | 6 | 49.99    | 68.17    | 15.39 o   |
| 11  | 0 | 6 | 145.26   | 120.94   | 19.79 o   |
| 12  | 0 | 6 | 54679.50 | 65648.90 | 2924.57 o |
| 13  | 0 | 6 | 661.38   | 529.94   | 43.98 o   |
| 14  | 0 | 6 | 12529.50 | 14537.10 | 664.08 o  |
| 15  | 0 | 6 | 289.96   | 347.43   | 35.18 o   |
| 16  | 0 | 6 | 311.85   | 224.29   | 28.59 o   |
| 17  | 0 | 6 | 191.29   | 178.11   | 28.59 o   |
| 18  | 0 | 6 | 208.53   | 215.49   | 30.78 o   |
| -19 | 1 | 6 | 628.90   | 474.97   | 28.59 o   |
| -18 | 1 | 6 | 382.34   | 327.64   | 24.19 o   |
| -17 | 1 | 6 | 3829.78  | 3450.11  | 134.13 o  |
| -16 | 1 | 6 | 7898.73  | 8384.50  | 277.06 o  |
| -15 | 1 | 6 | 685.23   | 514.55   | 28.59 o   |
| -14 | 1 | 6 | 548.90   | 485.96   | 28.59 o   |
| -13 | 1 | 6 | 2138.25  | 2165.94  | 79.16 o   |
| -12 | 1 | 6 | 110.28   | 105.55   | 13.19 o   |
| -11 | 1 | 6 | 2975.58  | 3008.13  | 105.55 o  |
| -10 | 1 | 6 | 1122.18  | 1029.10  | 43.98 o   |
| -9  | 1 | 6 | 6117.66  | 6198.77  | 202.30 o  |
| -8  | 1 | 6 | 1746.60  | 1721.76  | 74.76 o   |
| -7  | 1 | 6 | 30272.80 | 29634.90 | 934.54 o  |
| -6  | 1 | 6 | 653.43   | 606.90   | 30.78 o   |
| -5  | 1 | 6 | 13722.60 | 13002.20 | 413.40 o  |
| -4  | 1 | 6 | 14.57    | 17.59    | 8.80 <    |
| -3  | 1 | 6 | 15551.50 | 15480.40 | 488.16 o  |
| -2  | 1 | 6 | 1015.29  | 1024.70  | 35.18 o   |
| -1  | 1 | 6 | 1473.68  | 1539.25  | 74.76 o   |
| 0   | 1 | 6 | 783.06   | 833.39   | 41.78 o   |
| 1   | 1 | 6 | 23262.10 | 23845.10 | 1059.88 o |
| 2   | 1 | 6 | 13.57    | 4.40     | 8.80 <    |
| 3   | 1 | 6 | 67988.40 | 65743.40 | 2064.79 o |
| 4   | 1 | 6 | 4115.47  | 4026.23  | 131.93 o  |
| 5   | 1 | 6 | 6387.73  | 6878.23  | 219.89 o  |
| 6   | 1 | 6 | 1525.58  | 1328.15  | 48.38 o   |
| 7   | 1 | 6 | 40490.60 | 40583.30 | 1367.73 o |
| 8   | 1 | 6 | 418.32   | 472.77   | 28.59 o   |
| 9   | 1 | 6 | 16923.20 | 18660.10 | 593.71 o  |
| 10  | 1 | 6 | 4.42     | 4.40     | 8.80 <    |
| 11  | 1 | 6 | 1866.62  | 2165.94  | 79.16 o   |
| 12  | 1 | 6 | 5399.90  | 5981.07  | 200.10 o  |
| 13  | 1 | 6 | 1351.79  | 1581.03  | 83.56 o   |
| 14  | 1 | 6 | 5494.39  | 6744.10  | 226.49 o  |
| 15  | 1 | 6 | 306.49   | 299.05   | 21.99 o   |
| 16  | 1 | 6 | 1332.10  | 1266.58  | 54.97 o   |
| 17  | 1 | 6 | 643.61   | 692.66   | 43.98 o   |
| 18  | 1 | 6 | 3608.91  | 3322.57  | 123.14 o  |
| -19 | 2 | 6 | 1276.14  | 1121.45  | 50.58 o   |
| -18 | 2 | 6 | 1881.34  | 1686.57  | 68.17 o   |

## regerite.cif

|     |   |   |          |          |         |   |
|-----|---|---|----------|----------|---------|---|
| -17 | 2 | 6 | 1408.00  | 1339.14  | 68.17   | o |
| -16 | 2 | 6 | 7797.84  | 8283.35  | 272.67  | o |
| -15 | 2 | 6 | 1507.16  | 1402.91  | 59.37   | o |
| -14 | 2 | 6 | 4940.06  | 5182.86  | 175.91  | o |
| -13 | 2 | 6 | 3115.86  | 3247.81  | 134.13  | o |
| -12 | 2 | 6 | 7582.52  | 7318.02  | 274.86  | o |
| -11 | 2 | 6 | 2094.45  | 2003.22  | 74.76   | o |
| -10 | 2 | 6 | 2130.48  | 2209.92  | 79.16   | o |
| -9  | 2 | 6 | 557.65   | 470.57   | 26.39   | o |
| -8  | 2 | 6 | 42239.70 | 41887.30 | 1521.66 | o |
| -7  | 2 | 6 | 3478.20  | 3239.01  | 123.14  | o |
| -6  | 2 | 6 | 18391.10 | 18383.00 | 582.72  | o |
| -5  | 2 | 6 | 17.58    | 10.99    | 8.80    | < |
| -4  | 2 | 6 | 142.49   | 98.95    | 10.99   | o |
| -3  | 2 | 6 | 275.57   | 219.89   | 13.19   | o |
| -2  | 2 | 6 | 23871.00 | 25560.30 | 927.95  | o |
| -1  | 2 | 6 | 38.32    | 13.19    | 19.79   | < |
| 0   | 2 | 6 | 205.61   | 171.52   | 15.39   | o |
| 1   | 2 | 6 | 683.00   | 646.48   | 37.38   | o |
| 2   | 2 | 6 | 9703.31  | 9974.32  | 450.78  | o |
| 3   | 2 | 6 | 0.90     | 4.40     | 6.60    | < |
| 4   | 2 | 6 | 12291.60 | 12734.00 | 404.60  | o |
| 5   | 2 | 6 | 56.39    | 79.16    | 8.80    | o |
| 6   | 2 | 6 | 5512.49  | 5429.14  | 202.30  | o |
| 7   | 2 | 6 | 1049.31  | 1031.30  | 41.78   | o |
| 8   | 2 | 6 | 206.74   | 173.71   | 15.39   | o |
| 9   | 2 | 6 | 4247.03  | 4395.65  | 147.33  | o |
| 10  | 2 | 6 | 7854.80  | 9041.97  | 292.46  | o |
| 11  | 2 | 6 | 28.91    | 50.58    | 13.19   | o |
| 12  | 2 | 6 | 111.79   | 129.74   | 17.59   | o |
| 13  | 2 | 6 | 2727.68  | 3206.03  | 129.74  | o |
| 14  | 2 | 6 | 49.74    | 30.78    | 15.39   | < |
| 15  | 2 | 6 | 34.37    | 35.18    | 10.99   | o |
| 16  | 2 | 6 | 437.03   | 369.42   | 26.39   | o |
| 17  | 2 | 6 | 1217.66  | 1165.43  | 54.97   | o |
| 18  | 2 | 6 | 6805.12  | 6513.21  | 224.29  | o |
| -19 | 3 | 6 | 70.82    | 54.97    | 13.19   | o |
| -18 | 3 | 6 | 280.45   | 268.27   | 21.99   | o |
| -17 | 3 | 6 | 3000.83  | 2884.99  | 107.75  | o |
| -16 | 3 | 6 | 1323.89  | 1196.21  | 57.17   | o |
| -15 | 3 | 6 | 534.62   | 571.72   | 32.98   | o |
| -14 | 3 | 6 | 6188.81  | 6511.01  | 217.69  | o |
| -13 | 3 | 6 | 10482.00 | 11058.40 | 358.42  | o |
| -12 | 3 | 6 | 18.02    | 24.19    | 13.19   | < |
| -11 | 3 | 6 | 13292.40 | 13620.10 | 437.59  | o |
| -10 | 3 | 6 | 639.28   | 699.26   | 35.18   | o |
| -9  | 3 | 6 | 5307.31  | 5517.10  | 182.51  | o |
| -8  | 3 | 6 | 528.38   | 529.94   | 147.33  | o |
| -7  | 3 | 6 | 5889.38  | 5822.75  | 189.11  | o |
| -6  | 3 | 6 | 120.60   | 98.95    | 13.19   | o |
| -5  | 3 | 6 | 9790.10  | 10678.00 | 373.82  | o |
| -4  | 3 | 6 | 1553.44  | 1451.29  | 52.77   | o |
| -3  | 3 | 6 | 62597.90 | 63520.30 | 2003.22 | o |
| -2  | 3 | 6 | 1996.51  | 2225.31  | 96.75   | o |

## regerite.cif

|     |   |   |          |          |           |
|-----|---|---|----------|----------|-----------|
| -1  | 3 | 6 | 1497.63  | 1559.04  | 79.16 o   |
| 0   | 3 | 6 | 63.89    | 43.98    | 13.19 o   |
| 1   | 3 | 6 | 4290.92  | 4483.61  | 208.90 o  |
| 2   | 3 | 6 | 78.24    | 43.98    | 13.19 o   |
| 3   | 3 | 6 | 3667.53  | 3881.10  | 158.32 o  |
| 4   | 3 | 6 | 8.71     | 13.19    | 6.60 <    |
| 5   | 3 | 6 | 37510.60 | 37005.70 | 1345.74 o |
| 6   | 3 | 6 | 2645.75  | 2691.48  | 90.16 o   |
| 7   | 3 | 6 | 2071.18  | 2084.58  | 83.56 o   |
| 8   | 3 | 6 | 8.56     | 6.60     | 8.80 <    |
| 9   | 3 | 6 | 12441.60 | 13389.20 | 457.38 o  |
| 10  | 3 | 6 | 900.89   | 853.18   | 39.58 o   |
| 11  | 3 | 6 | 478.80   | 417.80   | 28.59 o   |
| 12  | 3 | 6 | 587.07   | 593.71   | 37.38 o   |
| 13  | 3 | 6 | 7251.30  | 7907.33  | 365.02 o  |
| 14  | 3 | 6 | 1490.63  | 1649.19  | 120.94 o  |
| 15  | 3 | 6 | 328.42   | 316.64   | 26.39 o   |
| 16  | 3 | 6 | 1798.48  | 1693.17  | 90.16 o   |
| 17  | 3 | 6 | 230.70   | 169.32   | 19.79 o   |
| 18  | 3 | 6 | 1954.08  | 1636.00  | 70.37 o   |
| -19 | 4 | 6 | 13.46    | 21.99    | 13.19 <   |
| -18 | 4 | 6 | 4464.58  | 4208.74  | 149.53 o  |
| -17 | 4 | 6 | 21.16    | 39.58    | 15.39 <   |
| -16 | 4 | 6 | 471.07   | 463.97   | 30.78 o   |
| -15 | 4 | 6 | 1656.97  | 1629.40  | 65.97 o   |
| -14 | 4 | 6 | 2945.98  | 2977.34  | 107.75 o  |
| -13 | 4 | 6 | 39.40    | 61.57    | 15.39 o   |
| -12 | 4 | 6 | 2518.50  | 2489.18  | 92.35 o   |
| -11 | 4 | 6 | 975.21   | 912.55   | 41.78 o   |
| -10 | 4 | 6 | 14060.70 | 14394.20 | 461.77 o  |
| -9  | 4 | 6 | 2533.93  | 2502.38  | 87.96 o   |
| -8  | 4 | 6 | 5076.88  | 5187.26  | 200.10 o  |
| -7  | 4 | 6 | 3.61     | 10.99    | 8.80 <    |
| -6  | 4 | 6 | 24849.50 | 25467.90 | 934.54 o  |
| -5  | 4 | 6 | 332.38   | 307.85   | 19.79 o   |
| -4  | 4 | 6 | 35794.00 | 36660.50 | 1332.55 o |
| -3  | 4 | 6 | 807.71   | 850.98   | 37.38 o   |
| -2  | 4 | 6 | 14756.80 | 15344.10 | 562.92 o  |
| -1  | 4 | 6 | 151.86   | 149.53   | 17.59 o   |
| 0   | 4 | 6 | 23.39    | 35.18    | 13.19 <   |
| 1   | 4 | 6 | 6.75     | 0.00     | 13.19 <   |
| 2   | 4 | 6 | 205.28   | 228.69   | 21.99 o   |
| 3   | 4 | 6 | 161.97   | 149.53   | 15.39 o   |
| 4   | 4 | 6 | 316.15   | 494.76   | 26.39 o   |
| 5   | 4 | 6 | 4084.78  | 4215.34  | 138.53 o  |
| 6   | 4 | 6 | 10270.60 | 10759.30 | 395.81 o  |
| 7   | 4 | 6 | 238.30   | 226.49   | 15.39 o   |
| 8   | 4 | 6 | 718.34   | 791.61   | 35.18 o   |
| 9   | 4 | 6 | 23.52    | 46.18    | 13.19 o   |
| 10  | 4 | 6 | 754.06   | 741.04   | 35.18 o   |
| 11  | 4 | 6 | 2421.39  | 2526.56  | 90.16 o   |
| 12  | 4 | 6 | 2607.69  | 2814.62  | 98.95 o   |
| 13  | 4 | 6 | 158.97   | 169.32   | 19.79 o   |
| 14  | 4 | 6 | 4053.90  | 3865.71  | 193.51 o  |



## regerite.cif

|     |   |   |          |          |           |
|-----|---|---|----------|----------|-----------|
| 15  | 4 | 6 | 2.07     | 26.39    | 13.19 <   |
| 16  | 4 | 6 | 7414.27  | 8125.02  | 290.26 o  |
| 17  | 4 | 6 | 1071.09  | 875.17   | 46.18 o   |
| 18  | 4 | 6 | 176.65   | 68.17    | 15.39 o   |
| -19 | 5 | 6 | 153.40   | 151.73   | 30.78 o   |
| -18 | 5 | 6 | 796.17   | 741.04   | 39.58 o   |
| -17 | 5 | 6 | 2271.78  | 2451.80  | 109.95 o  |
| -16 | 5 | 6 | 84.42    | 74.76    | 13.19 o   |
| -15 | 5 | 6 | 20171.60 | 21912.30 | 701.46 o  |
| -14 | 5 | 6 | 199.80   | 202.30   | 19.79 o   |
| -13 | 5 | 6 | 4773.59  | 5163.07  | 204.50 o  |
| -12 | 5 | 6 | 43.88    | 61.57    | 17.59 o   |
| -11 | 5 | 6 | 5545.03  | 5820.55  | 222.09 o  |
| -10 | 5 | 6 | 339.53   | 424.39   | 26.39 o   |
| -9  | 5 | 6 | 27984.80 | 31193.90 | 987.32 o  |
| -8  | 5 | 6 | 170.87   | 134.13   | 17.59 o   |
| -7  | 5 | 6 | 15537.30 | 17404.50 | 554.13 o  |
| -6  | 5 | 6 | 676.32   | 710.25   | 35.18 o   |
| -5  | 5 | 6 | 2776.11  | 2731.06  | 109.95 o  |
| -4  | 5 | 6 | 842.51   | 978.52   | 303.45 o  |
| -3  | 5 | 6 | 759.86   | 721.25   | 411.20 <  |
| -2  | 5 | 6 | 328.91   | 329.84   | 19.79 o   |
| -1  | 5 | 6 | 59160.50 | 56162.70 | 3533.67 o |
| 0   | 5 | 6 | 250.78   | 406.80   | 35.18 o   |
| 1   | 5 | 6 | 2836.99  | 3067.50  | 206.70 o  |
| 2   | 5 | 6 | 2285.30  | 2190.13  | 160.52 o  |
| 3   | 5 | 6 | 923.78   | 771.82   | 30.78 o   |
| 4   | 5 | 6 | 116.40   | 120.94   | 13.19 o   |
| 5   | 5 | 6 | 31846.30 | 31246.70 | 1134.64 o |
| 6   | 5 | 6 | 462.77   | 384.81   | 19.79 o   |
| 7   | 5 | 6 | 1485.57  | 1541.45  | 57.17 o   |
| 8   | 5 | 6 | 211.15   | 171.52   | 15.39 o   |
| 9   | 5 | 6 | 1390.69  | 1354.54  | 52.77 o   |
| 10  | 5 | 6 | 2677.74  | 3016.92  | 120.94 o  |
| 11  | 5 | 6 | 38708.30 | 41834.50 | 1521.66 o |
| 12  | 5 | 6 | 487.44   | 543.13   | 35.18 o   |
| 13  | 5 | 6 | 983.11   | 923.55   | 48.38 o   |
| 14  | 5 | 6 | 2185.01  | 2099.97  | 90.16 o   |
| 15  | 5 | 6 | 352.69   | 299.05   | 24.19 o   |
| 16  | 5 | 6 | 2896.73  | 3239.01  | 147.33 o  |
| 17  | 5 | 6 | 3983.22  | 3610.63  | 167.12 o  |
| 18  | 5 | 6 | 98.91    | 68.17    | 15.39 o   |
| -19 | 6 | 6 | 51.57    | 79.16    | 30.78 <   |
| -18 | 6 | 6 | 60.42    | 79.16    | 15.39 o   |
| -17 | 6 | 6 | 298.73   | 268.27   | 21.99 o   |
| -16 | 6 | 6 | 2076.16  | 2055.99  | 116.54 o  |
| -15 | 6 | 6 | 3584.32  | 3982.25  | 140.73 o  |
| -14 | 6 | 6 | 466.09   | 439.79   | 28.59 o   |
| -13 | 6 | 6 | 1340.94  | 1440.30  | 70.37 o   |
| -12 | 6 | 6 | 140.87   | 160.52   | 21.99 o   |
| -11 | 6 | 6 | 1802.01  | 2012.02  | 76.96 o   |
| -10 | 6 | 6 | 4207.10  | 4956.37  | 167.12 o  |
| -9  | 6 | 6 | 7531.28  | 9017.79  | 294.66 o  |
| -8  | 6 | 6 | 12809.10 | 12973.60 | 422.19 o  |

## regerite.cif

|     |   |   |           |           |           |
|-----|---|---|-----------|-----------|-----------|
| -7  | 6 | 6 | 128.73    | 140.73    | 17.59 o   |
| -6  | 6 | 6 | 3524.95   | 3852.51   | 149.53 o  |
| -5  | 6 | 6 | 0.34      | 26.39     | 13.19 <   |
| -4  | 6 | 6 | 61532.10  | 60406.60  | 1897.67 o |
| -3  | 6 | 6 | 195.79    | 175.91    | 37.38 o   |
| -2  | 6 | 6 | 37099.20  | 39422.30  | 1242.39 o |
| -1  | 6 | 6 | 141.75    | 131.93    | 13.19 o   |
| 0   | 6 | 6 | 116988.00 | 117251.00 | 4663.92 o |
| 1   | 6 | 6 | 0.08      | 4.40      | 59.37 <   |
| 2   | 6 | 6 | 44910.90  | 45418.80  | 2034.00 o |
| 3   | 6 | 6 | 208.36    | 230.89    | 24.19 o   |
| 4   | 6 | 6 | 3340.90   | 3498.49   | 134.13 o  |
| 5   | 6 | 6 | 1346.64   | 1444.69   | 52.77 o   |
| 6   | 6 | 6 | 6606.09   | 6557.19   | 219.89 o  |
| 7   | 6 | 6 | 5361.71   | 5921.70   | 226.49 o  |
| 8   | 6 | 6 | 12068.50  | 12186.40  | 391.41 o  |
| 9   | 6 | 6 | 1429.20   | 1504.06   | 59.37 o   |
| 10  | 6 | 6 | 26854.80  | 28893.90  | 916.95 o  |
| 11  | 6 | 6 | 7543.74   | 8309.73   | 274.86 o  |
| 12  | 6 | 6 | 138.13    | 140.73    | 17.59 o   |
| 13  | 6 | 6 | 19.34     | 17.59     | 13.19 <   |
| 14  | 6 | 6 | 815.65    | 697.06    | 37.38 o   |
| 15  | 6 | 6 | 247.29    | 250.68    | 26.39 o   |
| 16  | 6 | 6 | 983.67    | 1007.11   | 50.58 o   |
| 17  | 6 | 6 | 41.88     | 28.59     | 17.59 <   |
| 18  | 6 | 6 | 976.42    | 525.54    | 46.18 o   |
| -19 | 7 | 6 | 241.39    | 156.12    | 35.18 o   |
| -18 | 7 | 6 | 717.71    | 536.54    | 46.18 o   |
| -17 | 7 | 6 | 1764.48   | 1693.17   | 70.37 o   |
| -16 | 7 | 6 | 555.57    | 593.71    | 39.58 o   |
| -15 | 7 | 6 | 89.32     | 134.13    | 26.39 o   |
| -14 | 7 | 6 | 535.18    | 536.54    | 32.98 o   |
| -13 | 7 | 6 | 1385.15   | 1556.84   | 63.77 o   |
| -12 | 7 | 6 | 798.25    | 993.91    | 46.18 o   |
| -11 | 7 | 6 | 521.43    | 569.52    | 213.30 <  |
| -10 | 7 | 6 | 6471.08   | 8129.42   | 285.86 o  |
| -9  | 7 | 6 | 43224.20  | 49506.60  | 1567.83 o |
| -8  | 7 | 6 | 1015.58   | 1037.89   | 46.18 o   |
| -7  | 7 | 6 | 11313.60  | 11979.70  | 444.18 o  |
| -6  | 7 | 6 | 88.41     | 90.16     | 17.59 o   |
| -5  | 7 | 6 | 78.22     | 103.35    | 21.99 o   |
| -4  | 7 | 6 | 2074.93   | 1919.66   | 72.56 o   |
| -3  | 7 | 6 | 17651.20  | 17026.30  | 626.69 o  |
| -2  | 7 | 6 | 688.58    | 749.83    | 32.98 o   |
| -1  | 7 | 6 | 7459.42   | 7905.13   | 294.66 o  |
| 0   | 7 | 6 | 317.28    | 246.28    | 15.39 o   |
| 1   | 7 | 6 | 4701.02   | 4558.37   | 169.32 o  |
| 2   | 7 | 6 | 167.48    | 164.92    | 43.98 o   |
| 3   | 7 | 6 | 9726.46   | 9464.17   | 312.25 o  |
| 4   | 7 | 6 | 1719.90   | 1539.25   | 57.17 o   |
| 5   | 7 | 6 | 28478.00  | 29047.80  | 916.95 o  |
| 6   | 7 | 6 | 80.38     | 63.77     | 13.19 o   |
| 7   | 7 | 6 | 39213.20  | 42953.80  | 1559.04 o |
| 8   | 7 | 6 | 1974.45   | 2049.40   | 98.95 o   |

## regerite.cif

|     |   |   |          |          |          |
|-----|---|---|----------|----------|----------|
| 9   | 7 | 6 | 5207.43  | 5697.41  | 215.49 o |
| 10  | 7 | 6 | 2436.33  | 2508.97  | 90.16 o  |
| 11  | 7 | 6 | 2861.96  | 2981.74  | 123.14 o |
| 12  | 7 | 6 | 64.94    | 61.57    | 13.19 o  |
| 13  | 7 | 6 | 5045.65  | 5319.20  | 180.31 o |
| 14  | 7 | 6 | 517.95   | 598.11   | 35.18 o  |
| 15  | 7 | 6 | 4201.89  | 4109.79  | 145.13 o |
| 16  | 7 | 6 | 1979.50  | 1831.70  | 74.76 o  |
| 17  | 7 | 6 | 516.31   | 430.99   | 35.18 o  |
| -18 | 8 | 6 | 1065.23  | 589.31   | 54.97 o  |
| -17 | 8 | 6 | 25.05    | 0.00     | 19.79 <  |
| -16 | 8 | 6 | 491.13   | 459.58   | 30.78 o  |
| -15 | 8 | 6 | 1051.84  | 1121.45  | 52.77 o  |
| -14 | 8 | 6 | 107.14   | 112.14   | 17.59 o  |
| -13 | 8 | 6 | 74.24    | 134.13   | 19.79 o  |
| -12 | 8 | 6 | 11.80    | 37.38    | 114.34 < |
| -11 | 8 | 6 | 675.62   | 813.60   | 41.78 o  |
| -10 | 8 | 6 | 12495.10 | 15964.20 | 514.55 o |
| -9  | 8 | 6 | 5683.04  | 6506.62  | 244.08 o |
| -8  | 8 | 6 | 3131.82  | 3524.87  | 123.14 o |
| -7  | 8 | 6 | 22.44    | 17.59    | 15.39 <  |
| -6  | 8 | 6 | 38.37    | 61.57    | 21.99 <  |
| -5  | 8 | 6 | 125.53   | 85.76    | 30.78 <  |
| -4  | 8 | 6 | 1151.77  | 1095.06  | 48.38 o  |
| -3  | 8 | 6 | 446.21   | 384.81   | 24.19 o  |
| -2  | 8 | 6 | 4.52     | 10.99    | 8.80 <   |
| -1  | 8 | 6 | 580.86   | 604.70   | 30.78 o  |
| 0   | 8 | 6 | 15366.90 | 15363.90 | 490.36 o |
| 1   | 8 | 6 | 365.73   | 299.05   | 120.94 < |
| 2   | 8 | 6 | 8033.00  | 8595.59  | 307.85 o |
| 3   | 8 | 6 | 1912.21  | 1776.73  | 76.96 o  |
| 4   | 8 | 6 | 2025.07  | 2152.75  | 79.16 o  |
| 5   | 8 | 6 | 729.43   | 723.45   | 32.98 o  |
| 6   | 8 | 6 | 454.62   | 457.38   | 54.97 o  |
| 7   | 8 | 6 | 51.64    | 37.38    | 13.19 <  |
| 8   | 8 | 6 | 352.42   | 321.04   | 30.78 o  |
| 9   | 8 | 6 | 2.10     | 15.39    | 15.39 <  |
| 10  | 8 | 6 | 3784.66  | 3656.81  | 138.53 o |
| 11  | 8 | 6 | 1654.62  | 1657.99  | 65.97 o  |
| 12  | 8 | 6 | 147.61   | 147.33   | 17.59 o  |
| 13  | 8 | 6 | 2374.21  | 2469.39  | 94.55 o  |
| 14  | 8 | 6 | 456.64   | 450.78   | 35.18 o  |
| 15  | 8 | 6 | 137.59   | 114.34   | 19.79 o  |
| 16  | 8 | 6 | 1418.92  | 1059.88  | 57.17 o  |
| 17  | 8 | 6 | 1059.51  | 644.28   | 43.98 o  |
| -18 | 9 | 6 | 241.98   | 70.37    | 24.19 <  |
| -17 | 9 | 6 | 1004.05  | 978.52   | 48.38 o  |
| -16 | 9 | 6 | 203.39   | 230.89   | 32.98 o  |
| -15 | 9 | 6 | 2741.92  | 2953.15  | 109.95 o |
| -14 | 9 | 6 | 127.72   | 140.73   | 24.19 o  |
| -13 | 9 | 6 | 881.87   | 1042.29  | 83.56 o  |
| -12 | 9 | 6 | 66.46    | 90.16    | 21.99 o  |
| -11 | 9 | 6 | 132.78   | 149.53   | 24.19 o  |
| -10 | 9 | 6 | 408.78   | 457.38   | 30.78 o  |

## regerite.cif

|     |    |   |          |          |          |
|-----|----|---|----------|----------|----------|
| -9  | 9  | 6 | 2537.72  | 2706.88  | 98.95 o  |
| -8  | 9  | 6 | 378.00   | 382.61   | 28.59 o  |
| -7  | 9  | 6 | 5128.93  | 5508.30  | 200.10 o |
| -6  | 9  | 6 | 0.31     | 37.38    | 28.59 <  |
| -5  | 9  | 6 | 46.31    | 37.38    | 21.99 <  |
| -4  | 9  | 6 | 11.18    | 37.38    | 107.75 < |
| -3  | 9  | 6 | 894.24   | 791.61   | 35.18 o  |
| -2  | 9  | 6 | 0.64     | 0.00     | 26.39 <  |
| -1  | 9  | 6 | 10946.70 | 10917.70 | 354.03 o |
| 0   | 9  | 6 | 187.13   | 169.32   | 17.59 o  |
| 1   | 9  | 6 | 194.01   | 184.71   | 17.59 o  |
| 2   | 9  | 6 | 0.21     | 6.60     | 19.79 <  |
| 3   | 9  | 6 | 1843.89  | 1853.69  | 136.33 o |
| 4   | 9  | 6 | 59.32    | 61.57    | 10.99 o  |
| 5   | 9  | 6 | 839.15   | 745.43   | 35.18 o  |
| 6   | 9  | 6 | 344.17   | 369.42   | 24.19 o  |
| 7   | 9  | 6 | 4425.84  | 4468.21  | 189.11 o |
| 8   | 9  | 6 | 114.64   | 127.54   | 21.99 o  |
| 9   | 9  | 6 | 2469.49  | 2618.92  | 96.75 o  |
| 10  | 9  | 6 | 979.19   | 993.91   | 46.18 o  |
| 11  | 9  | 6 | 4558.90  | 4837.63  | 178.11 o |
| 12  | 9  | 6 | 15.70    | 19.79    | 13.19 <  |
| 13  | 9  | 6 | 155.06   | 125.34   | 24.19 o  |
| 14  | 9  | 6 | 180.05   | 138.53   | 17.59 o  |
| 15  | 9  | 6 | 702.75   | 668.47   | 37.38 o  |
| 16  | 9  | 6 | 1082.80  | 859.78   | 46.18 o  |
| 17  | 9  | 6 | 6096.92  | 5389.56  | 266.07 o |
| -18 | 10 | 6 | 39.73    | 30.78    | 32.98 <  |
| -17 | 10 | 6 | 53.68    | 76.96    | 21.99 o  |
| -16 | 10 | 6 | 128.50   | 138.53   | 21.99 o  |
| -15 | 10 | 6 | 697.62   | 872.97   | 57.17 o  |
| -14 | 10 | 6 | 1719.41  | 2077.98  | 96.75 o  |
| -13 | 10 | 6 | 271.73   | 336.43   | 28.59 o  |
| -12 | 10 | 6 | 2008.22  | 2546.35  | 96.75 o  |
| -11 | 10 | 6 | 1145.97  | 1380.92  | 59.37 o  |
| -10 | 10 | 6 | 4114.55  | 4798.05  | 162.72 o |
| -9  | 10 | 6 | 85.02    | 79.16    | 17.59 o  |
| -8  | 10 | 6 | 1414.82  | 1618.41  | 68.17 o  |
| -7  | 10 | 6 | 132.95   | 160.52   | 19.79 o  |
| -6  | 10 | 6 | 3324.99  | 3258.80  | 116.54 o |
| -5  | 10 | 6 | 340.73   | 296.86   | 41.78 o  |
| -4  | 10 | 6 | 160.23   | 164.92   | 19.79 o  |
| -3  | 10 | 6 | 207.82   | 226.49   | 24.19 o  |
| -2  | 10 | 6 | 23855.50 | 24309.10 | 771.82 o |
| -1  | 10 | 6 | 1.00     | 191.31   | 103.35 < |
| 0   | 10 | 6 | 5966.47  | 5849.14  | 195.70 o |
| 1   | 10 | 6 | 128.26   | 76.96    | 63.77 <  |
| 2   | 10 | 6 | 45.56    | 54.97    | 21.99 <  |
| 3   | 10 | 6 | 935.20   | 923.55   | 46.18 o  |
| 4   | 10 | 6 | 9556.68  | 9996.31  | 351.83 o |
| 5   | 10 | 6 | 49.70    | 72.56    | 17.59 o  |
| 6   | 10 | 6 | 8526.63  | 9314.64  | 301.25 o |
| 7   | 10 | 6 | 235.00   | 226.49   | 21.99 o  |
| 8   | 10 | 6 | 2835.07  | 3315.98  | 116.54 o |

## regerite.cif

|     |    |   |          |          |          |
|-----|----|---|----------|----------|----------|
| 9   | 10 | 6 | 121.21   | 169.32   | 19.79 o  |
| 10  | 10 | 6 | 3629.89  | 4024.03  | 140.73 o |
| 11  | 10 | 6 | 4.50     | 26.39    | 15.39 <  |
| 12  | 10 | 6 | 3333.52  | 3716.18  | 142.93 o |
| 13  | 10 | 6 | 34.48    | 48.38    | 15.39 o  |
| 14  | 10 | 6 | 23.52    | 28.59    | 15.39 <  |
| 15  | 10 | 6 | 0.10     | 19.79    | 15.39 <  |
| 16  | 10 | 6 | 2188.48  | 1836.10  | 118.74 o |
| -17 | 11 | 6 | 753.06   | 582.72   | 50.58 o  |
| -16 | 11 | 6 | 1675.15  | 1902.07  | 81.36 o  |
| -15 | 11 | 6 | 2563.41  | 3206.03  | 125.34 o |
| -14 | 11 | 6 | 79.62    | 127.54   | 21.99 o  |
| -13 | 11 | 6 | 14467.20 | 18728.20 | 653.08 o |
| -12 | 11 | 6 | 85.78    | 101.15   | 21.99 o  |
| -11 | 11 | 6 | 19264.20 | 23768.20 | 883.97 o |
| -10 | 11 | 6 | 245.18   | 257.27   | 28.59 o  |
| -9  | 11 | 6 | 359.52   | 318.84   | 87.96 o  |
| -8  | 11 | 6 | 152.73   | 171.52   | 28.59 o  |
| -7  | 11 | 6 | 228.16   | 294.66   | 46.18 o  |
| -6  | 11 | 6 | 185.90   | 160.52   | 28.59 o  |
| -5  | 11 | 6 | 3006.35  | 3225.82  | 129.74 o |
| -4  | 11 | 6 | 17.19    | 8.80     | 13.19 <  |
| -3  | 11 | 6 | 3959.93  | 4125.18  | 140.73 o |
| -2  | 11 | 6 | 19.20    | 10.99    | 13.19 <  |
| -1  | 11 | 6 | 0.09     | 2.20     | 19.79 <  |
| 0   | 11 | 6 | 238.44   | 226.49   | 26.39 o  |
| 1   | 11 | 6 | 3428.00  | 3384.14  | 131.93 o |
| 2   | 11 | 6 | 34.92    | 35.18    | 32.98 <  |
| 3   | 11 | 6 | 3024.01  | 3078.49  | 145.13 o |
| 4   | 11 | 6 | 213.87   | 213.30   | 32.98 o  |
| 5   | 11 | 6 | 12965.50 | 13391.40 | 501.36 o |
| 6   | 11 | 6 | 249.38   | 257.27   | 19.79 o  |
| 7   | 11 | 6 | 516.68   | 481.56   | 30.78 o  |
| 8   | 11 | 6 | 0.91     | 10.99    | 15.39 <  |
| 9   | 11 | 6 | 3799.05  | 3988.85  | 138.53 o |
| 10  | 11 | 6 | 286.14   | 259.47   | 24.19 o  |
| 11  | 11 | 6 | 232.34   | 255.07   | 24.19 o  |
| 12  | 11 | 6 | 1914.13  | 2045.00  | 123.14 o |
| 13  | 11 | 6 | 2700.76  | 2992.74  | 125.34 o |
| 14  | 11 | 6 | 660.89   | 505.75   | 32.98 o  |
| 15  | 11 | 6 | 1584.02  | 1301.76  | 65.97 o  |
| 16  | 11 | 6 | 9.84     | 4.40     | 26.39 <  |
| -17 | 12 | 6 | 698.13   | 481.56   | 70.37 o  |
| -16 | 12 | 6 | 5285.93  | 6634.15  | 285.86 o |
| -15 | 12 | 6 | 182.10   | 239.68   | 26.39 o  |
| -14 | 12 | 6 | 2326.81  | 2473.79  | 114.34 o |
| -13 | 12 | 6 | 1120.52  | 1330.35  | 61.57 o  |
| -12 | 12 | 6 | 5.77     | 48.38    | 19.79 <  |
| -11 | 12 | 6 | 3515.71  | 3812.93  | 136.33 o |
| -10 | 12 | 6 | 487.93   | 494.76   | 35.18 o  |
| -9  | 12 | 6 | 90.54    | 96.75    | 21.99 o  |
| -8  | 12 | 6 | 20148.20 | 22127.80 | 712.45 o |
| -7  | 12 | 6 | 2662.05  | 2867.40  | 105.55 o |
| -6  | 12 | 6 | 17083.60 | 18613.90 | 688.26 o |

## regerite.cif

|     |    |   |          |          |         |   |
|-----|----|---|----------|----------|---------|---|
| -5  | 12 | 6 | 1078.44  | 936.74   | 48.38   | o |
| -4  | 12 | 6 | 4695.47  | 4918.99  | 169.32  | o |
| -3  | 12 | 6 | 630.92   | 598.11   | 37.38   | o |
| -2  | 12 | 6 | 3979.64  | 3850.32  | 217.69  | o |
| -1  | 12 | 6 | 506.52   | 479.36   | 149.53  | o |
| 0   | 12 | 6 | 953.58   | 892.76   | 43.98   | o |
| 1   | 12 | 6 | 270.12   | 336.43   | 68.17   | o |
| 2   | 12 | 6 | 376.52   | 338.63   | 52.77   | o |
| 3   | 12 | 6 | 0.00     | -6.60    | 28.59   | < |
| 4   | 12 | 6 | 8499.71  | 8745.12  | 338.63  | o |
| 5   | 12 | 6 | 1.34     | 32.98    | 21.99   | < |
| 6   | 12 | 6 | 852.75   | 793.81   | 41.78   | o |
| 7   | 12 | 6 | 5547.71  | 6181.17  | 206.70  | o |
| 8   | 12 | 6 | 1059.71  | 1134.64  | 50.58   | o |
| 9   | 12 | 6 | 2716.37  | 2517.77  | 98.95   | o |
| 10  | 12 | 6 | 46.97    | 37.38    | 15.39   | < |
| 11  | 12 | 6 | 25.28    | 26.39    | 19.79   | < |
| 12  | 12 | 6 | 1676.49  | 1741.55  | 87.96   | o |
| 13  | 12 | 6 | 903.94   | 912.55   | 46.18   | o |
| 14  | 12 | 6 | 4147.86  | 3320.37  | 127.54  | o |
| 15  | 12 | 6 | 51.33    | 17.59    | 21.99   | < |
| -16 | 13 | 6 | 4145.55  | 6304.31  | 338.63  | o |
| -15 | 13 | 6 | 1671.71  | 1646.99  | 81.36   | o |
| -14 | 13 | 6 | 182.82   | 118.74   | 26.39   | o |
| -13 | 13 | 6 | 81.52    | 116.54   | 21.99   | o |
| -12 | 13 | 6 | 22.10    | 32.98    | 17.59   | < |
| -11 | 13 | 6 | 779.39   | 802.61   | 43.98   | o |
| -10 | 13 | 6 | 1.20     | 13.19    | 15.39   | < |
| -9  | 13 | 6 | 673.82   | 738.84   | 43.98   | o |
| -8  | 13 | 6 | 3874.82  | 4371.46  | 162.72  | o |
| -7  | 13 | 6 | 16321.10 | 16744.80 | 538.74  | o |
| -6  | 13 | 6 | 1967.66  | 2049.40  | 96.75   | o |
| -5  | 13 | 6 | 19197.30 | 20889.80 | 778.42  | o |
| -4  | 13 | 6 | 0.12     | -6.60    | 39.58   | < |
| -3  | 13 | 6 | 1456.96  | 1413.91  | 83.56   | o |
| -2  | 13 | 6 | 276.81   | 252.88   | 26.39   | o |
| -1  | 13 | 6 | 1108.77  | 1145.64  | 63.77   | o |
| 0   | 13 | 6 | 25.63    | 37.38    | 52.77   | < |
| 1   | 13 | 6 | 6002.48  | 6401.07  | 213.30  | o |
| 2   | 13 | 6 | 1729.20  | 1957.04  | 79.16   | o |
| 3   | 13 | 6 | 52743.70 | 55390.90 | 2016.41 | o |
| 4   | 13 | 6 | 558.76   | 496.96   | 41.78   | o |
| 5   | 13 | 6 | 16679.20 | 18233.50 | 582.72  | o |
| 6   | 13 | 6 | 3.77     | 21.99    | 13.19   | < |
| 7   | 13 | 6 | 21275.10 | 23431.70 | 738.84  | o |
| 8   | 13 | 6 | 619.00   | 723.45   | 37.38   | o |
| 9   | 13 | 6 | 7025.40  | 7326.81  | 244.08  | o |
| 10  | 13 | 6 | 975.97   | 846.59   | 50.58   | o |
| 11  | 13 | 6 | 130.30   | 127.54   | 24.19   | o |
| 12  | 13 | 6 | 4687.13  | 4813.44  | 169.32  | o |
| 13  | 13 | 6 | 237.46   | 219.89   | 26.39   | o |
| 14  | 13 | 6 | 2812.41  | 2174.74  | 127.54  | o |
| 15  | 13 | 6 | 9.05     | 28.59    | 26.39   | < |
| -16 | 14 | 6 | 466.64   | 246.28   | 54.97   | o |

## regerite.cif

|     |    |   |          |          |          |
|-----|----|---|----------|----------|----------|
| -15 | 14 | 6 | 175.35   | 125.34   | 32.98 o  |
| -14 | 14 | 6 | 190.14   | 175.91   | 26.39 o  |
| -13 | 14 | 6 | 351.27   | 402.40   | 30.78 o  |
| -12 | 14 | 6 | 104.56   | 107.75   | 19.79 o  |
| -11 | 14 | 6 | 38.81    | 17.59    | 15.39 <  |
| -10 | 14 | 6 | 76.66    | 83.56    | 17.59 o  |
| -9  | 14 | 6 | 2.56     | 4.40     | 17.59 <  |
| -8  | 14 | 6 | 1161.78  | 1273.18  | 81.36 o  |
| -7  | 14 | 6 | 3.00     | 4.40     | 13.19 <  |
| -6  | 14 | 6 | 535.49   | 569.52   | 32.98 o  |
| -5  | 14 | 6 | 1.46     | 19.79    | 13.19 <  |
| -4  | 14 | 6 | 4763.43  | 5165.27  | 178.11 o |
| -3  | 14 | 6 | 75.76    | 70.37    | 65.97 <  |
| -2  | 14 | 6 | 24317.00 | 29025.80 | 927.95 o |
| -1  | 14 | 6 | 214.54   | 219.89   | 57.17 o  |
| 0   | 14 | 6 | 15719.40 | 16298.40 | 523.34 o |
| 1   | 14 | 6 | 806.45   | 828.99   | 120.94 o |
| 2   | 14 | 6 | 4088.75  | 4237.33  | 156.12 o |
| 3   | 14 | 6 | 249.53   | 266.07   | 32.98 o  |
| 4   | 14 | 6 | 6244.35  | 6794.67  | 228.69 o |
| 5   | 14 | 6 | 343.27   | 303.45   | 211.10 < |
| 6   | 14 | 6 | 3501.06  | 3326.97  | 120.94 o |
| 7   | 14 | 6 | 1643.48  | 1640.40  | 252.88 o |
| 8   | 14 | 6 | 1480.46  | 1431.50  | 61.57 o  |
| 9   | 14 | 6 | 145.49   | 138.53   | 21.99 o  |
| 10  | 14 | 6 | 1679.32  | 1519.46  | 114.34 o |
| 11  | 14 | 6 | 1.86     | -17.59   | 13.19 <  |
| 12  | 14 | 6 | 6884.47  | 6755.09  | 349.63 o |
| 13  | 14 | 6 | 409.98   | 305.65   | 26.39 o  |
| 14  | 14 | 6 | 1735.76  | 1235.80  | 98.95 o  |
| -15 | 15 | 6 | 154.76   | 138.53   | 32.98 o  |
| -14 | 15 | 6 | 828.06   | 538.74   | 54.97 o  |
| -13 | 15 | 6 | 4849.06  | 5158.68  | 204.50 o |
| -12 | 15 | 6 | 1379.34  | 1394.12  | 74.76 o  |
| -11 | 15 | 6 | 322.83   | 239.68   | 24.19 o  |
| -10 | 15 | 6 | 2.55     | 28.59    | 17.59 <  |
| -9  | 15 | 6 | 746.79   | 650.88   | 37.38 o  |
| -8  | 15 | 6 | 149.35   | 127.54   | 19.79 o  |
| -7  | 15 | 6 | 315.39   | 228.69   | 24.19 o  |
| -6  | 15 | 6 | 14.17    | 4.40     | 72.56 <  |
| -5  | 15 | 6 | 6073.59  | 6730.91  | 224.29 o |
| -4  | 15 | 6 | 134.09   | 127.54   | 17.59 o  |
| -3  | 15 | 6 | 15715.60 | 18167.50 | 582.72 o |
| -2  | 15 | 6 | 152.89   | 178.11   | 21.99 o  |
| -1  | 15 | 6 | 375.41   | 459.58   | 37.38 o  |
| 0   | 15 | 6 | 231.86   | 206.70   | 21.99 o  |
| 1   | 15 | 6 | 327.18   | 255.07   | 24.19 o  |
| 2   | 15 | 6 | 310.68   | 312.25   | 26.39 o  |
| 3   | 15 | 6 | 410.21   | 406.80   | 35.18 o  |
| 4   | 15 | 6 | 7.34     | -6.60    | 21.99 <  |
| 5   | 15 | 6 | 6621.08  | 7254.25  | 241.88 o |
| 6   | 15 | 6 | 987.03   | 886.17   | 109.95 o |
| 7   | 15 | 6 | 1754.25  | 1657.99  | 72.56 o  |
| 8   | 15 | 6 | 174.40   | 226.49   | 26.39 o  |

## regerite.cif

|     |    |   |         |         |          |
|-----|----|---|---------|---------|----------|
| 9   | 15 | 6 | 836.80  | 793.81  | 50.58 o  |
| 10  | 15 | 6 | 44.56   | 30.78   | 15.39 <  |
| 11  | 15 | 6 | 313.19  | 228.69  | 24.19 o  |
| 12  | 15 | 6 | 83.33   | 61.57   | 17.59 o  |
| 13  | 15 | 6 | 1944.16 | 1499.67 | 103.35 o |
| -14 | 16 | 6 | 9045.33 | 7161.89 | 393.61 o |
| -13 | 16 | 6 | 13.16   | 50.58   | 26.39 <  |
| -12 | 16 | 6 | 7268.93 | 7344.41 | 351.83 o |
| -11 | 16 | 6 | 95.94   | 90.16   | 24.19 o  |
| -10 | 16 | 6 | 1253.33 | 1284.17 | 59.37 o  |
| -9  | 16 | 6 | 45.21   | 48.38   | 15.39 o  |
| -8  | 16 | 6 | 1221.00 | 1224.80 | 68.17 o  |
| -7  | 16 | 6 | 20.35   | 19.79   | 13.19 <  |
| -6  | 16 | 6 | 838.45  | 659.68  | 63.77 o  |
| -5  | 16 | 6 | 282.27  | 274.86  | 26.39 o  |
| -4  | 16 | 6 | 3129.32 | 3454.51 | 125.34 o |
| -3  | 16 | 6 | 26.73   | 32.98   | 15.39 <  |
| -2  | 16 | 6 | 1339.01 | 1402.91 | 61.57 o  |
| -1  | 16 | 6 | 249.15  | 224.29  | 24.19 o  |
| 0   | 16 | 6 | 818.99  | 883.97  | 43.98 o  |
| 1   | 16 | 6 | 15.40   | 24.19   | 72.56 <  |
| 2   | 16 | 6 | 4722.21 | 5273.02 | 182.51 o |
| 3   | 16 | 6 | 146.32  | 178.11  | 28.59 o  |
| 4   | 16 | 6 | 10.47   | 4.40    | 21.99 <  |
| 5   | 16 | 6 | 749.42  | 760.83  | 46.18 o  |
| 6   | 16 | 6 | 1825.09 | 1761.34 | 87.96 o  |
| 7   | 16 | 6 | 115.31  | 112.14  | 17.59 o  |
| 8   | 16 | 6 | 165.92  | 149.53  | 32.98 o  |
| 9   | 16 | 6 | 0.25    | -2.20   | 15.39 <  |
| 10  | 16 | 6 | 3113.19 | 2994.93 | 114.34 o |
| 11  | 16 | 6 | 5.52    | 4.40    | 15.39 <  |
| 12  | 16 | 6 | 4603.77 | 4853.02 | 452.98 o |
| -13 | 17 | 6 | 999.94  | 455.18  | 145.13 o |
| -12 | 17 | 6 | 539.67  | 336.43  | 35.18 o  |
| -11 | 17 | 6 | 571.14  | 468.37  | 41.78 o  |
| -10 | 17 | 6 | 67.53   | 85.76   | 21.99 o  |
| -9  | 17 | 6 | 1625.10 | 1855.89 | 83.56 o  |
| -8  | 17 | 6 | 83.52   | 103.35  | 17.59 o  |
| -7  | 17 | 6 | 413.44  | 367.22  | 28.59 o  |
| -6  | 17 | 6 | 2.07    | 4.40    | 17.59 <  |
| -5  | 17 | 6 | 139.22  | 116.54  | 17.59 o  |
| -4  | 17 | 6 | 57.62   | 48.38   | 17.59 <  |
| -3  | 17 | 6 | 3412.88 | 4294.50 | 175.91 o |
| -2  | 17 | 6 | 610.52  | 672.87  | 50.58 o  |
| -1  | 17 | 6 | 821.72  | 741.04  | 46.18 o  |
| 0   | 17 | 6 | 196.92  | 239.68  | 147.33 < |
| 1   | 17 | 6 | 3406.96 | 3538.07 | 131.93 o |
| 2   | 17 | 6 | 491.83  | 490.36  | 103.35 o |
| 3   | 17 | 6 | 375.06  | 340.83  | 35.18 o  |
| 4   | 17 | 6 | 0.37    | -2.20   | 30.78 <  |
| 5   | 17 | 6 | 324.96  | 292.46  | 26.39 o  |
| 6   | 17 | 6 | 312.53  | 301.25  | 32.98 o  |
| 7   | 17 | 6 | 45.49   | 96.75   | 26.39 o  |
| 8   | 17 | 6 | 255.42  | 296.86  | 30.78 o  |



## regerite.cif

|     |    |   |         |         |          |
|-----|----|---|---------|---------|----------|
| 9   | 17 | 6 | 78.90   | 28.59   | 21.99 <  |
| 10  | 17 | 6 | 232.62  | 193.51  | 30.78 o  |
| 11  | 17 | 6 | 59.44   | 61.57   | 32.98 <  |
| -12 | 18 | 6 | 145.77  | 72.56   | 24.19 <  |
| -11 | 18 | 6 | 27.89   | 43.98   | 19.79 <  |
| -10 | 18 | 6 | 3203.72 | 3107.08 | 164.92 o |
| -9  | 18 | 6 | 761.52  | 798.21  | 50.58 o  |
| -8  | 18 | 6 | 2585.83 | 2825.62 | 116.54 o |
| -7  | 18 | 6 | 49.12   | 48.38   | 15.39 o  |
| -6  | 18 | 6 | 7975.92 | 9011.19 | 301.25 o |
| -5  | 18 | 6 | 745.82  | 741.04  | 41.78 o  |
| -4  | 18 | 6 | 4707.22 | 5235.64 | 191.31 o |
| -3  | 18 | 6 | 307.67  | 380.41  | 28.59 o  |
| -2  | 18 | 6 | 1117.55 | 1055.48 | 70.37 o  |
| -1  | 18 | 6 | 53.39   | 63.77   | 19.79 o  |
| 0   | 18 | 6 | 2455.96 | 2394.63 | 105.55 o |
| 1   | 18 | 6 | 34.52   | 50.58   | 70.37 <  |
| 2   | 18 | 6 | 20.96   | 30.78   | 15.39 <  |
| 3   | 18 | 6 | 44.65   | 68.17   | 17.59 o  |
| 4   | 18 | 6 | 70.28   | 48.38   | 19.79 <  |
| 5   | 18 | 6 | 114.33  | 140.73  | 19.79 o  |
| 6   | 18 | 6 | 1030.71 | 921.35  | 46.18 o  |
| 7   | 18 | 6 | 68.70   | 61.57   | 17.59 o  |
| 8   | 18 | 6 | 707.67  | 633.29  | 37.38 o  |
| 9   | 18 | 6 | 1249.59 | 1099.46 | 61.57 o  |
| 10  | 18 | 6 | 415.80  | 239.68  | 46.18 o  |
| -11 | 19 | 6 | 5706.57 | 5099.30 | 336.43 o |
| -10 | 19 | 6 | 376.68  | 169.32  | 28.59 o  |
| -9  | 19 | 6 | 3953.99 | 2968.55 | 189.11 o |
| -8  | 19 | 6 | 559.13  | 481.56  | 37.38 o  |
| -7  | 19 | 6 | 77.59   | 52.77   | 17.59 o  |
| -6  | 19 | 6 | 257.79  | 241.88  | 24.19 o  |
| -5  | 19 | 6 | 228.24  | 162.72  | 19.79 o  |
| -4  | 19 | 6 | 1090.39 | 1040.09 | 52.77 o  |
| -3  | 19 | 6 | 5450.63 | 6770.49 | 228.69 o |
| -2  | 19 | 6 | 420.10  | 422.19  | 30.78 o  |
| -1  | 19 | 6 | 3018.55 | 3010.33 | 114.34 o |
| 0   | 19 | 6 | 645.57  | 646.48  | 39.58 o  |
| 1   | 19 | 6 | 614.48  | 529.94  | 35.18 o  |
| 2   | 19 | 6 | 20.67   | 37.38   | 15.39 <  |
| 3   | 19 | 6 | 29.36   | 54.97   | 17.59 o  |
| 4   | 19 | 6 | 496.63  | 419.99  | 30.78 o  |
| 5   | 19 | 6 | 1412.06 | 1288.57 | 59.37 o  |
| 6   | 19 | 6 | 307.89  | 277.06  | 24.19 o  |
| 7   | 19 | 6 | 308.14  | 261.67  | 30.78 o  |
| 8   | 19 | 6 | 9.83    | 30.78   | 21.99 <  |
| 9   | 19 | 6 | 1718.38 | 1356.74 | 96.75 o  |
| -9  | 20 | 6 | 37.64   | 17.59   | 24.19 <  |
| -8  | 20 | 6 | 323.41  | 151.73  | 30.78 o  |
| -7  | 20 | 6 | 338.16  | 105.55  | 30.78 o  |
| -6  | 20 | 6 | 3202.68 | 2755.25 | 156.12 o |
| -5  | 20 | 6 | 227.07  | 193.51  | 26.39 o  |
| -4  | 20 | 6 | 4501.49 | 4340.68 | 160.52 o |
| -3  | 20 | 6 | 209.93  | 239.68  | 43.98 o  |

## regerite.cif

|     |    |   |          |          |         |   |
|-----|----|---|----------|----------|---------|---|
| -2  | 20 | 6 | 5990.77  | 6222.95  | 215.49  | o |
| -1  | 20 | 6 | 19.84    | 4.40     | 215.49  | < |
| 0   | 20 | 6 | 13337.80 | 14565.70 | 479.36  | o |
| 1   | 20 | 6 | 66.00    | 28.59    | 549.73  | < |
| 2   | 20 | 6 | 3016.15  | 3016.92  | 125.34  | o |
| 3   | 20 | 6 | 38.76    | 19.79    | 17.59   | < |
| 4   | 20 | 6 | 5.43     | 13.19    | 17.59   | < |
| 5   | 20 | 6 | 480.42   | 389.21   | 37.38   | o |
| 6   | 20 | 6 | 74.46    | 76.96    | 24.19   | o |
| 7   | 20 | 6 | 503.95   | 391.41   | 57.17   | o |
| -7  | 21 | 6 | 43.85    | 19.79    | 26.39   | < |
| -6  | 21 | 6 | 118.90   | 48.38    | 24.19   | < |
| -5  | 21 | 6 | 33.21    | 46.18    | 19.79   | < |
| -4  | 21 | 6 | 132.59   | 118.74   | 30.78   | o |
| -3  | 21 | 6 | 237.82   | 103.35   | 50.58   | < |
| -2  | 21 | 6 | 58.91    | 57.17    | 28.59   | < |
| -1  | 21 | 6 | 1226.23  | 756.43   | 59.37   | o |
| 0   | 21 | 6 | 143.83   | 127.54   | 28.59   | o |
| 1   | 21 | 6 | 322.94   | 272.67   | 35.18   | o |
| 2   | 21 | 6 | 261.96   | 233.09   | 32.98   | o |
| 3   | 21 | 6 | 769.62   | 488.16   | 48.38   | o |
| 4   | 21 | 6 | 491.55   | 292.46   | 52.77   | o |
| 5   | 21 | 6 | 2373.80  | 2053.79  | 140.73  | o |
| -3  | 22 | 6 | 424.81   | 261.67   | 39.58   | o |
| -2  | 22 | 6 | 1294.08  | 692.66   | 61.57   | o |
| -1  | 22 | 6 | 19.00    | -28.59   | 404.60  | < |
| 0   | 22 | 6 | 5798.49  | 5464.33  | 378.21  | o |
| 1   | 22 | 6 | 116.08   | 127.54   | 32.98   | o |
| 2   | 22 | 6 | 1973.32  | 1319.35  | 118.74  | o |
| -19 | 1  | 7 | 166.91   | 131.93   | 21.99   | o |
| -18 | 1  | 7 | 225.11   | 171.52   | 21.99   | o |
| -17 | 1  | 7 | 164.21   | 153.93   | 21.99   | o |
| -16 | 1  | 7 | 13773.60 | 14196.30 | 525.54  | o |
| -15 | 1  | 7 | 184.45   | 153.93   | 17.59   | o |
| -14 | 1  | 7 | 3827.40  | 3500.69  | 123.14  | o |
| -13 | 1  | 7 | 196.78   | 158.32   | 24.19   | o |
| -12 | 1  | 7 | 1362.06  | 1290.77  | 61.57   | o |
| -11 | 1  | 7 | 2147.54  | 2071.39  | 76.96   | o |
| -10 | 1  | 7 | 2037.70  | 2227.51  | 79.16   | o |
| -9  | 1  | 7 | 548.45   | 468.37   | 26.39   | o |
| -8  | 1  | 7 | 4596.77  | 4771.66  | 156.12  | o |
| -7  | 1  | 7 | 186.47   | 138.53   | 76.96   | < |
| -6  | 1  | 7 | 20688.10 | 20227.90 | 639.89  | o |
| -5  | 1  | 7 | 444.11   | 395.81   | 21.99   | o |
| -4  | 1  | 7 | 465.77   | 474.97   | 21.99   | o |
| -3  | 1  | 7 | 57.33    | 85.76    | 15.39   | o |
| -2  | 1  | 7 | 557.43   | 461.77   | 21.99   | o |
| -1  | 1  | 7 | 1087.96  | 1042.29  | 52.77   | o |
| 0   | 1  | 7 | 2835.71  | 3597.44  | 162.72  | o |
| 1   | 1  | 7 | 112.67   | 109.95   | 10.99   | o |
| 2   | 1  | 7 | 26275.80 | 29230.30 | 1301.76 | o |
| 3   | 1  | 7 | 342.50   | 303.45   | 24.19   | o |
| 4   | 1  | 7 | 3956.12  | 4437.43  | 142.93  | o |
| 5   | 1  | 7 | 237.30   | 246.28   | 15.39   | o |

## regerite.cif

|     |   |   |          |          |          |
|-----|---|---|----------|----------|----------|
| 6   | 1 | 7 | 864.97   | 861.98   | 35.18 o  |
| 7   | 1 | 7 | 10.33    | 6.60     | 8.80 <   |
| 8   | 1 | 7 | 211.76   | 204.50   | 19.79 o  |
| 9   | 1 | 7 | 1534.29  | 1679.98  | 79.16 o  |
| 10  | 1 | 7 | 2312.58  | 2528.76  | 98.95 o  |
| 11  | 1 | 7 | 6.93     | 6.60     | 10.99 <  |
| 12  | 1 | 7 | 1105.79  | 1150.04  | 54.97 o  |
| 13  | 1 | 7 | 27.04    | 48.38    | 30.78 <  |
| 14  | 1 | 7 | 68.84    | 76.96    | 15.39 o  |
| 15  | 1 | 7 | 64.72    | 50.58    | 13.19 o  |
| 16  | 1 | 7 | 404.40   | 274.86   | 24.19 o  |
| 17  | 1 | 7 | 482.94   | 349.63   | 30.78 o  |
| -19 | 2 | 7 | 945.08   | 725.65   | 46.18 o  |
| -18 | 2 | 7 | 2.08     | -13.19   | 10.99 <  |
| -17 | 2 | 7 | 521.71   | 378.21   | 32.98 o  |
| -16 | 2 | 7 | 730.88   | 635.49   | 37.38 o  |
| -15 | 2 | 7 | 2447.70  | 2497.98  | 92.35 o  |
| -14 | 2 | 7 | 153.35   | 167.12   | 17.59 o  |
| -13 | 2 | 7 | 4680.92  | 5020.14  | 169.32 o |
| -12 | 2 | 7 | 1311.71  | 1270.98  | 52.77 o  |
| -11 | 2 | 7 | 1654.12  | 1532.65  | 61.57 o  |
| -10 | 2 | 7 | 355.12   | 325.44   | 21.99 o  |
| -9  | 2 | 7 | 6.66     | 8.80     | 13.19 <  |
| -8  | 2 | 7 | 123.64   | 109.95   | 17.59 o  |
| -7  | 2 | 7 | 5699.11  | 5644.64  | 182.51 o |
| -6  | 2 | 7 | 689.23   | 620.10   | 28.59 o  |
| -5  | 2 | 7 | 474.93   | 441.98   | 24.19 o  |
| -4  | 2 | 7 | 20.83    | 21.99    | 15.39 <  |
| -3  | 2 | 7 | 19378.80 | 20351.00 | 644.28 o |
| -2  | 2 | 7 | 4.43     | -2.20    | 15.39 <  |
| -1  | 2 | 7 | 5128.48  | 5693.01  | 259.47 o |
| 0   | 2 | 7 | 66.14    | 63.77    | 10.99 o  |
| 1   | 2 | 7 | 396.48   | 332.04   | 24.19 o  |
| 2   | 2 | 7 | 31.29    | 39.58    | 13.19 <  |
| 3   | 2 | 7 | 9943.36  | 11687.30 | 534.34 o |
| 4   | 2 | 7 | 77.53    | 74.76    | 15.39 o  |
| 5   | 2 | 7 | 735.43   | 653.08   | 26.39 o  |
| 6   | 2 | 7 | 1461.02  | 1449.09  | 61.57 o  |
| 7   | 2 | 7 | 228.02   | 215.49   | 17.59 o  |
| 8   | 2 | 7 | 865.09   | 888.36   | 46.18 o  |
| 9   | 2 | 7 | 4360.46  | 4923.39  | 191.31 o |
| 10  | 2 | 7 | 1971.47  | 1869.09  | 83.56 o  |
| 11  | 2 | 7 | 1983.43  | 2036.20  | 83.56 o  |
| 12  | 2 | 7 | 407.71   | 413.40   | 35.18 o  |
| 13  | 2 | 7 | 56.88    | 85.76    | 19.79 o  |
| 14  | 2 | 7 | 548.06   | 448.58   | 32.98 o  |
| 15  | 2 | 7 | 353.52   | 307.85   | 26.39 o  |
| 16  | 2 | 7 | 402.00   | 354.03   | 37.38 o  |
| 17  | 2 | 7 | 1736.56  | 1097.26  | 63.77 o  |
| -19 | 3 | 7 | 5179.92  | 3786.55  | 193.51 o |
| -18 | 3 | 7 | 28.43    | 35.18    | 13.19 <  |
| -17 | 3 | 7 | 1558.99  | 1284.17  | 70.37 o  |
| -16 | 3 | 7 | 998.22   | 945.54   | 46.18 o  |
| -15 | 3 | 7 | 871.68   | 793.81   | 39.58 o  |

## regerite.cif

|     |   |   |          |          |         |   |
|-----|---|---|----------|----------|---------|---|
| -14 | 3 | 7 | 94.86    | 92.35    | 15.39   | o |
| -13 | 3 | 7 | 825.17   | 749.83   | 37.38   | o |
| -12 | 3 | 7 | 2068.47  | 2271.49  | 92.35   | o |
| -11 | 3 | 7 | 13.92    | 28.59    | 13.19   | < |
| -10 | 3 | 7 | 8801.61  | 9162.92  | 296.86  | o |
| -9  | 3 | 7 | 3.34     | -4.40    | 10.99   | < |
| -8  | 3 | 7 | 11029.60 | 11511.40 | 424.39  | o |
| -7  | 3 | 7 | 29.07    | 32.98    | 13.19   | < |
| -6  | 3 | 7 | 34325.90 | 35363.10 | 1286.37 | o |
| -5  | 3 | 7 | 55.93    | 52.77    | 21.99   | < |
| -4  | 3 | 7 | 4709.54  | 4872.81  | 182.51  | o |
| -3  | 3 | 7 | 704.78   | 679.47   | 37.38   | o |
| -2  | 3 | 7 | 24474.60 | 28594.80 | 1279.77 | o |
| -1  | 3 | 7 | 483.42   | 466.17   | 32.98   | o |
| 0   | 3 | 7 | 7366.31  | 8171.20  | 373.82  | o |
| 1   | 3 | 7 | 271.71   | 270.47   | 24.19   | o |
| 2   | 3 | 7 | 13057.00 | 12331.60 | 639.89  | o |
| 3   | 3 | 7 | 5.07     | 0.00     | 193.51  | < |
| 4   | 3 | 7 | 55058.80 | 59441.30 | 2636.51 | o |
| 5   | 3 | 7 | 1410.31  | 1350.14  | 57.17   | o |
| 6   | 3 | 7 | 12652.50 | 12437.10 | 395.81  | o |
| 7   | 3 | 7 | 43.47    | 30.78    | 13.19   | < |
| 8   | 3 | 7 | 17974.40 | 18772.20 | 692.66  | o |
| 9   | 3 | 7 | 132.37   | 162.72   | 19.79   | o |
| 10  | 3 | 7 | 2579.22  | 2702.48  | 101.15  | o |
| 11  | 3 | 7 | 53.42    | 54.97    | 13.19   | o |
| 12  | 3 | 7 | 3831.64  | 4516.59  | 153.93  | o |
| 13  | 3 | 7 | 1557.01  | 1679.98  | 76.96   | o |
| 14  | 3 | 7 | 3104.53  | 2937.76  | 140.73  | o |
| 15  | 3 | 7 | 645.45   | 703.66   | 41.78   | o |
| 16  | 3 | 7 | 1762.48  | 1526.05  | 70.37   | o |
| 17  | 3 | 7 | 233.07   | 94.55    | 17.59   | o |
| -19 | 4 | 7 | 1449.61  | 1297.36  | 105.55  | o |
| -18 | 4 | 7 | 103.87   | 96.75    | 15.39   | o |
| -17 | 4 | 7 | 1034.11  | 930.15   | 46.18   | o |
| -16 | 4 | 7 | 568.10   | 514.55   | 32.98   | o |
| -15 | 4 | 7 | 73.25    | 50.58    | 15.39   | o |
| -14 | 4 | 7 | 1078.86  | 1077.47  | 48.38   | o |
| -13 | 4 | 7 | 159.96   | 180.31   | 24.19   | o |
| -12 | 4 | 7 | 2007.58  | 1987.83  | 98.95   | o |
| -11 | 4 | 7 | 4321.06  | 4272.51  | 167.12  | o |
| -10 | 4 | 7 | 5075.64  | 5490.71  | 182.51  | o |
| -9  | 4 | 7 | 2327.26  | 2394.63  | 85.76   | o |
| -8  | 4 | 7 | 1862.19  | 1910.86  | 83.56   | o |
| -7  | 4 | 7 | 1069.10  | 1002.71  | 41.78   | o |
| -6  | 4 | 7 | 394.83   | 435.39   | 24.19   | o |
| -5  | 4 | 7 | 3604.03  | 3403.93  | 131.93  | o |
| -4  | 4 | 7 | 266.77   | 248.48   | 35.18   | o |
| -3  | 4 | 7 | 42171.10 | 42982.40 | 1915.26 | o |
| -2  | 4 | 7 | 273.49   | 301.25   | 26.39   | o |
| -1  | 4 | 7 | 74062.00 | 81248.00 | 3617.23 | o |
| 0   | 4 | 7 | 64.78    | 83.56    | 37.38   | < |
| 1   | 4 | 7 | 26235.70 | 27211.70 | 1216.00 | o |
| 2   | 4 | 7 | 435.82   | 437.59   | 35.18   | o |

## regerite.cif

|     |   |   |          |          |           |
|-----|---|---|----------|----------|-----------|
| 3   | 4 | 7 | 35383.50 | 34589.10 | 1539.25 o |
| 4   | 4 | 7 | 2674.15  | 2924.57  | 208.90 o  |
| 5   | 4 | 7 | 18025.10 | 19478.10 | 615.70 o  |
| 6   | 4 | 7 | 517.42   | 444.18   | 28.59 o   |
| 7   | 4 | 7 | 3921.33  | 3804.14  | 127.54 o  |
| 8   | 4 | 7 | 669.22   | 582.72   | 32.98 o   |
| 9   | 4 | 7 | 4279.33  | 4217.54  | 167.12 o  |
| 10  | 4 | 7 | 1010.47  | 1114.85  | 52.77 o   |
| 11  | 4 | 7 | 1978.80  | 1974.63  | 81.36 o   |
| 12  | 4 | 7 | 99.93    | 105.55   | 17.59 o   |
| 13  | 4 | 7 | 8034.05  | 9107.94  | 343.03 o  |
| 14  | 4 | 7 | 0.31     | 13.19    | 17.59 <   |
| 15  | 4 | 7 | 63.46    | 59.37    | 15.39 o   |
| 16  | 4 | 7 | 64.03    | 50.58    | 17.59 <   |
| 17  | 4 | 7 | 1012.97  | 659.68   | 43.98 o   |
| -19 | 5 | 7 | 2007.95  | 1592.02  | 127.54 o  |
| -18 | 5 | 7 | 7.00     | 28.59    | 13.19 <   |
| -17 | 5 | 7 | 2080.40  | 1946.05  | 79.16 o   |
| -16 | 5 | 7 | 1346.04  | 1141.24  | 76.96 o   |
| -15 | 5 | 7 | 1362.71  | 1246.79  | 61.57 o   |
| -14 | 5 | 7 | 1312.04  | 1205.01  | 54.97 o   |
| -13 | 5 | 7 | 469.14   | 468.37   | 37.38 o   |
| -12 | 5 | 7 | 7872.15  | 8410.88  | 318.84 o  |
| -11 | 5 | 7 | 367.79   | 351.83   | 24.19 o   |
| -10 | 5 | 7 | 18361.10 | 20153.10 | 642.09 o  |
| -9  | 5 | 7 | 270.38   | 305.65   | 26.39 o   |
| -8  | 5 | 7 | 7018.98  | 6981.58  | 228.69 o  |
| -7  | 5 | 7 | 45.77    | 21.99    | 13.19 <   |
| -6  | 5 | 7 | 16363.20 | 17160.40 | 549.73 o  |
| -5  | 5 | 7 | 478.34   | 510.15   | 191.31 <  |
| -4  | 5 | 7 | 2271.29  | 2346.25  | 103.35 o  |
| -3  | 5 | 7 | 11.92    | 21.99    | 13.19 <   |
| -2  | 5 | 7 | 2806.54  | 2783.84  | 138.53 o  |
| -1  | 5 | 7 | 202.69   | 184.71   | 30.78 o   |
| 0   | 5 | 7 | 242.38   | 351.83   | 48.38 o   |
| 1   | 5 | 7 | 317.20   | 321.04   | 191.31 <  |
| 2   | 5 | 7 | 5205.27  | 5910.71  | 285.86 o  |
| 3   | 5 | 7 | 132.35   | 107.75   | 226.49 <  |
| 4   | 5 | 7 | 6.08     | 4.40     | 8.80 <    |
| 5   | 5 | 7 | 264.26   | 277.06   | 19.79 o   |
| 6   | 5 | 7 | 1094.34  | 1257.78  | 79.16 o   |
| 7   | 5 | 7 | 87.02    | 90.16    | 57.17 <   |
| 8   | 5 | 7 | 141.99   | 76.96    | 13.19 o   |
| 9   | 5 | 7 | 309.49   | 257.27   | 24.19 o   |
| 10  | 5 | 7 | 92.26    | 74.76    | 13.19 o   |
| 11  | 5 | 7 | 0.20     | 13.19    | 17.59 <   |
| 12  | 5 | 7 | 191.86   | 200.10   | 19.79 o   |
| 13  | 5 | 7 | 431.10   | 402.40   | 30.78 o   |
| 14  | 5 | 7 | 4647.75  | 4949.78  | 184.71 o  |
| 15  | 5 | 7 | 1.42     | 8.80     | 13.19 <   |
| 16  | 5 | 7 | 1644.71  | 1488.67  | 70.37 o   |
| 17  | 5 | 7 | 179.60   | 109.95   | 21.99 o   |
| -18 | 6 | 7 | 358.01   | 305.65   | 26.39 o   |
| -17 | 6 | 7 | 2979.34  | 2577.14  | 98.95 o   |

## regerite.cif

|     |   |   |          |          |          |
|-----|---|---|----------|----------|----------|
| -16 | 6 | 7 | 945.66   | 894.96   | 50.58 o  |
| -15 | 6 | 7 | 5631.78  | 6148.19  | 208.90 o |
| -14 | 6 | 7 | 604.27   | 604.70   | 35.18 o  |
| -13 | 6 | 7 | 1230.19  | 1328.15  | 68.17 o  |
| -12 | 6 | 7 | 256.93   | 321.04   | 28.59 o  |
| -11 | 6 | 7 | 9552.53  | 10726.30 | 446.38 o |
| -10 | 6 | 7 | 82.85    | 70.37    | 15.39 o  |
| -9  | 6 | 7 | 797.91   | 732.24   | 48.38 o  |
| -8  | 6 | 7 | 12.36    | 32.98    | 13.19 <  |
| -7  | 6 | 7 | 848.66   | 870.77   | 39.58 o  |
| -6  | 6 | 7 | 3962.24  | 4059.21  | 156.12 o |
| -5  | 6 | 7 | 172.19   | 107.75   | 21.99 o  |
| -4  | 6 | 7 | 56.21    | 65.97    | 19.79 o  |
| -3  | 6 | 7 | 4000.34  | 3995.44  | 138.53 o |
| -2  | 6 | 7 | 440.68   | 422.19   | 35.18 o  |
| -1  | 6 | 7 | 1343.35  | 1618.41  | 87.96 o  |
| 0   | 6 | 7 | 27.47    | 81.36    | 21.99 o  |
| 1   | 6 | 7 | 248.87   | 334.24   | 39.58 o  |
| 2   | 6 | 7 | 531.90   | 516.75   | 50.58 o  |
| 3   | 6 | 7 | 3992.37  | 4468.21  | 292.46 o |
| 4   | 6 | 7 | 194.28   | 204.50   | 50.58 o  |
| 5   | 6 | 7 | 408.25   | 325.44   | 35.18 o  |
| 6   | 6 | 7 | 0.76     | 15.39    | 10.99 <  |
| 7   | 6 | 7 | 1768.51  | 1882.28  | 70.37 o  |
| 8   | 6 | 7 | 383.63   | 376.02   | 26.39 o  |
| 9   | 6 | 7 | 6659.85  | 6928.81  | 266.07 o |
| 10  | 6 | 7 | 5.98     | 17.59    | 13.19 <  |
| 11  | 6 | 7 | 4886.60  | 4791.45  | 195.70 o |
| 12  | 6 | 7 | 581.40   | 510.15   | 30.78 o  |
| 13  | 6 | 7 | 2255.89  | 2473.79  | 105.55 o |
| 14  | 6 | 7 | 576.89   | 615.70   | 35.18 o  |
| 15  | 6 | 7 | 5.05     | 19.79    | 13.19 <  |
| 16  | 6 | 7 | 0.22     | -2.20    | 13.19 <  |
| 17  | 6 | 7 | 108.83   | 70.37    | 19.79 o  |
| -18 | 7 | 7 | 237.83   | 206.70   | 28.59 o  |
| -17 | 7 | 7 | 104.41   | 79.16    | 15.39 o  |
| -16 | 7 | 7 | 231.67   | 202.30   | 24.19 o  |
| -15 | 7 | 7 | 27.06    | 28.59    | 15.39 <  |
| -14 | 7 | 7 | 2942.64  | 2928.97  | 109.95 o |
| -13 | 7 | 7 | 607.04   | 617.90   | 43.98 o  |
| -12 | 7 | 7 | 1533.22  | 1587.62  | 98.95 o  |
| -11 | 7 | 7 | 606.25   | 646.48   | 37.38 o  |
| -10 | 7 | 7 | 3966.11  | 4479.21  | 153.93 o |
| -9  | 7 | 7 | 661.33   | 701.46   | 39.58 o  |
| -8  | 7 | 7 | 12583.10 | 13637.70 | 435.39 o |
| -7  | 7 | 7 | 20.41    | 54.97    | 15.39 o  |
| -6  | 7 | 7 | 913.30   | 828.99   | 52.77 o  |
| -5  | 7 | 7 | 64.57    | 74.76    | 281.46 < |
| -4  | 7 | 7 | 1114.23  | 989.52   | 43.98 o  |
| -3  | 7 | 7 | 0.44     | 6.60     | 10.99 <  |
| -2  | 7 | 7 | 8874.99  | 9431.18  | 303.45 o |
| -1  | 7 | 7 | 79.37    | 109.95   | 164.92 < |
| 0   | 7 | 7 | 18810.10 | 19625.40 | 888.36 o |
| 1   | 7 | 7 | 115.59   | 101.15   | 54.97 <  |

## regerite.cif

|     |   |   |          |          |          |
|-----|---|---|----------|----------|----------|
| 2   | 7 | 7 | 4744.22  | 4677.11  | 257.27 o |
| 3   | 7 | 7 | 38.41    | 50.58    | 30.78 <  |
| 4   | 7 | 7 | 3.33     | 6.60     | 17.59 <  |
| 5   | 7 | 7 | 140.93   | 112.14   | 15.39 o  |
| 6   | 7 | 7 | 11.93    | 28.59    | 57.17 <  |
| 7   | 7 | 7 | 35.21    | 28.59    | 68.17 <  |
| 8   | 7 | 7 | 3383.31  | 3720.58  | 127.54 o |
| 9   | 7 | 7 | 797.64   | 850.98   | 79.16 o  |
| 10  | 7 | 7 | 2034.47  | 2339.65  | 85.76 o  |
| 11  | 7 | 7 | 1658.71  | 1596.42  | 74.76 o  |
| 12  | 7 | 7 | 4520.35  | 4523.19  | 156.12 o |
| 13  | 7 | 7 | 225.39   | 202.30   | 21.99 o  |
| 14  | 7 | 7 | 83.48    | 57.17    | 17.59 o  |
| 15  | 7 | 7 | 256.38   | 248.48   | 24.19 o  |
| 16  | 7 | 7 | 777.62   | 635.49   | 37.38 o  |
| -18 | 8 | 7 | 900.14   | 279.26   | 35.18 o  |
| -17 | 8 | 7 | 8856.22  | 8562.61  | 338.63 o |
| -16 | 8 | 7 | 3.55     | -4.40    | 21.99 <  |
| -15 | 8 | 7 | 3472.15  | 3856.91  | 149.53 o |
| -14 | 8 | 7 | 858.22   | 767.42   | 46.18 o  |
| -13 | 8 | 7 | 1513.33  | 1651.39  | 68.17 o  |
| -12 | 8 | 7 | 251.15   | 274.86   | 26.39 o  |
| -11 | 8 | 7 | 10819.30 | 12861.50 | 419.99 o |
| -10 | 8 | 7 | 1985.79  | 2058.19  | 120.94 o |
| -9  | 8 | 7 | 24454.70 | 27704.20 | 879.57 o |
| -8  | 8 | 7 | 4965.40  | 5154.28  | 178.11 o |
| -7  | 8 | 7 | 2426.66  | 2348.45  | 107.75 o |
| -6  | 8 | 7 | 582.11   | 670.67   | 52.77 o  |
| -5  | 8 | 7 | 3581.89  | 3727.18  | 200.10 o |
| -4  | 8 | 7 | 147.09   | 149.53   | 83.56 <  |
| -3  | 8 | 7 | 174.45   | 169.32   | 15.39 o  |
| -2  | 8 | 7 | 3.42     | 8.80     | 8.80 <   |
| -1  | 8 | 7 | 3116.55  | 3133.47  | 107.75 o |
| 0   | 8 | 7 | 140.12   | 109.95   | 21.99 o  |
| 1   | 8 | 7 | 3560.60  | 3905.29  | 204.50 o |
| 2   | 8 | 7 | 0.60     | -28.59   | 37.38 <  |
| 3   | 8 | 7 | 1249.96  | 1314.96  | 52.77 o  |
| 4   | 8 | 7 | 36.64    | 28.59    | 39.58 <  |
| 5   | 8 | 7 | 21.44    | 65.97    | 15.39 o  |
| 6   | 8 | 7 | 132.77   | 156.12   | 19.79 o  |
| 7   | 8 | 7 | 7370.45  | 8059.06  | 296.86 o |
| 8   | 8 | 7 | 36.65    | 54.97    | 13.19 o  |
| 9   | 8 | 7 | 11.15    | 24.19    | 13.19 <  |
| 10  | 8 | 7 | 290.01   | 217.69   | 21.99 o  |
| 11  | 8 | 7 | 105.48   | 136.33   | 21.99 o  |
| 12  | 8 | 7 | 1387.19  | 1378.73  | 63.77 o  |
| 13  | 8 | 7 | 453.85   | 437.59   | 28.59 o  |
| 14  | 8 | 7 | 0.67     | 8.80     | 13.19 <  |
| 15  | 8 | 7 | 1671.66  | 1314.96  | 59.37 o  |
| 16  | 8 | 7 | 4.50     | 28.59    | 17.59 <  |
| -18 | 9 | 7 | 1522.03  | 461.77   | 68.17 o  |
| -17 | 9 | 7 | 4190.29  | 4298.90  | 204.50 o |
| -16 | 9 | 7 | 416.53   | 310.05   | 28.59 o  |
| -15 | 9 | 7 | 3132.58  | 3164.25  | 151.73 o |

## regerite.cif

|     |    |   |          |          |           |
|-----|----|---|----------|----------|-----------|
| -14 | 9  | 7 | 2166.20  | 2192.33  | 120.94 o  |
| -13 | 9  | 7 | 2020.06  | 2330.86  | 92.35 o   |
| -12 | 9  | 7 | 2126.66  | 2429.81  | 109.95 o  |
| -11 | 9  | 7 | 135.53   | 142.93   | 24.19 o   |
| -10 | 9  | 7 | 8536.05  | 9684.06  | 314.45 o  |
| -9  | 9  | 7 | 289.84   | 263.87   | 32.98 o   |
| -8  | 9  | 7 | 26981.50 | 28350.70 | 903.76 o  |
| -7  | 9  | 7 | 390.06   | 380.41   | 41.78 o   |
| -6  | 9  | 7 | 2730.93  | 3063.10  | 145.13 o  |
| -5  | 9  | 7 | 599.16   | 626.69   | 52.77 o   |
| -4  | 9  | 7 | 5879.74  | 6236.15  | 239.68 o  |
| -3  | 9  | 7 | 7.00     | -4.40    | 21.99 <   |
| -2  | 9  | 7 | 1671.62  | 1644.79  | 63.77 o   |
| -1  | 9  | 7 | 9.46     | 10.99    | 15.39 <   |
| 0   | 9  | 7 | 3029.97  | 3421.53  | 116.54 o  |
| 1   | 9  | 7 | 0.59     | 4.40     | 145.13 <  |
| 2   | 9  | 7 | 1727.69  | 1833.90  | 105.55 o  |
| 3   | 9  | 7 | 1804.77  | 1715.16  | 74.76 o   |
| 4   | 9  | 7 | 22.12    | 57.17    | 26.39 <   |
| 5   | 9  | 7 | 0.77     | -6.60    | 21.99 <   |
| 6   | 9  | 7 | 10717.50 | 10576.80 | 343.03 o  |
| 7   | 9  | 7 | 496.57   | 444.18   | 30.78 o   |
| 8   | 9  | 7 | 771.19   | 688.26   | 39.58 o   |
| 9   | 9  | 7 | 316.55   | 296.86   | 28.59 o   |
| 10  | 9  | 7 | 1777.14  | 1708.56  | 68.17 o   |
| 11  | 9  | 7 | 662.78   | 710.25   | 41.78 o   |
| 12  | 9  | 7 | 3139.69  | 3302.78  | 127.54 o  |
| 13  | 9  | 7 | 332.88   | 384.81   | 48.38 o   |
| 14  | 9  | 7 | 5.08     | 21.99    | 15.39 <   |
| 15  | 9  | 7 | 252.67   | 169.32   | 21.99 o   |
| 16  | 9  | 7 | 149.61   | 87.96    | 21.99 o   |
| -17 | 10 | 7 | 156.52   | 61.57    | 24.19 <   |
| -16 | 10 | 7 | 1031.10  | 897.16   | 48.38 o   |
| -15 | 10 | 7 | 961.59   | 921.35   | 48.38 o   |
| -14 | 10 | 7 | 3338.14  | 4419.84  | 158.32 o  |
| -13 | 10 | 7 | 7131.48  | 9569.72  | 316.64 o  |
| -12 | 10 | 7 | 1605.77  | 1836.10  | 74.76 o   |
| -11 | 10 | 7 | 7171.15  | 8868.26  | 472.77 o  |
| -10 | 10 | 7 | 1677.33  | 1842.70  | 74.76 o   |
| -9  | 10 | 7 | 5538.81  | 6069.03  | 204.50 o  |
| -8  | 10 | 7 | 735.85   | 677.27   | 50.58 o   |
| -7  | 10 | 7 | 8048.89  | 7909.53  | 290.26 o  |
| -6  | 10 | 7 | 16.86    | 6.60     | 15.39 <   |
| -5  | 10 | 7 | 10767.10 | 10682.40 | 400.20 o  |
| -4  | 10 | 7 | 388.74   | 351.83   | 28.59 o   |
| -3  | 10 | 7 | 31598.10 | 33122.40 | 1051.09 o |
| -2  | 10 | 7 | 463.06   | 419.99   | 26.39 o   |
| -1  | 10 | 7 | 9317.59  | 10280.00 | 336.43 o  |
| 0   | 10 | 7 | 14.57    | -4.40    | 92.35 <   |
| 1   | 10 | 7 | 20733.20 | 21916.70 | 701.46 o  |
| 2   | 10 | 7 | 2.58     | 26.39    | 13.19 <   |
| 3   | 10 | 7 | 7018.25  | 7916.13  | 261.67 o  |
| 4   | 10 | 7 | 19.23    | 43.98    | 21.99 <   |
| 5   | 10 | 7 | 266.43   | 257.27   | 28.59 o   |



## regerite.cif

|     |    |   |          |          |          |
|-----|----|---|----------|----------|----------|
| 6   | 10 | 7 | 1121.24  | 1187.42  | 74.76 o  |
| 7   | 10 | 7 | 2643.24  | 2568.34  | 94.55 o  |
| 8   | 10 | 7 | 1231.26  | 1110.46  | 48.38 o  |
| 9   | 10 | 7 | 3464.04  | 3637.02  | 127.54 o |
| 10  | 10 | 7 | 4.57     | 24.19    | 13.19 <  |
| 11  | 10 | 7 | 928.57   | 963.13   | 57.17 o  |
| 12  | 10 | 7 | 863.15   | 807.01   | 52.77 o  |
| 13  | 10 | 7 | 110.57   | 114.34   | 19.79 o  |
| 14  | 10 | 7 | 9.22     | 19.79    | 15.39 <  |
| 15  | 10 | 7 | 45.33    | 70.37    | 17.59 o  |
| -17 | 11 | 7 | 3.66     | 4.40     | 24.19 <  |
| -16 | 11 | 7 | 51.62    | 52.77    | 19.79 <  |
| -15 | 11 | 7 | 209.15   | 233.09   | 28.59 o  |
| -14 | 11 | 7 | 6731.96  | 8701.14  | 296.86 o |
| -13 | 11 | 7 | 1175.76  | 1519.46  | 68.17 o  |
| -12 | 11 | 7 | 2374.26  | 2539.76  | 112.14 o |
| -11 | 11 | 7 | 351.91   | 334.24   | 32.98 o  |
| -10 | 11 | 7 | 4.47     | 46.18    | 30.78 <  |
| -9  | 11 | 7 | 210.08   | 184.71   | 30.78 o  |
| -8  | 11 | 7 | 4186.49  | 4404.44  | 164.92 o |
| -7  | 11 | 7 | 704.14   | 716.85   | 43.98 o  |
| -6  | 11 | 7 | 255.73   | 228.69   | 30.78 o  |
| -5  | 11 | 7 | 5.23     | 8.80     | 17.59 <  |
| -4  | 11 | 7 | 737.10   | 850.98   | 46.18 o  |
| -3  | 11 | 7 | 26.15    | 43.98    | 26.39 <  |
| -2  | 11 | 7 | 27803.70 | 30802.50 | 978.52 o |
| -1  | 11 | 7 | 97.26    | 145.13   | 101.15 < |
| 0   | 11 | 7 | 6658.96  | 7027.76  | 241.88 o |
| 1   | 11 | 7 | 165.41   | 160.52   | 21.99 o  |
| 2   | 11 | 7 | 4268.09  | 4437.43  | 162.72 o |
| 3   | 11 | 7 | 192.51   | 149.53   | 169.32 < |
| 4   | 11 | 7 | 3.98     | -4.40    | 28.59 <  |
| 5   | 11 | 7 | 371.57   | 329.84   | 37.38 o  |
| 6   | 11 | 7 | 12617.70 | 13727.90 | 507.95 o |
| 7   | 11 | 7 | 1050.33  | 1040.09  | 46.18 o  |
| 8   | 11 | 7 | 3830.16  | 4105.39  | 145.13 o |
| 9   | 11 | 7 | 474.07   | 419.99   | 26.39 o  |
| 10  | 11 | 7 | 449.29   | 393.61   | 26.39 o  |
| 11  | 11 | 7 | 1282.52  | 1328.15  | 68.17 o  |
| 12  | 11 | 7 | 195.39   | 171.52   | 21.99 o  |
| 13  | 11 | 7 | 751.40   | 648.68   | 37.38 o  |
| 14  | 11 | 7 | 502.63   | 452.98   | 30.78 o  |
| 15  | 11 | 7 | 95.04    | 68.17    | 24.19 <  |
| -16 | 12 | 7 | 95.62    | 96.75    | 28.59 o  |
| -15 | 12 | 7 | 13.29    | 24.19    | 17.59 <  |
| -14 | 12 | 7 | 741.11   | 923.55   | 48.38 o  |
| -13 | 12 | 7 | 117.86   | 175.91   | 24.19 o  |
| -12 | 12 | 7 | 7.40     | -19.79   | 21.99 <  |
| -11 | 12 | 7 | 2145.63  | 2388.03  | 123.14 o |
| -10 | 12 | 7 | 4.75     | 37.38    | 39.58 <  |
| -9  | 12 | 7 | 3274.52  | 3696.39  | 131.93 o |
| -8  | 12 | 7 | 351.71   | 378.21   | 35.18 o  |
| -7  | 12 | 7 | 156.41   | 98.95    | 68.17 <  |
| -6  | 12 | 7 | 1038.47  | 1044.49  | 50.58 o  |

## regerite.cif

|     |    |   |          |          |        |   |
|-----|----|---|----------|----------|--------|---|
| -5  | 12 | 7 | 305.70   | 318.84   | 28.59  | o |
| -4  | 12 | 7 | 361.37   | 349.63   | 39.58  | o |
| -3  | 12 | 7 | 1.12     | 26.39    | 13.19  | < |
| -2  | 12 | 7 | 324.61   | 373.82   | 26.39  | o |
| -1  | 12 | 7 | 9714.02  | 11273.90 | 461.77 | o |
| 0   | 12 | 7 | 4.09     | -57.17   | 255.07 | < |
| 1   | 12 | 7 | 465.03   | 461.77   | 30.78  | o |
| 2   | 12 | 7 | 0.16     | -8.80    | 15.39  | < |
| 3   | 12 | 7 | 2869.16  | 2975.14  | 129.74 | o |
| 4   | 12 | 7 | 0.64     | -2.20    | 10.99  | < |
| 5   | 12 | 7 | 572.11   | 571.72   | 149.53 | o |
| 6   | 12 | 7 | 94.87    | 87.96    | 24.19  | o |
| 7   | 12 | 7 | 22803.50 | 24496.00 | 780.62 | o |
| 8   | 12 | 7 | 6.15     | 19.79    | 52.77  | < |
| 9   | 12 | 7 | 13927.40 | 15018.60 | 485.96 | o |
| 10  | 12 | 7 | 1.09     | 13.19    | 13.19  | < |
| 11  | 12 | 7 | 7141.38  | 8019.48  | 296.86 | o |
| 12  | 12 | 7 | 1.98     | 17.59    | 17.59  | < |
| 13  | 12 | 7 | 1851.75  | 1530.45  | 65.97  | o |
| 14  | 12 | 7 | 80.15    | 70.37    | 17.59  | o |
| -15 | 13 | 7 | 401.95   | 450.78   | 46.18  | o |
| -14 | 13 | 7 | 513.44   | 501.36   | 41.78  | o |
| -13 | 13 | 7 | 114.57   | 138.53   | 54.97  | < |
| -12 | 13 | 7 | 5.18     | 17.59    | 17.59  | < |
| -11 | 13 | 7 | 76.59    | 76.96    | 26.39  | < |
| -10 | 13 | 7 | 30.88    | 72.56    | 19.79  | o |
| -9  | 13 | 7 | 137.12   | 127.54   | 28.59  | o |
| -8  | 13 | 7 | 120.04   | 153.93   | 26.39  | o |
| -7  | 13 | 7 | 647.69   | 670.67   | 41.78  | o |
| -6  | 13 | 7 | 22086.30 | 24210.20 | 774.02 | o |
| -5  | 13 | 7 | 1.27     | -6.60    | 13.19  | < |
| -4  | 13 | 7 | 1559.36  | 1523.85  | 61.57  | o |
| -3  | 13 | 7 | 145.09   | 175.91   | 19.79  | o |
| -2  | 13 | 7 | 101.38   | 87.96    | 17.59  | o |
| -1  | 13 | 7 | 12.08    | 37.38    | 15.39  | < |
| 0   | 13 | 7 | 820.61   | 710.25   | 39.58  | o |
| 1   | 13 | 7 | 0.65     | -2.20    | 13.19  | < |
| 2   | 13 | 7 | 14555.00 | 15166.00 | 514.55 | o |
| 3   | 13 | 7 | 72.46    | 57.17    | 24.19  | < |
| 4   | 13 | 7 | 20354.10 | 22323.50 | 828.99 | o |
| 5   | 13 | 7 | 2.20     | 15.39    | 37.38  | < |
| 6   | 13 | 7 | 262.58   | 270.47   | 296.86 | < |
| 7   | 13 | 7 | 1429.40  | 1479.88  | 63.77  | o |
| 8   | 13 | 7 | 3996.43  | 4301.09  | 151.73 | o |
| 9   | 13 | 7 | 749.45   | 692.66   | 39.58  | o |
| 10  | 13 | 7 | 144.48   | 129.74   | 19.79  | o |
| 11  | 13 | 7 | 0.22     | 2.20     | 13.19  | < |
| 12  | 13 | 7 | 888.78   | 837.79   | 41.78  | o |
| 13  | 13 | 7 | 26.13    | 32.98    | 13.19  | < |
| -15 | 14 | 7 | 2613.92  | 2247.30  | 175.91 | o |
| -14 | 14 | 7 | 671.84   | 642.09   | 57.17  | o |
| -13 | 14 | 7 | 142.68   | 96.75    | 21.99  | o |
| -12 | 14 | 7 | 128.79   | 114.34   | 21.99  | o |
| -11 | 14 | 7 | 1262.22  | 1385.32  | 63.77  | o |

## regerite.cif

|     |    |   |          |          |          |
|-----|----|---|----------|----------|----------|
| -10 | 14 | 7 | 8.61     | -8.80    | 19.79 <  |
| -9  | 14 | 7 | 1819.41  | 2163.74  | 96.75 o  |
| -8  | 14 | 7 | 50.18    | 63.77    | 28.59 <  |
| -7  | 14 | 7 | 15115.40 | 15869.60 | 516.75 o |
| -6  | 14 | 7 | 430.29   | 369.42   | 26.39 o  |
| -5  | 14 | 7 | 3166.90  | 3129.07  | 114.34 o |
| -4  | 14 | 7 | 2.21     | 30.78    | 13.19 <  |
| -3  | 14 | 7 | 5518.64  | 5864.53  | 197.90 o |
| -2  | 14 | 7 | 1063.93  | 1202.81  | 52.77 o  |
| -1  | 14 | 7 | 9697.75  | 10689.00 | 349.63 o |
| 0   | 14 | 7 | 4.70     | -28.59   | 189.11 < |
| 1   | 14 | 7 | 7927.40  | 9145.32  | 305.65 o |
| 2   | 14 | 7 | 10.16    | 8.80     | 13.19 <  |
| 3   | 14 | 7 | 162.89   | 186.91   | 19.79 o  |
| 4   | 14 | 7 | 1571.44  | 1614.01  | 68.17 o  |
| 5   | 14 | 7 | 4802.23  | 4732.08  | 162.72 o |
| 6   | 14 | 7 | 136.34   | 118.74   | 26.39 o  |
| 7   | 14 | 7 | 1270.26  | 1455.69  | 63.77 o  |
| 8   | 14 | 7 | 29.62    | 17.59    | 17.59 <  |
| 9   | 14 | 7 | 2093.35  | 2203.32  | 123.14 o |
| 10  | 14 | 7 | 546.28   | 507.95   | 35.18 o  |
| 11  | 14 | 7 | 4531.33  | 4573.76  | 162.72 o |
| 12  | 14 | 7 | 381.39   | 292.46   | 24.19 o  |
| 13  | 14 | 7 | 516.49   | 8.80     | 85.76 <  |
| -14 | 15 | 7 | 4592.99  | 4155.97  | 235.29 o |
| -13 | 15 | 7 | 619.41   | 351.83   | 46.18 o  |
| -12 | 15 | 7 | 10849.60 | 11709.30 | 457.38 o |
| -11 | 15 | 7 | 1553.16  | 1420.50  | 65.97 o  |
| -10 | 15 | 7 | 3674.63  | 4063.61  | 147.33 o |
| -9  | 15 | 7 | 0.83     | 2.20     | 50.58 <  |
| -8  | 15 | 7 | 115.48   | 156.12   | 21.99 o  |
| -7  | 15 | 7 | 523.40   | 503.55   | 35.18 o  |
| -6  | 15 | 7 | 5363.96  | 5521.50  | 191.31 o |
| -5  | 15 | 7 | 26.39    | 19.79    | 15.39 <  |
| -4  | 15 | 7 | 189.73   | 178.11   | 19.79 o  |
| -3  | 15 | 7 | 820.31   | 769.62   | 41.78 o  |
| -2  | 15 | 7 | 3250.86  | 3395.14  | 123.14 o |
| -1  | 15 | 7 | 336.89   | 360.62   | 37.38 o  |
| 0   | 15 | 7 | 1357.56  | 1462.28  | 63.77 o  |
| 1   | 15 | 7 | 77.48    | 70.37    | 28.59 <  |
| 2   | 15 | 7 | 1040.68  | 1086.27  | 50.58 o  |
| 3   | 15 | 7 | 71.43    | 59.37    | 17.59 o  |
| 4   | 15 | 7 | 665.51   | 562.92   | 39.58 o  |
| 5   | 15 | 7 | 1447.61  | 1374.33  | 63.77 o  |
| 6   | 15 | 7 | 1158.10  | 1026.90  | 63.77 o  |
| 7   | 15 | 7 | 34.95    | 41.78    | 24.19 <  |
| 8   | 15 | 7 | 1770.95  | 1974.63  | 83.56 o  |
| 9   | 15 | 7 | 69.29    | 70.37    | 17.59 o  |
| 10  | 15 | 7 | 730.26   | 562.92   | 43.98 o  |
| 11  | 15 | 7 | 300.16   | 222.09   | 24.19 o  |
| 12  | 15 | 7 | 40.87    | -17.59   | 30.78 <  |
| -13 | 16 | 7 | 609.75   | 244.08   | 43.98 o  |
| -12 | 16 | 7 | 5480.63  | 4384.65  | 318.84 o |
| -11 | 16 | 7 | 1617.11  | 1356.74  | 79.16 o  |

## regerite.cif

|     |    |   |          |          |        |   |
|-----|----|---|----------|----------|--------|---|
| -10 | 16 | 7 | 1297.38  | 1286.37  | 59.37  | o |
| -9  | 16 | 7 | 6543.08  | 7157.50  | 244.08 | o |
| -8  | 16 | 7 | 76.72    | 52.77    | 15.39  | o |
| -7  | 16 | 7 | 3384.30  | 3949.27  | 164.92 | o |
| -6  | 16 | 7 | 3298.00  | 3637.02  | 131.93 | o |
| -5  | 16 | 7 | 1635.85  | 1902.07  | 81.36  | o |
| -4  | 16 | 7 | 42.86    | 59.37    | 17.59  | o |
| -3  | 16 | 7 | 2112.20  | 2198.92  | 85.76  | o |
| -2  | 16 | 7 | 598.75   | 712.45   | 41.78  | o |
| -1  | 16 | 7 | 12576.50 | 14913.10 | 721.25 | o |
| 0   | 16 | 7 | 174.16   | 175.91   | 103.35 | < |
| 1   | 16 | 7 | 4618.68  | 5310.40  | 184.71 | o |
| 2   | 16 | 7 | 80.44    | 107.75   | 19.79  | o |
| 3   | 16 | 7 | 102.84   | 103.35   | 17.59  | o |
| 4   | 16 | 7 | 48.82    | 24.19    | 30.78  | < |
| 5   | 16 | 7 | 2560.52  | 2497.98  | 98.95  | o |
| 6   | 16 | 7 | 162.16   | 153.93   | 19.79  | o |
| 7   | 16 | 7 | 459.43   | 345.23   | 37.38  | o |
| 8   | 16 | 7 | 330.23   | 296.86   | 35.18  | o |
| 9   | 16 | 7 | 684.26   | 613.50   | 50.58  | o |
| 10  | 16 | 7 | 282.02   | 197.90   | 24.19  | o |
| -12 | 17 | 7 | 144.74   | 63.77    | 24.19  | < |
| -11 | 17 | 7 | 211.13   | 151.73   | 41.78  | o |
| -10 | 17 | 7 | 3338.61  | 2643.11  | 151.73 | o |
| -9  | 17 | 7 | 276.76   | 252.88   | 24.19  | o |
| -8  | 17 | 7 | 1823.73  | 1719.56  | 72.56  | o |
| -7  | 17 | 7 | 627.12   | 591.51   | 35.18  | o |
| -6  | 17 | 7 | 20593.40 | 23908.90 | 822.40 | o |
| -5  | 17 | 7 | 355.38   | 310.05   | 26.39  | o |
| -4  | 17 | 7 | 6978.72  | 7359.80  | 312.25 | o |
| -3  | 17 | 7 | 176.36   | 160.52   | 26.39  | o |
| -2  | 17 | 7 | 1174.51  | 1086.27  | 52.77  | o |
| -1  | 17 | 7 | 183.74   | 211.10   | 24.19  | o |
| 0   | 17 | 7 | 855.70   | 780.62   | 43.98  | o |
| 1   | 17 | 7 | 136.30   | 147.33   | 19.79  | o |
| 2   | 17 | 7 | 6181.18  | 6495.62  | 217.69 | o |
| 3   | 17 | 7 | 26.67    | 74.76    | 17.59  | o |
| 4   | 17 | 7 | 5038.82  | 5363.17  | 186.91 | o |
| 5   | 17 | 7 | 72.15    | 74.76    | 28.59  | < |
| 6   | 17 | 7 | 343.46   | 268.27   | 32.98  | o |
| 7   | 17 | 7 | 445.32   | 371.62   | 35.18  | o |
| 8   | 17 | 7 | 1362.13  | 1103.86  | 57.17  | o |
| 9   | 17 | 7 | 0.87     | -13.19   | 17.59  | < |
| -11 | 18 | 7 | 853.91   | 468.37   | 65.97  | o |
| -10 | 18 | 7 | 51.71    | 59.37    | 32.98  | < |
| -9  | 18 | 7 | 322.35   | 149.53   | 32.98  | o |
| -8  | 18 | 7 | 55.96    | 30.78    | 17.59  | < |
| -7  | 18 | 7 | 1242.54  | 1332.55  | 63.77  | o |
| -6  | 18 | 7 | 201.79   | 186.91   | 37.38  | o |
| -5  | 18 | 7 | 3973.30  | 4578.16  | 178.11 | o |
| -4  | 18 | 7 | 0.08     | 2.20     | 15.39  | < |
| -3  | 18 | 7 | 432.28   | 446.38   | 30.78  | o |
| -2  | 18 | 7 | 268.21   | 345.23   | 57.17  | o |
| -1  | 18 | 7 | 4340.73  | 5004.75  | 189.11 | o |

## regerite.cif

|     |    |   |          |          |         |   |
|-----|----|---|----------|----------|---------|---|
| 0   | 18 | 7 | 351.93   | 393.61   | 35.18   | o |
| 1   | 18 | 7 | 295.17   | 338.63   | 41.78   | o |
| 2   | 18 | 7 | 467.88   | 376.02   | 35.18   | o |
| 3   | 18 | 7 | 826.96   | 888.36   | 48.38   | o |
| 4   | 18 | 7 | 35.94    | 43.98    | 17.59   | < |
| 5   | 18 | 7 | 1614.22  | 1576.63  | 72.56   | o |
| 6   | 18 | 7 | 693.58   | 584.91   | 46.18   | o |
| 7   | 18 | 7 | 1452.34  | 1306.16  | 76.96   | o |
| 8   | 18 | 7 | 112.84   | 127.54   | 50.58   | < |
| -9  | 19 | 7 | 286.13   | 175.91   | 70.37   | < |
| -8  | 19 | 7 | 2752.86  | 1603.02  | 156.12  | o |
| -7  | 19 | 7 | 187.04   | 127.54   | 24.19   | o |
| -6  | 19 | 7 | 52.35    | 52.77    | 19.79   | < |
| -5  | 19 | 7 | 81.27    | 46.18    | 17.59   | < |
| -4  | 19 | 7 | 5268.51  | 5989.87  | 224.29  | o |
| -3  | 19 | 7 | 5.15     | 8.80     | 15.39   | < |
| -2  | 19 | 7 | 2365.73  | 1990.03  | 83.56   | o |
| -1  | 19 | 7 | 139.22   | 160.52   | 19.79   | o |
| 0   | 19 | 7 | 3686.78  | 4043.82  | 160.52  | o |
| 1   | 19 | 7 | 72.56    | 52.77    | 123.14  | < |
| 2   | 19 | 7 | 2669.60  | 2328.66  | 105.55  | o |
| 3   | 19 | 7 | 716.10   | 589.31   | 37.38   | o |
| 4   | 19 | 7 | 3597.10  | 3384.14  | 145.13  | o |
| 5   | 19 | 7 | 214.95   | 138.53   | 24.19   | o |
| 6   | 19 | 7 | 11343.70 | 9224.48  | 505.75  | o |
| -7  | 20 | 7 | 91.13    | 28.59    | 26.39   | < |
| -6  | 20 | 7 | 328.01   | 303.45   | 65.97   | o |
| -5  | 20 | 7 | 1995.54  | 844.39   | 112.14  | o |
| -4  | 20 | 7 | 122.35   | 112.14   | 30.78   | o |
| -3  | 20 | 7 | 1792.73  | 1772.33  | 87.96   | o |
| -2  | 20 | 7 | 1.29     | -2.20    | 15.39   | < |
| -1  | 20 | 7 | 7.10     | 17.59    | 15.39   | < |
| 0   | 20 | 7 | 190.26   | 145.13   | 24.19   | o |
| 1   | 20 | 7 | 4920.34  | 4433.03  | 193.51  | o |
| 2   | 20 | 7 | 870.13   | 659.68   | 46.18   | o |
| 3   | 20 | 7 | 1518.60  | 1207.21  | 79.16   | o |
| 4   | 20 | 7 | 202.98   | 136.33   | 39.58   | o |
| -4  | 21 | 7 | 1412.28  | 549.73   | 94.55   | o |
| -3  | 21 | 7 | 94.10    | 26.39    | 26.39   | < |
| -2  | 21 | 7 | 519.00   | 266.07   | 37.38   | o |
| -1  | 21 | 7 | 34.94    | -2.20    | 127.54  | < |
| 0   | 21 | 7 | 9954.67  | 4791.45  | 367.22  | o |
| -18 | 0  | 8 | 2068.13  | 1444.69  | 90.16   | o |
| -17 | 0  | 8 | 12.31    | 26.39    | 15.39   | < |
| -16 | 0  | 8 | 80.10    | 156.12   | 35.18   | o |
| -15 | 0  | 8 | 1647.59  | 1501.86  | 90.16   | o |
| -14 | 0  | 8 | 126.62   | 87.96    | 21.99   | o |
| -13 | 0  | 8 | 348.38   | 274.86   | 35.18   | o |
| -12 | 0  | 8 | 0.43     | 63.77    | 24.19   | < |
| -11 | 0  | 8 | 2171.00  | 1959.24  | 107.75  | o |
| -10 | 0  | 8 | 30126.30 | 31160.90 | 1385.32 | o |
| -9  | 0  | 8 | 3.60     | 26.39    | 15.39   | < |
| -8  | 0  | 8 | 7468.77  | 7727.02  | 349.63  | o |
| -7  | 0  | 8 | 821.77   | 785.02   | 48.38   | o |

## regerite.cif

|     |   |   |          |          |         |   |
|-----|---|---|----------|----------|---------|---|
| -6  | 0 | 8 | 154.35   | 178.11   | 21.99   | o |
| -5  | 0 | 8 | 997.04   | 989.52   | 57.17   | o |
| -4  | 0 | 8 | 10238.60 | 10192.00 | 459.58  | o |
| -3  | 0 | 8 | 51.06    | 52.77    | 10.99   | o |
| -2  | 0 | 8 | 13516.90 | 13574.00 | 697.06  | o |
| 4   | 0 | 8 | 3234.35  | 2986.14  | 156.12  | o |
| 5   | 0 | 8 | 1356.85  | 1433.70  | 74.76   | o |
| 6   | 0 | 8 | 7838.27  | 8054.66  | 369.42  | o |
| 7   | 0 | 8 | 4.19     | 6.60     | 10.99   | < |
| 8   | 0 | 8 | 46187.90 | 53620.80 | 2775.04 | o |
| 9   | 0 | 8 | 169.99   | 169.32   | 28.59   | o |
| 10  | 0 | 8 | 15278.70 | 17017.50 | 897.16  | o |
| 11  | 0 | 8 | 173.64   | 204.50   | 32.98   | o |
| 12  | 0 | 8 | 2860.06  | 2662.90  | 162.72  | o |
| 13  | 0 | 8 | 5027.83  | 5567.67  | 303.45  | o |
| 14  | 0 | 8 | 9416.21  | 9897.36  | 543.13  | o |
| 15  | 0 | 8 | 719.22   | 505.75   | 57.17   | o |
| 16  | 0 | 8 | 1754.14  | 1099.46  | 96.75   | o |
| -18 | 1 | 8 | 113.44   | 90.16    | 15.39   | o |
| -17 | 1 | 8 | 88.67    | 105.55   | 17.59   | o |
| -16 | 1 | 8 | 1045.57  | 824.60   | 46.18   | o |
| -15 | 1 | 8 | 0.86     | 17.59    | 13.19   | < |
| -14 | 1 | 8 | 226.72   | 169.32   | 19.79   | o |
| -13 | 1 | 8 | 140.91   | 131.93   | 19.79   | o |
| -12 | 1 | 8 | 402.24   | 387.01   | 32.98   | o |
| -11 | 1 | 8 | 7929.48  | 8498.84  | 277.06  | o |
| -10 | 1 | 8 | 23.86    | 37.38    | 13.19   | < |
| -9  | 1 | 8 | 362.29   | 378.21   | 24.19   | o |
| -8  | 1 | 8 | 26.80    | 24.19    | 10.99   | < |
| -7  | 1 | 8 | 6126.24  | 6306.51  | 263.87  | o |
| -6  | 1 | 8 | 284.07   | 283.66   | 19.79   | o |
| -5  | 1 | 8 | 7037.23  | 6739.70  | 233.09  | o |
| -4  | 1 | 8 | 369.25   | 365.02   | 30.78   | o |
| -3  | 1 | 8 | 13552.40 | 14205.00 | 448.58  | o |
| -2  | 1 | 8 | 74.62    | 94.55    | 13.19   | o |
| -1  | 1 | 8 | 8170.97  | 9327.83  | 417.80  | o |
| 0   | 1 | 8 | 86.36    | 103.35   | 8.80    | o |
| 1   | 1 | 8 | 21483.00 | 26389.30 | 1169.83 | o |
| 2   | 1 | 8 | 91.04    | 87.96    | 10.99   | o |
| 3   | 1 | 8 | 6510.28  | 6154.79  | 327.64  | o |
| 4   | 1 | 8 | 4.55     | -8.80    | 46.18   | < |
| 5   | 1 | 8 | 2591.98  | 2704.68  | 101.15  | o |
| 6   | 1 | 8 | 0.80     | 4.40     | 8.80    | < |
| 7   | 1 | 8 | 133.55   | 127.54   | 15.39   | o |
| 8   | 1 | 8 | 2957.49  | 3184.04  | 180.31  | o |
| 9   | 1 | 8 | 3464.69  | 3740.37  | 164.92  | o |
| 10  | 1 | 8 | 806.32   | 824.60   | 46.18   | o |
| 11  | 1 | 8 | 58.29    | 46.18    | 13.19   | o |
| 12  | 1 | 8 | 782.64   | 809.20   | 48.38   | o |
| 13  | 1 | 8 | 5547.53  | 5846.94  | 250.68  | o |
| 14  | 1 | 8 | 3297.84  | 2999.33  | 134.13  | o |
| 15  | 1 | 8 | 57.38    | 41.78    | 15.39   | < |
| 16  | 1 | 8 | 0.11     | 2.20     | 17.59   | < |
| -18 | 2 | 8 | 3318.70  | 2610.12  | 101.15  | o |

## regerite.cif

|     |   |   |          |          |         |   |
|-----|---|---|----------|----------|---------|---|
| -17 | 2 | 8 | 1231.50  | 1117.05  | 52.77   | o |
| -16 | 2 | 8 | 5521.83  | 5536.89  | 217.69  | o |
| -15 | 2 | 8 | 337.10   | 340.83   | 26.39   | o |
| -14 | 2 | 8 | 2088.05  | 1952.64  | 90.16   | o |
| -13 | 2 | 8 | 861.88   | 752.03   | 46.18   | o |
| -12 | 2 | 8 | 9768.69  | 10414.10 | 382.61  | o |
| -11 | 2 | 8 | 1334.49  | 1314.96  | 54.97   | o |
| -10 | 2 | 8 | 7149.73  | 7381.79  | 279.26  | o |
| -9  | 2 | 8 | 353.00   | 365.02   | 24.19   | o |
| -8  | 2 | 8 | 6133.21  | 6840.85  | 281.46  | o |
| -7  | 2 | 8 | 573.20   | 536.54   | 30.78   | o |
| -6  | 2 | 8 | 15711.60 | 15858.60 | 538.74  | o |
| -5  | 2 | 8 | 2588.14  | 2607.92  | 101.15  | o |
| -4  | 2 | 8 | 2373.45  | 2176.93  | 94.55   | o |
| -3  | 2 | 8 | 62.85    | 61.57    | 13.19   | o |
| -2  | 2 | 8 | 8709.93  | 9980.91  | 448.58  | o |
| -1  | 2 | 8 | 42.41    | 41.78    | 10.99   | o |
| 0   | 2 | 8 | 2973.16  | 3300.58  | 149.53  | o |
| 1   | 2 | 8 | 1.84     | 6.60     | 32.98   | < |
| 2   | 2 | 8 | 32857.20 | 36640.70 | 1888.88 | o |
| 3   | 2 | 8 | 366.10   | 387.01   | 26.39   | o |
| 4   | 2 | 8 | 410.04   | 378.21   | 30.78   | o |
| 5   | 2 | 8 | 43.05    | 41.78    | 43.98   | < |
| 6   | 2 | 8 | 7892.32  | 8133.82  | 303.45  | o |
| 7   | 2 | 8 | 77.45    | 68.17    | 13.19   | o |
| 8   | 2 | 8 | 3605.90  | 3595.24  | 134.13  | o |
| 9   | 2 | 8 | 573.30   | 569.52   | 28.59   | o |
| 10  | 2 | 8 | 3208.44  | 3223.62  | 114.34  | o |
| 11  | 2 | 8 | 24.65    | 52.77    | 13.19   | o |
| 12  | 2 | 8 | 26.90    | 46.18    | 17.59   | < |
| 13  | 2 | 8 | 582.56   | 549.73   | 43.98   | o |
| 14  | 2 | 8 | 3986.06  | 3601.84  | 153.93  | o |
| 15  | 2 | 8 | 1204.54  | 923.55   | 50.58   | o |
| 16  | 2 | 8 | 32.21    | 2.20     | 13.19   | < |
| -18 | 3 | 8 | 634.17   | 516.75   | 158.32  | o |
| -17 | 3 | 8 | 4195.96  | 3753.56  | 138.53  | o |
| -16 | 3 | 8 | 1616.78  | 1708.56  | 103.35  | o |
| -15 | 3 | 8 | 1573.71  | 1488.67  | 63.77   | o |
| -14 | 3 | 8 | 475.76   | 459.58   | 28.59   | o |
| -13 | 3 | 8 | 3661.60  | 3667.80  | 151.73  | o |
| -12 | 3 | 8 | 2431.83  | 2563.95  | 134.13  | o |
| -11 | 3 | 8 | 630.06   | 560.73   | 35.18   | o |
| -10 | 3 | 8 | 1310.77  | 1273.18  | 61.57   | o |
| -9  | 3 | 8 | 445.89   | 384.81   | 35.18   | o |
| -8  | 3 | 8 | 292.99   | 290.26   | 116.54  | < |
| -7  | 3 | 8 | 7258.11  | 6920.01  | 244.08  | o |
| -6  | 3 | 8 | 675.99   | 655.28   | 94.55   | o |
| -5  | 3 | 8 | 2264.55  | 2370.44  | 85.76   | o |
| -4  | 3 | 8 | 497.72   | 479.36   | 24.19   | o |
| -3  | 3 | 8 | 342.99   | 294.66   | 26.39   | o |
| -2  | 3 | 8 | 7.32     | 2.20     | 13.19   | < |
| -1  | 3 | 8 | 728.35   | 807.01   | 46.18   | o |
| 0   | 3 | 8 | 730.01   | 787.22   | 43.98   | o |
| 1   | 3 | 8 | 9244.72  | 9129.93  | 409.00  | o |

## regerite.cif

|     |   |   |          |          |          |
|-----|---|---|----------|----------|----------|
| 2   | 3 | 8 | 70.64    | 46.18    | 26.39 <  |
| 3   | 3 | 8 | 3737.83  | 4087.80  | 241.88 o |
| 4   | 3 | 8 | 436.73   | 450.78   | 178.11 < |
| 5   | 3 | 8 | 72.65    | 81.36    | 50.58 <  |
| 6   | 3 | 8 | 956.85   | 989.52   | 39.58 o  |
| 7   | 3 | 8 | 2831.59  | 3113.68  | 114.34 o |
| 8   | 3 | 8 | 512.02   | 406.80   | 24.19 o  |
| 9   | 3 | 8 | 999.77   | 965.33   | 43.98 o  |
| 10  | 3 | 8 | 1157.36  | 1174.23  | 50.58 o  |
| 11  | 3 | 8 | 79.04    | 72.56    | 15.39 o  |
| 12  | 3 | 8 | 218.88   | 193.51   | 19.79 o  |
| 13  | 3 | 8 | 2.46     | 21.99    | 15.39 <  |
| 14  | 3 | 8 | 3512.23  | 3082.89  | 151.73 o |
| 15  | 3 | 8 | 5222.55  | 4736.48  | 184.71 o |
| 16  | 3 | 8 | 158.07   | 116.54   | 21.99 o  |
| -18 | 4 | 8 | 5600.06  | 5011.35  | 211.10 o |
| -17 | 4 | 8 | 1646.69  | 1303.96  | 59.37 o  |
| -16 | 4 | 8 | 168.51   | 125.34   | 19.79 o  |
| -15 | 4 | 8 | 187.09   | 127.54   | 19.79 o  |
| -14 | 4 | 8 | 1144.89  | 1020.30  | 48.38 o  |
| -13 | 4 | 8 | 1171.93  | 1108.26  | 61.57 o  |
| -12 | 4 | 8 | 2429.81  | 2539.76  | 107.75 o |
| -11 | 4 | 8 | 10.11    | 24.19    | 15.39 <  |
| -10 | 4 | 8 | 8739.72  | 9512.54  | 329.84 o |
| -9  | 4 | 8 | 249.77   | 219.89   | 21.99 o  |
| -8  | 4 | 8 | 132.84   | 142.93   | 24.19 o  |
| -7  | 4 | 8 | 795.67   | 719.05   | 46.18 o  |
| -6  | 4 | 8 | 2196.18  | 1976.83  | 79.16 o  |
| -5  | 4 | 8 | 20.08    | -4.40    | 28.59 <  |
| -4  | 4 | 8 | 14904.90 | 15249.50 | 565.12 o |
| -3  | 4 | 8 | 254.08   | 213.30   | 28.59 o  |
| -2  | 4 | 8 | 3944.62  | 4553.97  | 305.65 o |
| -1  | 4 | 8 | 44.47    | 54.97    | 15.39 o  |
| 0   | 4 | 8 | 19582.40 | 21512.10 | 960.93 o |
| 1   | 4 | 8 | 115.00   | 120.94   | 17.59 o  |
| 2   | 4 | 8 | 2000.60  | 2077.98  | 580.52 o |
| 3   | 4 | 8 | 62.30    | 52.77    | 41.78 <  |
| 4   | 4 | 8 | 11483.90 | 12573.40 | 573.92 o |
| 5   | 4 | 8 | 4.69     | 6.60     | 26.39 <  |
| 6   | 4 | 8 | 6551.89  | 6871.64  | 281.46 o |
| 7   | 4 | 8 | 862.42   | 839.99   | 35.18 o  |
| 8   | 4 | 8 | 2474.36  | 2568.34  | 92.35 o  |
| 9   | 4 | 8 | 901.77   | 837.79   | 39.58 o  |
| 10  | 4 | 8 | 232.53   | 197.90   | 19.79 o  |
| 11  | 4 | 8 | 12.94    | 8.80     | 13.19 <  |
| 12  | 4 | 8 | 16.69    | 46.18    | 15.39 <  |
| 13  | 4 | 8 | 133.16   | 142.93   | 19.79 o  |
| 14  | 4 | 8 | 6263.94  | 6115.21  | 266.07 o |
| 15  | 4 | 8 | 1527.14  | 1161.03  | 74.76 o  |
| 16  | 4 | 8 | 1186.02  | 912.55   | 52.77 o  |
| -18 | 5 | 8 | 2315.52  | 1902.07  | 101.15 o |
| -17 | 5 | 8 | 353.46   | 283.66   | 24.19 o  |
| -16 | 5 | 8 | 971.22   | 809.20   | 48.38 o  |
| -15 | 5 | 8 | 2464.37  | 2368.24  | 92.35 o  |



## regerite.cif

|     |   |   |          |          |        |   |
|-----|---|---|----------|----------|--------|---|
| -14 | 5 | 8 | 86.56    | 105.55   | 15.39  | o |
| -13 | 5 | 8 | 5469.91  | 5479.72  | 217.69 | o |
| -12 | 5 | 8 | 3087.72  | 3533.67  | 158.32 | o |
| -11 | 5 | 8 | 6.20     | 43.98    | 19.79  | < |
| -10 | 5 | 8 | 105.35   | 112.14   | 17.59  | o |
| -9  | 5 | 8 | 4036.82  | 4274.71  | 147.33 | o |
| -8  | 5 | 8 | 270.68   | 263.87   | 26.39  | o |
| -7  | 5 | 8 | 1166.09  | 1229.20  | 54.97  | o |
| -6  | 5 | 8 | 0.72     | 19.79    | 28.59  | < |
| -5  | 5 | 8 | 7415.09  | 7847.96  | 279.26 | o |
| -4  | 5 | 8 | 117.74   | 98.95    | 70.37  | < |
| -3  | 5 | 8 | 1295.43  | 1427.10  | 76.96  | o |
| -2  | 5 | 8 | 331.85   | 329.84   | 30.78  | o |
| -1  | 5 | 8 | 2782.37  | 3049.91  | 147.33 | o |
| 0   | 5 | 8 | 714.41   | 688.26   | 46.18  | o |
| 1   | 5 | 8 | 6808.86  | 7100.32  | 332.04 | o |
| 2   | 5 | 8 | 660.37   | 604.70   | 41.78  | o |
| 3   | 5 | 8 | 2300.54  | 2346.25  | 142.93 | o |
| 4   | 5 | 8 | 31.06    | 21.99    | 15.39  | < |
| 5   | 5 | 8 | 914.90   | 809.20   | 90.16  | o |
| 6   | 5 | 8 | 693.64   | 749.83   | 81.36  | o |
| 7   | 5 | 8 | 5700.76  | 6108.61  | 200.10 | o |
| 8   | 5 | 8 | 527.05   | 463.97   | 87.96  | o |
| 9   | 5 | 8 | 11060.90 | 12476.70 | 404.60 | o |
| 10  | 5 | 8 | 1151.05  | 1110.46  | 48.38  | o |
| 11  | 5 | 8 | 703.79   | 725.65   | 37.38  | o |
| 12  | 5 | 8 | 2638.61  | 2902.58  | 107.75 | o |
| 13  | 5 | 8 | 3123.86  | 3300.58  | 120.94 | o |
| 14  | 5 | 8 | 156.93   | 101.15   | 21.99  | o |
| 15  | 5 | 8 | 418.57   | 367.22   | 28.59  | o |
| 16  | 5 | 8 | 1193.81  | 850.98   | 65.97  | o |
| -18 | 6 | 8 | 1006.84  | 558.53   | 48.38  | o |
| -17 | 6 | 8 | 295.99   | 241.88   | 24.19  | o |
| -16 | 6 | 8 | 846.32   | 745.43   | 46.18  | o |
| -15 | 6 | 8 | 248.99   | 184.71   | 26.39  | o |
| -14 | 6 | 8 | 1061.87  | 1031.30  | 54.97  | o |
| -13 | 6 | 8 | 1084.51  | 1033.49  | 54.97  | o |
| -12 | 6 | 8 | 15391.90 | 16681.00 | 624.49 | o |
| -11 | 6 | 8 | 419.66   | 380.41   | 28.59  | o |
| -10 | 6 | 8 | 1024.51  | 1059.88  | 61.57  | o |
| -9  | 6 | 8 | 315.53   | 299.05   | 24.19  | o |
| -8  | 6 | 8 | 1245.05  | 1262.18  | 59.37  | o |
| -7  | 6 | 8 | 397.47   | 404.60   | 380.41 | < |
| -6  | 6 | 8 | 141.43   | 184.71   | 134.13 | < |
| -5  | 6 | 8 | 6.73     | 24.19    | 19.79  | < |
| -4  | 6 | 8 | 8076.92  | 8278.95  | 268.27 | o |
| -3  | 6 | 8 | 103.33   | 92.35    | 17.59  | o |
| -2  | 6 | 8 | 1764.17  | 1741.55  | 103.35 | o |
| -1  | 6 | 8 | 109.66   | 136.33   | 30.78  | o |
| 0   | 6 | 8 | 87.27    | 90.16    | 26.39  | o |
| 1   | 6 | 8 | 115.49   | 118.74   | 26.39  | o |
| 2   | 6 | 8 | 9207.61  | 9989.71  | 639.89 | o |
| 3   | 6 | 8 | 106.89   | 140.73   | 39.58  | o |
| 4   | 6 | 8 | 407.57   | 334.24   | 46.18  | o |

## regerite.cif

|     |   |   |          |          |          |
|-----|---|---|----------|----------|----------|
| 5   | 6 | 8 | 1623.43  | 1712.96  | 96.75 o  |
| 6   | 6 | 8 | 2132.30  | 2280.28  | 140.73 o |
| 7   | 6 | 8 | 2029.44  | 2157.14  | 76.96 o  |
| 8   | 6 | 8 | 1831.06  | 1807.52  | 65.97 o  |
| 9   | 6 | 8 | 372.54   | 417.80   | 26.39 o  |
| 10  | 6 | 8 | 11143.60 | 12305.20 | 400.20 o |
| 11  | 6 | 8 | 4.50     | 17.59    | 13.19 <  |
| 12  | 6 | 8 | 8407.84  | 8624.18  | 288.06 o |
| 13  | 6 | 8 | 90.06    | 79.16    | 19.79 o  |
| 14  | 6 | 8 | 56.59    | 46.18    | 17.59 <  |
| 15  | 6 | 8 | 2276.55  | 1677.78  | 81.36 o  |
| -17 | 7 | 8 | 948.29   | 754.23   | 46.18 o  |
| -16 | 7 | 8 | 12.51    | -4.40    | 15.39 <  |
| -15 | 7 | 8 | 4344.18  | 4296.70  | 162.72 o |
| -14 | 7 | 8 | 347.61   | 318.84   | 30.78 o  |
| -13 | 7 | 8 | 403.22   | 365.02   | 28.59 o  |
| -12 | 7 | 8 | 2415.89  | 2497.98  | 134.13 o |
| -11 | 7 | 8 | 11489.20 | 12771.30 | 417.80 o |
| -10 | 7 | 8 | 2009.92  | 1963.64  | 92.35 o  |
| -9  | 7 | 8 | 330.66   | 356.23   | 26.39 o  |
| -8  | 7 | 8 | 57.29    | 85.76    | 15.39 o  |
| -7  | 7 | 8 | 14192.10 | 15179.20 | 483.76 o |
| -6  | 7 | 8 | 280.25   | 327.64   | 30.78 o  |
| -5  | 7 | 8 | 7969.55  | 8426.28  | 303.45 o |
| -4  | 7 | 8 | 630.93   | 635.49   | 30.78 o  |
| -3  | 7 | 8 | 8599.30  | 9763.22  | 448.58 o |
| -2  | 7 | 8 | 154.34   | 149.53   | 24.19 o  |
| -1  | 7 | 8 | 3663.18  | 3661.21  | 182.51 o |
| 0   | 7 | 8 | 1001.00  | 1139.04  | 70.37 o  |
| 1   | 7 | 8 | 19048.10 | 21195.40 | 954.33 o |
| 2   | 7 | 8 | 1.04     | -10.99   | 19.79 <  |
| 3   | 7 | 8 | 12518.00 | 13514.60 | 609.10 o |
| 4   | 7 | 8 | 18.34    | -41.78   | 48.38 <  |
| 5   | 7 | 8 | 11688.20 | 12597.60 | 571.72 o |
| 6   | 7 | 8 | 81.26    | 39.58    | 28.59 <  |
| 7   | 7 | 8 | 12798.60 | 14464.50 | 463.97 o |
| 8   | 7 | 8 | 291.51   | 299.05   | 19.79 o  |
| 9   | 7 | 8 | 2103.21  | 2152.75  | 92.35 o  |
| 10  | 7 | 8 | 3554.96  | 3830.52  | 153.93 o |
| 11  | 7 | 8 | 2734.22  | 2887.19  | 107.75 o |
| 12  | 7 | 8 | 1255.40  | 1229.20  | 59.37 o  |
| 13  | 7 | 8 | 2925.57  | 2790.43  | 120.94 o |
| 14  | 7 | 8 | 974.92   | 745.43   | 46.18 o  |
| 15  | 7 | 8 | 6638.49  | 5967.88  | 237.48 o |
| -17 | 8 | 8 | 642.60   | 290.26   | 28.59 o  |
| -16 | 8 | 8 | 8.32     | -6.60    | 21.99 <  |
| -15 | 8 | 8 | 7.58     | 6.60     | 17.59 <  |
| -14 | 8 | 8 | 827.59   | 857.58   | 59.37 o  |
| -13 | 8 | 8 | 561.71   | 602.51   | 39.58 o  |
| -12 | 8 | 8 | 3027.08  | 3239.01  | 125.34 o |
| -11 | 8 | 8 | 2981.19  | 3368.75  | 123.14 o |
| -10 | 8 | 8 | 1172.17  | 1242.39  | 54.97 o  |
| -9  | 8 | 8 | 115.55   | 83.56    | 30.78 <  |
| -8  | 8 | 8 | 483.71   | 470.57   | 50.58 o  |

## regerite.cif

|     |   |   |          |          |           |
|-----|---|---|----------|----------|-----------|
| -7  | 8 | 8 | 47.23    | 41.78    | 26.39 <   |
| -6  | 8 | 8 | 2349.83  | 2687.08  | 116.54 o  |
| -5  | 8 | 8 | 996.96   | 1035.69  | 46.18 o   |
| -4  | 8 | 8 | 355.89   | 426.59   | 24.19 o   |
| -3  | 8 | 8 | 497.86   | 558.53   | 32.98 o   |
| -2  | 8 | 8 | 257.68   | 268.27   | 30.78 o   |
| -1  | 8 | 8 | 439.09   | 481.56   | 41.78 o   |
| 0   | 8 | 8 | 2719.85  | 3298.39  | 167.12 o  |
| 1   | 8 | 8 | 26.17    | 30.78    | 46.18 <   |
| 2   | 8 | 8 | 93.93    | 98.95    | 24.19 o   |
| 3   | 8 | 8 | 191.15   | 294.66   | 50.58 o   |
| 4   | 8 | 8 | 928.66   | 934.54   | 70.37 o   |
| 5   | 8 | 8 | 145.85   | 151.73   | 35.18 o   |
| 6   | 8 | 8 | 3469.27  | 3889.90  | 149.53 o  |
| 7   | 8 | 8 | 84.69    | 76.96    | 15.39 o   |
| 8   | 8 | 8 | 3207.36  | 3329.17  | 158.32 o  |
| 9   | 8 | 8 | 862.19   | 837.79   | 46.18 o   |
| 10  | 8 | 8 | 1996.68  | 2137.35  | 85.76 o   |
| 11  | 8 | 8 | 42.91    | 26.39    | 13.19 <   |
| 12  | 8 | 8 | 2439.40  | 2471.59  | 94.55 o   |
| 13  | 8 | 8 | 31.58    | 19.79    | 17.59 <   |
| 14  | 8 | 8 | 192.91   | 134.13   | 21.99 o   |
| 15  | 8 | 8 | 1433.44  | 1147.84  | 79.16 o   |
| -17 | 9 | 8 | 143.66   | 61.57    | 26.39 <   |
| -16 | 9 | 8 | 135.32   | 83.56    | 19.79 o   |
| -15 | 9 | 8 | 2806.56  | 3296.19  | 173.71 o  |
| -14 | 9 | 8 | 1276.75  | 1147.84  | 59.37 o   |
| -13 | 9 | 8 | 8810.37  | 9503.75  | 510.15 o  |
| -12 | 9 | 8 | 178.38   | 153.93   | 26.39 o   |
| -11 | 9 | 8 | 335.08   | 288.06   | 30.78 o   |
| -10 | 9 | 8 | 129.84   | 118.74   | 50.58 <   |
| -9  | 9 | 8 | 1413.64  | 1468.88  | 65.97 o   |
| -8  | 9 | 8 | 37.59    | 50.58    | 30.78 <   |
| -7  | 9 | 8 | 4687.15  | 5321.40  | 206.70 o  |
| -6  | 9 | 8 | 235.05   | 288.06   | 32.98 o   |
| -5  | 9 | 8 | 64889.90 | 70260.00 | 2205.52 o |
| -4  | 9 | 8 | 2.02     | 6.60     | 10.99 <   |
| -3  | 9 | 8 | 5968.43  | 6590.17  | 215.49 o  |
| -2  | 9 | 8 | 188.11   | 248.48   | 30.78 o   |
| -1  | 9 | 8 | 60.33    | 72.56    | 19.79 o   |
| 0   | 9 | 8 | 8.46     | 43.98    | 24.19 <   |
| 1   | 9 | 8 | 212.15   | 294.66   | 35.18 o   |
| 2   | 9 | 8 | 5.24     | -4.40    | 21.99 <   |
| 3   | 9 | 8 | 13588.40 | 14803.20 | 771.82 o  |
| 4   | 9 | 8 | 643.43   | 595.91   | 61.57 o   |
| 5   | 9 | 8 | 15118.30 | 17749.70 | 815.80 o  |
| 6   | 9 | 8 | 236.48   | 228.69   | 17.59 o   |
| 7   | 9 | 8 | 146.04   | 158.32   | 19.79 o   |
| 8   | 9 | 8 | 496.89   | 452.98   | 30.78 o   |
| 9   | 9 | 8 | 5520.12  | 6091.02  | 239.68 o  |
| 10  | 9 | 8 | 467.53   | 430.99   | 26.39 o   |
| 11  | 9 | 8 | 767.64   | 730.04   | 37.38 o   |
| 12  | 9 | 8 | 35.18    | 37.38    | 17.59 <   |
| 13  | 9 | 8 | 4382.10  | 4360.47  | 178.11 o  |

## regerite.cif

|     |    |   |          |          |          |
|-----|----|---|----------|----------|----------|
| 14  | 9  | 8 | 369.52   | 283.66   | 32.98 o  |
| -16 | 10 | 8 | 885.40   | 424.39   | 39.58 o  |
| -15 | 10 | 8 | 406.10   | 314.45   | 26.39 o  |
| -14 | 10 | 8 | 566.62   | 345.23   | 28.59 o  |
| -13 | 10 | 8 | 357.27   | 343.03   | 30.78 o  |
| -12 | 10 | 8 | 114.54   | 149.53   | 21.99 o  |
| -11 | 10 | 8 | 2.26     | -6.60    | 15.39 <  |
| -10 | 10 | 8 | 3474.47  | 3615.03  | 131.93 o |
| -9  | 10 | 8 | 61.49    | 61.57    | 26.39 <  |
| -8  | 10 | 8 | 3670.90  | 3931.68  | 142.93 o |
| -7  | 10 | 8 | 249.77   | 195.70   | 35.18 o  |
| -6  | 10 | 8 | 2831.75  | 2970.75  | 116.54 o |
| -5  | 10 | 8 | 9.28     | 13.19    | 15.39 <  |
| -4  | 10 | 8 | 2200.19  | 2236.31  | 81.36 o  |
| -3  | 10 | 8 | 924.67   | 923.55   | 41.78 o  |
| -2  | 10 | 8 | 1357.79  | 1286.37  | 50.58 o  |
| -1  | 10 | 8 | 119.36   | 131.93   | 162.72 < |
| 0   | 10 | 8 | 6285.23  | 7062.94  | 296.86 o |
| 1   | 10 | 8 | 3.75     | -13.19   | 28.59 <  |
| 2   | 10 | 8 | 1089.75  | 1270.98  | 79.16 o  |
| 3   | 10 | 8 | 1578.91  | 1886.68  | 96.75 o  |
| 4   | 10 | 8 | 4640.46  | 5499.51  | 263.87 o |
| 5   | 10 | 8 | 1081.70  | 1066.48  | 59.37 o  |
| 6   | 10 | 8 | 1798.36  | 1875.68  | 74.76 o  |
| 7   | 10 | 8 | 950.58   | 938.94   | 43.98 o  |
| 8   | 10 | 8 | 3547.26  | 3465.50  | 123.14 o |
| 9   | 10 | 8 | 188.71   | 178.11   | 24.19 o  |
| 10  | 10 | 8 | 42.32    | 30.78    | 13.19 <  |
| 11  | 10 | 8 | 22.15    | 17.59    | 13.19 <  |
| 12  | 10 | 8 | 908.85   | 758.63   | 43.98 o  |
| 13  | 10 | 8 | 283.27   | 239.68   | 24.19 o  |
| 14  | 10 | 8 | 2712.24  | 2392.43  | 138.53 o |
| -16 | 11 | 8 | 214.36   | 101.15   | 26.39 o  |
| -15 | 11 | 8 | 1684.19  | 1286.37  | 83.56 o  |
| -14 | 11 | 8 | 237.69   | 197.90   | 24.19 o  |
| -13 | 11 | 8 | 2420.86  | 2625.51  | 103.35 o |
| -12 | 11 | 8 | 50.23    | 28.59    | 37.38 <  |
| -11 | 11 | 8 | 11946.80 | 13237.50 | 606.90 o |
| -10 | 11 | 8 | 822.49   | 835.59   | 52.77 o  |
| -9  | 11 | 8 | 1436.05  | 1521.66  | 68.17 o  |
| -8  | 11 | 8 | 11.65    | 19.79    | 26.39 <  |
| -7  | 11 | 8 | 1104.07  | 1147.84  | 98.95 o  |
| -6  | 11 | 8 | 68.14    | 70.37    | 19.79 o  |
| -5  | 11 | 8 | 130.34   | 118.74   | 19.79 o  |
| -4  | 11 | 8 | 0.20     | 4.40     | 10.99 <  |
| -3  | 11 | 8 | 11883.10 | 13266.10 | 428.79 o |
| -2  | 11 | 8 | 25.57    | 21.99    | 24.19 <  |
| -1  | 11 | 8 | 5674.68  | 5805.16  | 222.09 o |
| 0   | 11 | 8 | 2.34     | -4.40    | 329.84 < |
| 1   | 11 | 8 | 57.52    | 76.96    | 15.39 o  |
| 2   | 11 | 8 | 49.02    | 41.78    | 17.59 <  |
| 3   | 11 | 8 | 3008.45  | 3195.04  | 112.14 o |
| 4   | 11 | 8 | 3.16     | 13.19    | 24.19 <  |
| 5   | 11 | 8 | 289.64   | 343.03   | 21.99 o  |

## regerite.cif

|     |    |   |          |          |          |
|-----|----|---|----------|----------|----------|
| 6   | 11 | 8 | 27.87    | 41.78    | 109.95 < |
| 7   | 11 | 8 | 7398.91  | 7863.35  | 274.86 o |
| 8   | 11 | 8 | 535.09   | 516.75   | 39.58 o  |
| 9   | 11 | 8 | 222.85   | 235.29   | 24.19 o  |
| 10  | 11 | 8 | 585.89   | 507.95   | 30.78 o  |
| 11  | 11 | 8 | 523.47   | 512.35   | 30.78 o  |
| 12  | 11 | 8 | 794.54   | 584.91   | 37.38 o  |
| 13  | 11 | 8 | 268.98   | 195.70   | 26.39 o  |
| -15 | 12 | 8 | 79.09    | 68.17    | 24.19 <  |
| -14 | 12 | 8 | 57.22    | 48.38    | 17.59 <  |
| -13 | 12 | 8 | 608.17   | 582.72   | 41.78 o  |
| -12 | 12 | 8 | 497.10   | 483.76   | 39.58 o  |
| -11 | 12 | 8 | 2888.09  | 2909.18  | 235.29 o |
| -10 | 12 | 8 | 132.83   | 116.54   | 21.99 o  |
| -9  | 12 | 8 | 582.99   | 578.32   | 41.78 o  |
| -8  | 12 | 8 | 119.49   | 164.92   | 35.18 o  |
| -7  | 12 | 8 | 23.17    | 17.59    | 24.19 <  |
| -6  | 12 | 8 | 13350.50 | 14088.50 | 457.38 o |
| -5  | 12 | 8 | 1289.00  | 1341.34  | 63.77 o  |
| -4  | 12 | 8 | 1089.72  | 1194.02  | 50.58 o  |
| -3  | 12 | 8 | 337.19   | 415.60   | 41.78 o  |
| -2  | 12 | 8 | 4488.94  | 4472.61  | 178.11 o |
| -1  | 12 | 8 | 257.20   | 303.45   | 92.35 o  |
| 0   | 12 | 8 | 10241.20 | 10992.40 | 501.36 o |
| 1   | 12 | 8 | 232.13   | 211.10   | 250.68 < |
| 2   | 12 | 8 | 360.30   | 380.41   | 24.19 o  |
| 3   | 12 | 8 | 220.37   | 233.09   | 17.59 o  |
| 4   | 12 | 8 | 3140.28  | 3162.05  | 123.14 o |
| 5   | 12 | 8 | 9.64     | 10.99    | 24.19 <  |
| 6   | 12 | 8 | 237.61   | 189.11   | 46.18 o  |
| 7   | 12 | 8 | 359.27   | 316.64   | 30.78 o  |
| 8   | 12 | 8 | 2291.68  | 2429.81  | 142.93 o |
| 9   | 12 | 8 | 1371.54  | 1235.80  | 488.16 < |
| 10  | 12 | 8 | 103.78   | 112.14   | 17.59 o  |
| 11  | 12 | 8 | 156.34   | 92.35    | 15.39 o  |
| 12  | 12 | 8 | 6.59     | 6.60     | 17.59 <  |
| 13  | 12 | 8 | 0.09     | 10.99    | 15.39 <  |
| -14 | 13 | 8 | 174.29   | 173.71   | 48.38 o  |
| -13 | 13 | 8 | 65.51    | 85.76    | 28.59 o  |
| -12 | 13 | 8 | 242.51   | 235.29   | 30.78 o  |
| -11 | 13 | 8 | 1251.57  | 1257.78  | 61.57 o  |
| -10 | 13 | 8 | 60.75    | 94.55    | 52.77 <  |
| -9  | 13 | 8 | 3608.03  | 3863.51  | 193.51 o |
| -8  | 13 | 8 | 139.72   | 147.33   | 32.98 o  |
| -7  | 13 | 8 | 875.08   | 846.59   | 43.98 o  |
| -6  | 13 | 8 | 2304.62  | 2502.38  | 96.75 o  |
| -5  | 13 | 8 | 5048.74  | 5167.47  | 178.11 o |
| -4  | 13 | 8 | 6.12     | 15.39    | 15.39 <  |
| -3  | 13 | 8 | 65.32    | 85.76    | 15.39 o  |
| -2  | 13 | 8 | 435.17   | 419.99   | 32.98 o  |
| -1  | 13 | 8 | 1012.96  | 1086.27  | 52.77 o  |
| 0   | 13 | 8 | 10.36    | 24.19    | 26.39 <  |
| 1   | 13 | 8 | 402.83   | 404.60   | 26.39 o  |
| 2   | 13 | 8 | 35.58    | 57.17    | 76.96 <  |

## regerite.cif

|     |    |   |          |         |          |
|-----|----|---|----------|---------|----------|
| 3   | 13 | 8 | 7001.65  | 7285.03 | 241.88 o |
| 4   | 13 | 8 | 248.90   | 268.27  | 30.78 o  |
| 5   | 13 | 8 | 5481.52  | 5246.63 | 222.09 o |
| 6   | 13 | 8 | 672.91   | 697.06  | 112.14 o |
| 7   | 13 | 8 | 3932.45  | 3975.65 | 145.13 o |
| 8   | 13 | 8 | 1796.01  | 1745.95 | 72.56 o  |
| 9   | 13 | 8 | 3412.42  | 3357.76 | 129.74 o |
| 10  | 13 | 8 | 215.49   | 162.72  | 19.79 o  |
| 11  | 13 | 8 | 2.25     | -2.20   | 19.79 <  |
| 12  | 13 | 8 | 466.58   | 384.81  | 41.78 o  |
| -14 | 14 | 8 | 135.48   | 90.16   | 28.59 o  |
| -13 | 14 | 8 | 250.41   | 169.32  | 24.19 o  |
| -12 | 14 | 8 | 182.40   | 178.11  | 30.78 o  |
| -11 | 14 | 8 | 26.52    | -8.80   | 26.39 <  |
| -10 | 14 | 8 | 3884.86  | 3755.76 | 138.53 o |
| -9  | 14 | 8 | 249.63   | 230.89  | 35.18 o  |
| -8  | 14 | 8 | 3398.87  | 3421.53 | 134.13 o |
| -7  | 14 | 8 | 597.74   | 587.11  | 37.38 o  |
| -6  | 14 | 8 | 696.15   | 538.74  | 32.98 o  |
| -5  | 14 | 8 | 114.35   | 153.93  | 19.79 o  |
| -4  | 14 | 8 | 774.60   | 853.18  | 43.98 o  |
| -3  | 14 | 8 | 236.40   | 239.68  | 92.35 <  |
| -2  | 14 | 8 | 2885.55  | 3243.41 | 134.13 o |
| -1  | 14 | 8 | 130.23   | 116.54  | 17.59 o  |
| 0   | 14 | 8 | 5867.72  | 6403.27 | 215.49 o |
| 1   | 14 | 8 | 166.66   | 147.33  | 21.99 o  |
| 2   | 14 | 8 | 347.92   | 244.08  | 24.19 o  |
| 3   | 14 | 8 | 1058.82  | 1002.71 | 46.18 o  |
| 4   | 14 | 8 | 69.29    | 68.17   | 15.39 o  |
| 5   | 14 | 8 | 2.29     | -10.99  | 30.78 <  |
| 6   | 14 | 8 | 2145.66  | 2042.80 | 81.36 o  |
| 7   | 14 | 8 | 1.40     | 28.59   | 28.59 <  |
| 8   | 14 | 8 | 10131.30 | 9398.20 | 398.01 o |
| 9   | 14 | 8 | 107.42   | 98.95   | 26.39 o  |
| 10  | 14 | 8 | 1399.52  | 1325.95 | 228.69 o |
| 11  | 14 | 8 | 655.77   | 439.79  | 46.18 o  |
| -13 | 15 | 8 | 276.38   | 116.54  | 30.78 o  |
| -12 | 15 | 8 | 9.45     | 4.40    | 17.59 <  |
| -11 | 15 | 8 | 1406.05  | 1185.22 | 59.37 o  |
| -10 | 15 | 8 | 55.48    | 85.76   | 28.59 o  |
| -9  | 15 | 8 | 2776.63  | 2977.34 | 114.34 o |
| -8  | 15 | 8 | 1951.90  | 1932.85 | 81.36 o  |
| -7  | 15 | 8 | 3676.04  | 3927.28 | 178.11 o |
| -6  | 15 | 8 | 95.69    | 125.34  | 19.79 o  |
| -5  | 15 | 8 | 46.77    | 74.76   | 19.79 o  |
| -4  | 15 | 8 | 89.17    | 81.36   | 17.59 o  |
| -3  | 15 | 8 | 2569.89  | 2761.85 | 105.55 o |
| -2  | 15 | 8 | 245.23   | 246.28  | 21.99 o  |
| -1  | 15 | 8 | 70.69    | 98.95   | 15.39 o  |
| 0   | 15 | 8 | 0.20     | 8.80    | 17.59 <  |
| 1   | 15 | 8 | 2148.89  | 2348.45 | 103.35 o |
| 2   | 15 | 8 | 1447.96  | 1468.88 | 72.56 o  |
| 3   | 15 | 8 | 29.85    | 43.98   | 17.59 <  |
| 4   | 15 | 8 | 144.30   | 153.93  | 21.99 o  |

## regerite.cif

|     |    |   |          |          |        |   |
|-----|----|---|----------|----------|--------|---|
| 5   | 15 | 8 | 2547.65  | 2339.65  | 123.14 | o |
| 6   | 15 | 8 | 7.74     | -8.80    | 24.19  | < |
| 7   | 15 | 8 | 5396.62  | 5281.81  | 184.71 | o |
| 8   | 15 | 8 | 178.09   | 142.93   | 26.39  | o |
| 9   | 15 | 8 | 1061.62  | 774.02   | 70.37  | o |
| 10  | 15 | 8 | 32.67    | 46.18    | 46.18  | < |
| -12 | 16 | 8 | 861.21   | 527.74   | 76.96  | o |
| -11 | 16 | 8 | 1140.75  | 688.26   | 63.77  | o |
| -10 | 16 | 8 | 1011.06  | 866.38   | 52.77  | o |
| -9  | 16 | 8 | 100.98   | 103.35   | 17.59  | o |
| -8  | 16 | 8 | 648.50   | 565.12   | 35.18  | o |
| -7  | 16 | 8 | 158.49   | 129.74   | 19.79  | o |
| -6  | 16 | 8 | 62.78    | 105.55   | 21.99  | o |
| -5  | 16 | 8 | 87.19    | 68.17    | 215.49 | < |
| -4  | 16 | 8 | 9999.20  | 11260.70 | 402.40 | o |
| -3  | 16 | 8 | 0.81     | -13.19   | 83.56  | < |
| -2  | 16 | 8 | 13357.70 | 15324.30 | 501.36 | o |
| -1  | 16 | 8 | 46.75    | 37.38    | 26.39  | < |
| 0   | 16 | 8 | 23768.10 | 26448.70 | 987.32 | o |
| 1   | 16 | 8 | 191.97   | 184.71   | 72.56  | < |
| 2   | 16 | 8 | 17269.00 | 18270.90 | 591.51 | o |
| 3   | 16 | 8 | 117.20   | 101.15   | 17.59  | o |
| 4   | 16 | 8 | 141.69   | 140.73   | 17.59  | o |
| 5   | 16 | 8 | 440.53   | 424.39   | 28.59  | o |
| 6   | 16 | 8 | 3955.37  | 3931.68  | 153.93 | o |
| 7   | 16 | 8 | 338.76   | 321.04   | 32.98  | o |
| 8   | 16 | 8 | 1786.46  | 1367.73  | 94.55  | o |
| 9   | 16 | 8 | 825.04   | 468.37   | 79.16  | o |
| -10 | 17 | 8 | 0.36     | -4.40    | 24.19  | < |
| -9  | 17 | 8 | 901.16   | 734.44   | 48.38  | o |
| -8  | 17 | 8 | 53.06    | 65.97    | 17.59  | o |
| -7  | 17 | 8 | 2150.41  | 1998.82  | 81.36  | o |
| -6  | 17 | 8 | 209.22   | 222.09   | 21.99  | o |
| -5  | 17 | 8 | 210.27   | 206.70   | 28.59  | o |
| -4  | 17 | 8 | 10.66    | 2.20     | 15.39  | < |
| -3  | 17 | 8 | 1099.14  | 1079.67  | 68.17  | o |
| -2  | 17 | 8 | 12.42    | 4.40     | 13.19  | < |
| -1  | 17 | 8 | 209.93   | 197.90   | 21.99  | o |
| 0   | 17 | 8 | 409.34   | 470.57   | 32.98  | o |
| 1   | 17 | 8 | 779.77   | 697.06   | 39.58  | o |
| 2   | 17 | 8 | 179.21   | 125.34   | 19.79  | o |
| 3   | 17 | 8 | 557.16   | 483.76   | 35.18  | o |
| 4   | 17 | 8 | 1398.43  | 1268.78  | 63.77  | o |
| 5   | 17 | 8 | 531.71   | 483.76   | 35.18  | o |
| 6   | 17 | 8 | 37.56    | 76.96    | 85.76  | < |
| 7   | 17 | 8 | 1744.04  | 1583.23  | 105.55 | o |
| 8   | 17 | 8 | 185.67   | 48.38    | 87.96  | < |
| -9  | 18 | 8 | 7.66     | -13.19   | 26.39  | < |
| -8  | 18 | 8 | 3867.13  | 3159.85  | 202.30 | o |
| -7  | 18 | 8 | 1802.83  | 1578.83  | 81.36  | o |
| -6  | 18 | 8 | 1206.05  | 1176.42  | 63.77  | o |
| -5  | 18 | 8 | 2.43     | -2.20    | 15.39  | < |
| -4  | 18 | 8 | 1052.43  | 809.20   | 48.38  | o |
| -3  | 18 | 8 | 4.19     | 10.99    | 17.59  | < |

## regerite.cif

|     |    |   |         |         |          |
|-----|----|---|---------|---------|----------|
| -2  | 18 | 8 | 75.18   | 37.38   | 202.30 < |
| -1  | 18 | 8 | 404.79  | 367.22  | 28.59 o  |
| 0   | 18 | 8 | 836.25  | 701.46  | 39.58 o  |
| 1   | 18 | 8 | 2.08    | 4.40    | 39.58 <  |
| 2   | 18 | 8 | 539.48  | 400.20  | 32.98 o  |
| 3   | 18 | 8 | 3.22    | 6.60    | 19.79 <  |
| 4   | 18 | 8 | 0.71    | 8.80    | 24.19 <  |
| 5   | 18 | 8 | 724.57  | 481.56  | 50.58 o  |
| 6   | 18 | 8 | 84.49   | 76.96   | 54.97 <  |
| -6  | 19 | 8 | 40.35   | -2.20   | 281.46 < |
| -5  | 19 | 8 | 2.88    | 13.19   | 46.18 <  |
| -4  | 19 | 8 | 27.40   | 15.39   | 50.58 <  |
| -3  | 19 | 8 | 837.65  | 503.55  | 50.58 o  |
| -2  | 19 | 8 | 193.24  | 101.15  | 19.79 o  |
| -1  | 19 | 8 | 418.74  | 250.68  | 30.78 o  |
| 0   | 19 | 8 | 2.33    | 6.60    | 21.99 <  |
| 1   | 19 | 8 | 2877.09 | 2271.49 | 246.28 o |
| 2   | 19 | 8 | 157.10  | 160.52  | 81.36 <  |
| 3   | 19 | 8 | 808.50  | 266.07  | 70.37 o  |
| -17 | 1  | 9 | 281.32  | 164.92  | 19.79 o  |
| -16 | 1  | 9 | 684.35  | 578.32  | 41.78 o  |
| -15 | 1  | 9 | 534.07  | 472.77  | 30.78 o  |
| -14 | 1  | 9 | 1127.23 | 901.56  | 46.18 o  |
| -13 | 1  | 9 | 416.45  | 354.03  | 26.39 o  |
| -12 | 1  | 9 | 3056.92 | 2832.21 | 105.55 o |
| -11 | 1  | 9 | 8.05    | 15.39   | 10.99 <  |
| -10 | 1  | 9 | 8159.28 | 8498.84 | 274.86 o |
| -9  | 1  | 9 | 280.59  | 250.68  | 37.38 o  |
| -8  | 1  | 9 | 978.45  | 758.63  | 43.98 o  |
| -7  | 1  | 9 | 43.53   | 6.60    | 17.59 <  |
| -6  | 1  | 9 | 455.40  | 463.97  | 28.59 o  |
| -5  | 1  | 9 | 80.24   | 92.35   | 24.19 o  |
| -4  | 1  | 9 | 3518.54 | 3718.38 | 120.94 o |
| -3  | 1  | 9 | 28.93   | 54.97   | 10.99 o  |
| -2  | 1  | 9 | 8099.57 | 7999.68 | 501.36 o |
| 3   | 1  | 9 | 290.54  | 268.27  | 26.39 o  |
| 4   | 1  | 9 | 677.16  | 767.42  | 39.58 o  |
| 5   | 1  | 9 | 0.05    | 6.60    | 8.80 <   |
| 6   | 1  | 9 | 3455.40 | 3716.18 | 160.52 o |
| 7   | 1  | 9 | 134.40  | 153.93  | 21.99 o  |
| 8   | 1  | 9 | 854.97  | 793.81  | 37.38 o  |
| 9   | 1  | 9 | 281.38  | 237.48  | 21.99 o  |
| 10  | 1  | 9 | 926.84  | 859.78  | 46.18 o  |
| 11  | 1  | 9 | 169.33  | 164.92  | 19.79 o  |
| 12  | 1  | 9 | 4696.92 | 4470.41 | 211.10 o |
| 13  | 1  | 9 | 1694.93 | 1420.50 | 92.35 o  |
| 14  | 1  | 9 | 2156.50 | 1640.40 | 90.16 o  |
| 15  | 1  | 9 | 143.43  | 19.79   | 17.59 <  |
| -17 | 2  | 9 | 3332.42 | 2689.28 | 105.55 o |
| -16 | 2  | 9 | 121.97  | 109.95  | 17.59 o  |
| -15 | 2  | 9 | 476.07  | 354.03  | 37.38 o  |
| -14 | 2  | 9 | 570.16  | 494.76  | 30.78 o  |
| -13 | 2  | 9 | 846.69  | 743.24  | 39.58 o  |
| -12 | 2  | 9 | 916.75  | 736.64  | 54.97 o  |



## regerite.cif

|     |   |   |          |          |         |   |
|-----|---|---|----------|----------|---------|---|
| -11 | 2 | 9 | 4592.27  | 4806.85  | 184.71  | o |
| -10 | 2 | 9 | 3832.07  | 3907.49  | 158.32  | o |
| -9  | 2 | 9 | 7442.34  | 7665.45  | 270.47  | o |
| -8  | 2 | 9 | 85.73    | 52.77    | 17.59   | o |
| -7  | 2 | 9 | 5045.25  | 5470.92  | 259.47  | o |
| -6  | 2 | 9 | 431.20   | 422.19   | 28.59   | o |
| -5  | 2 | 9 | 4525.94  | 5092.71  | 189.11  | o |
| -4  | 2 | 9 | 99.08    | 107.75   | 17.59   | o |
| -3  | 2 | 9 | 260.55   | 268.27   | 21.99   | o |
| -2  | 2 | 9 | 166.09   | 191.31   | 17.59   | o |
| -1  | 2 | 9 | 165.42   | 263.87   | 17.59   | o |
| 0   | 2 | 9 | 27.80    | 15.39    | 8.80    | < |
| 1   | 2 | 9 | 8657.80  | 10071.10 | 450.78  | o |
| 2   | 2 | 9 | 553.79   | 578.32   | 30.78   | o |
| 3   | 2 | 9 | 3041.18  | 3467.70  | 191.31  | o |
| 4   | 2 | 9 | 560.00   | 540.93   | 43.98   | o |
| 5   | 2 | 9 | 1063.19  | 1165.43  | 296.86  | o |
| 6   | 2 | 9 | 89.57    | 107.75   | 41.78   | < |
| 7   | 2 | 9 | 210.74   | 180.31   | 28.59   | o |
| 8   | 2 | 9 | 918.21   | 905.96   | 46.18   | o |
| 9   | 2 | 9 | 687.65   | 635.49   | 43.98   | o |
| 10  | 2 | 9 | 1345.86  | 1237.99  | 70.37   | o |
| 11  | 2 | 9 | 1983.40  | 2012.02  | 87.96   | o |
| 12  | 2 | 9 | 415.48   | 358.42   | 32.98   | o |
| 13  | 2 | 9 | 2769.54  | 2467.19  | 164.92  | o |
| 14  | 2 | 9 | 132.62   | 74.76    | 19.79   | o |
| 15  | 2 | 9 | 85.73    | 10.99    | 21.99   | < |
| -17 | 3 | 9 | 1267.18  | 857.58   | 90.16   | o |
| -16 | 3 | 9 | 148.09   | 160.52   | 19.79   | o |
| -15 | 3 | 9 | 961.39   | 796.01   | 46.18   | o |
| -14 | 3 | 9 | 2826.87  | 2464.99  | 96.75   | o |
| -13 | 3 | 9 | 272.18   | 228.69   | 26.39   | o |
| -12 | 3 | 9 | 1378.42  | 1468.88  | 70.37   | o |
| -11 | 3 | 9 | 859.76   | 747.63   | 41.78   | o |
| -10 | 3 | 9 | 12217.50 | 12659.20 | 439.79  | o |
| -9  | 3 | 9 | 2056.78  | 2031.81  | 83.56   | o |
| -8  | 3 | 9 | 11897.50 | 12368.90 | 424.39  | o |
| -7  | 3 | 9 | 624.64   | 587.11   | 32.98   | o |
| -6  | 3 | 9 | 7610.71  | 7957.90  | 257.27  | o |
| -5  | 3 | 9 | 598.95   | 571.72   | 30.78   | o |
| -4  | 3 | 9 | 2124.11  | 2282.48  | 151.73  | o |
| -3  | 3 | 9 | 40.52    | 35.18    | 13.19   | < |
| -2  | 3 | 9 | 3499.73  | 4184.55  | 195.70  | o |
| -1  | 3 | 9 | 119.21   | 149.53   | 24.19   | o |
| 0   | 3 | 9 | 7036.47  | 7465.35  | 334.24  | o |
| 1   | 3 | 9 | 1504.78  | 1629.40  | 79.16   | o |
| 2   | 3 | 9 | 8263.34  | 9818.19  | 446.38  | o |
| 3   | 3 | 9 | 84.82    | 50.58    | 15.39   | o |
| 4   | 3 | 9 | 30433.50 | 32500.10 | 1449.09 | o |
| 5   | 3 | 9 | 122.96   | 74.76    | 105.55  | < |
| 6   | 3 | 9 | 17458.30 | 19625.40 | 888.36  | o |
| 7   | 3 | 9 | 104.75   | 98.95    | 19.79   | o |
| 8   | 3 | 9 | 5629.34  | 6229.55  | 204.50  | o |
| 9   | 3 | 9 | 655.86   | 661.88   | 32.98   | o |

## regerite.cif

|     |   |   |          |          |           |
|-----|---|---|----------|----------|-----------|
| 10  | 3 | 9 | 3227.22  | 2860.80  | 125.34 o  |
| 11  | 3 | 9 | 2170.01  | 2201.12  | 83.56 o   |
| 12  | 3 | 9 | 748.70   | 617.90   | 35.18 o   |
| 13  | 3 | 9 | 3399.28  | 2759.65  | 142.93 o  |
| 14  | 3 | 9 | 93.12    | 101.15   | 19.79 o   |
| 15  | 3 | 9 | 845.59   | 446.38   | 50.58 o   |
| -17 | 4 | 9 | 128.03   | 83.56    | 15.39 o   |
| -16 | 4 | 9 | 2209.24  | 1708.56  | 72.56 o   |
| -15 | 4 | 9 | 588.24   | 430.99   | 30.78 o   |
| -14 | 4 | 9 | 1731.99  | 1750.34  | 74.76 o   |
| -13 | 4 | 9 | 5.88     | -2.20    | 19.79 <   |
| -12 | 4 | 9 | 1591.56  | 1679.98  | 87.96 o   |
| -11 | 4 | 9 | 21.70    | 26.39    | 17.59 <   |
| -10 | 4 | 9 | 399.89   | 373.82   | 30.78 o   |
| -9  | 4 | 9 | 127.22   | 92.35    | 48.38 <   |
| -8  | 4 | 9 | 255.00   | 195.70   | 19.79 o   |
| -7  | 4 | 9 | 7007.51  | 7427.96  | 244.08 o  |
| -6  | 4 | 9 | 6.22     | 8.80     | 35.18 <   |
| -5  | 4 | 9 | 13588.30 | 14732.80 | 595.91 o  |
| -4  | 4 | 9 | 1100.15  | 1314.96  | 74.76 o   |
| -3  | 4 | 9 | 26691.40 | 33520.40 | 1499.67 o |
| -2  | 4 | 9 | 26.40    | 4.40     | 19.79 <   |
| -1  | 4 | 9 | 28979.00 | 34938.70 | 1561.24 o |
| 0   | 4 | 9 | 367.23   | 351.83   | 28.59 o   |
| 1   | 4 | 9 | 14072.90 | 15502.40 | 697.06 o  |
| 2   | 4 | 9 | 1.34     | 10.99    | 10.99 <   |
| 3   | 4 | 9 | 714.22   | 666.27   | 50.58 o   |
| 4   | 4 | 9 | 1040.72  | 1132.45  | 96.75 o   |
| 5   | 4 | 9 | 30.85    | 19.79    | 32.98 <   |
| 6   | 4 | 9 | 2801.33  | 2948.76  | 197.90 o  |
| 7   | 4 | 9 | 3862.61  | 3760.16  | 184.71 o  |
| 8   | 4 | 9 | 157.95   | 158.32   | 17.59 o   |
| 9   | 4 | 9 | 3830.93  | 3980.05  | 145.13 o  |
| 10  | 4 | 9 | 851.42   | 798.21   | 39.58 o   |
| 11  | 4 | 9 | 1241.96  | 1123.65  | 61.57 o   |
| 12  | 4 | 9 | 20.43    | 52.77    | 13.19 o   |
| 13  | 4 | 9 | 6093.33  | 5963.48  | 206.70 o  |
| 14  | 4 | 9 | 2.67     | 8.80     | 19.79 <   |
| 15  | 4 | 9 | 1738.32  | 1244.59  | 87.96 o   |
| -17 | 5 | 9 | 314.79   | 228.69   | 24.19 o   |
| -16 | 5 | 9 | 5657.37  | 5000.35  | 180.31 o  |
| -15 | 5 | 9 | 232.46   | 191.31   | 28.59 o   |
| -14 | 5 | 9 | 6358.77  | 6667.14  | 250.68 o  |
| -13 | 5 | 9 | 455.38   | 428.79   | 35.18 o   |
| -12 | 5 | 9 | 7043.65  | 7676.44  | 369.42 o  |
| -11 | 5 | 9 | 248.10   | 219.89   | 26.39 o   |
| -10 | 5 | 9 | 863.92   | 791.61   | 43.98 o   |
| -9  | 5 | 9 | 26.43    | 43.98    | 15.39 <   |
| -8  | 5 | 9 | 4222.08  | 4428.63  | 169.32 o  |
| -7  | 5 | 9 | 690.32   | 714.65   | 39.58 o   |
| -6  | 5 | 9 | 8294.92  | 8982.60  | 290.26 o  |
| -5  | 5 | 9 | 3.41     | 4.40     | 21.99 <   |
| -4  | 5 | 9 | 5744.53  | 5978.87  | 277.06 o  |
| -3  | 5 | 9 | 62.98    | 54.97    | 28.59 <   |

## regerite.cif

|     |   |   |          |          |           |
|-----|---|---|----------|----------|-----------|
| -2  | 5 | 9 | 15875.60 | 18963.50 | 855.38 o  |
| -1  | 5 | 9 | 52.05    | 17.59    | 338.63 <  |
| 0   | 5 | 9 | 3936.05  | 3612.83  | 173.71 o  |
| 1   | 5 | 9 | 24.06    | 21.99    | 13.19 <   |
| 2   | 5 | 9 | 28.02    | 43.98    | 70.37 <   |
| 3   | 5 | 9 | 866.80   | 969.72   | 70.37 o   |
| 4   | 5 | 9 | 630.56   | 930.15   | 70.37 o   |
| 5   | 5 | 9 | 237.18   | 263.87   | 116.54 <  |
| 6   | 5 | 9 | 808.89   | 820.20   | 65.97 o   |
| 7   | 5 | 9 | 4.39     | -6.60    | 314.45 <  |
| 8   | 5 | 9 | 519.13   | 490.36   | 41.78 o   |
| 9   | 5 | 9 | 437.12   | 371.62   | 26.39 o   |
| 10  | 5 | 9 | 3656.20  | 4325.28  | 173.71 o  |
| 11  | 5 | 9 | 15.40    | 10.99    | 15.39 <   |
| 12  | 5 | 9 | 1.84     | 24.19    | 13.19 <   |
| 13  | 5 | 9 | 70.81    | 59.37    | 15.39 o   |
| 14  | 5 | 9 | 808.80   | 512.35   | 48.38 o   |
| -17 | 6 | 9 | 185.97   | 129.74   | 19.79 o   |
| -16 | 6 | 9 | 245.82   | 211.10   | 28.59 o   |
| -15 | 6 | 9 | 1172.19  | 980.72   | 54.97 o   |
| -14 | 6 | 9 | 1399.32  | 1347.94  | 65.97 o   |
| -13 | 6 | 9 | 583.01   | 426.59   | 30.78 o   |
| -12 | 6 | 9 | 23.09    | 10.99    | 17.59 <   |
| -11 | 6 | 9 | 9119.54  | 9558.72  | 336.43 o  |
| -10 | 6 | 9 | 585.88   | 538.74   | 39.58 o   |
| -9  | 6 | 9 | 7703.51  | 7764.40  | 296.86 o  |
| -8  | 6 | 9 | 98.94    | 107.75   | 28.59 o   |
| -7  | 6 | 9 | 4648.93  | 5299.41  | 189.11 o  |
| -6  | 6 | 9 | 46.33    | 54.97    | 13.19 o   |
| -5  | 6 | 9 | 6829.24  | 7533.51  | 285.86 o  |
| -4  | 6 | 9 | 526.20   | 549.73   | 41.78 o   |
| -3  | 6 | 9 | 1571.17  | 1666.78  | 92.35 o   |
| -2  | 6 | 9 | 392.95   | 417.80   | 43.98 o   |
| -1  | 6 | 9 | 7261.94  | 7865.55  | 376.02 o  |
| 0   | 6 | 9 | 5.77     | -15.39   | 197.90 <  |
| 1   | 6 | 9 | 8808.22  | 9305.85  | 598.11 o  |
| 2   | 6 | 9 | 21.12    | 13.19    | 19.79 <   |
| 3   | 6 | 9 | 15409.90 | 16870.10 | 765.22 o  |
| 4   | 6 | 9 | 50.67    | 65.97    | 24.19 <   |
| 5   | 6 | 9 | 298.62   | 257.27   | 46.18 o   |
| 6   | 6 | 9 | 31.15    | 57.17    | 2047.20 < |
| 7   | 6 | 9 | 1193.87  | 1477.68  | 87.96 o   |
| 8   | 6 | 9 | 104.75   | 118.74   | 17.59 o   |
| 9   | 6 | 9 | 259.44   | 272.67   | 30.78 o   |
| 10  | 6 | 9 | 320.86   | 290.26   | 21.99 o   |
| 11  | 6 | 9 | 4542.75  | 4290.10  | 149.53 o  |
| 12  | 6 | 9 | 272.62   | 257.27   | 24.19 o   |
| 13  | 6 | 9 | 609.03   | 488.16   | 48.38 o   |
| 14  | 6 | 9 | 65.00    | 57.17    | 26.39 <   |
| -16 | 7 | 9 | 2182.77  | 1433.70  | 79.16 o   |
| -15 | 7 | 9 | 949.59   | 802.61   | 81.36 o   |
| -14 | 7 | 9 | 4440.30  | 3874.50  | 257.27 o  |
| -13 | 7 | 9 | 223.49   | 191.31   | 24.19 o   |
| -12 | 7 | 9 | 6375.53  | 7076.14  | 257.27 o  |

## regerite.cif

|     |   |   |          |          |          |
|-----|---|---|----------|----------|----------|
| -11 | 7 | 9 | 445.46   | 334.24   | 41.78 o  |
| -10 | 7 | 9 | 60.96    | 39.58    | 15.39 <  |
| -9  | 7 | 9 | 294.69   | 323.24   | 37.38 o  |
| -8  | 7 | 9 | 1545.30  | 1512.86  | 85.76 o  |
| -7  | 7 | 9 | 31.45    | 35.18    | 43.98 <  |
| -6  | 7 | 9 | 7.21     | 48.38    | 15.39 o  |
| -5  | 7 | 9 | 219.14   | 239.68   | 26.39 o  |
| -4  | 7 | 9 | 501.01   | 573.92   | 59.37 o  |
| -3  | 7 | 9 | 125.32   | 136.33   | 24.19 o  |
| -2  | 7 | 9 | 1307.39  | 1466.68  | 81.36 o  |
| -1  | 7 | 9 | 264.43   | 301.25   | 156.12 < |
| 0   | 7 | 9 | 500.41   | 455.18   | 37.38 o  |
| 1   | 7 | 9 | 121.94   | 138.53   | 21.99 o  |
| 2   | 7 | 9 | 13.26    | 26.39    | 21.99 <  |
| 3   | 7 | 9 | 54.26    | 50.58    | 21.99 <  |
| 4   | 7 | 9 | 62.46    | 131.93   | 24.19 o  |
| 5   | 7 | 9 | 337.41   | 360.62   | 61.57 o  |
| 6   | 7 | 9 | 113.66   | 92.35    | 41.78 <  |
| 7   | 7 | 9 | 11.55    | 0.00     | 41.78 <  |
| 8   | 7 | 9 | 894.90   | 780.62   | 43.98 o  |
| 9   | 7 | 9 | 102.60   | 87.96    | 19.79 o  |
| 10  | 7 | 9 | 33.04    | 26.39    | 15.39 <  |
| 11  | 7 | 9 | 517.65   | 472.77   | 30.78 o  |
| 12  | 7 | 9 | 316.35   | 239.68   | 24.19 o  |
| 13  | 7 | 9 | 1.59     | -10.99   | 26.39 <  |
| 14  | 7 | 9 | 10.77    | 19.79    | 19.79 <  |
| -16 | 8 | 9 | 783.92   | 494.76   | 37.38 o  |
| -15 | 8 | 9 | 6.57     | 19.79    | 17.59 <  |
| -14 | 8 | 9 | 474.83   | 312.25   | 28.59 o  |
| -13 | 8 | 9 | 15.86    | 24.19    | 17.59 <  |
| -12 | 8 | 9 | 711.95   | 719.05   | 43.98 o  |
| -11 | 8 | 9 | 142.01   | 114.34   | 19.79 o  |
| -10 | 8 | 9 | 0.55     | -4.40    | 39.58 <  |
| -9  | 8 | 9 | 13652.10 | 14959.30 | 479.36 o |
| -8  | 8 | 9 | 11.82    | 15.39    | 26.39 <  |
| -7  | 8 | 9 | 12126.50 | 12520.70 | 573.92 o |
| -6  | 8 | 9 | 1.51     | 8.80     | 10.99 <  |
| -5  | 8 | 9 | 12099.40 | 13105.60 | 598.11 o |
| -4  | 8 | 9 | 493.41   | 422.19   | 48.38 o  |
| -3  | 8 | 9 | 9816.15  | 10557.00 | 558.53 o |
| -2  | 8 | 9 | 23.70    | 35.18    | 17.59 <  |
| -1  | 8 | 9 | 6036.27  | 6741.90  | 314.45 o |
| 0   | 8 | 9 | 47.45    | 19.79    | 32.98 <  |
| 1   | 8 | 9 | 2663.80  | 3212.63  | 160.52 o |
| 2   | 8 | 9 | 291.04   | 345.23   | 37.38 o  |
| 3   | 8 | 9 | 5.37     | 21.99    | 19.79 <  |
| 4   | 8 | 9 | 151.34   | 158.32   | 26.39 o  |
| 5   | 8 | 9 | 5831.52  | 6042.64  | 343.03 o |
| 6   | 8 | 9 | 114.52   | 178.11   | 46.18 o  |
| 7   | 8 | 9 | 62.87    | 129.74   | 343.03 < |
| 8   | 8 | 9 | 3000.61  | 3313.78  | 173.71 o |
| 9   | 8 | 9 | 4818.04  | 5055.33  | 182.51 o |
| 10  | 8 | 9 | 43.42    | 48.38    | 13.19 o  |
| 11  | 8 | 9 | 152.12   | 142.93   | 32.98 o  |

## regerite.cif

|     |    |   |          |          |           |
|-----|----|---|----------|----------|-----------|
| 12  | 8  | 9 | 111.54   | 114.34   | 24.19 o   |
| 13  | 8  | 9 | 0.49     | 0.00     | 19.79 <   |
| -15 | 9  | 9 | 8.29     | 15.39    | 17.59 <   |
| -14 | 9  | 9 | 3493.47  | 3511.68  | 215.49 o  |
| -13 | 9  | 9 | 209.62   | 182.51   | 24.19 o   |
| -12 | 9  | 9 | 1356.41  | 1244.59  | 81.36 o   |
| -11 | 9  | 9 | 538.85   | 565.12   | 41.78 o   |
| -10 | 9  | 9 | 7.15     | 13.19    | 24.19 <   |
| -9  | 9  | 9 | 6.59     | 13.19    | 24.19 <   |
| -8  | 9  | 9 | 33.94    | 13.19    | 24.19 <   |
| -7  | 9  | 9 | 1178.92  | 1196.21  | 59.37 o   |
| -6  | 9  | 9 | 22.74    | 24.19    | 13.19 <   |
| -5  | 9  | 9 | 717.84   | 677.27   | 37.38 o   |
| -4  | 9  | 9 | 3007.24  | 3045.51  | 189.11 o  |
| -3  | 9  | 9 | 118.17   | 147.33   | 26.39 o   |
| -2  | 9  | 9 | 798.70   | 1011.50  | 63.77 o   |
| -1  | 9  | 9 | 202.62   | 239.68   | 28.59 o   |
| 0   | 9  | 9 | 13381.10 | 16056.50 | 730.04 o  |
| 1   | 9  | 9 | 467.27   | 518.95   | 46.18 o   |
| 2   | 9  | 9 | 8865.04  | 10376.70 | 477.17 o  |
| 3   | 9  | 9 | 649.48   | 708.05   | 52.77 o   |
| 4   | 9  | 9 | 4253.22  | 4776.06  | 228.69 o  |
| 5   | 9  | 9 | 18.05    | -13.19   | 65.97 <   |
| 6   | 9  | 9 | 21125.00 | 24474.00 | 1576.63 o |
| 7   | 9  | 9 | 794.91   | 1000.51  | 76.96 o   |
| 8   | 9  | 9 | 14456.90 | 19075.70 | 1000.51 o |
| 9   | 9  | 9 | 0.26     | -2.20    | 13.19 <   |
| 10  | 9  | 9 | 427.67   | 391.41   | 26.39 o   |
| 11  | 9  | 9 | 2150.60  | 1906.47  | 85.76 o   |
| 12  | 9  | 9 | 188.32   | 200.10   | 79.16 <   |
| 13  | 9  | 9 | 3436.86  | 3289.59  | 164.92 o  |
| -15 | 10 | 9 | 156.66   | 109.95   | 21.99 o   |
| -14 | 10 | 9 | 1139.16  | 985.12   | 52.77 o   |
| -13 | 10 | 9 | 1617.31  | 1435.90  | 87.96 o   |
| -12 | 10 | 9 | 1010.03  | 872.97   | 63.77 o   |
| -11 | 10 | 9 | 419.59   | 340.83   | 35.18 o   |
| -10 | 10 | 9 | 25.49    | -2.20    | 24.19 <   |
| -9  | 10 | 9 | 1276.05  | 1433.70  | 65.97 o   |
| -8  | 10 | 9 | 687.88   | 701.46   | 43.98 o   |
| -7  | 10 | 9 | 34.17    | 57.17    | 17.59 o   |
| -6  | 10 | 9 | 445.00   | 435.39   | 39.58 o   |
| -5  | 10 | 9 | 12.71    | 19.79    | 15.39 <   |
| -4  | 10 | 9 | 852.07   | 866.38   | 83.56 o   |
| -3  | 10 | 9 | 24526.90 | 27638.30 | 1772.33 o |
| -2  | 10 | 9 | 13.23    | 19.79    | 19.79 <   |
| -1  | 10 | 9 | 10835.70 | 12962.70 | 598.11 o  |
| 0   | 10 | 9 | 0.19     | -28.59   | 59.37 <   |
| 1   | 10 | 9 | 12714.30 | 15023.00 | 679.47 o  |
| 2   | 10 | 9 | 335.43   | 389.21   | 43.98 o   |
| 3   | 10 | 9 | 5976.07  | 7458.75  | 507.95 o  |
| 4   | 10 | 9 | 975.32   | 1048.89  | 90.16 o   |
| 5   | 10 | 9 | 220.07   | 239.68   | 48.38 o   |
| 6   | 10 | 9 | 2298.49  | 2588.13  | 182.51 o  |
| 7   | 10 | 9 | 6456.37  | 7069.54  | 334.24 o  |

## regerite.cif

|     |    |   |          |          |           |
|-----|----|---|----------|----------|-----------|
| 8   | 10 | 9 | 2752.91  | 2926.77  | 114.34 o  |
| 9   | 10 | 9 | 6636.33  | 7054.15  | 248.48 o  |
| 10  | 10 | 9 | 71.93    | 65.97    | 19.79 o   |
| 11  | 10 | 9 | 17103.60 | 17057.10 | 1066.48 o |
| 12  | 10 | 9 | 158.22   | 101.15   | 26.39 o   |
| -14 | 11 | 9 | 191.95   | 65.97    | 28.59 <   |
| -13 | 11 | 9 | 340.53   | 202.30   | 32.98 o   |
| -12 | 11 | 9 | 1745.48  | 1543.64  | 72.56 o   |
| -11 | 11 | 9 | 685.70   | 518.95   | 39.58 o   |
| -10 | 11 | 9 | 9.05     | 6.60     | 17.59 <   |
| -9  | 11 | 9 | 3625.34  | 4072.41  | 149.53 o  |
| -8  | 11 | 9 | 5256.53  | 5519.30  | 191.31 o  |
| -7  | 11 | 9 | 68.16    | 85.76    | 17.59 o   |
| -6  | 11 | 9 | 5332.12  | 5523.70  | 191.31 o  |
| -5  | 11 | 9 | 691.97   | 760.83   | 39.58 o   |
| -4  | 11 | 9 | 6964.72  | 7476.34  | 281.46 o  |
| -3  | 11 | 9 | 396.09   | 387.01   | 30.78 o   |
| -2  | 11 | 9 | 358.78   | 459.58   | 41.78 o   |
| -1  | 11 | 9 | 233.97   | 226.49   | 30.78 o   |
| 0   | 11 | 9 | 5726.57  | 6629.75  | 312.25 o  |
| 1   | 11 | 9 | 265.12   | 283.66   | 37.38 o   |
| 2   | 11 | 9 | 8801.40  | 10594.40 | 490.36 o  |
| 3   | 11 | 9 | 8.79     | 24.19    | 24.19 <   |
| 4   | 11 | 9 | 1458.75  | 1510.66  | 118.74 o  |
| 5   | 11 | 9 | 10.21    | 13.19    | 43.98 <   |
| 6   | 11 | 9 | 2372.62  | 2150.55  | 125.34 o  |
| 7   | 11 | 9 | 151.32   | 70.37    | 164.92 <  |
| 8   | 11 | 9 | 8359.90  | 7863.35  | 301.25 o  |
| 9   | 11 | 9 | 836.76   | 747.63   | 48.38 o   |
| 10  | 11 | 9 | 619.74   | 321.04   | 81.36 o   |
| 11  | 11 | 9 | 3147.06  | 2684.89  | 153.93 o  |
| 12  | 11 | 9 | 1268.56  | 901.56   | 65.97 o   |
| -14 | 12 | 9 | 12.98    | -2.20    | 17.59 <   |
| -13 | 12 | 9 | 4187.66  | 4026.23  | 171.52 o  |
| -12 | 12 | 9 | 7.06     | 30.78    | 26.39 <   |
| -11 | 12 | 9 | 2554.20  | 2460.60  | 116.54 o  |
| -10 | 12 | 9 | 279.40   | 323.24   | 41.78 o   |
| -9  | 12 | 9 | 11491.10 | 12331.60 | 468.37 o  |
| -8  | 12 | 9 | 612.16   | 587.11   | 37.38 o   |
| -7  | 12 | 9 | 2534.40  | 2515.57  | 96.75 o   |
| -6  | 12 | 9 | 30.40    | 15.39    | 15.39 <   |
| -5  | 12 | 9 | 2902.56  | 3203.83  | 131.93 o  |
| -4  | 12 | 9 | 20.35    | 17.59    | 21.99 <   |
| -3  | 12 | 9 | 66.89    | 37.38    | 30.78 <   |
| -2  | 12 | 9 | 734.18   | 861.98   | 52.77 o   |
| -1  | 12 | 9 | 1600.49  | 2042.80  | 112.14 o  |
| 0   | 12 | 9 | 2.22     | -19.79   | 17.59 <   |
| 1   | 12 | 9 | 102.62   | 162.72   | 32.98 o   |
| 2   | 12 | 9 | 0.73     | -4.40    | 24.19 <   |
| 3   | 12 | 9 | 2927.65  | 3177.44  | 167.12 o  |
| 4   | 12 | 9 | 24.90    | 43.98    | 26.39 <   |
| 5   | 12 | 9 | 476.44   | 461.77   | 59.37 o   |
| 6   | 12 | 9 | 52.99    | 17.59    | 43.98 <   |
| 7   | 12 | 9 | 388.52   | 362.82   | 54.97 o   |

## regerite.cif

|     |    |   |          |          |          |
|-----|----|---|----------|----------|----------|
| 8   | 12 | 9 | 130.10   | 98.95    | 224.29 < |
| 9   | 12 | 9 | 726.49   | 507.95   | 85.76 o  |
| 10  | 12 | 9 | 2.61     | -28.59   | 19.79 <  |
| 11  | 12 | 9 | 84.40    | 59.37    | 32.98 <  |
| -13 | 13 | 9 | 60.34    | 68.17    | 19.79 o  |
| -12 | 13 | 9 | 26.71    | 48.38    | 59.37 <  |
| -11 | 13 | 9 | 3.09     | 4.40     | 26.39 <  |
| -10 | 13 | 9 | 1955.68  | 1851.49  | 81.36 o  |
| -9  | 13 | 9 | 80.65    | 50.58    | 19.79 <  |
| -8  | 13 | 9 | 100.36   | 136.33   | 19.79 o  |
| -7  | 13 | 9 | 10.12    | -6.60    | 15.39 <  |
| -6  | 13 | 9 | 3964.45  | 4120.78  | 149.53 o |
| -5  | 13 | 9 | 18.42    | 54.97    | 17.59 o  |
| -4  | 13 | 9 | 21685.20 | 24726.90 | 850.98 o |
| -3  | 13 | 9 | 82.74    | 83.56    | 21.99 o  |
| -2  | 13 | 9 | 2199.87  | 2467.19  | 120.94 o |
| -1  | 13 | 9 | 3.87     | 4.40     | 19.79 <  |
| 0   | 13 | 9 | 19.48    | 72.56    | 30.78 <  |
| 1   | 13 | 9 | 487.08   | 615.70   | 52.77 o  |
| 2   | 13 | 9 | 1180.52  | 1352.34  | 87.96 o  |
| 3   | 13 | 9 | 207.57   | 224.29   | 35.18 o  |
| 4   | 13 | 9 | 10528.50 | 11852.20 | 545.33 o |
| 5   | 13 | 9 | 3.05     | 2.20     | 19.79 <  |
| 6   | 13 | 9 | 3312.14  | 3223.62  | 169.32 o |
| 7   | 13 | 9 | 61.08    | 17.59    | 35.18 <  |
| 8   | 13 | 9 | 2.06     | 6.60     | 48.38 <  |
| 9   | 13 | 9 | 535.90   | 543.13   | 63.77 o  |
| 10  | 13 | 9 | 1028.26  | 927.95   | 79.16 o  |
| -12 | 14 | 9 | 3.57     | 4.40     | 17.59 <  |
| -11 | 14 | 9 | 3306.10  | 2801.43  | 114.34 o |
| -10 | 14 | 9 | 459.94   | 398.01   | 32.98 o  |
| -9  | 14 | 9 | 8.70     | 26.39    | 17.59 <  |
| -8  | 14 | 9 | 0.76     | -4.40    | 15.39 <  |
| -7  | 14 | 9 | 5392.70  | 5954.69  | 208.90 o |
| -6  | 14 | 9 | 100.00   | 98.95    | 21.99 o  |
| -5  | 14 | 9 | 6561.93  | 6449.44  | 224.29 o |
| -4  | 14 | 9 | 43.60    | 43.98    | 15.39 <  |
| -3  | 14 | 9 | 30.89    | 26.39    | 15.39 <  |
| -2  | 14 | 9 | 150.42   | 195.70   | 19.79 o  |
| -1  | 14 | 9 | 3971.06  | 4254.92  | 160.52 o |
| 0   | 14 | 9 | 448.23   | 417.80   | 26.39 o  |
| 1   | 14 | 9 | 4314.42  | 4765.07  | 237.48 o |
| 2   | 14 | 9 | 64.13    | 30.78    | 26.39 <  |
| 3   | 14 | 9 | 36.84    | 52.77    | 26.39 <  |
| 4   | 14 | 9 | 561.15   | 642.09   | 54.97 o  |
| 5   | 14 | 9 | 3291.67  | 2722.27  | 217.69 o |
| 6   | 14 | 9 | 521.28   | 441.98   | 59.37 o  |
| 7   | 14 | 9 | 282.30   | 325.44   | 39.58 o  |
| 8   | 14 | 9 | 92.38    | 138.53   | 50.58 <  |
| 9   | 14 | 9 | 4478.19  | 4153.77  | 215.49 o |
| -10 | 15 | 9 | 8755.55  | 7856.75  | 281.46 o |
| -9  | 15 | 9 | 260.25   | 241.88   | 30.78 o  |
| -8  | 15 | 9 | 329.62   | 292.46   | 30.78 o  |
| -7  | 15 | 9 | 673.33   | 600.31   | 37.38 o  |

## regerite.cif

|    |    |   |          |          |           |
|----|----|---|----------|----------|-----------|
| -6 | 15 | 9 | 49.47    | 65.97    | 17.59 o   |
| -5 | 15 | 9 | 344.11   | 387.01   | 32.98 o   |
| -4 | 15 | 9 | 121.06   | 123.14   | 17.59 o   |
| -3 | 15 | 9 | 7.96     | -6.60    | 41.78 <   |
| -2 | 15 | 9 | 11575.20 | 12116.10 | 514.55 o  |
| -1 | 15 | 9 | 70.89    | 61.57    | 15.39 o   |
| 0  | 15 | 9 | 12650.20 | 13237.50 | 521.15 o  |
| 1  | 15 | 9 | 317.18   | 233.09   | 37.38 o   |
| 2  | 15 | 9 | 1157.79  | 919.15   | 54.97 o   |
| 3  | 15 | 9 | 159.09   | 120.94   | 21.99 o   |
| 4  | 15 | 9 | 1786.09  | 1783.33  | 107.75 o  |
| 5  | 15 | 9 | 186.77   | 158.32   | 32.98 o   |
| 6  | 15 | 9 | 204.65   | 193.51   | 35.18 o   |
| 7  | 15 | 9 | 64.40    | 70.37    | 46.18 <   |
| 8  | 15 | 9 | 181.91   | 189.11   | 50.58 o   |
| -9 | 16 | 9 | 772.52   | 883.97   | 85.76 o   |
| -8 | 16 | 9 | 95.32    | 164.92   | 30.78 o   |
| -7 | 16 | 9 | 1465.14  | 1396.32  | 68.17 o   |
| -6 | 16 | 9 | 98.61    | 83.56    | 19.79 o   |
| -5 | 16 | 9 | 9070.96  | 9319.04  | 318.84 o  |
| -4 | 16 | 9 | 110.51   | 140.73   | 57.17 <   |
| -3 | 16 | 9 | 954.31   | 846.59   | 43.98 o   |
| -2 | 16 | 9 | 165.00   | 191.31   | 24.19 o   |
| -1 | 16 | 9 | 8318.97  | 9378.41  | 441.98 o  |
| 0  | 16 | 9 | 207.34   | 175.91   | 28.59 o   |
| 1  | 16 | 9 | 7374.42  | 7749.01  | 391.41 o  |
| 2  | 16 | 9 | 61.66    | 17.59    | 26.39 <   |
| 3  | 16 | 9 | 1083.58  | 932.34   | 70.37 o   |
| 4  | 16 | 9 | 375.04   | 266.07   | 37.38 o   |
| 5  | 16 | 9 | 3.94     | 28.59    | 26.39 <   |
| 6  | 16 | 9 | 749.91   | 459.58   | 46.18 o   |
| 7  | 16 | 9 | 839.30   | 661.88   | 65.97 o   |
| -7 | 17 | 9 | 295.93   | 274.86   | 46.18 o   |
| -6 | 17 | 9 | 41.52    | 59.37    | 21.99 <   |
| -5 | 17 | 9 | 201.66   | 246.28   | 35.18 o   |
| -4 | 17 | 9 | 2231.18  | 2460.60  | 136.33 o  |
| -3 | 17 | 9 | 178.02   | 259.47   | 63.77 o   |
| -2 | 17 | 9 | 33.31    | 28.59    | 19.79 <   |
| -1 | 17 | 9 | 38.94    | 15.39    | 19.79 <   |
| 0  | 17 | 9 | 247.07   | 186.91   | 30.78 o   |
| 1  | 17 | 9 | 67.32    | 68.17    | 30.78 <   |
| 2  | 17 | 9 | 1369.21  | 1222.60  | 83.56 o   |
| 3  | 17 | 9 | 304.78   | 156.12   | 35.18 o   |
| 4  | 17 | 9 | 23123.70 | 23299.80 | 1064.28 o |
| 5  | 17 | 9 | 149.04   | 68.17    | 39.58 <   |
| 6  | 17 | 9 | 7298.75  | 2656.30  | 206.70 o  |
| -5 | 18 | 9 | 1416.77  | 1609.61  | 138.53 o  |
| -4 | 18 | 9 | 18.54    | 19.79    | 186.91 <  |
| -3 | 18 | 9 | 45.87    | 35.18    | 21.99 <   |
| -2 | 18 | 9 | 71.55    | 74.76    | 24.19 o   |
| -1 | 18 | 9 | 299.66   | 235.29   | 35.18 o   |
| 0  | 18 | 9 | 210.52   | 224.29   | 35.18 o   |
| 1  | 18 | 9 | 1.21     | -2.20    | 19.79 <   |
| 2  | 18 | 9 | 89.47    | 37.38    | 26.39 <   |



## regerite.cif

|     |    |    |          |          |           |
|-----|----|----|----------|----------|-----------|
| 3   | 18 | 9  | 9031.04  | 5532.49  | 428.79 o  |
| -16 | 0  | 10 | 715.26   | 532.14   | 50.58 o   |
| -15 | 0  | 10 | 2143.52  | 1640.40  | 105.55 o  |
| -14 | 0  | 10 | 4268.21  | 3538.07  | 184.71 o  |
| -13 | 0  | 10 | 1645.68  | 1616.21  | 98.95 o   |
| -12 | 0  | 10 | 1962.22  | 1770.13  | 103.35 o  |
| -11 | 0  | 10 | 250.13   | 200.10   | 37.38 o   |
| -10 | 0  | 10 | 80.69    | 98.95    | 26.39 o   |
| -9  | 0  | 10 | 4558.93  | 4479.21  | 213.30 o  |
| -8  | 0  | 10 | 10603.80 | 10231.60 | 545.33 o  |
| -7  | 0  | 10 | 185.63   | 230.89   | 28.59 o   |
| -6  | 0  | 10 | 11717.70 | 13063.80 | 677.27 o  |
| -5  | 0  | 10 | 20.61    | 21.99    | 8.80 <    |
| -4  | 0  | 10 | 13605.70 | 14910.90 | 1339.14 o |
| 7   | 0  | 10 | 526.91   | 554.13   | 70.37 o   |
| 8   | 0  | 10 | 2592.70  | 2843.21  | 266.07 o  |
| 9   | 0  | 10 | 55.05    | -17.59   | 30.78 <   |
| 10  | 0  | 10 | 9321.24  | 9151.92  | 483.76 o  |
| 11  | 0  | 10 | 866.49   | 688.26   | 54.97 o   |
| 12  | 0  | 10 | 107.88   | 52.77    | 19.79 <   |
| -16 | 1  | 10 | 199.42   | 125.34   | 21.99 o   |
| -15 | 1  | 10 | 2114.20  | 1774.53  | 83.56 o   |
| -14 | 1  | 10 | 1717.81  | 1471.08  | 65.97 o   |
| -13 | 1  | 10 | 79.81    | 96.75    | 17.59 o   |
| -12 | 1  | 10 | 32.39    | 43.98    | 63.77 <   |
| -11 | 1  | 10 | 3917.75  | 3865.71  | 153.93 o  |
| -10 | 1  | 10 | 659.91   | 595.91   | 37.38 o   |
| -9  | 1  | 10 | 18110.00 | 18576.50 | 637.69 o  |
| -8  | 1  | 10 | 286.68   | 213.30   | 24.19 o   |
| -7  | 1  | 10 | 46.70    | 87.96    | 39.58 <   |
| -6  | 1  | 10 | 164.84   | 134.13   | 15.39 o   |
| -5  | 1  | 10 | 9597.43  | 10711.00 | 426.59 o  |
| -4  | 1  | 10 | 279.30   | 299.05   | 32.98 o   |
| 6   | 1  | 10 | 615.83   | 1242.39  | 120.94 o  |
| 7   | 1  | 10 | 445.40   | 382.61   | 39.58 o   |
| 8   | 1  | 10 | 17.93    | -4.40    | 70.37 <   |
| 9   | 1  | 10 | 432.37   | 356.23   | 30.78 o   |
| 10  | 1  | 10 | 349.77   | 362.82   | 26.39 o   |
| 11  | 1  | 10 | 2187.49  | 1853.69  | 83.56 o   |
| 12  | 1  | 10 | 123.60   | 59.37    | 21.99 <   |
| -16 | 2  | 10 | 119.23   | 68.17    | 21.99 o   |
| -15 | 2  | 10 | 857.98   | 675.07   | 39.58 o   |
| -14 | 2  | 10 | 2834.52  | 2568.34  | 101.15 o  |
| -13 | 2  | 10 | 72.04    | 68.17    | 17.59 o   |
| -12 | 2  | 10 | 1595.43  | 1433.70  | 79.16 o   |
| -11 | 2  | 10 | 925.30   | 800.41   | 50.58 o   |
| -10 | 2  | 10 | 15145.70 | 16643.70 | 573.92 o  |
| -9  | 2  | 10 | 3980.48  | 3971.26  | 149.53 o  |
| -8  | 2  | 10 | 828.77   | 752.03   | 39.58 o   |
| -7  | 2  | 10 | 341.73   | 351.83   | 30.78 o   |
| -6  | 2  | 10 | 4175.46  | 4613.34  | 156.12 o  |
| -5  | 2  | 10 | 712.56   | 785.02   | 50.58 o   |
| -4  | 2  | 10 | 7145.99  | 8485.65  | 384.81 o  |
| -3  | 2  | 10 | 409.12   | 479.36   | 30.78 o   |

## regerite.cif

|     |   |    |          |          |        |   |
|-----|---|----|----------|----------|--------|---|
| -2  | 2 | 10 | 841.33   | 985.12   | 68.17  | o |
| -1  | 2 | 10 | 0.35     | 15.39    | 8.80   | < |
| 4   | 2 | 10 | 5661.74  | 2045.00  | 186.91 | o |
| 5   | 2 | 10 | 178.68   | 158.32   | 24.19  | o |
| 7   | 2 | 10 | 107.22   | 79.16    | 21.99  | o |
| 8   | 2 | 10 | 6556.11  | 7344.41  | 400.20 | o |
| 9   | 2 | 10 | 207.19   | 235.29   | 28.59  | o |
| 10  | 2 | 10 | 1900.45  | 1657.99  | 101.15 | o |
| 11  | 2 | 10 | 880.05   | 694.86   | 48.38  | o |
| 12  | 2 | 10 | 4876.38  | 4103.19  | 303.45 | o |
| -16 | 3 | 10 | 542.29   | 338.63   | 37.38  | o |
| -15 | 3 | 10 | 3432.79  | 2374.84  | 116.54 | o |
| -14 | 3 | 10 | 572.82   | 503.55   | 32.98  | o |
| -13 | 3 | 10 | 1129.82  | 919.15   | 52.77  | o |
| -12 | 3 | 10 | 57.84    | 41.78    | 17.59  | < |
| -11 | 3 | 10 | 647.44   | 518.95   | 35.18  | o |
| -10 | 3 | 10 | 0.85     | -13.19   | 13.19  | < |
| -9  | 3 | 10 | 15629.70 | 16650.20 | 571.72 | o |
| -8  | 3 | 10 | 2391.79  | 2383.63  | 131.93 | o |
| -7  | 3 | 10 | 3240.67  | 3377.55  | 158.32 | o |
| -6  | 3 | 10 | 165.65   | 250.68   | 59.37  | o |
| -5  | 3 | 10 | 4387.28  | 5235.64  | 244.08 | o |
| -4  | 3 | 10 | 60.63    | 96.75    | 24.19  | o |
| -3  | 3 | 10 | 86.55    | 107.75   | 17.59  | o |
| -2  | 3 | 10 | 1.52     | -4.40    | 10.99  | < |
| -1  | 3 | 10 | 2312.71  | 2552.95  | 120.94 | o |
| 0   | 3 | 10 | 0.50     | 8.80     | 123.14 | < |
| 1   | 3 | 10 | 2730.82  | 3181.84  | 147.33 | o |
| 2   | 3 | 10 | 2.80     | 8.80     | 10.99  | < |
| 3   | 3 | 10 | 10483.60 | 11383.80 | 587.11 | o |
| 4   | 3 | 10 | 95.40    | 68.17    | 15.39  | o |
| 5   | 3 | 10 | 687.18   | 576.12   | 48.38  | o |
| 6   | 3 | 10 | 69.71    | 52.77    | 30.78  | < |
| 7   | 3 | 10 | 88.73    | 85.76    | 46.18  | < |
| 8   | 3 | 10 | 117.06   | 160.52   | 30.78  | o |
| 9   | 3 | 10 | 6.42     | 24.19    | 17.59  | < |
| 10  | 3 | 10 | 2.07     | 10.99    | 10.99  | < |
| 11  | 3 | 10 | 3153.74  | 2728.86  | 127.54 | o |
| 12  | 3 | 10 | 987.71   | 703.66   | 68.17  | o |
| -16 | 4 | 10 | 5700.92  | 3995.44  | 186.91 | o |
| -15 | 4 | 10 | 192.25   | 134.13   | 19.79  | o |
| -14 | 4 | 10 | 847.42   | 721.25   | 48.38  | o |
| -13 | 4 | 10 | 73.77    | 61.57    | 17.59  | o |
| -12 | 4 | 10 | 16.84    | 6.60     | 17.59  | < |
| -11 | 4 | 10 | 562.26   | 417.80   | 41.78  | o |
| -10 | 4 | 10 | 6653.45  | 7438.96  | 290.26 | o |
| -9  | 4 | 10 | 49.72    | 24.19    | 17.59  | < |
| -8  | 4 | 10 | 21503.20 | 22666.50 | 774.02 | o |
| -7  | 4 | 10 | 685.29   | 626.69   | 37.38  | o |
| -6  | 4 | 10 | 87.13    | 87.96    | 72.56  | < |
| -5  | 4 | 10 | 227.37   | 316.64   | 30.78  | o |
| -4  | 4 | 10 | 1986.31  | 2568.34  | 127.54 | o |
| -3  | 4 | 10 | 7.82     | 8.80     | 17.59  | < |
| -2  | 4 | 10 | 1531.14  | 1712.96  | 90.16  | o |

## regerite.cif

|     |   |    |          |          |        |   |
|-----|---|----|----------|----------|--------|---|
| -1  | 4 | 10 | 14.01    | 4.40     | 24.19  | < |
| 0   | 4 | 10 | 10972.70 | 12303.00 | 571.72 | o |
| 1   | 4 | 10 | 215.25   | 224.29   | 21.99  | o |
| 2   | 4 | 10 | 654.60   | 712.45   | 41.78  | o |
| 3   | 4 | 10 | 3.59     | 4.40     | 10.99  | < |
| 4   | 4 | 10 | 6492.50  | 6645.15  | 402.40 | o |
| 5   | 4 | 10 | 209.98   | 222.09   | 26.39  | o |
| 6   | 4 | 10 | 861.75   | 857.58   | 112.14 | o |
| 7   | 4 | 10 | 173.52   | 241.88   | 57.17  | o |
| 8   | 4 | 10 | 9982.45  | 11087.00 | 598.11 | o |
| 9   | 4 | 10 | 175.07   | 233.09   | 48.38  | o |
| 10  | 4 | 10 | 4285.62  | 3795.34  | 175.91 | o |
| 11  | 4 | 10 | 961.55   | 815.80   | 428.79 | < |
| 12  | 4 | 10 | 832.96   | 624.49   | 70.37  | o |
| -16 | 5 | 10 | 2832.82  | 1893.27  | 112.14 | o |
| -15 | 5 | 10 | 1810.99  | 1409.51  | 79.16  | o |
| -14 | 5 | 10 | 178.33   | 120.94   | 21.99  | o |
| -13 | 5 | 10 | 16481.00 | 16524.90 | 584.91 | o |
| -12 | 5 | 10 | 393.34   | 301.25   | 30.78  | o |
| -11 | 5 | 10 | 14388.00 | 14174.30 | 494.76 | o |
| -10 | 5 | 10 | 104.44   | 101.15   | 19.79  | o |
| -9  | 5 | 10 | 8074.39  | 8523.03  | 323.24 | o |
| -8  | 5 | 10 | 50.60    | 28.59    | 28.59  | < |
| -7  | 5 | 10 | 10368.60 | 11498.20 | 474.97 | o |
| -6  | 5 | 10 | 270.69   | 272.67   | 37.38  | o |
| -5  | 5 | 10 | 159.68   | 217.69   | 24.19  | o |
| -4  | 5 | 10 | 159.80   | 184.71   | 24.19  | o |
| -3  | 5 | 10 | 5166.35  | 6033.85  | 404.60 | o |
| -2  | 5 | 10 | 182.34   | 178.11   | 46.18  | o |
| -1  | 5 | 10 | 1506.90  | 1763.54  | 92.35  | o |
| 0   | 5 | 10 | 2.67     | -15.39   | 17.59  | < |
| 1   | 5 | 10 | 4637.76  | 5112.50  | 277.06 | o |
| 2   | 5 | 10 | 4.24     | 19.79    | 10.99  | < |
| 3   | 5 | 10 | 426.58   | 413.40   | 30.78  | o |
| 4   | 5 | 10 | 951.78   | 1007.11  | 70.37  | o |
| 5   | 5 | 10 | 6393.95  | 6647.35  | 551.93 | o |
| 6   | 5 | 10 | 130.10   | 125.34   | 48.38  | < |
| 7   | 5 | 10 | 4716.46  | 5061.92  | 248.48 | o |
| 8   | 5 | 10 | 262.18   | 200.10   | 70.37  | < |
| 9   | 5 | 10 | 2058.84  | 1990.03  | 197.90 | o |
| 10  | 5 | 10 | 118.85   | 96.75    | 35.18  | < |
| 11  | 5 | 10 | 747.67   | 633.29   | 68.17  | o |
| 12  | 5 | 10 | 343.66   | 318.84   | 37.38  | o |
| -15 | 6 | 10 | 143.09   | 98.95    | 19.79  | o |
| -14 | 6 | 10 | 265.22   | 178.11   | 28.59  | o |
| -13 | 6 | 10 | 4923.60  | 4578.16  | 189.11 | o |
| -12 | 6 | 10 | 2202.99  | 2205.52  | 125.34 | o |
| -11 | 6 | 10 | 5599.21  | 5710.60  | 213.30 | o |
| -10 | 6 | 10 | 3870.48  | 3777.75  | 138.53 | o |
| -9  | 6 | 10 | 1834.55  | 1627.20  | 72.56  | o |
| -8  | 6 | 10 | 114.97   | 153.93   | 21.99  | o |
| -7  | 6 | 10 | 1090.89  | 1062.08  | 50.58  | o |
| -6  | 6 | 10 | 96.66    | 142.93   | 21.99  | o |
| -5  | 6 | 10 | 98.98    | 107.75   | 19.79  | o |

## regerite.cif

|     |   |    |          |          |         |   |
|-----|---|----|----------|----------|---------|---|
| -4  | 6 | 10 | 15584.30 | 18196.10 | 824.60  | o |
| -3  | 6 | 10 | 1.48     | 13.19    | 15.39   | < |
| -2  | 6 | 10 | 57046.30 | 68802.10 | 3063.10 | o |
| -1  | 6 | 10 | 38.75    | 28.59    | 85.76   | < |
| 0   | 6 | 10 | 8549.91  | 9173.91  | 481.56  | o |
| 1   | 6 | 10 | 25.59    | 32.98    | 17.59   | < |
| 2   | 6 | 10 | 7266.29  | 7830.37  | 362.82  | o |
| 3   | 6 | 10 | 384.86   | 376.02   | 35.18   | o |
| 4   | 6 | 10 | 7324.65  | 8525.23  | 398.01  | o |
| 5   | 6 | 10 | 243.19   | 235.29   | 30.78   | o |
| 6   | 6 | 10 | 9612.53  | 10765.90 | 492.56  | o |
| 7   | 6 | 10 | 1755.35  | 1719.56  | 105.55  | o |
| 8   | 6 | 10 | 252.02   | 285.86   | 50.58   | o |
| 9   | 6 | 10 | 1933.00  | 2020.81  | 219.89  | o |
| 10  | 6 | 10 | 217.74   | 191.31   | 37.38   | o |
| 11  | 6 | 10 | 28.79    | 46.18    | 24.19   | < |
| 12  | 6 | 10 | 1248.49  | 1042.29  | 72.56   | o |
| -15 | 7 | 10 | 2389.63  | 1530.45  | 79.16   | o |
| -14 | 7 | 10 | 312.77   | 244.08   | 26.39   | o |
| -13 | 7 | 10 | 2664.87  | 2570.54  | 120.94  | o |
| -12 | 7 | 10 | 436.58   | 391.41   | 32.98   | o |
| -11 | 7 | 10 | 9919.28  | 10497.70 | 373.82  | o |
| -10 | 7 | 10 | 5.06     | 26.39    | 26.39   | < |
| -9  | 7 | 10 | 4614.01  | 4466.01  | 186.91  | o |
| -8  | 7 | 10 | 430.02   | 483.76   | 43.98   | o |
| -7  | 7 | 10 | 11722.50 | 12083.10 | 485.96  | o |
| -6  | 7 | 10 | 12.54    | 4.40     | 15.39   | < |
| -5  | 7 | 10 | 2723.36  | 3386.34  | 167.12  | o |
| -4  | 7 | 10 | 68.36    | 118.74   | 30.78   | o |
| -3  | 7 | 10 | 541.07   | 628.89   | 46.18   | o |
| -2  | 7 | 10 | 175.95   | 219.89   | 26.39   | o |
| -1  | 7 | 10 | 5024.03  | 5279.62  | 248.48  | o |
| 0   | 7 | 10 | 366.50   | 461.77   | 37.38   | o |
| 1   | 7 | 10 | 133.98   | 109.95   | 19.79   | o |
| 2   | 7 | 10 | 426.05   | 433.19   | 35.18   | o |
| 3   | 7 | 10 | 15664.80 | 17215.40 | 776.22  | o |
| 4   | 7 | 10 | 28.19    | 21.99    | 37.38   | < |
| 5   | 7 | 10 | 895.66   | 958.73   | 63.77   | o |
| 6   | 7 | 10 | 1704.94  | 1937.25  | 114.34  | o |
| 7   | 7 | 10 | 11433.20 | 12516.30 | 578.32  | o |
| 8   | 7 | 10 | 60.99    | -54.97   | 83.56   | < |
| 9   | 7 | 10 | 4229.28  | 4582.56  | 233.09  | o |
| 10  | 7 | 10 | 3.26     | -8.80    | 32.98   | < |
| 11  | 7 | 10 | 38.23    | 41.78    | 211.10  | < |
| 12  | 7 | 10 | 767.74   | 507.95   | 50.58   | o |
| -14 | 8 | 10 | 392.21   | 283.66   | 28.59   | o |
| -13 | 8 | 10 | 1128.23  | 1022.50  | 54.97   | o |
| -12 | 8 | 10 | 258.80   | 213.30   | 24.19   | o |
| -11 | 8 | 10 | 452.68   | 376.02   | 35.18   | o |
| -10 | 8 | 10 | 1731.37  | 1508.46  | 70.37   | o |
| -9  | 8 | 10 | 2.33     | -4.40    | 70.37   | < |
| -8  | 8 | 10 | 1555.93  | 1774.53  | 87.96   | o |
| -7  | 8 | 10 | 828.19   | 857.58   | 65.97   | o |
| -6  | 8 | 10 | 1844.27  | 2218.71  | 164.92  | o |

## regerite.cif

|     |    |    |          |          |        |   |
|-----|----|----|----------|----------|--------|---|
| -5  | 8  | 10 | 9.80     | -17.59   | 13.19  | < |
| -4  | 8  | 10 | 97.30    | 125.34   | 21.99  | o |
| -3  | 8  | 10 | 41.45    | 65.97    | 19.79  | o |
| -2  | 8  | 10 | 11930.30 | 13675.10 | 626.69 | o |
| -1  | 8  | 10 | 119.07   | 131.93   | 21.99  | o |
| 0   | 8  | 10 | 115.11   | 151.73   | 24.19  | o |
| 1   | 8  | 10 | 434.77   | 463.97   | 37.38  | o |
| 2   | 8  | 10 | 412.48   | 395.81   | 37.38  | o |
| 3   | 8  | 10 | 0.69     | -10.99   | 19.79  | < |
| 4   | 8  | 10 | 116.36   | 149.53   | 35.18  | o |
| 5   | 8  | 10 | 11.72    | 28.59    | 24.19  | < |
| 6   | 8  | 10 | 2586.57  | 2711.27  | 149.53 | o |
| 7   | 8  | 10 | 606.73   | 661.88   | 116.54 | o |
| 8   | 8  | 10 | 145.76   | 173.71   | 30.78  | o |
| 9   | 8  | 10 | 47.09    | 140.73   | 50.58  | < |
| 10  | 8  | 10 | 1655.67  | 1578.83  | 123.14 | o |
| 11  | 8  | 10 | 127.89   | 158.32   | 35.18  | o |
| 12  | 8  | 10 | 52.72    | 48.38    | 37.38  | < |
| -14 | 9  | 10 | 227.06   | 131.93   | 28.59  | o |
| -13 | 9  | 10 | 3076.15  | 2451.80  | 120.94 | o |
| -12 | 9  | 10 | 198.07   | 189.11   | 39.58  | o |
| -11 | 9  | 10 | 15.59    | 37.38    | 15.39  | < |
| -10 | 9  | 10 | 455.95   | 347.43   | 35.18  | o |
| -9  | 9  | 10 | 21.73    | -17.59   | 24.19  | < |
| -8  | 9  | 10 | 61.43    | 43.98    | 13.19  | o |
| -7  | 9  | 10 | 557.41   | 554.13   | 35.18  | o |
| -6  | 9  | 10 | 44.71    | 74.76    | 21.99  | o |
| -5  | 9  | 10 | 3969.99  | 4855.22  | 228.69 | o |
| -4  | 9  | 10 | 94.89    | 118.74   | 21.99  | o |
| -3  | 9  | 10 | 10040.60 | 10959.40 | 503.55 | o |
| -2  | 9  | 10 | 639.07   | 697.06   | 52.77  | o |
| -1  | 9  | 10 | 2300.40  | 2475.99  | 131.93 | o |
| 0   | 9  | 10 | 39.55    | 39.58    | 17.59  | < |
| 1   | 9  | 10 | 33.18    | 13.19    | 15.39  | < |
| 2   | 9  | 10 | 164.37   | 142.93   | 30.78  | o |
| 3   | 9  | 10 | 1946.31  | 2064.79  | 112.14 | o |
| 4   | 9  | 10 | 26.86    | 57.17    | 61.57  | < |
| 5   | 9  | 10 | 11414.60 | 12683.40 | 842.19 | o |
| 6   | 9  | 10 | 14.17    | 39.58    | 46.18  | < |
| 7   | 9  | 10 | 69.58    | 96.75    | 26.39  | o |
| 8   | 9  | 10 | 1483.83  | 1363.33  | 248.48 | o |
| 9   | 9  | 10 | 1668.79  | 1442.49  | 114.34 | o |
| 10  | 9  | 10 | 1148.13  | 883.97   | 98.95  | o |
| 11  | 9  | 10 | 1550.04  | 1110.46  | 140.73 | o |
| -13 | 10 | 10 | 25.88    | 63.77    | 37.38  | < |
| -12 | 10 | 10 | 124.29   | 189.11   | 37.38  | o |
| -11 | 10 | 10 | 0.21     | -6.60    | 26.39  | < |
| -10 | 10 | 10 | 66.61    | 87.96    | 26.39  | o |
| -9  | 10 | 10 | 29.85    | 65.97    | 26.39  | < |
| -8  | 10 | 10 | 2709.71  | 2698.08  | 107.75 | o |
| -7  | 10 | 10 | 186.37   | 127.54   | 17.59  | o |
| -6  | 10 | 10 | 1589.69  | 1877.88  | 105.55 | o |
| -5  | 10 | 10 | 134.14   | 142.93   | 37.38  | o |
| -4  | 10 | 10 | 2873.08  | 3001.53  | 151.73 | o |

## regerite.cif

|     |    |    |         |          |        |   |
|-----|----|----|---------|----------|--------|---|
| -3  | 10 | 10 | 90.15   | 83.56    | 21.99  | o |
| -2  | 10 | 10 | 19.40   | 30.78    | 26.39  | < |
| -1  | 10 | 10 | 125.58  | 219.89   | 41.78  | o |
| 0   | 10 | 10 | 8828.93 | 11234.30 | 741.04 | o |
| 1   | 10 | 10 | 61.59   | 81.36    | 32.98  | < |
| 2   | 10 | 10 | 2978.39 | 4054.82  | 294.66 | o |
| 3   | 10 | 10 | 157.65  | 140.73   | 30.78  | o |
| 4   | 10 | 10 | 1934.13 | 2075.78  | 114.34 | o |
| 5   | 10 | 10 | 427.54  | 428.79   | 46.18  | o |
| 6   | 10 | 10 | 69.91   | 54.97    | 46.18  | < |
| 7   | 10 | 10 | 19.59   | 54.97    | 46.18  | < |
| 8   | 10 | 10 | 8689.59 | 10082.10 | 527.74 | o |
| 9   | 10 | 10 | 82.74   | 26.39    | 46.18  | < |
| 10  | 10 | 10 | 6092.13 | 5741.39  | 439.79 | o |
| 11  | 10 | 10 | 373.21  | 356.23   | 46.18  | o |
| -13 | 11 | 10 | 1543.63 | 1431.50  | 101.15 | o |
| -12 | 11 | 10 | 15.52   | 30.78    | 50.58  | < |
| -11 | 11 | 10 | 1657.61 | 1646.99  | 90.16  | o |
| -10 | 11 | 10 | 274.88  | 248.48   | 32.98  | o |
| -9  | 11 | 10 | 2306.19 | 2148.35  | 90.16  | o |
| -8  | 11 | 10 | 63.95   | 46.18    | 17.59  | < |
| -7  | 11 | 10 | 2531.11 | 2583.74  | 101.15 | o |
| -6  | 11 | 10 | 36.62   | 59.37    | 15.39  | o |
| -5  | 11 | 10 | 3344.69 | 3707.39  | 191.31 | o |
| -4  | 11 | 10 | 3.44    | -4.40    | 17.59  | < |
| -3  | 11 | 10 | 896.04  | 1037.89  | 70.37  | o |
| -2  | 11 | 10 | 64.74   | 46.18    | 30.78  | < |
| -1  | 11 | 10 | 6113.05 | 8921.03  | 576.12 | o |
| 0   | 11 | 10 | 20.75   | 26.39    | 26.39  | < |
| 1   | 11 | 10 | 12.13   | 48.38    | 26.39  | < |
| 2   | 11 | 10 | 22.13   | 19.79    | 19.79  | < |
| 3   | 11 | 10 | 289.07  | 299.05   | 39.58  | o |
| 4   | 11 | 10 | 298.47  | 281.46   | 37.38  | o |
| 5   | 11 | 10 | 96.74   | 90.16    | 28.59  | o |
| 6   | 11 | 10 | 13.67   | 17.59    | 24.19  | < |
| 7   | 11 | 10 | 293.55  | 303.45   | 57.17  | o |
| 8   | 11 | 10 | 470.91  | 382.61   | 59.37  | o |
| 9   | 11 | 10 | 134.80  | 17.59    | 94.55  | < |
| 10  | 11 | 10 | 768.28  | 598.11   | 59.37  | o |
| -12 | 12 | 10 | 123.47  | 171.52   | 50.58  | o |
| -11 | 12 | 10 | 219.59  | 323.24   | 54.97  | o |
| -10 | 12 | 10 | 3744.96 | 3113.68  | 171.52 | o |
| -9  | 12 | 10 | 1924.94 | 1563.43  | 83.56  | o |
| -8  | 12 | 10 | 1529.30 | 1361.13  | 70.37  | o |
| -7  | 12 | 10 | 330.15  | 274.86   | 24.19  | o |
| -6  | 12 | 10 | 5564.72 | 5948.09  | 237.48 | o |
| -5  | 12 | 10 | 28.50   | 57.17    | 21.99  | < |
| -4  | 12 | 10 | 4808.86 | 5633.64  | 274.86 | o |
| -3  | 12 | 10 | 169.68  | 241.88   | 32.98  | o |
| -2  | 12 | 10 | 1632.44 | 1820.71  | 105.55 | o |
| -1  | 12 | 10 | 471.39  | 499.16   | 46.18  | o |
| 0   | 12 | 10 | 298.43  | 288.06   | 32.98  | o |
| 1   | 12 | 10 | 198.15  | 215.49   | 30.78  | o |
| 2   | 12 | 10 | 1217.05 | 1367.73  | 87.96  | o |

## regerite.cif

|     |    |    |          |          |        |   |
|-----|----|----|----------|----------|--------|---|
| 3   | 12 | 10 | 146.38   | 136.33   | 30.78  | o |
| 4   | 12 | 10 | 134.98   | 96.75    | 28.59  | o |
| 5   | 12 | 10 | 677.92   | 606.90   | 52.77  | o |
| 6   | 12 | 10 | 613.61   | 501.36   | 48.38  | o |
| 7   | 12 | 10 | 30.68    | 32.98    | 46.18  | < |
| 8   | 12 | 10 | 848.43   | 855.38   | 94.55  | o |
| 9   | 12 | 10 | 212.36   | 230.89   | 37.38  | o |
| -11 | 13 | 10 | 16.62    | 48.38    | 46.18  | < |
| -10 | 13 | 10 | 563.64   | 556.33   | 52.77  | o |
| -9  | 13 | 10 | 8168.67  | 10189.80 | 479.36 | o |
| -8  | 13 | 10 | 4.44     | -2.20    | 17.59  | < |
| -7  | 13 | 10 | 4940.34  | 4600.15  | 197.90 | o |
| -6  | 13 | 10 | 544.96   | 580.52   | 39.58  | o |
| -5  | 13 | 10 | 10008.90 | 11117.80 | 435.39 | o |
| -4  | 13 | 10 | 539.96   | 551.93   | 48.38  | o |
| -3  | 13 | 10 | 16311.30 | 21281.20 | 967.53 | o |
| -2  | 13 | 10 | 91.19    | 136.33   | 26.39  | o |
| -1  | 13 | 10 | 111.75   | 136.33   | 26.39  | o |
| 0   | 13 | 10 | 15.23    | 43.98    | 19.79  | < |
| 1   | 13 | 10 | 2549.72  | 2906.98  | 153.93 | o |
| 2   | 13 | 10 | 13.21    | 35.18    | 24.19  | < |
| 3   | 13 | 10 | 6118.96  | 6843.05  | 327.64 | o |
| 4   | 13 | 10 | 439.61   | 452.98   | 48.38  | o |
| 5   | 13 | 10 | 10186.80 | 10805.50 | 507.95 | o |
| 6   | 13 | 10 | 578.42   | 211.10   | 63.77  | o |
| 7   | 13 | 10 | 2573.28  | 2724.47  | 193.51 | o |
| 8   | 13 | 10 | 44.18    | 48.38    | 48.38  | < |
| -10 | 14 | 10 | 603.13   | 639.89   | 54.97  | o |
| -9  | 14 | 10 | 581.80   | 613.50   | 52.77  | o |
| -8  | 14 | 10 | 2246.31  | 2291.28  | 127.54 | o |
| -7  | 14 | 10 | 1.63     | 15.39    | 15.39  | < |
| -6  | 14 | 10 | 1924.04  | 2412.22  | 197.90 | o |
| -5  | 14 | 10 | 21.65    | 30.78    | 17.59  | < |
| -4  | 14 | 10 | 837.22   | 998.31   | 85.76  | o |
| -3  | 14 | 10 | 2.11     | -4.40    | 15.39  | < |
| -2  | 14 | 10 | 1188.60  | 1402.91  | 87.96  | o |
| -1  | 14 | 10 | 165.61   | 228.69   | 32.98  | o |
| 0   | 14 | 10 | 9490.77  | 11366.20 | 527.74 | o |
| 1   | 14 | 10 | 139.28   | 98.95    | 24.19  | o |
| 2   | 14 | 10 | 1094.93  | 1145.64  | 79.16  | o |
| 3   | 14 | 10 | 476.03   | 351.83   | 72.56  | o |
| 4   | 14 | 10 | 1224.18  | 991.72   | 72.56  | o |
| 5   | 14 | 10 | 36.45    | 65.97    | 30.78  | < |
| 6   | 14 | 10 | 3374.63  | 3483.09  | 217.69 | o |
| 7   | 14 | 10 | 11.66    | 2.20     | 24.19  | < |
| -9  | 15 | 10 | 1102.95  | 916.95   | 90.16  | o |
| -8  | 15 | 10 | 150.37   | 127.54   | 24.19  | o |
| -7  | 15 | 10 | 450.27   | 430.99   | 41.78  | o |
| -6  | 15 | 10 | 485.38   | 567.32   | 50.58  | o |
| -5  | 15 | 10 | 57.15    | -8.80    | 17.59  | < |
| -4  | 15 | 10 | 104.39   | 74.76    | 21.99  | o |
| -3  | 15 | 10 | 349.58   | 391.41   | 48.38  | o |
| -2  | 15 | 10 | 0.49     | 6.60     | 30.78  | < |
| -1  | 15 | 10 | 911.96   | 875.17   | 81.36  | o |

## regerite.cif

|     |    |    |          |          |         |   |
|-----|----|----|----------|----------|---------|---|
| 0   | 15 | 10 | 174.33   | 175.91   | 30.78   | o |
| 1   | 15 | 10 | 5359.48  | 5904.11  | 409.00  | o |
| 2   | 15 | 10 | 46.30    | 41.78    | 19.79   | < |
| 3   | 15 | 10 | 3600.74  | 3931.68  | 239.68  | o |
| 4   | 15 | 10 | 172.94   | 169.32   | 35.18   | o |
| 5   | 15 | 10 | 40.49    | 30.78    | 28.59   | < |
| 6   | 15 | 10 | 31.98    | 15.39    | 24.19   | < |
| -7  | 16 | 10 | 194.84   | 219.89   | 41.78   | o |
| -6  | 16 | 10 | 33.99    | 8.80     | 19.79   | < |
| -5  | 16 | 10 | 8.37     | 0.00     | 17.59   | < |
| -4  | 16 | 10 | 77.25    | 61.57    | 21.99   | < |
| -3  | 16 | 10 | 42.04    | 59.37    | 24.19   | < |
| -2  | 16 | 10 | 159.10   | 112.14   | 26.39   | o |
| -1  | 16 | 10 | 87.19    | 59.37    | 24.19   | < |
| 0   | 16 | 10 | 971.50   | 894.96   | 65.97   | o |
| 1   | 16 | 10 | 321.45   | 301.25   | 37.38   | o |
| 2   | 16 | 10 | 2366.14  | 2482.58  | 162.72  | o |
| 3   | 16 | 10 | 462.65   | 307.85   | 41.78   | o |
| 4   | 16 | 10 | 3211.45  | 2684.89  | 237.48  | o |
| -4  | 17 | 10 | 20.24    | 6.60     | 17.59   | < |
| -3  | 17 | 10 | 51.77    | 72.56    | 24.19   | < |
| -2  | 17 | 10 | 5.23     | 4.40     | 17.59   | < |
| -1  | 17 | 10 | 56.69    | 35.18    | 19.79   | < |
| 0   | 17 | 10 | 2.49     | 13.19    | 17.59   | < |
| 1   | 17 | 10 | 2486.40  | 2130.76  | 147.33  | o |
| -15 | 1  | 11 | 134.54   | 65.97    | 26.39   | < |
| -14 | 1  | 11 | 7475.71  | 7040.95  | 259.47  | o |
| -13 | 1  | 11 | 266.89   | 217.69   | 24.19   | o |
| -12 | 1  | 11 | 4731.09  | 3375.35  | 193.51  | o |
| -11 | 1  | 11 | 0.15     | 4.40     | 15.39   | < |
| -10 | 1  | 11 | 12.87    | 17.59    | 15.39   | < |
| -9  | 1  | 11 | 217.15   | 219.89   | 46.18   | o |
| -8  | 1  | 11 | 51.83    | 37.38    | 21.99   | < |
| -7  | 1  | 11 | 59.79    | 37.38    | 13.19   | < |
| -6  | 1  | 11 | 5505.73  | 6093.22  | 277.06  | o |
| -5  | 1  | 11 | 261.17   | 340.83   | 59.37   | o |
| -14 | 2  | 11 | 235.22   | 162.72   | 21.99   | o |
| -13 | 2  | 11 | 880.18   | 591.51   | 41.78   | o |
| -12 | 2  | 11 | 84.81    | 19.79    | 21.99   | < |
| -11 | 2  | 11 | 61.89    | 76.96    | 24.19   | o |
| -10 | 2  | 11 | 204.74   | 162.72   | 19.79   | o |
| -9  | 2  | 11 | 1965.01  | 1860.29  | 116.54  | o |
| -8  | 2  | 11 | 5.62     | 10.99    | 24.19   | < |
| -7  | 2  | 11 | 2658.83  | 2858.60  | 175.91  | o |
| -6  | 2  | 11 | 47.80    | 43.98    | 15.39   | < |
| -5  | 2  | 11 | 8448.79  | 9466.37  | 606.90  | o |
| -4  | 2  | 11 | 174.29   | 191.31   | 43.98   | o |
| -3  | 2  | 11 | 10953.80 | 13534.40 | 1209.41 | o |
| 8   | 2  | 11 | 31.42    | 39.58    | 19.79   | < |
| -14 | 3  | 11 | 340.25   | 197.90   | 24.19   | o |
| -13 | 3  | 11 | 557.88   | 354.03   | 32.98   | o |
| -12 | 3  | 11 | 704.51   | 516.75   | 37.38   | o |
| -11 | 3  | 11 | 17.97    | 57.17    | 19.79   | < |
| -10 | 3  | 11 | 779.74   | 631.09   | 41.78   | o |



## regerite.cif

|     |   |    |         |         |        |   |
|-----|---|----|---------|---------|--------|---|
| -9  | 3 | 11 | 199.31  | 151.73  | 30.78  | o |
| -8  | 3 | 11 | 2363.34 | 2324.26 | 94.55  | o |
| -7  | 3 | 11 | 175.28  | 193.51  | 26.39  | o |
| -6  | 3 | 11 | 5592.42 | 6214.16 | 413.40 | o |
| -5  | 3 | 11 | 57.30   | 81.36   | 19.79  | o |
| -4  | 3 | 11 | 3020.03 | 3949.27 | 182.51 | o |
| -3  | 3 | 11 | 107.83  | 118.74  | 19.79  | o |
| -2  | 3 | 11 | 739.75  | 802.61  | 57.17  | o |
| -1  | 3 | 11 | 126.56  | 87.96   | 15.39  | o |
| 6   | 3 | 11 | 6374.25 | 7278.44 | 387.01 | o |
| 7   | 3 | 11 | 134.07  | 127.54  | 26.39  | o |
| 8   | 3 | 11 | 79.35   | 35.18   | 28.59  | < |
| 9   | 3 | 11 | 534.24  | 178.11  | 41.78  | o |
| -14 | 4 | 11 | 86.77   | 57.17   | 65.97  | < |
| -13 | 4 | 11 | 2060.05 | 1387.52 | 76.96  | o |
| -12 | 4 | 11 | 197.31  | 118.74  | 19.79  | o |
| -11 | 4 | 11 | 1008.23 | 752.03  | 43.98  | o |
| -10 | 4 | 11 | 1.94    | 21.99   | 24.19  | < |
| -9  | 4 | 11 | 2241.65 | 2273.69 | 92.35  | o |
| -8  | 4 | 11 | 254.52  | 171.52  | 35.18  | o |
| -7  | 4 | 11 | 1989.18 | 1941.65 | 107.75 | o |
| -6  | 4 | 11 | 0.29    | -4.40   | 24.19  | < |
| -5  | 4 | 11 | 243.59  | 272.67  | 41.78  | o |
| -4  | 4 | 11 | 197.69  | 272.67  | 26.39  | o |
| -3  | 4 | 11 | 1806.97 | 1974.63 | 109.95 | o |
| -2  | 4 | 11 | 2.40    | 24.19   | 15.39  | < |
| -1  | 4 | 11 | 2236.24 | 2682.69 | 131.93 | o |
| 0   | 4 | 11 | 257.11  | 354.03  | 26.39  | o |
| 1   | 4 | 11 | 8715.92 | 9428.98 | 488.16 | o |
| 2   | 4 | 11 | 21.26   | 4.40    | 8.80   | < |
| 3   | 4 | 11 | 290.67  | -4.40   | 6.60   | < |
| 4   | 4 | 11 | 197.51  | 61.57   | 15.39  | o |
| 5   | 4 | 11 | 341.49  | 398.01  | 37.38  | o |
| 6   | 4 | 11 | 57.31   | 48.38   | 35.18  | < |
| 7   | 4 | 11 | 819.38  | 591.51  | 70.37  | o |
| 8   | 4 | 11 | 41.41   | 24.19   | 17.59  | < |
| -14 | 5 | 11 | 35.09   | 10.99   | 30.78  | < |
| -13 | 5 | 11 | 204.34  | 182.51  | 32.98  | o |
| -12 | 5 | 11 | 739.49  | 622.29  | 39.58  | o |
| -11 | 5 | 11 | 31.70   | 43.98   | 118.74 | < |
| -10 | 5 | 11 | 1530.23 | 1209.41 | 189.11 | o |
| -9  | 5 | 11 | 527.12  | 400.20  | 32.98  | o |
| -8  | 5 | 11 | 1586.42 | 1625.00 | 94.55  | o |
| -7  | 5 | 11 | 436.23  | 435.39  | 41.78  | o |
| -6  | 5 | 11 | 744.09  | 778.42  | 50.58  | o |
| -5  | 5 | 11 | 0.50    | 13.19   | 17.59  | < |
| -4  | 5 | 11 | 1671.58 | 2025.21 | 105.55 | o |
| -3  | 5 | 11 | 49.17   | 70.37   | 28.59  | < |
| -2  | 5 | 11 | 75.42   | 118.74  | 17.59  | o |
| -1  | 5 | 11 | 0.49    | -2.20   | 15.39  | < |
| 0   | 5 | 11 | 2527.22 | 2662.90 | 147.33 | o |
| 1   | 5 | 11 | 28.21   | 37.38   | 10.99  | o |
| 2   | 5 | 11 | 1322.62 | 1218.20 | 101.15 | o |
| 3   | 5 | 11 | 63.73   | 68.17   | 19.79  | o |

## regerite.cif

|     |   |    |         |          |          |
|-----|---|----|---------|----------|----------|
| 4   | 5 | 11 | 1986.42 | 1910.86  | 147.33 o |
| 5   | 5 | 11 | 6.21    | 6.60     | 19.79 <  |
| 7   | 5 | 11 | 1.73    | -13.19   | 54.97 <  |
| 8   | 5 | 11 | 3839.17 | 3329.17  | 233.09 o |
| 9   | 5 | 11 | 94.60   | 13.19    | 13.19 <  |
| -13 | 6 | 11 | 67.30   | 105.55   | 28.59 o  |
| -12 | 6 | 11 | 755.67  | 598.11   | 57.17 o  |
| -11 | 6 | 11 | 1747.04 | 1510.66  | 83.56 o  |
| -10 | 6 | 11 | 398.74  | 387.01   | 76.96 o  |
| -9  | 6 | 11 | 658.79  | 615.70   | 65.97 o  |
| -8  | 6 | 11 | 5.74    | 17.59    | 17.59 <  |
| -7  | 6 | 11 | 256.20  | 283.66   | 32.98 o  |
| -6  | 6 | 11 | 0.71    | 17.59    | 15.39 <  |
| -5  | 6 | 11 | 1300.91 | 1345.74  | 81.36 o  |
| -4  | 6 | 11 | 358.23  | 371.62   | 98.95 o  |
| -3  | 6 | 11 | 164.87  | 138.53   | 21.99 o  |
| -2  | 6 | 11 | 5.38    | 6.60     | 13.19 <  |
| -1  | 6 | 11 | 9859.79 | 11588.30 | 743.24 o |
| 0   | 6 | 11 | 53.94   | 94.55    | 21.99 o  |
| 1   | 6 | 11 | 4571.92 | 5440.14  | 354.03 o |
| 2   | 6 | 11 | 38.73   | 54.97    | 17.59 o  |
| 3   | 6 | 11 | 5896.39 | 6821.06  | 437.59 o |
| 4   | 6 | 11 | 675.37  | 595.91   | 43.98 o  |
| 5   | 6 | 11 | 3.44    | 19.79    | 19.79 <  |
| 6   | 6 | 11 | 177.89  | 169.32   | 37.38 o  |
| 7   | 6 | 11 | 1675.62 | 1266.58  | 81.36 o  |
| 8   | 6 | 11 | 128.73  | 116.54   | 48.38 <  |
| 9   | 6 | 11 | 1582.83 | 21.99    | 24.19 <  |
| -13 | 7 | 11 | 260.53  | 193.51   | 158.32 < |
| -12 | 7 | 11 | 1915.68 | 1820.71  | 136.33 o |
| -11 | 7 | 11 | 42.55   | 48.38    | 37.38 <  |
| -10 | 7 | 11 | 357.77  | 312.25   | 32.98 o  |
| -9  | 7 | 11 | 131.36  | 129.74   | 28.59 o  |
| -8  | 7 | 11 | 14.82   | 4.40     | 24.19 <  |
| -7  | 7 | 11 | 80.90   | 65.97    | 28.59 <  |
| -6  | 7 | 11 | 1375.40 | 1460.09  | 83.56 o  |
| -5  | 7 | 11 | 345.43  | 345.23   | 35.18 o  |
| -4  | 7 | 11 | 990.59  | 1275.38  | 76.96 o  |
| -3  | 7 | 11 | 60.15   | 68.17    | 19.79 o  |
| -2  | 7 | 11 | 2399.30 | 2662.90  | 136.33 o |
| -1  | 7 | 11 | 3.22    | 17.59    | 15.39 <  |
| 0   | 7 | 11 | 1796.76 | 1875.68  | 98.95 o  |
| 1   | 7 | 11 | 77.82   | 87.96    | 17.59 o  |
| 2   | 7 | 11 | 540.47  | 543.13   | 39.58 o  |
| 3   | 7 | 11 | 11.07   | 15.39    | 13.19 <  |
| 4   | 7 | 11 | 44.72   | 72.56    | 28.59 <  |
| 5   | 7 | 11 | 20.03   | 0.00     | 24.19 <  |
| 6   | 7 | 11 | 1019.89 | 875.17   | 63.77 o  |
| 7   | 7 | 11 | 155.53  | 138.53   | 30.78 o  |
| 8   | 7 | 11 | 430.33  | 347.43   | 79.16 o  |
| -13 | 8 | 11 | 1770.73 | 1484.27  | 103.35 o |
| -12 | 8 | 11 | 138.16  | 178.11   | 101.15 < |
| -11 | 8 | 11 | 2954.01 | 3016.92  | 173.71 o |
| -10 | 8 | 11 | 122.37  | 92.35    | 50.58 <  |

## regerite.cif

|     |    |    |         |         |        |   |
|-----|----|----|---------|---------|--------|---|
| -9  | 8  | 11 | 6336.06 | 6686.93 | 312.25 | o |
| -8  | 8  | 11 | 22.04   | 24.19   | 17.59  | < |
| -7  | 8  | 11 | 1245.00 | 1383.12 | 123.14 | o |
| -6  | 8  | 11 | 840.75  | 853.18  | 57.17  | o |
| -5  | 8  | 11 | 1632.38 | 1688.77 | 101.15 | o |
| -4  | 8  | 11 | 24.68   | 26.39   | 17.59  | < |
| -3  | 8  | 11 | 36.14   | 50.58   | 17.59  | < |
| -2  | 8  | 11 | 58.38   | 70.37   | 19.79  | o |
| -1  | 8  | 11 | 24.32   | 28.59   | 15.39  | < |
| 0   | 8  | 11 | 27.26   | 8.80    | 13.19  | < |
| 1   | 8  | 11 | 3433.40 | 3969.06 | 195.70 | o |
| 2   | 8  | 11 | 389.23  | 422.19  | 35.18  | o |
| 3   | 8  | 11 | 1201.64 | 1374.33 | 79.16  | o |
| 4   | 8  | 11 | 3.27    | -10.99  | 19.79  | < |
| 5   | 8  | 11 | 1376.99 | 1336.95 | 83.56  | o |
| 6   | 8  | 11 | 80.31   | 87.96   | 46.18  | < |
| 7   | 8  | 11 | 577.02  | 439.79  | 219.89 | < |
| 8   | 8  | 11 | 85.23   | 48.38   | 228.69 | < |
| -12 | 9  | 11 | 2287.73 | 2187.93 | 134.13 | o |
| -11 | 9  | 11 | 187.26  | 167.12  | 54.97  | o |
| -10 | 9  | 11 | 61.43   | 32.98   | 48.38  | < |
| -9  | 9  | 11 | 10.65   | 21.99   | 54.97  | < |
| -8  | 9  | 11 | 1445.31 | 1341.34 | 70.37  | o |
| -7  | 9  | 11 | 3.11    | 24.19   | 17.59  | < |
| -6  | 9  | 11 | 2280.93 | 2423.21 | 134.13 | o |
| -5  | 9  | 11 | 63.40   | 118.74  | 24.19  | o |
| -4  | 9  | 11 | 724.93  | 809.20  | 70.37  | o |
| -3  | 9  | 11 | 4.04    | 4.40    | 13.19  | < |
| -2  | 9  | 11 | 996.95  | 993.91  | 65.97  | o |
| -1  | 9  | 11 | 11.39   | -13.19  | 13.19  | < |
| 0   | 9  | 11 | 104.18  | 164.92  | 24.19  | o |
| 1   | 9  | 11 | 73.79   | 68.17   | 17.59  | o |
| 2   | 9  | 11 | 7239.48 | 8344.92 | 387.01 | o |
| 3   | 9  | 11 | 3.79    | 4.40    | 15.39  | < |
| 4   | 9  | 11 | 885.33  | 791.61  | 72.56  | o |
| 5   | 9  | 11 | 535.69  | 450.78  | 57.17  | o |
| 6   | 9  | 11 | 621.71  | 628.89  | 61.57  | o |
| 7   | 9  | 11 | 605.66  | 446.38  | 50.58  | o |
| 8   | 9  | 11 | 570.96  | 457.38  | 48.38  | o |
| -11 | 10 | 11 | 6264.85 | 6447.24 | 310.05 | o |
| -10 | 10 | 11 | 143.20  | 175.91  | 41.78  | o |
| -9  | 10 | 11 | 2871.89 | 2799.23 | 153.93 | o |
| -8  | 10 | 11 | 5.93    | -8.80   | 15.39  | < |
| -7  | 10 | 11 | 327.17  | 250.68  | 30.78  | o |
| -6  | 10 | 11 | 14.28   | 54.97   | 24.19  | < |
| -5  | 10 | 11 | 1378.08 | 1539.25 | 92.35  | o |
| -4  | 10 | 11 | 523.73  | 587.11  | 50.58  | o |
| -3  | 10 | 11 | 1099.66 | 1292.97 | 116.54 | o |
| -2  | 10 | 11 | 167.47  | 230.89  | 28.59  | o |
| -1  | 10 | 11 | 8498.90 | 9761.02 | 455.18 | o |
| 0   | 10 | 11 | 0.09    | -15.39  | 13.19  | < |
| 1   | 10 | 11 | 53.20   | 61.57   | 19.79  | o |
| 2   | 10 | 11 | 119.74  | 131.93  | 21.99  | o |
| 3   | 10 | 11 | 30.12   | 61.57   | 19.79  | o |

## regerite.cif

|     |    |    |          |          |          |
|-----|----|----|----------|----------|----------|
| 4   | 10 | 11 | 431.57   | 481.56   | 74.76 o  |
| 5   | 10 | 11 | 30.97    | 54.97    | 28.59 <  |
| 6   | 10 | 11 | 26.27    | 37.38    | 26.39 <  |
| 7   | 10 | 11 | 4883.20  | 5121.29  | 303.45 o |
| 8   | 10 | 11 | 236.22   | 127.54   | 35.18 o  |
| -10 | 11 | 11 | 430.97   | 360.62   | 41.78 o  |
| -9  | 11 | 11 | 45.18    | 59.37    | 21.99 <  |
| -8  | 11 | 11 | 2404.71  | 2825.62  | 167.12 o |
| -7  | 11 | 11 | 12.03    | 57.17    | 19.79 <  |
| -6  | 11 | 11 | 1202.19  | 1548.04  | 94.55 o  |
| -5  | 11 | 11 | 740.53   | 811.40   | 61.57 o  |
| -4  | 11 | 11 | 1390.16  | 1455.69  | 87.96 o  |
| -3  | 11 | 11 | 5.85     | 15.39    | 17.59 <  |
| -2  | 11 | 11 | 2897.16  | 3181.84  | 162.72 o |
| -1  | 11 | 11 | 127.51   | 92.35    | 21.99 o  |
| 0   | 11 | 11 | 2854.42  | 2742.06  | 147.33 o |
| 1   | 11 | 11 | 10.80    | 21.99    | 21.99 <  |
| 2   | 11 | 11 | 42.94    | 54.97    | 19.79 <  |
| 3   | 11 | 11 | 634.99   | 571.72   | 48.38 o  |
| 4   | 11 | 11 | 2588.06  | 2486.98  | 162.72 o |
| 5   | 11 | 11 | 111.24   | 153.93   | 32.98 o  |
| 6   | 11 | 11 | 444.66   | 332.04   | 43.98 o  |
| 7   | 11 | 11 | 510.46   | 299.05   | 39.58 o  |
| -9  | 12 | 11 | 410.96   | 435.39   | 43.98 o  |
| -8  | 12 | 11 | 358.63   | 343.03   | 54.97 o  |
| -7  | 12 | 11 | 2427.73  | 2579.34  | 145.13 o |
| -6  | 12 | 11 | 270.17   | 349.63   | 39.58 o  |
| -5  | 12 | 11 | 6.15     | 13.19    | 15.39 <  |
| -4  | 12 | 11 | 1.16     | 19.79    | 17.59 <  |
| -3  | 12 | 11 | 183.85   | 197.90   | 28.59 o  |
| -2  | 12 | 11 | 75.94    | 63.77    | 21.99 <  |
| -1  | 12 | 11 | 301.00   | 246.28   | 30.78 o  |
| 0   | 12 | 11 | 131.18   | 145.13   | 26.39 o  |
| 1   | 12 | 11 | 11465.20 | 13105.60 | 604.70 o |
| 2   | 12 | 11 | 37.85    | 43.98    | 19.79 <  |
| 3   | 12 | 11 | 6018.44  | 6614.36  | 321.04 o |
| 4   | 12 | 11 | 27.20    | 19.79    | 26.39 <  |
| 5   | 12 | 11 | 8.97     | -28.59   | 24.19 <  |
| 6   | 12 | 11 | 5.81     | 17.59    | 24.19 <  |
| -8  | 13 | 11 | 1869.79  | 1983.43  | 109.95 o |
| -7  | 13 | 11 | 16.22    | 17.59    | 19.79 <  |
| -6  | 13 | 11 | 161.46   | 107.75   | 37.38 <  |
| -5  | 13 | 11 | 8.83     | 8.80     | 17.59 <  |
| -4  | 13 | 11 | 2283.44  | 2330.86  | 145.13 o |
| -3  | 13 | 11 | 28.89    | 43.98    | 19.79 <  |
| -2  | 13 | 11 | 12.10    | -4.40    | 17.59 <  |
| -1  | 13 | 11 | 436.77   | 428.79   | 41.78 o  |
| 0   | 13 | 11 | 4304.38  | 4679.31  | 230.89 o |
| 1   | 13 | 11 | 146.32   | 167.12   | 26.39 o  |
| 2   | 13 | 11 | 49.65    | 43.98    | 17.59 <  |
| 3   | 13 | 11 | 40.34    | 35.18    | 21.99 <  |
| 4   | 13 | 11 | 1681.73  | 1572.23  | 239.68 o |
| 5   | 13 | 11 | 424.23   | 332.04   | 43.98 o  |
| -7  | 14 | 11 | 2170.10  | 2649.70  | 169.32 o |

## regerite.cif

|     |    |    |          |          |        |   |
|-----|----|----|----------|----------|--------|---|
| -6  | 14 | 11 | 14.95    | 59.37    | 19.79  | o |
| -5  | 14 | 11 | 9986.85  | 13637.70 | 622.29 | o |
| -4  | 14 | 11 | 172.05   | 140.73   | 28.59  | o |
| -3  | 14 | 11 | 975.92   | 888.36   | 94.55  | o |
| -2  | 14 | 11 | 19.08    | 8.80     | 17.59  | < |
| -1  | 14 | 11 | 519.01   | 466.17   | 43.98  | o |
| 0   | 14 | 11 | 562.28   | 538.74   | 50.58  | o |
| 1   | 14 | 11 | 72.42    | 74.76    | 19.79  | o |
| 2   | 14 | 11 | 56.66    | 54.97    | 21.99  | < |
| 3   | 14 | 11 | 4470.44  | 5411.55  | 367.22 | o |
| -4  | 15 | 11 | 762.08   | 609.10   | 52.77  | o |
| -3  | 15 | 11 | 15.33    | 35.18    | 21.99  | < |
| -2  | 15 | 11 | 65.33    | 6.60     | 17.59  | < |
| -1  | 15 | 11 | 252.59   | 237.48   | 35.18  | o |
| 0   | 15 | 11 | 1186.78  | 1207.21  | 79.16  | o |
| 1   | 15 | 11 | 168.04   | 129.74   | 26.39  | o |
| -10 | 0  | 12 | 812.90   | 488.16   | 123.14 | o |
| -9  | 0  | 12 | 2.58     | 10.99    | 19.79  | < |
| -8  | 0  | 12 | 1978.19  | 2159.34  | 266.07 | o |
| -10 | 1  | 12 | 917.69   | 672.87   | 85.76  | o |
| -9  | 1  | 12 | 1302.27  | 1009.31  | 428.79 | < |
| -8  | 1  | 12 | 28.45    | 35.18    | 15.39  | < |
| -7  | 1  | 12 | 136.02   | 131.93   | 21.99  | o |
| -6  | 1  | 12 | 1.04     | 4.40     | 8.80   | < |
| -11 | 2  | 12 | 933.54   | 351.83   | 65.97  | o |
| -10 | 2  | 12 | 10490.40 | 11357.40 | 534.34 | o |
| -9  | 2  | 12 | 600.99   | 668.47   | 65.97  | o |
| -8  | 2  | 12 | 4425.30  | 4331.88  | 283.66 | o |
| -7  | 2  | 12 | 59.34    | 54.97    | 19.79  | < |
| -6  | 2  | 12 | 338.94   | 494.76   | 274.86 | < |
| -5  | 2  | 12 | 10.16    | 13.19    | 13.19  | < |
| -11 | 3  | 12 | 2633.25  | 1734.95  | 343.03 | o |
| -10 | 3  | 12 | 577.79   | 569.52   | 48.38  | o |
| -9  | 3  | 12 | 85.75    | 101.15   | 21.99  | o |
| -8  | 3  | 12 | 184.81   | 189.11   | 26.39  | o |
| -7  | 3  | 12 | 2438.12  | 2566.14  | 149.53 | o |
| -6  | 3  | 12 | 184.60   | 200.10   | 37.38  | o |
| -5  | 3  | 12 | 2282.58  | 2698.08  | 151.73 | o |
| -11 | 4  | 12 | 581.55   | 459.58   | 208.90 | < |
| -10 | 4  | 12 | 135.26   | 96.75    | 46.18  | < |
| -9  | 4  | 12 | 14.15    | 15.39    | 30.78  | < |
| -8  | 4  | 12 | 4804.90  | 5488.51  | 266.07 | o |
| -7  | 4  | 12 | 18.94    | 17.59    | 15.39  | < |
| -6  | 4  | 12 | 6779.94  | 7764.40  | 413.40 | o |
| -5  | 4  | 12 | 182.27   | 162.72   | 19.79  | o |
| -4  | 4  | 12 | 935.46   | 833.39   | 72.56  | o |
| -3  | 4  | 12 | 21.20    | 19.79    | 10.99  | < |
| -11 | 5  | 12 | 8556.13  | 8573.60  | 589.31 | o |
| -10 | 5  | 12 | 32.70    | 70.37    | 43.98  | < |
| -9  | 5  | 12 | 267.88   | 272.67   | 46.18  | o |
| -8  | 5  | 12 | 0.26     | -2.20    | 15.39  | < |
| -7  | 5  | 12 | 608.10   | 606.90   | 46.18  | o |
| -6  | 5  | 12 | 380.87   | 365.02   | 37.38  | o |
| -5  | 5  | 12 | 56.80    | 72.56    | 21.99  | o |

## regerite.cif

|     |   |    |          |          |         |   |
|-----|---|----|----------|----------|---------|---|
| -4  | 5 | 12 | 97.60    | 156.12   | 28.59   | o |
| -3  | 5 | 12 | 21173.30 | 28086.90 | 1767.93 | o |
| -2  | 5 | 12 | 46.64    | 57.17    | 13.19   | o |
| -1  | 5 | 12 | 5819.93  | 7122.31  | 340.83  | o |
| 0   | 5 | 12 | 0.64     | -2.20    | 6.60    | < |
| 1   | 5 | 12 | 380.06   | 505.75   | 54.97   | o |
| 2   | 5 | 12 | 275.27   | 296.86   | 37.38   | o |
| 4   | 5 | 12 | 5.76     | 0.00     | 10.99   | < |
| -11 | 6 | 12 | 835.47   | 415.60   | 120.94  | o |
| -10 | 6 | 12 | 518.21   | 452.98   | 43.98   | o |
| -9  | 6 | 12 | 86.52    | 63.77    | 37.38   | < |
| -8  | 6 | 12 | 3653.43  | 4081.20  | 233.09  | o |
| -7  | 6 | 12 | 117.10   | 131.93   | 28.59   | o |
| -6  | 6 | 12 | 8300.91  | 9554.32  | 457.38  | o |
| -5  | 6 | 12 | 7.77     | 4.40     | 17.59   | < |
| -4  | 6 | 12 | 29.87    | 19.79    | 15.39   | < |
| -3  | 6 | 12 | 143.04   | 145.13   | 21.99   | o |
| -2  | 6 | 12 | 4772.01  | 6075.63  | 325.44  | o |
| -1  | 6 | 12 | 3.17     | 8.80     | 10.99   | < |
| 0   | 6 | 12 | 2838.91  | 3186.24  | 178.11  | o |
| 1   | 6 | 12 | 9.75     | -6.60    | 17.59   | < |
| 2   | 6 | 12 | 688.52   | 811.40   | 72.56   | o |
| 3   | 6 | 12 | 1333.38  | 1363.33  | 112.14  | o |
| -10 | 7 | 12 | 331.49   | 200.10   | 41.78   | o |
| -9  | 7 | 12 | 284.79   | 169.32   | 32.98   | o |
| -8  | 7 | 12 | 1834.73  | 2014.21  | 167.12  | o |
| -7  | 7 | 12 | 503.78   | 505.75   | 54.97   | o |
| -6  | 7 | 12 | 721.50   | 741.04   | 54.97   | o |
| -5  | 7 | 12 | 9290.10  | 11109.00 | 505.75  | o |
| -4  | 7 | 12 | 545.46   | 584.91   | 46.18   | o |
| -3  | 7 | 12 | 1959.51  | 2080.18  | 112.14  | o |
| -2  | 7 | 12 | 1.11     | 32.98    | 17.59   | < |
| -1  | 7 | 12 | 1806.42  | 2014.21  | 107.75  | o |
| 0   | 7 | 12 | 14.58    | 15.39    | 13.19   | < |
| 1   | 7 | 12 | 2328.57  | 2486.98  | 125.34  | o |
| 2   | 7 | 12 | 192.90   | 285.86   | 26.39   | o |
| 3   | 7 | 12 | 25645.60 | 26140.80 | 1165.43 | o |
| -10 | 8 | 12 | 162.39   | 98.95    | 32.98   | < |
| -9  | 8 | 12 | 279.79   | 266.07   | 35.18   | o |
| -8  | 8 | 12 | 1370.63  | 1589.82  | 90.16   | o |
| -7  | 8 | 12 | 137.65   | 123.14   | 28.59   | o |
| -6  | 8 | 12 | 9241.79  | 10963.80 | 507.95  | o |
| -5  | 8 | 12 | 320.12   | 389.21   | 39.58   | o |
| -4  | 8 | 12 | 50.34    | 50.58    | 19.79   | < |
| -3  | 8 | 12 | 147.51   | 217.69   | 28.59   | o |
| -2  | 8 | 12 | 1331.86  | 1416.11  | 81.36   | o |
| -1  | 8 | 12 | 65.22    | 90.16    | 19.79   | o |
| 0   | 8 | 12 | 1516.30  | 1976.83  | 105.55  | o |
| 1   | 8 | 12 | 225.52   | 255.07   | 26.39   | o |
| 2   | 8 | 12 | 2532.28  | 2645.31  | 136.33  | o |
| 3   | 8 | 12 | 233.08   | 171.52   | 28.59   | o |
| -9  | 9 | 12 | 204.23   | 189.11   | 30.78   | o |
| -8  | 9 | 12 | 623.97   | 492.56   | 43.98   | o |
| -7  | 9 | 12 | 2925.18  | 3346.76  | 175.91  | o |

regerite.cif

|    |    |    |         |         |        |   |
|----|----|----|---------|---------|--------|---|
| -6 | 9  | 12 | 43.43   | 21.99   | 17.59  | < |
| -5 | 9  | 12 | 1191.68 | 1191.82 | 112.14 | o |
| -4 | 9  | 12 | 68.52   | 90.16   | 24.19  | o |
| -3 | 9  | 12 | 7663.51 | 9242.08 | 611.30 | o |
| -2 | 9  | 12 | 2.94    | -10.99  | 15.39  | < |
| -1 | 9  | 12 | 377.57  | 380.41  | 35.18  | o |
| 0  | 9  | 12 | 159.22  | 158.32  | 24.19  | o |
| 1  | 9  | 12 | 2064.74 | 2091.18 | 114.34 | o |
| 2  | 9  | 12 | 57.68   | 81.36   | 19.79  | o |
| -8 | 10 | 12 | 2051.69 | 1515.06 | 90.16  | o |
| -7 | 10 | 12 | 151.24  | 136.33  | 26.39  | o |
| -6 | 10 | 12 | 1730.45 | 1932.85 | 112.14 | o |
| -5 | 10 | 12 | 18.43   | -6.60   | 17.59  | < |
| -4 | 10 | 12 | 3553.29 | 3755.76 | 193.51 | o |
| -3 | 10 | 12 | 75.26   | 107.75  | 24.19  | o |
| -2 | 10 | 12 | 1507.12 | 1479.88 | 127.54 | o |
| -1 | 10 | 12 | 294.93  | 285.86  | 32.98  | o |
| 0  | 10 | 12 | 469.30  | 417.80  | 37.38  | o |
| 1  | 10 | 12 | 512.29  | 582.72  | 46.18  | o |
| 2  | 10 | 12 | 682.24  | 430.99  | 57.17  | o |
| -7 | 11 | 12 | 35.50   | 54.97   | 26.39  | < |
| -6 | 11 | 12 | 0.47    | 4.40    | 17.59  | < |
| -5 | 11 | 12 | 3100.53 | 3623.83 | 189.11 | o |
| -4 | 11 | 12 | 32.06   | 21.99   | 19.79  | < |
| -3 | 11 | 12 | 1692.45 | 1554.64 | 92.35  | o |
| -2 | 11 | 12 | 1.13    | 19.79   | 17.59  | < |
| -1 | 11 | 12 | 2939.21 | 3311.58 | 171.52 | o |
| 0  | 11 | 12 | 36.16   | 17.59   | 15.39  | < |
| 1  | 11 | 12 | 2810.77 | 2438.61 | 173.71 | o |
| -5 | 12 | 12 | 19.75   | 26.39   | 17.59  | < |
| -4 | 12 | 12 | 5657.77 | 6816.66 | 329.84 | o |
| -3 | 12 | 12 | 80.63   | 105.55  | 24.19  | o |
| -2 | 12 | 12 | 2800.94 | 2680.49 | 142.93 | o |
| -1 | 12 | 12 | 1.46    | 32.98   | 26.39  | < |
| 0  | 12 | 12 | 2.81    | 19.79   | 37.38  | < |

```

loop_
_twin_refl_datum_id
_twin_refl_individual_id
_twin_refl_index_h
_twin_refl_index_k
_twin_refl_index_l
_twin_refl_F_squared_calc
_twin_refl_F_squared_meas
_twin_refl_F_squared_sigma
_twin_refl_include_status
? ? ? ? ? ? ? ? ?

```
